# Supplementary material for: Inhibition of p38-MK2 pathway enhances the efficacy of microtubule inhibitors in breast cancer cells
Source: eLife. 2025 May 29;13:RP104859. doi: 10.7554/eLife.104859 (PMC12122001; doi:10.7554/eLife.104859)
Supplement: Figure 6—source data 1. [file elife-104859-fig6-data1.xlsx]

## Sheet: DESeq2_MDA-MB-231
symbol	CMPD1-Control_log2FC	CMPD1-Control_adjPval	PTX-Control_log2FC	PTX-Control_adjPval	Control_1	Control_2	Control_3	CMPD1_1	CMPD1_2	CMPD1_3	PTX_1	PTX_2	PTX_3
TUBA1B	-2.23435	1.60279e-112	0.403745	0.00325916	12.0298	11.779	12.0912	9.75575	9.7844	9.6905	12.2892	12.2394	12.5772
TUBB4B	-2.38064	5.40604e-83	0.62547	4.04061e-08	9.18243	9.22171	9.24645	6.94302	6.77108	6.91391	9.76926	9.7803	9.95943
TUBA1C	-1.82664	1.86439e-71	0.199299	0.40989	11.0477	11.0091	11.1142	9.26996	9.1968	9.24689	11.1275	11.0986	11.5068
STC1	1.48574	1.17843e-56	-0.170608	0.538982	8.98468	9.00723	9.07315	10.5868	10.471	10.4415	8.69436	8.85367	8.99612
ANKRD1	1.01905	7.22121e-43	-0.177817	0.296101	9.93319	9.85177	9.84182	10.8759	10.8894	10.9115	9.69912	9.72913	9.66994
IGFBP4	-1.44499	5.88641e-41	-0.386451	0.01019	9.99267	10.1598	10.3081	8.85186	8.73789	8.56815	9.76128	9.68147	9.87278
SLC20A1	-1.17004	2.30829e-28	-0.223945	0.295752	9.3113	9.42497	9.51613	8.30278	8.23898	8.23922	9.19157	9.24954	9.14894
ZFP36L1	1.04202	5.86362e-28	-0.35175	0.016781	9.41671	9.4063	9.62756	10.6492	10.437	10.4827	9.16761	9.16735	9.07718
TUBA4A	-1.67398	6.7768e-26	0.431822	0.0387009	8.14626	8.01293	8.30833	6.36157	6.58209	6.62818	8.52366	8.52209	8.71128
AKAP12	1.27853	9.92511e-24	-0.64151	0.000135996	9.30532	8.99618	8.96239	10.4273	10.3621	10.3176	8.62567	8.61522	8.07998
TNFAIP2	-1.751	4.46975e-23	-0.33347	0.315853	7.88284	7.93403	7.90752	6.17042	6.2123	6.25212	7.50906	7.43925	7.77119
LIMA1	1.26197	8.46432e-23	0.0838363	0.910654	8.26599	8.23134	8.00219	9.40878	9.30193	9.54267	8.40571	8.32481	7.99908
MT1E	0.968584	9.22745e-23	0.749642	1.86217e-12	10.2045	10.402	10.3881	11.3657	11.1585	11.3675	10.9688	10.9927	11.2647
TOP2A	-0.812906	4.58552e-22	0.0435457	0.927163	11.9193	11.9419	11.7298	11.1702	10.9159	11.0687	11.9291	11.9295	11.8712
ADAMTS6	2.3459	4.71442e-21	0.288184	0.783676	6.06701	5.70353	4.91809	7.92612	7.73746	7.99272	6.21531	5.95933	5.43794
HMGB3	-1.64018	4.91184e-20	-0.237417	0.628567	8.16399	8.05615	8.46427	6.88885	6.41774	6.58232	8.12134	7.75792	8.10597
DDIT4	-1.42773	7.60457e-18	-0.320688	0.356646	8.55508	8.67083	8.8137	7.08231	7.65864	6.99783	8.33002	8.21006	8.53884
CREB5	2.11778	1.12025e-17	-0.279842	NA	5.25354	5.49948	5.1563	7.40537	7.28206	7.23368	5.34323	5.0713	4.68045
CENPE	-1.43775	1.99486e-16	-0.00607154	0.995068	8.24533	7.87492	8.11945	6.83255	6.48574	6.72984	8.28618	8.00737	7.93092
IRF2BPL	-0.971357	3.43017e-16	-0.240818	0.315853	9.04331	9.03989	9.20283	8.17278	8.15793	8.07781	8.81649	8.75139	8.99612
CAV1	-0.978494	1.05414e-15	-0.246018	0.314521	8.85428	8.81932	8.93599	7.84308	7.92672	7.93914	8.58645	8.54199	8.74475
TIMP3	-1.07856	1.59619e-14	-0.0713024	0.924914	8.45063	8.72539	8.76354	7.73206	7.59078	7.43633	8.61508	8.48966	8.63479
RXRA	-1.75413	4.03857e-14	-0.281578	NA	7.02332	7.19349	7.21664	5.59144	5.36233	5.50046	6.9132	6.67322	7.01049
TMEM158	0.790151	4.77558e-14	-0.103497	0.806485	9.93577	10.0044	10.1343	10.8759	10.9327	10.6177	9.78036	9.95229	10.029
GSTO1	0.826208	6.47153e-14	0.210836	0.421308	9.26277	9.51484	9.37781	10.1861	10.2058	10.2384	9.42776	9.52626	9.81092
TFPI2	1.39136	6.47535e-14	0.49207	0.15066	6.96384	6.79472	6.35398	8.23924	8.11563	7.87718	7.13699	7.10649	7.35196
LCP1	0.825014	8.06063e-14	-0.17361	0.601868	8.3302	8.33587	8.40775	9.21872	9.18917	9.11888	8.17039	8.20508	8.18612
COL13A1	-0.757363	1.02401e-13	-0.129607	0.682324	9.73102	9.61036	9.75839	8.95103	8.9752	8.92121	9.6653	9.60217	9.44204
FRMD6	1.03065	2.39094e-13	0.185786	0.705166	7.4777	7.61799	7.48052	8.52774	8.53619	8.55633	7.81079	7.7982	7.49256
NOX5	-2.46017	2.81586e-13	-0.582764	NA	6.17585	6.92866	7.0094	4.60925	4.73846	4.12205	6.23389	5.93545	6.3698
TUBA1A	-1.83749	3.66281e-13	0.712492	0.0115293	6.90181	6.88138	7.03948	5.15967	5.3257	5.16927	7.61208	7.28717	7.93673
PPP1R15A	1.1359	4.02497e-13	0.123191	0.868375	7.90409	7.44181	7.45099	8.87294	8.73789	8.59149	7.63322	7.9127	7.65629
COL6A1	-1.34864	4.85604e-13	-0.240287	0.629773	7.60644	7.82581	7.78861	6.71292	6.43504	6.10851	7.56882	7.4645	7.48466
IER5L	-1.49194	5.37228e-13	-0.245342	0.665916	7.26422	7.32298	7.50945	5.81128	6.15079	5.8232	7.1663	7.14864	7.07507
SFPQ	-0.857113	8.76352e-13	0.133844	0.751891	9.81335	9.63016	9.59756	8.81238	8.61422	9.03907	9.86772	9.88687	9.68898
LFNG	-2.78214	8.76352e-13	0.0419241	NA	6.19322	6.31477	5.99333	3.27333	4.03375	3.94008	6.3406	6.05108	6.22552
ANLN	-0.870551	9.33242e-13	0.00961971	0.987421	8.91311	8.75192	8.85938	7.94616	7.89581	8.09968	8.90029	8.78184	8.87439
ADM	-1.51329	1.05918e-12	-0.101459	0.927105	7.79456	7.75545	8.04729	6.23699	6.74357	6.15102	7.62621	7.48932	8.12134
ID1	-1.21197	1.88234e-12	-0.257103	0.546335	8.15071	8.52848	8.40775	6.94302	7.47007	7.06607	8.04449	7.9726	8.30756
HNRNPM	-0.698852	2.42152e-12	-0.34074	0.0116749	10.051	9.81921	9.93809	9.16275	9.23435	9.33019	9.61126	9.64697	9.54252
SNED1	-2.5909	2.42152e-12	-0.396996	NA	6.15827	6.16489	6.7186	3.8282	4.3579	4.03393	6.23389	5.91116	5.81091
H1-0	-0.862406	3.51248e-12	-0.0837841	0.884682	9.23579	9.15121	9.2888	8.54097	8.43232	8.11587	9.03881	9.15189	9.23389
HES1	-1.82476	6.50507e-12	-0.0280307	0.9829	7.10817	7.40885	7.59969	5.62498	5.76941	5.53297	7.86543	7.00689	7.02146
PTMA	-0.569509	8.95236e-12	-0.0481802	0.913397	11.95	11.7558	11.7378	11.2252	11.2766	11.2453	11.8436	11.7967	11.6633
KRT18	-1.07939	1.47045e-11	-0.367423	0.198223	8.34969	8.31823	8.62826	7.20932	7.47843	7.42771	8.06539	7.86293	8.27127
PALM2AKAP2	0.804896	2.14568e-11	-0.152497	0.712807	9.31527	8.93671	8.99345	9.89797	9.83416	9.94575	8.93193	9.09644	8.78069
FADS1	-0.600382	2.37087e-11	-0.156607	0.457733	9.98272	9.96523	9.93276	9.40396	9.37098	9.31391	9.81162	9.74123	9.85756
DPYSL2	-1.4449	2.60167e-11	-0.650201	0.0241097	7.54012	7.19349	7.69724	5.89612	6.23223	6.15102	7.0241	6.8239	6.7187
KIF20A	-1.50091	3.54938e-11	0.339202	0.481125	7.20552	7.07241	7.08825	5.72113	5.39807	5.9247	7.5467	7.1896	7.59154
INHBA	1.52315	3.90811e-11	0.701287	0.0571111	6.15827	5.70353	5.95176	7.41499	7.51143	7.3107	6.3059	6.99539	6.46926
SMC4	-0.769972	4.0779e-11	-0.0778865	0.893816	11.0357	10.7193	10.9583	10.0813	9.94097	10.3725	10.9415	10.7447	10.8061
INSYN2B	1.53318	6.39587e-11	0.00297565	NA	5.9078	5.92952	5.62149	7.17577	7.30106	7.38382	5.85623	6.11626	5.43794
AOX1	1.57652	7.35107e-11	0.39936	NA	5.96958	6.01961	5.51135	7.27415	7.52766	7.25332	5.90341	6.59915	6.08625
TINAGL1	-1.15462	7.59415e-11	-0.0962016	0.913397	7.81153	7.97964	7.82359	6.99524	6.50225	6.71575	7.5978	7.88803	7.83473
MSN	0.687242	8.51329e-11	-0.253937	0.233101	9.16494	9.05595	9.18276	9.96169	9.70639	9.78126	8.96567	8.8758	8.80627
ASPM	-0.946345	1.05838e-10	0.0662804	0.934676	8.71993	8.46975	8.78736	7.72435	7.55165	7.90228	8.89446	8.6039	8.68047
HBEGF	0.732444	1.16552e-10	-0.0310541	0.966556	8.32233	8.48169	8.40004	9.17695	9.05851	9.14541	8.34291	8.42253	8.34732
GADD45A	1.36591	1.66024e-10	-0.38243	0.530925	6.12246	6.33245	6.25492	7.61179	7.44466	7.60637	5.41011	6.05108	6.08625
EGR1	-0.992386	1.80515e-10	-0.696114	0.000135996	8.29444	8.5849	8.76053	7.70096	7.56743	7.4703	7.87729	7.77147	7.95971
MARCKSL1	-1.62867	1.80515e-10	-0.445894	0.39209	7.01357	7.09331	7.56565	5.55712	6.0193	5.43315	7.0241	6.50495	6.85979
CD82	-1.15451	2.01372e-10	-0.216242	0.69811	7.96096	8.13888	7.96611	7.25286	6.88878	6.45237	7.79836	7.83093	7.80331
TOX2	-0.958263	3.30114e-10	-0.642329	0.000519443	8.42513	8.5775	8.82526	7.7775	7.73746	7.49526	8.11634	7.90657	7.91924
CDCP1	0.707001	3.33871e-10	-0.0117528	0.984584	9.71908	9.83636	9.50539	10.4946	10.3901	10.3011	9.50245	9.82648	9.69755
CCNB1	-0.916586	3.80206e-10	0.382248	0.0958961	9.23788	9.28211	9.33197	8.22291	8.10486	8.72059	9.77561	9.45456	9.74132
TRIB2	-1.44166	4.08624e-10	-0.27779	0.663088	7.02332	7.32298	7.49506	5.68979	6.12969	5.87484	7.09695	6.75735	7.17666
RND3	1.01117	6.96449e-10	0.0879009	0.927105	7.07107	7.25969	6.989	8.19528	7.96296	8.13188	7.0453	7.23921	7.28983
USP53	1.06639	9.69393e-10	0.107495	0.913397	6.83699	6.74276	6.87132	7.8921	7.88326	7.79913	7.05578	6.99539	6.6915
SSR3	0.633376	9.81482e-10	0.0953212	0.819094	10.2704	10.4565	10.1493	10.9129	11.0047	10.8651	10.3263	10.2796	10.5548
PLAUR	0.632883	1.05097e-09	0.173399	0.502044	9.34859	9.28892	9.34607	10.0843	9.88068	9.90286	9.37224	9.48983	9.62931
MGLL	1.02779	1.19467e-09	-0.141667	0.862933	7.07107	6.79472	7.06894	8.011	7.90205	8.05561	6.96972	6.74367	6.82266
CDKN2C	-1.74016	1.39038e-09	-0.147453	NA	6.57079	6.8325	6.50531	4.91055	5.2495	4.89692	6.54784	6.17861	6.7187
LAMA5	-1.62882	1.81695e-09	-0.575154	NA	6.81472	7.09331	7.03948	5.44894	5.82297	4.94603	6.59172	6.56843	6.08625
CDCA3	-1.13107	2.10262e-09	0.0339942	0.968255	7.44907	7.66062	7.38224	6.43902	6.25189	6.51881	7.49373	7.54561	7.5618
GSE1	-1.05143	2.26957e-09	-0.165783	0.783676	7.96603	7.99638	8.00219	6.72843	7.13099	6.98614	8.07572	7.72348	7.63503
ETS1	0.852737	6.87011e-09	-0.0427102	0.966556	7.71864	7.8628	7.50227	8.61376	8.4537	8.55237	7.76041	7.69531	7.50824
HNRNPA2B1	-0.659097	8.00118e-09	-0.238431	0.293369	10.2653	9.99191	10.4351	9.59584	9.51218	9.64847	9.94163	10.0149	10.0572
USP36	1.0568	8.43091e-09	0.228331	0.715223	6.81472	6.96313	6.68093	7.91938	7.60614	8.00436	7.09695	7.10649	6.91963
KLF6	0.741449	9.18144e-09	-0.506152	0.00497662	8.22436	8.32266	8.46796	8.99015	9.21695	9.00761	7.92381	7.73043	7.86549
NAV3	1.25092	1.17312e-08	0.415275	0.421308	6.51664	6.38425	6.27191	7.72435	7.15207	7.85163	6.74206	6.92437	6.70516
MAP2K3	0.934464	1.29431e-08	-0.0645975	0.955158	6.92279	7.15425	7.04936	7.9058	7.97484	7.98686	6.96972	7.00689	6.96578
SARS1	0.820078	1.45507e-08	0.13004	0.83098	7.55363	7.46605	7.42084	8.22291	8.30164	8.33452	7.61208	7.66659	7.5467
FAM111B	-1.56749	1.45507e-08	-0.619471	NA	6.99389	6.48257	6.76733	5.01541	5.50024	5.32591	6.25223	6.19882	6.06521
TUBG1	-1.03892	1.85697e-08	0.346354	0.307207	7.58027	7.86887	7.50227	6.51252	6.88878	6.50248	7.9744	8.01878	7.99908
JUN	0.565309	1.96646e-08	-0.31648	0.0373386	9.06706	9.1537	9.10193	9.73862	9.68485	9.58205	8.77902	8.80837	8.79354
GALNT10	-0.975305	2.07997e-08	-0.257176	0.530925	7.74831	7.74888	7.80036	6.98236	6.77108	6.68715	7.62621	7.40488	7.50042
IL11	-0.742076	2.60513e-08	0.164306	0.655569	8.52453	8.37906	8.49353	7.64485	7.83193	7.72368	8.62918	8.66689	8.59497
TFAP2C	-1.25922	3.86082e-08	0.118073	0.912635	6.95369	7.00784	7.21664	5.84011	5.65593	6.0647	7.23247	6.9721	7.30785
WDR3	0.829787	4.23771e-08	0.19823	0.682324	7.4777	7.56661	7.44351	8.15568	8.46638	8.29241	7.64021	7.79157	7.63503
COX20	-0.942011	4.23771e-08	-0.261958	0.502044	7.85037	7.78786	8.05712	6.91619	6.87617	7.1418	7.60496	7.56908	7.75814
CDKN2D	-1.23642	4.23771e-08	-0.375329	NA	6.98394	7.10365	7.11674	5.84011	5.84903	5.97289	6.80554	6.53704	6.75857
TPM4	0.46289	4.25015e-08	-0.188293	0.262705	10.1219	10.2463	10.1834	10.6944	10.6184	10.6243	9.9388	9.98755	10.0612
NARS1	0.541979	5.26668e-08	-0.0215229	0.968255	9.21256	9.1159	9.15555	9.69587	9.76913	9.63542	9.08303	9.18264	9.15642
AURKA	-0.738876	6.32128e-08	0.498232	0.00309476	9.39998	9.2074	9.2699	8.68305	8.2439	8.71706	9.92315	9.62474	9.80775
BIRC5	-0.779834	7.79181e-08	0.163791	0.711428	8.25776	8.48959	8.33686	7.50778	7.47843	7.77894	8.56826	8.50191	8.50408
ADAMTS1	2.08502	7.92241e-08	0.929087	NA	4.36711	4.30085	3.9782	6.34154	5.87462	5.89999	5.2731	4.98086	4.68045
CHST15	-1.61117	8.29701e-08	-0.425526	NA	6.43139	6.71607	7.08825	5.33199	5.43293	4.99353	6.70259	6.25778	6.04386
NUCKS1	-0.449132	8.5144e-08	-0.242661	0.0473497	11.7121	11.5297	11.6872	11.2965	11.1	11.189	11.424	11.3963	11.3889
PSMD2	0.589427	1.03903e-07	-0.0499644	0.939399	9.18894	9.25686	9.35407	9.97637	9.72409	9.85383	9.08559	9.32959	9.23153
IL24	4.08523	1.13772e-07	1.76826	NA	2.90735	2.31669	2.53835	5.44894	4.99332	5.50046	3.13998	3.82926	3.44442
MITF	0.797561	1.35479e-07	0.265895	0.466332	7.58027	7.49774	7.45099	8.42202	8.33889	8.11049	7.83533	7.77147	7.70471
SGO2	-0.924253	1.35479e-07	0.231552	0.589258	7.69445	7.63234	7.73448	6.96937	6.55068	6.82481	7.83533	7.96672	7.94251
MMP1	1.63536	1.46194e-07	0.632578	NA	5.18575	5.33375	4.87427	6.47624	6.92597	6.53495	5.23672	5.70062	6.08625
RBMS3	1.13417	1.77929e-07	0.0516763	0.967349	6.2441	6.34993	6.16684	7.32604	7.34749	7.36589	6.15809	6.61427	6.08625
HDAC9	1.27575	1.85969e-07	0.0833873	NA	6.06701	5.97527	5.51135	6.95626	7.0769	7.21376	5.80744	6.11626	5.90864
CENPF	-0.743055	2.07173e-07	-0.193087	0.628567	10.5041	9.95955	10.2768	9.48152	9.37098	9.70127	10.2324	10.0939	9.86671
ZCCHC24	-0.940879	2.21422e-07	-0.343229	0.321442	7.64482	7.89291	7.66545	6.99524	6.72961	6.72984	7.39812	7.30592	7.49256
GARS1	0.909486	2.30277e-07	0.16677	0.810829	7.17962	6.84488	7.29352	7.95277	7.94496	8.12656	7.34784	7.10649	7.37779
SLC4A7	0.658744	2.38071e-07	0.122595	0.797052	8.68352	8.47772	8.33282	9.19938	9.06129	9.21218	8.71764	8.63017	8.52734
BNIP3	-0.821531	2.69371e-07	-0.257425	0.495471	8.79863	8.9396	9.2443	8.22291	8.33889	7.99855	8.64315	8.581	8.99333
MIDN	-0.844615	2.72671e-07	-0.259596	0.493225	7.90935	8.00743	7.98168	7.25286	6.95025	7.2037	7.81696	7.67382	7.63503
GIT1	0.869	3.03068e-07	-0.158322	0.822287	7.30473	7.14427	7.07863	8.06697	7.87694	8.13717	6.8782	7.11715	7.07507
IRF1	-1.28786	3.25243e-07	0.137743	NA	6.80346	6.72948	6.57541	5.48591	5.3257	5.65615	6.75498	6.8624	6.89599
PPME1	-0.745493	3.86908e-07	-0.193741	0.620326	8.13282	8.28682	8.31244	7.48969	7.5437	7.50349	7.9744	8.10694	8.07998
EML2	0.834404	4.06178e-07	0.0395387	0.967349	7.65738	7.58886	7.29352	8.53657	8.22413	8.24904	7.53925	7.69531	7.43632
UGCG	0.659706	4.28414e-07	0.147438	0.749602	8.63351	8.47772	8.44941	9.12223	9.17379	9.23212	8.51988	8.56163	8.8954
DEK	-0.432091	4.28414e-07	-0.13717	0.495471	11.1623	10.9366	11.1012	10.6411	10.6022	10.6734	10.9266	10.9101	10.9629
H4C3	-1.01103	4.28414e-07	-0.539671	0.0817217	12.5115	12.8863	12.4775	11.7738	11.5998	11.4942	11.8253	12.1084	12.3184
RPS27L	0.532305	4.41754e-07	0.18781	0.437918	9.05524	9.19053	9.18724	9.73478	9.59918	9.6869	9.27017	9.27593	9.44204
PTPRJ	-1.09124	4.52613e-07	0.0339812	0.971551	7.32851	7.25969	7.23408	6.10063	6.32796	6.23246	7.53925	7.33359	6.99944
JAG1	-0.95483	4.79873e-07	-0.503404	0.0681938	7.65111	7.64655	7.93445	6.98236	6.58209	6.8764	7.19503	7.39616	7.17666
CDC25B	-0.989128	5.20634e-07	0.190967	0.764105	7.62575	7.40885	7.52371	6.80356	6.29043	6.5667	7.72145	7.52975	7.85939
KRT80	-1.13169	5.35804e-07	-0.113871	0.914677	7.01357	7.20313	7.24272	5.72113	6.2123	6.21253	7.07651	6.8624	7.17666
DUSP6	-0.659697	6.23037e-07	-0.601236	7.52656e-05	9.52184	9.56993	9.82465	8.92771	9.14779	8.87757	9.10843	8.8312	9.17863
MOB3A	-1.16823	6.24496e-07	-0.532427	0.16113	7.06165	7.34928	7.22538	6.32123	5.94877	5.9964	6.75498	6.92437	6.3698
SUCLG2	0.776641	6.31469e-07	0.0411264	0.966556	7.73652	7.6035	7.77675	8.36859	8.51601	8.52839	7.9744	7.74424	7.48466
MIR3681HG	-2.3298	6.35313e-07	-0.224827	NA	5.77569	5.64812	5.6989	4.13791	3.615	3.48827	6.01504	5.11447	5.18837
IL1B	0.639809	6.5898e-07	0.0448023	0.961854	8.75251	8.81932	8.86778	9.56594	9.46031	9.31157	8.70438	8.75139	9.08765
LINC00261	-1.96749	6.68632e-07	-0.371695	NA	5.9896	5.92952	5.84228	3.70818	4.42871	4.35809	5.53522	5.23675	5.88482
ITGA1	-0.99814	6.84126e-07	0.0342095	0.969241	7.40503	7.6676	7.5518	6.54791	6.40022	6.75762	7.79836	7.55348	7.34324
BCL2A1	1.69062	6.9501e-07	0.196278	NA	4.48462	4.88404	4.82907	6.21514	6.46904	6.10851	4.81125	4.72635	5.14892
SNAPC1	0.498518	7.48441e-07	0.157709	0.531803	9.18678	9.21933	9.20725	9.66799	9.65563	9.77278	9.30134	9.3227	9.45423
HPCAL1	-0.521082	7.98514e-07	-0.224744	0.263246	10.808	10.6602	10.8822	10.3504	10.3382	10.1002	10.4694	10.5113	10.6966
LASP1	-0.499439	9.30497e-07	-0.315956	0.0222709	10.3266	10.3905	10.4668	10.0615	9.80118	9.81965	9.98889	10.0939	10.1551
LINC02870	-1.82625	9.49583e-07	-0.232655	NA	5.92869	5.88227	5.86485	4.46858	4.12187	4.28362	5.70463	5.75621	5.56329
BAG3	-0.878764	9.9686e-07	-0.284465	0.493225	7.95589	7.81956	7.98683	6.88885	7.1096	7.17308	7.78582	7.35174	7.75157
FUT11	-1.04971	1.11011e-06	-0.262466	0.642998	7.06165	7.23169	7.46583	6.12427	6.29043	6.32819	6.90163	7.02963	7.08556
TPI1	-0.547702	1.13516e-06	-0.187888	0.468827	9.90316	9.98912	10.0943	9.50872	9.41088	9.43712	9.74031	9.66523	10.003
SREBF1	-1.29922	1.31069e-06	-0.0767203	NA	6.88053	6.85715	6.54777	5.01541	5.68515	5.79666	6.67566	6.83685	6.5623
NASP	-0.587521	1.34134e-06	-0.292924	0.139594	9.48	9.14871	9.37781	8.74916	8.71682	8.81284	9.13832	8.9787	9.03451
GNPDA1	0.709253	1.43862e-06	0.212217	0.598002	7.96603	8.31378	7.95036	8.93775	8.63308	8.77257	8.22713	8.24448	8.40288
FADS2	-0.856089	1.48908e-06	-0.36306	0.276187	8.29041	8.43334	8.68644	7.85018	7.72345	7.2823	8.317	7.96081	8.05884
FSCN1	-0.62738	1.66213e-06	-0.165492	0.639975	8.60135	8.66735	8.63155	8.09715	8.05537	7.8835	8.40571	8.48966	8.51188
ETV1	-0.887289	1.77314e-06	0.101913	0.901956	7.51271	7.51333	7.46583	6.42004	6.71552	6.7438	7.5467	7.65932	7.58416
PSIP1	-0.770218	1.93892e-06	-0.393203	0.122457	8.64302	8.15388	8.37274	7.68515	7.52766	7.72368	8.02328	8.07451	7.954
DLGAP5	-0.802075	2.13916e-06	-0.0103255	0.989799	8.43976	8.11353	8.40775	7.35631	7.43609	7.7857	8.35993	8.12289	8.45234
FTL	0.421719	2.48226e-06	0.148809	0.492828	11.8068	11.8085	11.7575	12.2487	12.2808	12.1017	11.8379	11.878	12.0904
MT2A	0.468747	3.17255e-06	0.137951	0.620326	14.0672	14.0723	14.2386	14.7057	14.5214	14.5571	14.1338	14.1769	14.4649
NFIX	0.913571	3.43507e-06	0.0720309	0.958427	6.67337	6.86932	6.58903	7.75496	7.4188	7.61399	6.88996	6.79765	6.6497
GAS2L1	-1.22745	3.62297e-06	-0.278662	NA	6.80346	6.8325	6.77926	5.55712	5.36233	5.949	6.50259	6.27691	6.78455
ABL2	0.785687	4.02202e-06	-0.00490612	0.995068	7.26422	7.19349	7.0094	8.011	7.83193	7.93914	7.11711	7.24893	7.09597
DHX9	-0.607376	4.40519e-06	-0.155295	0.69355	8.82115	8.66386	8.8137	8.18969	8.00412	8.29715	8.65698	8.56941	8.61683
ABHD5	0.939087	4.52848e-06	0.108931	0.924914	6.6484	6.52933	6.60252	7.25286	7.65125	7.57549	6.68918	6.84968	6.5472
TOP1	-0.454345	4.61379e-06	-0.120228	0.684292	10.6464	10.4104	10.5785	10.0993	10.0573	10.131	10.5494	10.3726	10.3569
KIF2C	-0.895275	4.68681e-06	0.288688	0.502044	7.73058	7.99082	7.86896	7.15297	6.46904	7.24353	8.23176	8.18497	8.02655
PSAT1	0.809214	4.97946e-06	0.0891765	0.927105	6.8259	6.96313	6.95785	7.71659	7.67329	7.72368	7.0453	6.93645	7.02146
KISS1	1.03496	5.05813e-06	-0.0149516	NA	6.06701	6.26037	6.05351	7.14143	7.22352	6.98614	6.15809	6.13734	6.04386
VEGFA	-0.790716	5.5029e-06	-0.360825	0.239976	7.74243	7.8567	7.91835	7.11807	7.19333	6.8764	7.42263	7.48109	7.55427
CDKN1A	1.14455	6.49029e-06	-0.0127216	NA	5.92869	6.16489	6.22033	7.40537	7.31981	6.83788	5.78242	6.38665	6.06521
RRM2	-0.629464	6.49029e-06	-0.214186	0.495471	8.45063	8.46575	8.37274	7.8852	7.71639	7.82562	8.29063	8.17989	8.18124
DKK1	1.28823	6.57273e-06	0.852799	NA	5.70481	5.36846	5.64776	6.54791	6.90129	6.91391	6.07809	6.13734	6.81007
NCAPG	-0.733912	8.00525e-06	-0.139989	0.809876	7.99107	7.88693	8.09102	7.11807	7.3291	7.35683	7.74754	7.89424	7.91924
TRIOBP	-0.91272	8.00525e-06	-0.160225	0.83098	7.57366	7.62518	7.47319	6.78885	6.86344	6.30955	7.20448	7.56908	7.41152
ATOX1	0.630937	9.10483e-06	0.153227	0.758716	7.8935	8.27772	8.12414	8.77926	8.74137	8.663	8.15097	8.24934	8.36033
CCBE1	1.14139	9.11468e-06	0.113096	NA	6.02882	5.99761	5.67356	6.95626	7.20346	6.79831	6.21531	6.07313	5.70606
LINC02434	1.29984	1.02229e-05	-0.419636	NA	5.28628	5.33375	5.36069	6.53033	6.41774	6.65797	4.90697	4.8336	5.10835
MAT2A	-1.07776	1.12869e-05	0.192437	NA	7.00376	6.67507	6.73093	5.68979	5.82297	5.84925	6.95859	6.88751	7.13688
SH3BP5L	0.923796	1.13831e-05	0.288679	0.628567	6.47464	6.40111	6.40107	7.45282	7.28206	7.21376	6.83017	6.75735	6.50094
CD274	2.17846	1.16728e-05	0.351743	NA	4.02311	3.88758	3.49018	5.62498	5.79644	5.4672	4.12783	4.54886	3.30778
KIF20B	-0.614924	1.23103e-05	0.00404086	0.995068	9.21893	8.91926	9.11846	8.39312	8.29691	8.72059	9.17484	9.06101	9.04798
MAFK	0.971294	1.26702e-05	0.00879021	0.994587	6.50277	6.96313	6.36984	7.78493	7.58304	7.32005	6.54784	6.77091	6.59203
SLC16A3	-0.896625	1.26702e-05	-0.248665	0.642928	7.1883	7.46605	7.55874	6.51252	6.55068	6.5667	7.2232	7.0183	7.25308
PGK1	-0.578579	1.3724e-05	-0.113919	0.812646	9.21468	9.27298	9.43172	8.72617	8.80929	8.66667	9.11596	9.02469	9.41735
PLEKHM2	0.926069	1.37943e-05	0.220278	0.773062	6.62299	6.76898	6.40107	7.6034	7.27247	7.60637	6.64822	7.04086	6.73211
PEA15	0.540768	1.38853e-05	-0.030589	0.966556	8.63351	8.69495	8.62496	9.26731	9.05851	9.22964	8.50083	8.581	8.76772
COL7A1	-1.31088	1.41471e-05	-0.200886	NA	6.29325	6.63287	6.41643	5.2484	5.36233	5.08407	6.05738	6.56843	6.10699
KTN1	-0.408648	1.56654e-05	-0.27243	0.0373386	11.0619	10.827	11.0565	10.61	10.5275	10.5976	10.7858	10.7056	10.6488
CBX5	-0.680837	1.64824e-05	-0.371001	0.131207	8.03988	8.09811	8.12881	7.44346	7.3291	7.48699	7.6814	7.83739	7.64924
KIF14	-0.829717	1.64824e-05	0.263905	0.534906	7.58027	7.34057	7.42843	6.66537	6.53472	6.7438	7.84744	7.65201	7.62787
RAD21	-0.443559	1.69698e-05	-0.0445147	0.93535	10.0874	10.0744	10.2852	9.74625	9.64265	9.74182	10.088	10.0305	10.2004
SUN3	1.78243	1.82077e-05	0.721594	NA	4.09878	4.78476	3.9782	6.0766	5.94877	5.59588	4.81125	5.23675	4.68045
CHCHD2	0.350668	1.88642e-05	0.143833	0.41854	10.6768	10.7746	10.7588	11.0846	11.044	11.1311	10.8345	10.8523	10.9522
TTYH3	-0.678849	1.95757e-05	-0.139446	0.797052	8.05421	7.93981	8.07175	7.46213	7.37465	7.23368	7.88906	7.86293	7.90747
TRIML2	1.6373	1.96652e-05	0.287308	NA	4.53997	4.22713	4.6843	6.12427	6.0193	5.68537	4.76089	4.66958	4.7871
P4HA1	-0.564957	2.08838e-05	0.0961074	0.857777	8.68659	8.75192	8.99089	8.22838	8.32038	8.21938	8.9573	8.88829	8.88643
SRGN	0.590959	2.11076e-05	0.166617	0.704062	8.0871	8.1489	8.26656	8.70673	8.69185	8.85524	8.24556	8.23473	8.50408
AXL	0.467903	2.24156e-05	-0.136747	0.682496	9.23579	9.38315	9.30127	9.88937	9.65931	9.76253	9.13832	9.26878	9.10322
HMGB2	-0.52335	2.26884e-05	-0.0435918	0.955158	9.6672	9.36178	9.63579	9.08054	8.9271	9.11352	9.55326	9.39233	9.60217
PBRM1	-0.602632	2.29557e-05	-0.203452	0.542673	8.33803	8.50917	8.56764	7.89897	7.84494	7.89605	8.29063	8.18497	8.33858
GAS5	0.543593	2.67896e-05	0.223107	0.437918	8.35742	8.5849	8.3688	8.92097	8.98991	9.01913	8.65354	8.53803	8.77746
SRGAP1	0.747586	2.74715e-05	0.033726	0.968698	7.62575	7.48989	7.34259	8.23382	8.03282	8.38882	7.61916	7.68102	7.23435
ENSG00000282943	0.956338	2.86584e-05	-0.193804	0.83098	6.68569	7.00784	6.22033	7.64485	7.67329	7.4703	6.28823	6.70181	6.43686
TOMM34	0.523937	2.97058e-05	0.032382	0.966556	8.6143	8.50137	8.60833	9.17128	8.99284	9.11888	8.45801	8.65962	8.69767
HNRNPDL	-0.469024	2.97058e-05	-0.216934	0.314058	9.54739	9.37037	9.59249	9.04072	9.02176	9.06153	9.26567	9.22758	9.37736
FAM83D	-0.949645	3.26137e-05	0.319796	0.495471	6.94346	6.94024	6.80283	6.10063	6.0193	5.84925	7.2232	7.24893	7.14693
S100A11	0.581168	3.53438e-05	0.097542	0.871235	8.22013	8.66735	8.41158	9.13973	8.9332	8.97544	8.53119	8.56941	8.51576
CDKN3	-0.714074	3.91787e-05	0.254993	0.502044	8.12379	8.20278	8.34491	7.55203	7.46165	7.5598	8.46981	8.1748	8.73479
CD44	0.444447	3.95494e-05	0.135836	0.661961	8.99956	9.02909	8.94661	9.42791	9.48336	9.38687	9.08815	9.08563	9.20291
LAMA1	3.58105	4.01427e-05	2.72705	NA	2.52386	2.57622	2.53835	4.73741	4.84586	4.49641	4.27861	3.82926	3.88958
LARS1	0.480877	4.01427e-05	-0.00266785	0.996856	8.94678	8.92801	8.80789	9.43265	9.24174	9.43712	8.8257	8.96696	8.88343
KIF5B	-0.484895	4.20786e-05	-0.129521	0.726047	9.89257	9.63907	9.90444	9.30659	9.2442	9.44782	9.80542	9.60027	9.65242
PLCB1	-1.06123	4.20786e-05	-0.323399	NA	6.66094	6.70253	6.87132	5.65774	5.94877	5.59588	6.54784	6.43854	6.31737
DYNLL1	-0.559344	4.32111e-05	0.0542729	0.942106	8.83505	8.95681	8.98059	8.35866	8.40184	8.35285	8.84093	8.8758	9.19325
PTMS	-0.824951	4.38245e-05	-0.304972	0.495471	7.65111	7.79425	7.80621	7.11807	6.68692	7.00943	7.5467	7.64467	7.11657
PFDN2	0.520836	4.51059e-05	0.0551235	0.938213	8.60784	8.7354	8.80789	9.34482	9.09434	9.25909	8.64662	8.77848	8.88643
MMP14	0.654542	4.63514e-05	-0.224173	0.606573	7.95589	8.39177	8.28341	9.08356	8.65909	8.83257	8.04449	8.05802	7.88963
CALM1	-0.455753	4.66938e-05	-0.0939165	0.819094	10.35	10.1941	10.3998	9.8313	9.92575	9.83114	10.127	10.1139	10.411
CRADD	1.06519	4.82167e-05	0.155453	NA	6.29325	5.78286	5.59473	6.92967	6.93816	6.95048	6.23389	5.93545	6.02218
ITGA3	0.640665	4.86566e-05	-0.0410536	0.966556	8.39167	8.6881	8.4344	9.27789	9.11596	9.03056	8.49314	8.71678	8.14158
PLK1	-0.742094	4.93606e-05	0.477841	0.0412097	7.73652	7.93403	7.85212	7.35631	6.71552	7.21376	8.26827	8.38776	8.28043
ENO1	-0.462176	5.12545e-05	-0.093166	0.83098	11.3704	11.5791	11.6845	11.1588	11.0567	11.0492	11.3224	11.3648	11.6607
IVNS1ABP	0.838146	5.15264e-05	-0.0870512	0.945141	6.54397	6.57461	6.56166	7.30551	7.51143	7.2823	6.39114	6.47212	6.5623
JARID2	0.566905	5.33363e-05	-0.00902363	0.989799	8.16399	8.11353	8.35292	8.89716	8.77573	8.64452	8.1943	8.30164	8.11623
PTTG1IP	-0.527478	5.45608e-05	-0.0160291	0.977398	8.7079	8.75192	8.82526	8.23924	8.28265	8.19926	8.75992	8.61897	8.84999
TRIM25	-0.643063	5.47537e-05	-0.143052	0.783676	7.99602	7.95131	8.07175	7.30551	7.47007	7.34772	7.86543	7.90042	7.83473
PTTG1	-0.523126	5.58256e-05	0.0308346	0.966556	8.92875	9.10308	9.07315	8.63036	8.29691	8.60684	9.08303	9.07474	9.04261
SPHK1	1.5821	5.75627e-05	0.590332	NA	4.23918	4.73243	4.27638	5.81128	5.79644	5.84925	4.76089	4.93342	5.06661
NR2F1	-1.03499	5.75627e-05	-0.47105	0.315853	6.96384	6.96313	7.39781	5.89612	6.50225	5.89999	6.75498	6.43854	6.78455
SORBS2	-1.98871	6.12888e-05	0.14458	NA	5.34961	5.29819	5.36069	3.09339	4.28343	3.48827	5.50494	5.64281	5.22678
EIF4G2	-0.388941	6.44877e-05	-0.173228	0.378434	10.1139	10.1474	10.2503	9.8096	9.76229	9.78126	9.97377	9.92223	10.0954
BRD8	-0.808785	6.77238e-05	0.0916348	0.924914	7.58027	7.34928	7.56565	6.64916	6.65773	6.83788	7.75399	7.3152	7.67029
ELK3	0.662126	7.49376e-05	-0.044296	0.966556	7.52648	7.63234	7.44351	8.34363	7.98662	8.20936	7.41451	7.43925	7.61345
PTGES	-0.525384	7.49376e-05	0.0450301	0.955158	9.2771	9.45555	9.33197	8.76052	9.07791	8.6258	9.39305	9.45876	9.34935
TM4SF1	0.606637	8.58185e-05	0.0499542	0.966556	8.32627	7.91655	8.28759	8.81601	8.66643	8.88073	8.26376	8.06353	8.37323
NCAPD2	-0.60899	9.38854e-05	0.00420069	0.995068	8.27418	8.23605	8.29176	7.61179	7.47007	7.88979	8.31264	8.23473	8.26667
PLXNA1	-0.9589	9.46157e-05	-0.485599	NA	6.80346	6.89335	7.06894	5.81128	6.10828	6.08677	6.57724	6.40415	6.38686
H1-2	-0.502826	9.46885e-05	-0.63815	1.9874e-06	10.6582	11.09	10.6695	10.3442	10.2258	10.3803	10.057	10.3112	10.1712
HEXIM1	-0.785266	0.000102321	-0.109815	0.901956	7.54689	7.24108	7.65253	6.78885	6.56647	6.82481	7.38156	7.41355	7.36062
PSAP	0.429961	0.00010627	0.131939	0.686346	10.3236	10.4352	10.4256	10.8566	10.9806	10.612	10.483	10.4588	10.6328
ENSG00000289609	-3.44641	0.000108363	-1.01253	NA	4.78874	4.563	4.91809	2.64789	2.82674	2.33105	3.95943	3.34035	4.3732
CA9	-1.26744	0.000116461	-0.119158	NA	6.32511	6.14501	6.58903	5.15967	5.59565	4.68181	5.9934	6.29579	6.43686
CCDC88A	-0.557036	0.000131074	-0.159883	0.714842	9.0881	8.6743	9.05117	8.27664	8.50376	8.40647	8.84396	8.75139	8.78069
NAMPT	0.435621	0.000132546	-0.16457	0.563238	9.18894	9.13114	9.20725	9.49971	9.75198	9.56249	9.02287	9.06376	8.95095
OAF	0.648589	0.000134705	0.104814	0.896311	7.39756	7.31411	7.36651	8.08515	7.97484	7.92696	7.32202	7.41355	7.63503
TRIO	0.612235	0.000134705	0.403372	0.0948928	8.66808	8.40854	8.27922	9.0345	9.06408	9.10543	8.99863	9.02186	8.50798
ERCC2	0.961239	0.000135454	0.150837	NA	6.15827	6.06263	5.7483	6.81813	6.9976	6.92621	6.17742	6.27691	5.95514
SCD	-0.588166	0.000146017	-0.31036	0.265425	9.45141	9.39372	9.65534	8.94772	8.71328	9.07815	9.36382	8.8632	9.30965
LRP5	-0.869382	0.000159045	0.00124143	0.999114	7.10817	7.20313	7.06894	6.54791	6.27129	6.01953	7.27794	6.93645	7.14693
TNS2	-1.40503	0.000161064	-0.424519	NA	5.68038	6.08367	5.95176	4.46858	4.73846	4.73866	5.44242	5.64281	5.47031
SYNJ2	-0.536088	0.000168794	-0.0398794	0.966556	8.59809	8.41685	8.68009	8.00465	8.04976	8.06675	8.60797	8.43109	8.54645
CRACR2B	-1.3106	0.000173003	-0.37041	NA	5.92869	6.31477	6.23773	5.20471	5.08386	4.56089	5.67774	6.09485	5.65064
CTNNB1	-0.513663	0.000174464	-0.0249256	0.968255	8.57509	8.53613	8.70844	8.14993	8.02141	8.13188	8.63967	8.51808	8.5913
EIF2AK4	0.564413	0.000176125	0.015152	0.983604	7.73058	7.68147	7.77079	8.36363	8.21914	8.26848	7.77951	7.77147	7.67724
NDC80	-0.827192	0.000185537	-0.117063	0.907213	7.51271	7.19349	7.33453	6.49449	6.32796	6.79831	7.20448	7.07405	7.41983
NOP56	-0.46142	0.000187844	0.0387557	0.961854	9.23788	9.37677	9.11846	8.66704	8.87416	8.81615	9.28138	9.33872	9.23624
KLF3	0.966795	0.000199803	0.185374	NA	5.82109	5.88227	5.84228	6.88885	6.68692	6.71575	5.94911	5.91116	6.18708
MCM3	-0.530111	0.000223025	-0.327249	0.138891	8.56512	8.44558	8.5745	8.04855	8.07758	7.88979	8.11133	8.23473	8.27127
RTN4	0.367041	0.000257716	-0.0135686	0.975092	10.3008	10.1758	10.4575	10.6765	10.7469	10.6214	10.3241	10.2677	10.3163
DOCK9	0.977777	0.00027444	0.161007	NA	6.29325	5.85805	5.88708	6.91619	6.86344	7.09901	6.35764	6.35099	5.75944
CORO1C	0.560271	0.000276967	-0.135832	0.810829	7.82274	8.13385	8.11475	8.5099	8.6066	8.6258	7.93521	7.72348	8.01013
TUBB6	-0.520469	0.000314801	0.413304	0.0169319	8.54497	8.6392	8.73319	8.22838	7.97484	8.16855	8.91476	9.04157	9.18352
ANP32E	-0.621235	0.000315779	-0.258165	0.494713	8.20309	8.00743	8.03241	7.54329	7.36565	7.51167	8.00717	7.81138	7.64924
HYI	0.701493	0.00032786	0.0268124	0.975092	6.90181	7.32298	7.07863	7.75496	7.95698	7.65149	7.1566	7.21957	7.02146
IL6R	2.3617	0.000384759	0.0601948	NA	4.09878	2.31669	3.36909	5.55712	5.2495	5.08407	3.42508	2.82054	3.98229
NUF2	-0.635113	0.000384759	0.0464761	0.966556	7.92503	7.99638	7.9291	7.30551	7.06584	7.56766	8.05498	7.8818	8.04279
KLHL5	-0.472635	0.000405735	-0.135247	0.743919	8.84057	8.87167	8.80789	8.32335	8.49965	8.28288	8.76632	8.5925	8.75135
PKM	-0.424061	0.000413966	0.0542455	0.927105	10.7149	11.1278	10.8725	10.5995	10.4466	10.4232	10.8758	11.0619	10.9629
VPS25	0.947213	0.000492464	0.182044	NA	5.96958	5.80836	5.6989	6.91619	6.56647	6.68715	5.90341	6.11626	5.97783
DDX46	-0.614602	0.000495253	-0.278137	0.457733	9.6166	9.06656	9.05609	8.74154	8.53218	8.70641	9.0907	9.12575	8.74143
ATP6V1F	0.670568	0.000529334	0.241076	0.639975	6.8259	6.97444	6.87132	7.64485	7.50326	7.47867	7.09695	7.15899	7.11657
CREM	0.909037	0.000553004	0.102344	NA	6.08573	6.08367	5.93052	6.91619	6.87617	6.91391	6.45588	5.83577	6.02218
SLC2A1	-0.543133	0.000561686	0.0234173	0.971551	8.24533	8.34461	8.30007	7.62012	7.92059	7.72368	8.32569	8.20008	8.4237
HMGA1	0.354968	0.000567807	-0.152786	0.502044	11.1689	11.4004	11.402	11.8125	11.6113	11.6139	11.0942	11.2203	11.2076
FOXM1	-0.695317	0.000580699	-0.0156349	0.985801	7.44907	7.49774	7.35061	6.78885	6.81139	6.67263	7.38156	7.28717	7.56929
MYO10	0.5859	0.000599261	0.135814	0.83098	7.51961	7.40049	7.35061	8.10904	7.86422	8.02164	7.5978	7.55348	7.52375
MFGE8	0.926561	0.000617076	0.244726	NA	5.68038	5.92952	5.90896	6.74377	6.59754	6.81162	6.07809	5.88647	6.22552
TMC6	-0.889159	0.000618821	-0.332159	NA	6.74578	6.8325	6.80283	5.86839	5.84903	6.10851	6.50259	6.27691	6.62115
YWHAZ	-0.492357	0.000622117	-0.0551528	0.941398	8.54834	8.64982	8.7962	8.05472	8.30635	8.16855	8.61862	8.65232	8.56905
RRAS2	0.888634	0.000721067	0.378077	NA	6.14047	5.95257	5.90896	6.98236	6.74357	6.82481	6.62024	6.15813	6.26297
CCNA2	-0.756565	0.000725799	0.061983	0.966556	7.16208	7.52876	7.22538	6.45775	6.45214	6.79831	7.3648	7.23921	7.50042
TGFA	-1.14227	0.000730683	-0.208826	NA	6.12246	6.06263	6.44667	5.411	5.0393	5.03951	5.88001	6.29579	5.8606
RABEP1	0.516739	0.000731407	0.113898	0.843328	8.27009	8.20278	7.9291	8.60958	8.75865	8.57986	8.13128	8.33397	8.28953
DNPH1	0.561127	0.000738609	0.0403243	0.966556	7.4706	7.88693	7.78269	8.32845	8.23898	8.25392	7.72145	7.74424	7.81596
BCCIP	0.423925	0.000753239	0.126321	0.757593	8.99709	9.13114	9.05117	9.59373	9.2972	9.53868	9.12096	9.28067	9.15143
MKNK2	-0.710742	0.000756201	-0.270913	0.577985	7.51271	7.45801	7.63294	6.6162	7.05469	6.82481	7.14683	7.16927	7.47672
CAVIN3	-0.851313	0.000758454	-0.137228	0.897005	6.94346	7.3318	7.4132	6.56529	5.94877	6.65797	7.10707	6.96032	7.24375
TNFAIP3	1.24972	0.000763664	0.430527	NA	4.96085	4.73243	4.78241	5.97625	6.12969	5.74209	5.30859	5.27531	5.02362
RPL18	0.354913	0.000763664	0.150031	0.531803	11.2238	11.6025	11.4684	11.7891	11.8282	11.764	11.5507	11.5639	11.6514
CDCA8	-0.722473	0.000763664	0.479097	0.107392	7.93539	7.72898	7.72217	7.10625	6.71552	7.38382	8.46589	7.96081	8.33858
DHRS2	-2.10159	0.000763664	0.0260346	NA	4.87736	5.22433	4.52337	3.27333	3.48812	3.19514	5.12171	4.78097	4.83761
VAT1	0.521009	0.00078019	-0.0503149	0.961854	7.82274	7.92823	8.01233	8.56708	8.44091	8.29241	7.80458	7.90042	7.91337
TMBIM6	0.415657	0.000789366	0.108885	0.796693	9.13828	9.29344	9.30746	9.81868	9.54841	9.60517	9.24521	9.3769	9.44
ZMIZ1	-0.903824	0.000794177	-0.102352	NA	6.62299	6.91698	6.99924	6.17042	5.87462	5.9247	6.68918	7.02963	6.50094
PXDN	-0.520288	0.000827451	-0.491881	0.00773484	8.5142	8.58121	8.88445	8.13836	8.25368	8.06675	8.23637	8.15942	8.1516
OIP5	-1.08533	0.000832715	0.0853704	NA	6.35628	6.01961	6.46155	5.2484	5.16906	5.43315	6.35764	6.07313	6.6355
CLMP	0.863915	0.000841047	0.237681	NA	6.38679	6.29686	6.01367	6.83255	7.3291	6.99783	6.48719	6.65871	6.22552
PYCR1	0.907574	0.000850865	0.543967	NA	5.92869	5.88227	6.07303	6.64916	7.0769	6.71575	6.15809	6.64405	6.59203
SBDS	0.625335	0.000850865	0.237015	0.629642	7.1883	6.97444	7.14468	7.653	7.65125	7.83868	7.38986	7.23921	7.37779
TMC8	-1.6811	0.000850865	-1.07686	NA	5.34961	5.46782	5.45296	4.54063	3.615	3.73179	4.53981	4.48449	4.4401
DUSP4	-0.503386	0.000855292	-0.223769	0.495373	8.69271	8.66386	8.84526	8.37845	8.30635	8.01014	8.60441	8.53407	8.39869
KIF11	-0.690838	0.000909899	-0.0104013	0.991511	7.56033	7.50556	7.22538	6.74377	6.65773	6.88901	7.47041	7.48932	7.31678
HSPD1	-0.342821	0.000932252	0.0197719	0.968255	10.4536	10.1904	10.3234	9.99573	9.96351	9.99763	10.3991	10.3182	10.3218
FXYD5	0.730948	0.0009446	-0.0583808	0.966556	6.50277	6.78191	6.80283	7.43403	7.2433	7.53593	6.45588	6.78434	6.6777
EFNA5	-0.685306	0.000967668	0.0175167	0.984584	7.78886	7.57407	7.77079	6.98236	7.29159	6.82481	7.95773	7.68819	7.51601
DDX21	0.316902	0.000984977	0.123133	0.609263	10.659	10.4745	10.7004	10.9514	10.8713	10.9698	10.7337	10.6976	10.7813
ADAM8	-0.596606	0.00103335	-0.299295	0.400508	8.60784	8.87469	8.98317	8.5233	8.19903	7.94519	8.32135	8.55381	8.70108
SKA2	-0.555653	0.00103927	-0.290117	0.354079	8.11014	7.96837	8.09102	7.34629	7.55165	7.62157	7.7921	7.69531	7.8285
PROCR	0.862269	0.00110063	0.0812802	NA	6.2441	5.92952	5.97269	6.68139	7.09878	6.82481	6.07809	6.11626	6.20643
SAMD9	-1.28709	0.00111885	-0.322418	NA	5.68038	5.64812	6.05351	4.79746	4.6816	4.49641	5.47402	5.67201	5.37093
AKR1B1	-0.491708	0.00112184	0.146797	0.755553	9.25245	9.40839	9.48003	8.99977	8.77573	8.90267	9.39718	9.34553	9.79982
UGP2	-0.718815	0.00112391	-0.18838	0.783676	7.27242	7.41716	7.42084	6.63277	6.58209	6.79831	7.43873	6.98379	7.09597
TGFBR3	-1.25365	0.00115989	-0.155981	NA	5.68038	5.97527	5.97269	4.73741	4.56069	4.94603	6.01504	5.42001	5.70606
ITGB1-DT	1.06739	0.00117888	-0.0453996	NA	5.63026	5.53046	5.1563	6.23699	6.65773	6.41797	5.59393	5.5515	5.02362
DYRK2	0.985756	0.00120722	0.238278	NA	5.31829	5.56078	5.59473	6.56529	6.30932	6.36478	5.73103	5.78322	5.62211
RGS10	0.595954	0.00120722	-0.0905183	0.924914	7.63214	7.39208	7.81782	7.99185	8.25855	8.35739	7.55411	7.41355	7.63503
S100A16	0.468345	0.00125762	-0.125873	0.803361	8.05421	8.17364	8.25806	8.7223	8.56791	8.58762	8.01793	8.10159	7.99908
NIBAN2	-0.343724	0.00126963	-0.289774	0.0327872	9.81476	9.95385	9.96967	9.61474	9.57402	9.52662	9.58978	9.69576	9.58933
DEPDC1	-0.782125	0.00126963	0.434872	0.262705	7.13538	6.82002	7.15387	5.95003	6.25189	6.59777	7.46256	7.38739	7.55427
TMPO	-0.500062	0.00127604	-0.0653127	0.928762	8.55171	8.45368	8.5745	8.25003	7.83193	7.99855	8.42605	8.42253	8.53884
MARCHF4	1.3375	0.00129947	-0.535446	NA	4.83373	4.43787	4.63263	5.89612	5.79644	5.8232	4.04609	4.54886	3.98229
CYLD	0.850672	0.00129947	-0.0942474	NA	5.84326	6.33245	6.32171	7.08231	6.87617	7.02094	6.15809	5.80973	6.26297
CAMLG	0.593933	0.00129947	0.133664	0.853812	7.41986	7.46605	7.7648	8.03614	8.18886	8.19419	7.47823	7.65201	7.90747
H2AX	-0.795411	0.00129947	-0.655067	0.0373386	6.89121	7.22223	7.49506	6.54791	6.43504	6.38272	6.47162	6.59915	6.6915
TAOK3	0.427993	0.00130643	-0.0450959	0.955158	8.99709	8.80673	8.85092	9.40155	9.17894	9.35085	8.90899	8.92816	8.68047
BCL9L	-0.562267	0.00133631	-0.416065	0.0948928	8.88132	8.86257	8.83672	8.5099	8.13164	8.24904	8.38508	8.7548	8.14158
TNIP1	-0.496331	0.00138476	-0.046708	0.961854	8.57177	8.56634	8.81949	8.30278	8.19903	7.98686	8.71103	8.61897	8.49624
AARS1	0.571311	0.0013889	0.220086	0.635151	7.37491	7.25969	7.38224	7.97894	7.8122	7.90849	7.486	7.45613	7.7115
CCDC34	-0.680316	0.00141045	-0.148154	0.841683	7.61934	7.21271	7.46583	6.66537	6.95025	6.71575	7.31331	7.30592	7.28073
RPS3	0.307663	0.00144722	0.154089	0.438806	12.5302	12.8112	12.5695	12.9498	12.98	12.9187	12.7579	12.7506	12.8767
PROSER2	0.803061	0.00147302	0.250566	NA	6.12246	6.24177	6.23773	7.22033	6.82458	6.83788	6.48719	6.52108	6.29946
SERPINE2	0.668807	0.00147302	0.115029	0.908488	6.91234	7.2689	7.19007	7.97894	7.83845	7.49526	7.12708	7.16927	7.41152
KNL1	-0.863982	0.00147352	0.175028	NA	6.89121	6.71607	6.82602	5.48591	5.94877	6.38272	7.03474	6.87501	7.03234
PLAC8	-0.712778	0.00148459	-0.223899	0.726047	7.25598	7.174	7.19898	6.53033	6.68692	6.32819	6.9132	7.12772	6.93131
PFKFB4	-0.91409	0.00148459	0.249553	NA	6.63575	6.52933	6.46155	5.48591	5.87462	5.65615	6.8782	6.96032	6.46926
PAK1	0.683636	0.00148741	0.018223	0.985801	6.97393	6.76898	6.90438	7.66111	7.70929	7.24353	6.86634	6.99539	6.84752
LMNB1	-0.606905	0.00149616	-0.0441867	0.966556	7.61934	7.57407	7.61973	7.04563	6.95025	7.04368	7.64715	7.6224	7.40316
C15orf48	-0.746471	0.00149664	0.129663	0.89625	7.35189	7.6676	7.7945	6.88885	7.19333	6.50248	7.486	7.75792	7.94827
AHNAK	-0.533321	0.00152378	-0.543818	0.00549868	9.00449	8.59958	8.92529	8.29759	8.41933	8.25879	8.51988	8.32481	8.06945
LXN	-2.14466	0.00152668	-0.689289	NA	5.11461	4.78476	4.63263	3.09339	3.615	3.02271	3.86723	4.41712	4.50405
VPS37B	0.782845	0.00153981	0.223322	0.783676	6.22734	6.96313	6.53376	7.47138	7.1096	7.4703	6.83017	6.70181	6.90786
EPG5	0.893747	0.00155687	0.190504	NA	5.79857	6.10441	5.64776	6.53033	6.83765	6.72984	6.03637	6.19882	5.8606
ANXA3	1.07305	0.00156385	0.285069	NA	5.31829	5.0642	5.45296	6.10063	6.2123	6.50248	5.47402	5.27531	5.83597
VEZF1	-0.648162	0.00158428	-0.515366	0.0576831	7.51271	7.53641	7.75275	7.02066	6.95025	6.95048	7.03474	6.93645	7.30785
OGFOD1	0.577649	0.00159421	0.0851025	0.924914	7.36728	7.68836	7.40552	8.13836	7.85782	8.16337	7.47041	7.65201	7.59888
FOSL2	-0.628381	0.0016263	-0.0668916	0.95155	7.50578	7.47404	7.4132	6.87498	6.97412	6.70152	7.38156	7.43925	7.37779
AK4	-0.905205	0.00162881	-0.44081	NA	6.63575	6.61852	6.97869	6.19296	5.68515	5.76964	6.19649	6.56843	6.20643
NRBP1	0.634578	0.00163542	0.202027	0.757593	6.85893	7.10365	7.03948	7.74737	7.55956	7.55189	7.11711	7.38739	7.07507
TUT7	0.71512	0.00165702	0.228384	0.757593	6.86977	6.33245	6.7553	7.43403	7.39247	7.2727	6.83017	6.77091	7.06451
HNRNPU	-0.370678	0.00165702	-0.287265	0.080208	9.83841	9.65848	9.7599	9.45146	9.35743	9.34857	9.58978	9.46919	9.33624
H2AZ1	-0.44272	0.00165702	-0.0783361	0.897277	10.1599	9.93949	10.2167	9.62927	9.69386	9.68509	9.86623	9.88375	10.304
ZNF292	-0.706903	0.00165702	-0.189696	0.783772	7.59342	7.23169	7.43599	6.45775	6.87617	6.85084	7.35634	7.32442	7.03234
LTBP3	-1.05331	0.00167186	-0.454594	NA	6.12246	6.57461	6.65527	5.97625	5.16906	5.16927	5.97142	6.05108	6.08625
JUND	0.603744	0.00170119	-0.54323	0.0387009	7.32063	7.73565	7.78269	8.25003	8.17863	8.22933	6.84233	7.33359	7.07507
NMI	-0.966683	0.00170119	-0.216042	NA	6.44595	6.38425	6.60252	5.68979	5.12709	5.8232	6.17742	6.13734	6.48519
SRSF2	-0.554374	0.00170576	-0.10221	0.89243	8.76127	8.46575	8.59827	7.99185	8.15271	8.05	8.43008	8.24448	8.80627
UBN1	-0.5081	0.00171269	0.00830139	0.991182	8.64618	8.35763	8.44567	8.07911	7.96296	7.92083	8.56826	8.61522	8.28953
ENSG00000254682	1.15685	0.00173385	0.466405	NA	4.7423	5.10593	5.1563	6.25852	6.04207	5.87484	5.12171	5.75621	5.33622
RASAL2	0.612985	0.00175068	0.0544646	0.966556	7.33634	7.20313	6.96831	7.69307	7.75134	7.87718	7.1663	7.39616	7.11657
BRI3BP	-0.624465	0.001824	-0.336137	0.362855	7.87748	7.5962	7.57936	7.10625	7.21353	6.91391	7.25992	7.47282	7.35196
LURAP1L-AS1	1.46553	0.00188265	0.417895	NA	4.83373	3.78855	4.6843	5.62498	5.94877	5.8232	4.85991	5.34947	4.15156
CDCA2	-0.783126	0.00188639	0.0206043	NA	6.92279	6.92866	6.74317	6.002	5.92447	6.38272	6.90163	6.8624	6.89599
SMTN	0.936044	0.00188747	-0.107497	NA	5.65554	5.70353	5.95176	6.92967	6.29043	6.70152	5.62241	5.78322	5.62211
SLCO4A1-AS1	-0.990178	0.00188747	-0.340034	NA	6.27705	6.68886	6.58903	5.75181	5.71379	5.28832	5.78242	6.31442	6.43686
SHROOM2	-1.85039	0.00188809	-0.588487	NA	5.18575	4.78476	5.1563	3.09339	4.12187	3.34914	4.53981	4.66958	4.4401
MROH1	1.31973	0.0019129	0.472677	NA	4.53997	4.50179	4.34221	5.72113	5.65593	5.4672	4.81125	4.98086	4.7871
TES	-0.548131	0.00201779	-0.111549	0.867887	7.79456	7.88693	7.94508	7.26355	7.36565	7.38382	7.88319	7.7511	7.65629
BASP1	0.373444	0.00226518	0.189819	0.457733	8.96206	9.1159	9.13944	9.49744	9.4582	9.37795	9.14078	9.29482	9.34499
IER2	-0.577268	0.00226518	-0.30674	0.386772	7.61291	7.72898	7.72834	7.11807	7.19333	7.06607	7.34784	7.3152	7.50042
UACA	-0.434742	0.00226742	-0.32495	0.110386	9.00203	8.76175	8.95452	8.34363	8.46638	8.61446	8.61153	8.62645	8.52734
CCAR1	-0.431139	0.00234718	0.0906565	0.864716	8.95952	8.64275	8.77252	8.32845	8.35261	8.43255	8.90899	8.9099	8.84691
TAF1D	0.472606	0.00241732	0.236736	0.485165	8.20309	7.97964	8.12881	8.59696	8.3752	8.73114	8.317	8.35663	8.35167
DNAH11	-1.92355	0.00241732	-0.365556	NA	4.59327	4.93123	5.08118	3.09339	3.83952	3.19514	4.59834	4.54886	4.56527
DUSP5	0.47761	0.00256209	-0.605929	0.000721691	8.50032	8.48169	8.83387	9.24322	9.11059	8.89331	7.94651	8.11759	7.98234
FAM111A	-0.729394	0.00256209	-0.0641227	0.966556	7.22254	7.14427	7.06894	6.54791	6.2123	6.55091	6.99172	6.87501	7.34324
OCIAD2	0.659217	0.00260007	-0.0151972	0.988168	6.93316	6.86932	7.28518	7.6034	7.81881	7.62157	6.93608	6.81083	7.28983
GNPNAT1	0.545592	0.00265426	0.380372	0.191852	7.23097	7.30518	7.19898	7.78493	7.8706	7.67353	7.59061	7.68102	7.57675
HDAC1	-0.529278	0.00269737	0.037419	0.966556	7.96603	8.24541	7.95036	7.57794	7.57525	7.46188	8.04974	8.00163	8.22458
AMN1	1.45422	0.00276831	0.222087	NA	4.36711	3.98025	4.27638	5.59144	5.46698	5.32591	4.65458	3.92937	4.50405
EZH2	-0.582771	0.00276831	-0.0481384	0.966556	7.92503	7.62518	7.75275	6.95626	7.28206	7.33856	7.80458	7.71649	7.65629
SLC37A2	-0.813557	0.00277466	-0.238674	NA	6.80346	6.5894	6.7553	5.84011	6.19209	5.76964	6.51783	6.40415	6.5472
CALU	0.439943	0.00281322	0.0145448	0.983604	8.95952	9.25222	9.09001	9.74053	9.27575	9.57426	9.05979	9.15189	9.14393
NPTN	-0.681011	0.00284944	-0.230318	0.715223	7.22254	7.2962	7.45099	6.75895	6.81139	6.40045	7.05578	6.94844	7.28073
ACOX2	-1.88655	0.00287459	-0.309201	NA	4.69431	4.97693	4.87427	3.27333	3.615	3.34914	4.85991	4.48449	4.3732
PKIG	0.624715	0.00293201	0.219839	0.729011	6.91234	6.82002	6.7186	7.55203	7.3291	7.39271	7.10707	7.06307	6.91963
SLC2A4RG	-0.585171	0.00293201	-0.382508	0.235049	7.8935	8.17854	7.96611	7.48969	7.4188	7.41904	7.3732	7.58452	7.91337
ADD3	-0.717452	0.00293201	0.0225393	0.983604	6.86977	7.30518	7.0094	6.23699	6.3825	6.50248	7.14683	7.02963	7.09597
AOPEP	-0.891606	0.00299509	0.324912	NA	6.76913	6.43425	6.40107	5.72113	5.68515	5.71401	7.06618	6.98379	6.45315
CSF1	-1.01875	0.00300494	-0.15324	NA	6.02882	6.26037	6.32171	5.55712	5.16906	5.03951	6.32335	6.02868	5.7854
BCL2L1	0.453413	0.00310795	-0.0429571	0.966556	7.8667	8.06146	7.97651	8.44097	8.46638	8.33912	7.88906	7.94296	7.94827
CD55	0.788483	0.00311266	0.247535	NA	6.00935	6.08367	6.09229	6.54791	6.88878	6.96246	6.17742	6.38665	6.31737
E2F7	0.715968	0.00311631	-0.139933	0.897005	6.76913	6.89335	6.44667	7.62012	7.26281	7.32005	6.4076	6.43854	6.84752
TROAP	-0.939809	0.00313812	0.504189	NA	6.08573	6.46664	6.01367	5.48591	5.36233	5.1273	6.662	6.65871	6.7187
S100A10	-0.457074	0.0032689	-0.325693	0.175668	9.00203	9.14871	9.45235	8.73388	8.75176	8.79285	8.9032	8.71678	9.0318
NQO1	-0.522949	0.00333855	0.112306	0.862933	8.00589	8.04546	8.2409	7.62012	7.45318	7.6808	8.34718	8.01309	8.25277
ADAMTS15	-1.67426	0.00339306	-0.29011	NA	4.69431	5.0642	5.36069	3.8282	3.48812	3.83969	4.81125	4.98086	4.62401
PLEKHO1	0.664979	0.0034032	0.144736	0.877646	6.50277	6.68886	6.58903	7.26355	7.28206	7.16273	6.81791	6.52108	6.83515
EPS8	0.820582	0.00345582	-0.0980552	NA	6.17585	6.1845	6.27191	7.20932	7.1096	6.61305	6.4076	6.05108	5.83597
ALKBH5	-0.45747	0.00345582	-0.14394	0.762695	8.24116	8.33587	8.34089	7.85725	7.81881	7.88979	8.07056	8.14908	8.26667
DDB2	-1.01622	0.00345582	-0.357326	NA	6.06701	6.10441	5.99333	5.2908	4.94582	5.1273	5.70463	5.72868	5.733
TMBIM1	0.805348	0.00352027	0.176339	NA	5.94928	5.7569	6.22033	6.68139	6.79808	6.78487	6.03637	6.33282	6.08625
WARS1	0.59882	0.00352325	0.0983744	0.924914	6.96384	6.94024	7.05918	7.51674	7.5437	7.65149	6.95859	7.29657	6.97709
LRRC8A	0.599869	0.00356043	-0.0462808	0.966556	6.83699	7.18378	6.99924	7.49877	7.62133	7.65887	6.84233	7.00689	7.04314
EHD1	-0.514383	0.00363897	-0.343817	0.233101	8.04467	8.36194	8.3247	7.85725	7.76509	7.59871	7.76681	8.02445	7.93092
KPNB1	-0.284094	0.0036578	-0.151706	0.437144	10.6218	10.4635	10.5989	10.3391	10.2687	10.2323	10.4326	10.367	10.4358
ITGA6	0.436478	0.00371381	-0.210006	0.538982	8.3302	8.24074	8.60499	8.80508	8.82579	8.86804	8.19904	8.27335	8.10597
PHF19	-0.57222	0.00371381	0.0149074	0.985801	7.54689	7.58148	7.78861	7.00801	7.02071	7.21376	7.53176	7.74424	7.69104
ZNF770	-0.778166	0.00371381	-0.155342	NA	6.81472	6.86932	6.77926	5.75181	6.3825	6.01953	6.54784	6.68759	6.77162
PGM2L1	0.849452	0.00373358	0.133182	NA	5.79857	5.67609	5.99333	6.83255	6.6724	6.36478	5.88001	5.91116	6.06521
ZFYVE28	-0.805358	0.00373611	-0.119217	NA	6.848	6.51391	6.76733	5.68979	5.99617	6.12992	6.68918	6.68759	6.42038
SEZ6L2	0.520714	0.0037654	-0.0751454	0.934676	7.53331	7.71557	7.70351	8.30795	8.17863	7.99272	7.42263	7.73735	7.5618
BEND7	0.96019	0.00377396	0.432959	NA	5.84326	5.61959	5.26211	6.32123	6.3825	6.7438	6.3406	5.88647	5.67862
DGKI	1.96201	0.00381733	0.503347	NA	3.34044	3.56742	3.36909	5.06512	4.84586	4.84607	4.04609	4.1109	2.79726
KIF4A	-0.709983	0.00387446	0.338292	0.481125	7.02332	6.86932	7.04936	6.45775	6.10828	6.32819	7.53176	7.16927	7.2058
WIPI1	0.810835	0.00389402	-0.0184055	NA	5.84326	5.83342	6.16684	6.87498	6.61282	6.68715	5.78242	6.00593	6.02218
SOX4	-0.648589	0.00397319	-0.45114	0.198301	7.3127	7.49774	7.72217	6.91619	6.79808	6.95048	7.31331	7.0183	6.87196
PHACTR1	0.862195	0.00397781	0.123934	NA	5.72883	5.7569	5.6989	6.32123	6.75739	6.50248	5.92644	5.91116	5.67862
SNRNP27	0.514596	0.00401161	0.0330555	0.968255	7.53331	7.69521	7.67186	8.00465	8.14221	8.25879	7.6814	7.4645	7.8285
EIF3D	0.317425	0.00409636	-0.0518144	0.924914	9.42041	9.38739	9.40886	9.75006	9.72761	9.6869	9.30574	9.29482	9.45626
CKAP2	-0.610384	0.00409636	0.292628	0.493225	7.61291	7.52876	7.5166	6.90258	6.70129	7.22375	8.01793	7.81138	7.67029
SPRY1	-1.28285	0.00410233	-1.11858	NA	5.49675	5.85805	5.53969	4.67475	4.62241	4.2051	4.65458	4.66958	4.62401
S100A2	-0.985931	0.00410242	-0.280895	NA	6.27705	6.22293	6.16684	5.01541	5.39807	5.4672	6.28823	5.72868	5.7854
BCL7A	0.927768	0.00423875	0.0546373	NA	5.8651	5.78286	5.67356	6.78885	6.71552	6.43527	6.07809	6.07313	5.14892
PRSS3	0.813685	0.0042702	0.128548	NA	5.8651	5.88227	6.18489	6.59943	7.02071	6.61305	6.23389	6.09485	5.97783
COG1	0.796447	0.00434322	-0.0281499	NA	6.00935	5.90609	5.90896	6.64916	6.79808	6.64315	5.92644	6.09485	5.70606
ANO10	0.598074	0.00434322	0.199478	0.765301	6.85893	7.0188	6.94731	7.50778	7.44466	7.61399	7.14683	7.3152	6.91963
SHMT2	0.468119	0.00434322	0.0763494	0.924914	7.77739	7.85057	7.80036	8.23382	8.35261	8.21938	7.82923	7.76471	8.04279
NPC1	0.548195	0.00435397	0.229186	0.635151	7.72462	7.61076	7.23408	8.1614	7.91444	8.14245	7.87729	7.75792	7.64215
PCM1	-0.525927	0.00435397	-0.216943	0.628567	8.33412	8.0347	8.16108	7.61179	7.62133	7.75847	8.18	7.95489	7.73833
IRS1	-0.742763	0.00440907	-0.131558	NA	6.93316	6.99679	6.7186	6.05216	6.15079	6.30955	6.74206	6.55282	6.95438
CRTAP	0.394625	0.00444457	-0.16931	0.629773	8.77864	8.9396	8.6896	9.26996	9.2442	9.06987	8.51229	8.72725	8.66657
ETV6	-0.729084	0.00444457	-0.21684	0.780495	7.28867	7.1241	6.94731	6.45775	6.43504	6.38272	7.21387	6.88751	6.57724
MSMP	-1.68102	0.00444457	-0.736217	NA	5.11461	4.563	5.51135	3.8282	3.73162	3.73179	4.41512	4.27212	4.73476
UBE2C	-0.502346	0.00446087	-0.159609	0.768769	8.46857	8.75848	8.56074	8.3131	7.7989	8.15817	8.33863	8.38335	8.5913
PHLDA1	-0.337175	0.00446764	-0.17668	0.466332	9.81054	9.82078	9.85033	9.50872	9.55238	9.41112	9.54585	9.58116	9.8125
TARS1	0.288742	0.00451882	0.0221581	0.966556	9.79356	9.83325	9.92069	10.1833	10.0795	10.1495	9.84373	9.86807	9.90422
IGFN1	0.985829	0.00475838	0.30818	NA	5.38026	5.7569	4.96063	6.34154	6.29043	6.30955	5.62241	5.98282	5.37093
CEP55	-0.399007	0.00475838	0.0554785	0.934676	9.13604	9.1005	8.88445	8.76052	8.49965	8.67762	9.18442	9.072	9.03722
DBI	-0.438872	0.0047764	-0.0758712	0.913397	8.81835	8.63208	8.88445	8.30278	8.35715	8.38437	8.68763	8.51405	8.8954
CDC20	-0.563603	0.00481702	0.302387	0.40989	7.79456	7.87492	7.6064	7.3362	6.88878	7.36589	8.10629	7.93696	8.12643
GNL3	0.399641	0.00485488	0.0262291	0.968255	8.73779	8.70856	8.69276	9.21872	8.8678	9.21719	8.71103	8.77176	8.73479
PPFIBP1	0.458561	0.00504021	-0.200363	0.633997	7.74831	7.70203	7.78269	8.20639	8.12099	8.25879	7.56149	7.54561	7.53909
RFTN1	0.569719	0.00506337	-0.0305533	0.971556	7.17962	7.2689	6.95785	7.66917	7.7989	7.61399	6.96972	7.07405	7.27157
SMAD3	-0.585274	0.0050667	0.0268727	0.973018	7.58027	7.86887	7.48781	6.81813	7.25309	7.13122	7.69487	7.6149	7.72498
ENO2	-0.496239	0.00510551	-0.238063	0.521571	7.94054	8.00192	7.99709	7.46213	7.61375	7.39271	7.64715	7.71649	7.86549
CALM3	-0.371715	0.00530768	-0.184776	0.502044	9.24415	9.23117	9.41461	9.01566	8.92404	8.8488	9.0779	9.00761	9.25029
TCF7L2	-0.500382	0.00531014	-0.0907741	0.906813	7.99107	8.06146	7.93977	7.61179	7.42747	7.47867	7.88319	8.07451	7.75157
PDGFA	-0.680926	0.00536026	-0.14873	0.867887	7.03299	7.18378	7.44351	6.87498	6.30932	6.48597	7.10707	7.05201	7.09597
LINC00702	1.68185	0.00544047	0.201814	NA	3.94324	3.68222	3.60188	4.91055	5.53275	4.73866	3.54896	4.02299	4.06941
PFKFB3	-0.541723	0.00544047	-0.271231	0.495471	7.65738	7.56661	7.80621	7.12979	7.19333	7.13122	7.38156	7.34269	7.51601
CHMP4B	0.382342	0.00544122	-0.145683	0.712807	8.86244	9.10565	9.00873	9.5199	9.21445	9.37571	8.78218	8.92816	8.83763
MYC	1.40196	0.00548291	-0.190643	NA	3.85869	4.22713	4.57903	5.44894	5.53275	5.36255	4.41512	4.02299	3.7905
SVIL	-0.720468	0.00555057	-0.361865	0.495471	6.98394	7.19349	7.20784	6.47624	6.50225	6.32819	7.10707	6.72985	6.42038
SPDEF	-2.11666	0.00561593	0.174361	NA	4.36711	4.62172	4.46547	2.88777	3.34899	2.82684	4.27861	4.61048	4.93361
HMGN2	-0.68855	0.00566263	-0.15895	0.862933	7.14433	7.05121	7.0195	6.27972	6.29043	6.62818	6.74206	6.83685	7.14693
NIBAN1	0.454691	0.00572947	-0.387545	0.111037	7.83385	8.05081	7.87453	8.48272	8.37071	8.24904	7.53925	7.51371	7.56929
UBE2H	0.489979	0.00576236	-0.0272039	0.971551	7.70659	7.53641	7.80036	8.27136	8.15793	8.07229	7.82311	7.59979	7.53909
SRSF3	-0.396218	0.00578039	0.209475	0.457733	8.77576	8.9625	8.80789	8.41725	8.33428	8.60684	9.10591	8.96696	9.09546
CEBPB	0.377419	0.00597844	-0.0346976	0.966556	8.7079	8.82246	8.98832	9.3271	9.23682	9.08365	8.79475	8.82146	8.8126
TMEM147	0.45966	0.00604408	0.184387	0.682496	8.21164	8.16872	8.02741	8.60538	8.66643	8.49989	8.03922	8.40089	8.4844
STX12	1.04068	0.00608675	-0.00768547	NA	5.00086	5.29819	4.96063	6.25852	5.84903	5.9964	5.30859	4.78097	5.10835
CBR3	-1.34404	0.00611382	0.0764055	NA	5.41028	5.14649	5.48245	4.3127	4.12187	4.2051	4.95256	5.42001	5.7854
HSD11B1-AS1	1.39026	0.00648555	-0.264519	NA	4.23918	4.50179	3.9782	5.59144	5.62611	5.03951	3.86723	4.02299	4.22928
BMP4	-0.679316	0.00648555	-0.190051	0.810829	6.94346	7.20313	7.16301	6.66537	6.27129	6.40045	7.09695	6.93645	6.70516
IRF2BP2	-0.564324	0.00648637	-0.288607	0.495471	7.37491	7.63234	7.64603	7.0332	6.92597	7.05492	7.28687	7.36074	7.16682
ALOX5AP	-1.62547	0.00672078	0.275673	NA	4.96085	4.37099	5.26211	3.27333	3.73162	3.83969	5.03961	5.23675	5.18837
FSTL1	0.588808	0.00677188	0.0330165	0.971551	6.8259	6.78191	6.68093	7.36625	7.30106	7.33856	6.72902	6.77091	6.88403
SLTM	-0.452287	0.00691633	-0.223572	0.528759	8.9365	8.46975	8.64139	8.29238	8.27786	8.17886	8.52366	8.53803	8.36033
PTPRU	-1.86105	0.00692848	-0.146548	NA	4.42706	5.10593	4.46547	3.43329	3.34899	3.19514	4.47881	4.72635	4.50405
SLC3A2	0.506891	0.00699622	0.498718	0.0278981	7.60644	7.69521	7.3744	8.25539	8.02141	7.88979	7.91807	8.16457	8.06945
FOS	-1.75027	0.00704276	-1.64857	NA	5.28628	4.563	5.59473	2.88777	4.03375	4.12205	4.04609	4.02299	3.44442
ATP13A3	0.534357	0.00714814	-0.189357	0.765498	7.3825	7.19349	7.12611	7.74737	7.82538	7.70953	6.8782	7.13822	7.13688
HDAC7	-0.540147	0.00729191	-0.176845	0.768769	8.16838	7.67456	7.99197	7.54329	7.33832	7.41031	7.82311	7.6224	7.90155
CCR5AS	0.946673	0.00744328	0.0979642	NA	5.4685	5.26174	5.1563	6.12427	6.29043	6.10851	5.03961	5.51973	5.56329
KRT86	-1.77019	0.00744328	-0.366856	NA	4.59327	4.73243	4.91809	3.43329	3.195	3.61516	4.41512	4.61048	4.30303
TPX2	-0.32439	0.00746512	0.175894	0.466332	9.93448	9.87458	9.94869	9.68	9.37994	9.71018	10.0661	10.0871	10.1312
FAM83G	1.04336	0.00758913	0.183021	NA	5.15062	5.10593	4.73419	6.25852	5.76941	5.79666	5.08125	5.23675	5.18837
MPHOSPH8	-0.577442	0.00768414	-0.192472	0.763139	7.41247	7.24108	7.47319	6.91619	6.71552	6.82481	7.25083	7.09576	7.2249
NRP1	-0.466878	0.00768808	-0.272949	0.396673	8.18584	8.06146	8.07659	7.58648	7.59848	7.75847	7.83533	7.9726	7.70471
ANTXR2	-0.505678	0.00768808	-0.103511	0.89315	7.91983	7.86887	7.96611	7.41499	7.52766	7.32005	8.02328	7.75792	7.64215
MED24	-0.441244	0.00773365	-0.360458	0.117764	8.78724	8.64275	8.831	8.47355	8.27786	8.19926	8.35993	8.61522	8.19583
MIS18BP1	-0.514667	0.00774154	-0.0472509	0.966556	8.11926	8.08773	8.11004	7.6034	7.23344	7.88979	8.07572	8.10159	7.99908
FZD2	-0.558993	0.00783336	-0.00190463	0.998717	7.4777	7.41716	7.44351	6.99524	6.77108	6.93839	7.27794	7.51371	7.53144
FOXA2	-0.519232	0.00785075	-0.284831	0.457733	7.66363	7.82581	8.01233	7.37613	7.3291	7.29183	7.49373	7.48109	7.69789
NET1	-0.631952	0.00792023	-0.260216	0.65221	7.32851	7.15425	7.63294	6.87498	6.92597	6.48597	7.11711	7.08495	7.19615
TUBB2A	-1.48972	0.00796414	0.31708	NA	5.00086	4.93123	4.91809	3.93899	3.615	3.73179	5.34323	4.93342	5.37093
DUT	-0.329537	0.00806694	-0.112722	0.763139	9.28724	9.4716	9.39923	9.01882	9.10519	9.05315	9.31012	9.18264	9.32743
DNMT1	-0.343402	0.00813679	-0.293642	0.0958961	9.87519	9.52833	9.70153	9.42553	9.33456	9.34399	9.42372	9.47748	9.34935
LGALS8	-0.49362	0.00813679	-0.162928	0.768769	7.79456	8.08251	8.07659	7.51674	7.37465	7.61399	7.7921	7.75792	7.93092
LSM7	0.5439	0.00819365	0.112129	0.89851	7.08043	7.11391	7.16301	7.69307	7.51957	7.73071	7.12708	7.09576	7.43632
SERPINE1	0.544113	0.00831375	-0.114604	0.897005	7.60644	7.34928	7.55874	8.09116	8.02712	8.0159	7.0026	7.4645	7.65629
DUSP10	1.49847	0.00842618	-0.189698	NA	3.6731	4.22713	4.05872	4.96393	5.50024	5.21005	4.04609	3.34035	4.06941
GDF15	0.603797	0.00842618	0.343001	0.457733	6.66094	6.82002	6.74317	7.41499	7.47007	7.06607	6.95859	7.1896	7.06451
ENSG00000272622	-0.686395	0.00842618	-0.250605	0.726047	7.24769	7.10365	7.12611	6.45775	6.2123	6.77131	6.80554	7.20965	6.6915
ZWINT	-0.581694	0.00863344	-0.0779795	0.942106	7.49181	7.38362	7.39005	6.84683	6.9976	6.71575	7.10707	7.51371	7.39475
PAICS	-0.461425	0.00869005	-0.166426	0.743803	8.45784	8.13385	8.48627	8.05472	7.88955	7.79243	8.21783	8.09082	8.29857
ATRX	-0.496937	0.00878315	-0.125696	0.851403	8.49332	7.92823	8.32063	7.82876	7.70929	7.79913	8.23176	8.10694	8.09043
LZTS3	1.59606	0.00880092	0.106369	NA	3.6731	3.78855	4.05872	5.59144	4.42871	5.21005	3.86723	3.92937	3.98229
NFIB	-0.580212	0.00880092	-0.312301	0.489045	7.56701	7.31411	7.45842	6.81813	6.87617	6.96246	7.28687	7.21957	6.90786
LUC7L3	-0.393848	0.00902512	-0.0415049	0.966556	9.10426	8.77474	8.95452	8.47814	8.61042	8.59149	8.97949	8.98161	8.76119
C4orf3	-0.689023	0.00902512	-0.30325	0.626535	7.29672	6.95173	7.59294	6.30062	6.70129	6.85084	6.84233	7.02963	7.14693
MPHOSPH6	0.390992	0.0095006	0.146324	0.743803	8.3302	8.42923	8.57792	8.93106	8.72035	8.85203	8.49699	8.56163	8.71466
PHF10	-0.736679	0.0095006	-0.370245	NA	6.848	6.57461	7.13542	6.002	6.29043	6.19231	6.51783	6.31442	6.6915
EPHA2	-0.452947	0.00950556	-0.175311	0.71107	8.16399	8.28682	8.25806	7.82876	7.91444	7.61399	8.00176	7.95489	8.21983
FGF5	1.04298	0.00952966	0.309836	NA	5.15062	4.93123	5.11923	6.12427	6.0193	5.9247	4.65458	5.72868	5.47031
NUDC	0.4276	0.00956541	-0.0339064	0.967349	8.1815	8.32708	8.00219	8.61793	8.59125	8.58375	7.94651	8.16969	8.28953
DDX5	-0.336789	0.00956541	-0.103357	0.797052	9.12477	9.11845	9.18724	8.8412	8.72035	8.86485	8.9573	9.03596	9.12626
MTLN	0.681229	0.00966863	0.0323075	NA	6.30927	6.40111	6.13005	6.96937	6.88878	6.95048	6.05738	6.36893	6.48519
S100A4	-1.79965	0.00982388	-0.431895	NA	4.23918	5.0642	4.73419	3.43329	3.195	3.48827	4.34848	4.34644	4.3732
LINC00632	0.978626	0.00989154	0.296692	NA	5.25354	5.18593	4.82907	5.78185	5.92447	6.23246	5.44242	5.38517	5.26419
TRA2B	-0.440809	0.0101882	-0.035091	0.966556	8.13282	8.11353	8.17017	7.64485	7.77871	7.68804	8.00176	8.04133	8.25742
CIP2A	-0.494518	0.0103579	0.0905227	0.913397	7.96603	7.64655	7.91295	7.37613	7.23344	7.47867	7.86543	8.03573	7.91337
ENSG00000269028	0.684209	0.0106732	0.43884	NA	6.26067	6.54458	5.99333	6.96937	6.90129	6.93839	6.75498	6.84968	6.46926
SRRT	-0.487605	0.0107103	0.111997	0.870275	7.96603	7.89885	7.70351	7.28468	7.43609	7.41904	7.91807	8.12289	7.85939
STS	-1.17617	0.0107103	-0.415048	NA	5.52446	5.49948	5.59473	4.67475	4.73846	4.03393	5.34323	4.88438	5.22678
CLTB	0.540611	0.0107943	-0.127821	0.880254	7.32851	7.89885	7.5166	8.37845	7.99831	7.98098	7.50906	7.45613	7.45261
PHC2	-0.496232	0.0107943	-0.201929	0.684292	7.76583	7.97402	7.69724	7.2421	7.28206	7.45341	7.62621	7.52975	7.69104
PTMAP5	-1.41623	0.0107943	-0.47198	NA	5.60452	5.10593	5.04211	3.27333	4.62241	4.03393	4.90697	4.88438	4.7871
C9orf72	1.05877	0.0110228	-0.0445584	NA	4.78874	4.73243	4.96063	5.68979	5.76941	5.87484	4.95256	4.88438	4.50405
LBR	-0.47618	0.0110228	-0.0618852	0.950202	7.94054	7.80696	8.0958	7.57794	7.30106	7.56766	7.87137	7.86925	7.93673
TBC1D1	0.580916	0.0112203	0.215833	0.757593	6.86977	6.71607	6.53376	7.27415	7.34749	7.2037	7.0026	6.83685	6.91963
ABI3BP	1.08585	0.0115707	0.125646	NA	4.53997	4.78476	5.00194	5.89612	5.82297	5.53297	4.85991	5.15639	4.62401
BMPR2	-0.637895	0.0115707	-0.0852773	0.945141	7.14433	7.04049	7.26834	6.56529	6.56647	6.48597	7.38156	6.88751	6.88403
KRCC1	-1.40724	0.0117828	-0.680771	NA	5.22004	4.78476	5.59473	3.93899	4.42871	3.73179	4.59834	4.54886	4.7871
CLSPN	-0.491196	0.0118905	-0.308507	0.372074	8.21589	7.75545	7.97132	7.52564	7.55956	7.45341	7.61916	7.75792	7.69789
MSH6	-0.446939	0.0119004	-0.291466	0.337797	8.44339	8.19313	8.11004	7.89897	7.73746	7.81244	8.01256	7.85659	8.03198
BCL3	-1.05566	0.0121239	-0.207978	NA	5.57833	5.70353	5.7483	4.79746	4.99332	4.35809	5.47402	5.42001	5.56329
GRAMD1A	0.839703	0.0121723	0.400555	NA	5.4685	6.12485	5.51135	6.6162	6.48574	6.45237	6.17742	6.35099	5.70606
APOBEC3F	-1.32029	0.012295	-0.626575	NA	5.22004	5.40234	5.45296	4.04188	4.62241	3.94008	5.16108	4.8336	4.30303
ANXA1	0.451221	0.0123278	-0.0694743	0.938213	7.79456	7.77498	7.82359	8.14993	8.28265	8.28766	7.45466	7.83739	7.86549
STAG1	-0.663466	0.0123278	0.221281	0.768769	7.01357	7.04049	6.96831	5.95003	6.50225	6.5667	7.38156	7.29657	6.95438
SPAG4	-1.30058	0.0123309	0.109463	NA	5.11461	5.59049	5.42286	4.79746	4.20491	3.61516	5.30859	5.15639	5.88482
CEP170B	1.10136	0.0124557	0.0483782	NA	4.78874	5.26174	4.52337	6.12427	5.97267	5.4672	4.81125	5.23675	4.68045
FOXN2	0.927003	0.0124697	0.787921	NA	4.91971	5.18593	5.19244	5.86839	5.74187	6.19231	5.80744	5.86134	5.7854
MCAM	0.842557	0.0125019	-0.00249213	NA	5.52446	5.43545	5.56747	6.10063	6.48574	6.27152	5.37706	5.45402	5.67862
SMC3	-0.358988	0.012565	-0.281632	0.198223	10.039	9.59945	9.8935	9.55511	9.37323	9.56249	9.65327	9.55004	9.52143
ENSG00000286792	1.15802	0.0129047	0.943582	NA	4.36711	4.97693	4.20741	5.65774	5.62611	5.39828	5.34323	5.70062	4.97932
PDCD5	-0.56719	0.0129047	-0.0508299	0.966556	8.23698	7.91655	8.31654	7.6034	7.70929	7.51167	8.13128	7.66659	8.44829
DNAJB6	-0.398752	0.0130833	-0.0392314	0.966556	8.42513	8.40854	8.44941	7.84308	8.13694	8.09968	8.33433	8.36559	8.46445
GPATCH11	0.4873	0.0132023	-0.00923221	0.991842	7.25598	7.30518	7.25985	7.85725	7.74442	7.64407	7.13699	7.33359	7.31678
UHRF1	-1.09891	0.0132023	0.0958367	NA	5.96958	5.36846	5.53969	4.60925	4.20491	5.08407	5.62241	5.75621	5.83597
TNFRSF1A	-0.48423	0.0132053	-0.191932	0.712779	7.68834	7.80696	7.94508	7.45282	7.3566	7.21376	7.52424	7.65932	7.69789
HEG1	-0.548994	0.0132053	0.0220895	0.979846	7.78886	7.58886	7.85775	7.30551	7.4013	6.88901	7.88319	7.88803	7.51601
NRP2	1.03851	0.0132691	0.0722999	NA	5.00086	5.22433	4.96063	6.53033	5.62611	5.71401	5.16108	5.11447	5.10835
ARL4C	0.374697	0.0132691	-0.273446	0.293369	8.42145	8.65334	8.70844	9.02511	8.91789	8.96654	8.35144	8.17989	8.44014
CTNNA1	-0.364184	0.0132691	-0.201937	0.495471	8.99956	8.8897	9.1114	8.71064	8.51193	8.69926	8.9032	8.67413	8.82204
ARHGAP22	0.903335	0.0136339	-0.0140095	NA	5.8651	5.36846	5.1563	6.42004	6.27129	6.32819	5.85623	5.34947	5.14892
ATP6V0E1	0.4295	0.0136995	0.318505	0.262705	7.65738	7.97964	7.7406	8.33859	8.15793	8.15817	8.07056	8.11759	8.14158
MARCKS	-0.380408	0.0136995	-0.189198	0.574362	8.61107	8.71532	8.86778	8.48272	8.25855	8.3299	8.60083	8.46902	8.56905
HMMR	-0.874101	0.0136995	0.271423	NA	6.73396	6.1845	6.46155	5.11317	5.50024	6.15102	6.84233	6.40415	6.91963
PLP2	-0.387511	0.01372	-0.191446	0.577923	8.63986	8.84111	8.74236	8.35367	8.428	8.29241	8.48927	8.41823	8.73145
DCBLD1	-0.490164	0.01372	0.0584696	0.955158	7.55363	7.69521	7.6395	7.29513	7.04345	7.10983	7.63322	7.68102	7.74496
PKIB	1.14508	0.0139431	0.0400139	NA	4.83373	4.50179	4.27638	5.55712	5.56455	5.56477	4.41512	4.48449	4.83761
LHFPL2	0.779775	0.0139556	-0.0130655	NA	5.68038	5.73046	5.81936	6.54791	6.2123	6.64315	5.59393	5.86134	5.733
PTPN22	1.91107	0.0140705	-0.179061	NA	3.85869	3.15532	2.9295	4.60925	4.84586	4.94603	2.78431	3.92937	2.79726
DCBLD2	0.285399	0.0140705	-0.156874	0.521436	9.57911	9.37037	9.46349	9.77827	9.73984	9.75738	9.30574	9.31578	9.33404
HMGB1	-0.333256	0.0141174	-0.0880533	0.856064	9.13154	9.06126	9.25502	8.86244	8.73789	8.86166	9.03881	8.99033	9.1589
ANKRD37	-1.0765	0.0141174	-0.359625	NA	5.72883	6.36719	6.40107	4.91055	5.62611	4.94603	5.50494	5.42001	6.42038
SH3BP5	0.774881	0.0141222	0.0899104	NA	5.88661	5.61959	5.59473	6.45775	6.56647	6.27152	5.83204	5.72868	5.81091
CARD10	-1.5964	0.0143162	-0.288419	NA	4.36711	4.88404	5.1563	3.27333	3.83952	3.61516	4.41512	4.61048	4.73476
GNPTAB	0.752628	0.0143848	0.0169083	NA	5.9896	5.83342	5.72381	6.53033	6.70129	6.45237	5.75695	6.11626	5.70606
CLIP4	0.594802	0.0148628	0.178392	0.83098	6.6484	6.48257	6.5196	7.12979	7.23344	7.00943	6.88996	6.62924	6.6355
IGFBP6	-0.842781	0.0148628	-0.173875	NA	6.15827	6.22293	6.23773	5.2908	5.68515	5.24972	5.97142	5.83577	6.28133
SMOX	-1.15975	0.0148904	0.355244	NA	5.34961	5.29819	5.53969	4.85511	4.03375	4.2051	5.41011	5.95933	5.75944
SPOCD1	1.00822	0.0149117	-0.395145	NA	5.11461	4.73243	4.96063	6.02729	5.74187	5.79666	4.76089	4.61048	4.4401
CD22	1.56167	0.015043	0.0484747	NA	3.6731	4.06732	3.36909	4.85511	5.20984	4.79337	4.04609	3.72167	3.44442
ENSG00000253683	-0.661382	0.015043	-0.367152	0.495471	6.85893	6.97444	7.21664	6.40081	6.32796	6.43527	6.51783	6.45543	6.97709
BCL6	1.13975	0.0152368	-0.108079	NA	4.64468	4.563	4.52337	5.37203	5.76941	5.56477	4.70872	4.61048	4.06941
CREBRF	0.665384	0.0153519	-0.100295	NA	6.17585	6.33245	6.33793	6.80356	6.75739	7.16273	6.05738	6.17861	6.31737
GALNT6	0.557623	0.0153519	-0.0915158	0.934676	6.79211	7.11391	6.97869	7.53449	7.34749	7.62911	6.84233	7.08495	6.6777
CPE	-1.10586	0.0153818	-0.213939	NA	5.49675	5.53046	5.7483	4.85511	3.9399	4.89692	5.23672	5.45402	5.50198
PIH1D1	-0.36392	0.0155836	-0.167659	0.635151	9.2771	9.35747	9.40116	9.00933	9.12665	8.79954	9.00135	9.15964	9.35586
MAN2A1	0.470515	0.0155971	0.0922062	0.914677	7.35961	7.28716	7.26834	7.86429	7.67329	7.75847	7.486	7.39616	7.29887
CD99L2	-0.588675	0.0160144	-0.0559983	0.966556	7.07107	7.32298	7.26834	6.87498	6.51858	6.55091	7.3648	7.07405	7.04314
DNTTIP2	0.438114	0.0162063	0.112244	0.867887	7.9811	7.6676	7.75879	8.20639	8.17348	8.33912	7.75399	8.06353	7.93092
RBM39	-0.305339	0.0162063	0.152665	0.575111	9.4369	9.35097	9.30127	9.0345	9.01026	9.13485	9.59338	9.52826	9.42149
TAGLN2	-0.345045	0.0162063	-0.1075	0.812533	9.39998	9.74521	9.70779	9.32965	9.28294	9.23212	9.36171	9.56763	9.61309
UPP1	0.702285	0.016694	0.0948249	NA	6.17585	6.24177	5.90896	6.92967	6.61282	6.79831	6.3406	5.86134	6.35253
ARHGEF18	0.618111	0.0167589	0.0905977	0.948773	6.44595	6.38425	6.44667	7.22033	6.90129	6.92621	6.42387	6.42145	6.6777
C19orf33	0.600244	0.0167589	0.167288	0.857239	6.34078	6.95173	6.57541	7.28468	7.15207	7.22375	6.75498	6.87501	6.77162
NEDD4L	0.363282	0.0167589	-0.0625586	0.928285	8.39918	8.21713	8.23658	8.60538	8.72035	8.61065	8.21783	8.26858	8.19098
BNIP3L	-0.55323	0.0169399	-0.342149	0.424815	7.9811	8.29586	8.67051	7.53449	7.99831	7.81904	7.87729	7.85659	8.24811
SEL1L3	1.22961	0.0170825	0.34822	NA	4.17069	3.98025	4.57903	5.33199	5.39807	5.21005	4.70872	4.61048	4.30303
GMNN	-0.494079	0.0170825	-0.00398667	0.996856	7.54012	7.56661	7.659	7.04563	7.03212	7.23368	7.56149	7.45613	7.72498
GTSE1	-0.60809	0.0170893	0.19267	0.792302	7.10817	6.97444	6.95785	6.45775	6.10828	6.67263	7.29574	7.19966	7.10631
CTH	1.47794	0.0173007	-0.0785713	NA	3.76888	4.14944	3.60188	5.15967	5.2881	4.62262	3.76874	4.02299	3.56923
UBE2S	-0.771575	0.0173182	0.359864	NA	6.12246	6.5894	6.32171	5.97625	5.50024	5.36255	6.72902	6.67322	6.6915
ATAD2	-0.390217	0.0173407	-0.154815	0.729919	8.62394	8.43743	8.40004	8.18969	8.14221	7.98098	8.26827	8.43536	8.30756
PMP22	0.608776	0.0174349	-0.0102761	0.992332	6.8259	6.68886	6.87132	7.59497	7.26281	7.29183	6.42387	6.74367	7.11657
BAZ1B	-0.457235	0.0174349	-0.0474172	0.966556	8.83505	8.44964	8.36088	8.00465	7.99831	8.31128	8.61862	8.56941	8.35167
YBX3	0.315835	0.0174992	0.125664	0.743803	8.71091	8.80039	8.87058	9.13392	9.06408	9.12689	8.98499	8.86003	8.91023
CD276	0.746651	0.0177612	0.0448956	NA	5.68038	5.73046	5.90896	6.63277	6.53472	6.25212	5.73103	5.86134	5.8606
RRP7A	0.44507	0.017894	0.176401	0.750005	7.41247	7.50556	7.40552	7.97894	7.90205	7.74465	7.56882	7.6149	7.65629
PABPC1	0.26249	0.0180768	-0.0495341	0.924914	11.3478	11.5036	11.4541	11.8048	11.5732	11.709	11.4204	11.4781	11.2531
NOL4L	-0.653459	0.0182111	-0.309643	NA	6.96384	6.70253	6.95785	6.36157	6.40022	5.97289	6.72902	6.56843	6.43686
PLOD2	-0.418331	0.018316	0.0268346	0.968698	7.95079	8.22662	8.15194	7.68515	7.71639	7.7024	8.04974	8.15426	8.21028
WDR76	-0.759388	0.018316	-0.151294	NA	6.44595	6.48257	6.35398	5.59144	5.87462	5.65615	5.94911	6.35099	6.50094
LINC01322	1.49456	0.0188128	1.11123	NA	3.85869	3.44269	3.60188	4.73741	4.49621	5.1273	4.41512	4.48449	4.56527
PPIC	1.00565	0.0188128	0.119442	NA	4.59327	4.97693	4.91809	5.78185	5.89976	5.50046	4.99674	4.8336	4.97932
CDC37	0.283376	0.0188128	-0.129867	0.666619	9.80208	9.99469	9.80873	10.2357	10.1545	10.0645	9.64635	9.8281	9.74464
NCOA5	-0.875379	0.0188128	-0.156276	NA	6.06701	5.90609	6.16684	5.11317	5.2495	5.36255	5.88001	5.58258	6.18708
FOXQ1	0.991608	0.018862	-0.276255	NA	4.69431	5.36846	4.91809	5.89612	6.06448	5.76964	4.95256	4.88438	4.4401
LATS2	0.789753	0.018862	0.370042	NA	5.72883	5.61959	5.39211	6.30062	6.32796	6.3466	6.19649	5.91116	5.62211
KATNB1	0.67196	0.018862	-0.0708645	NA	6.19322	6.66114	6.32171	6.88885	6.91368	7.30129	6.57724	6.31442	6.06521
ERC2	0.878147	0.0190239	0.497629	NA	5.43968	5.18593	5.56747	6.05216	6.34637	6.25212	6.21531	5.93545	5.30065
PCF11	-0.829611	0.0191829	-0.14438	NA	5.9078	6.24177	6.36984	5.48591	5.2495	5.50046	6.25223	5.86134	6.00018
RPS14	0.273992	0.0197995	0.140189	0.597717	11.5129	11.8771	11.6017	11.9635	11.9339	11.9395	11.7853	11.7444	11.9016
USP1	-0.430321	0.0203509	-0.0646792	0.941398	8.20737	7.99638	8.04729	7.66917	7.48676	7.81904	7.92381	8.07996	8.06416
OSBPL6	0.920736	0.0204649	0.0571521	NA	4.87736	5.40234	5.04211	6.05216	5.92447	5.89999	4.90697	5.19713	5.37093
GTF2A1	-0.466081	0.0204707	-0.0524047	0.966556	7.96603	7.70203	7.69094	7.30551	7.28206	7.41904	7.86543	7.63728	7.7115
NEK2	-0.686576	0.0204707	0.312245	NA	6.57079	6.55968	6.91523	6.14753	5.87462	6.08677	6.94738	6.72985	7.25308
LAYN	0.680594	0.0205029	0.0350281	NA	5.96958	6.10441	5.86485	6.49449	6.70129	6.67263	6.01504	5.95933	6.06521
BEX2	1.32763	0.0205356	0.135609	NA	3.85869	4.22713	3.9782	5.11317	5.0393	5.21005	4.04609	3.82926	4.4401
DPM2	0.657619	0.0205356	0.166707	NA	6.08573	6.1845	6.05351	6.75895	6.65773	6.78487	6.23389	6.47212	6.06521
CAPRIN1	-0.338465	0.0208081	-0.10386	0.83098	8.97467	8.74863	8.94661	8.61376	8.5951	8.46661	8.82264	8.73419	8.81575
CBX1	-0.385502	0.0208081	-0.255619	0.378434	8.41036	8.21713	8.34089	7.98541	7.9389	7.91467	8.15585	7.99587	8.06416
TMEM192	0.579624	0.0208105	-0.133414	0.898965	6.57079	6.52933	6.64226	7.31581	7.1096	6.98614	6.56262	6.47212	6.31737
C16orf74	0.671558	0.0210234	-0.00102951	NA	6.02882	6.10441	5.88708	6.71292	6.53472	6.68715	5.9934	6.05108	5.97783
SEPTIN7	-0.371021	0.0210234	-0.196331	0.558065	8.69881	8.44964	8.66409	8.17844	8.17863	8.36192	8.39337	8.36559	8.4844
UBE2E3	-0.65068	0.0210234	-0.224271	NA	6.99389	6.74276	6.81447	6.19296	6.40022	6.08677	6.88996	6.42145	6.5623
COA1	-0.530105	0.0213739	0.0392949	0.968255	7.43454	7.36655	7.20784	6.69724	6.86344	6.90152	7.38986	7.1896	7.53144
POLR2L	-0.418413	0.0214959	0.0252008	0.971551	8.51765	8.91926	8.75752	8.22291	8.35715	8.38882	8.5792	8.68132	8.99889
YIPF2	0.888117	0.0220442	0.446771	NA	5.41028	5.26174	4.82907	5.72113	6.10828	6.12992	5.44242	5.72868	5.593
POLR3G	0.614315	0.0220442	0.0944526	0.945141	6.57079	6.5894	6.14856	6.83255	7.20346	7.05492	6.47162	6.53704	6.60666
SF3B5	0.346564	0.0221987	-0.00316901	0.996619	9.01917	9.40421	9.35805	9.68399	9.58762	9.56839	9.15548	9.19778	9.42975
ABHD4	1.06495	0.0222768	0.127193	NA	4.7423	4.62172	4.57903	5.86839	5.50024	5.36255	4.65458	4.54886	5.02362
FARSB	0.503298	0.0223082	0.159322	0.83098	6.99389	6.90521	6.93669	7.45282	7.43609	7.41904	6.9132	7.14864	7.2249
ANKRD26	-0.604287	0.0224223	-0.0379617	0.969241	7.23097	6.85715	7.13542	6.34154	6.43504	6.70152	7.26896	6.96032	6.88403
PRELID3B	0.535642	0.0228001	0.199967	0.778531	6.97393	6.98566	6.926	7.2421	7.62887	7.54393	6.8782	7.21957	7.33448
LRRC20	0.795964	0.0230697	-0.0309381	NA	5.41028	6.10441	5.42286	6.43902	6.3825	6.45237	5.70463	5.80973	5.40482
SFTA1P	0.747787	0.0231691	0.25811	NA	5.52446	5.92952	5.59473	6.56529	6.29043	6.30955	6.01504	5.75621	6.00018
FAM107B	-0.364614	0.0234223	0.159371	0.682496	8.24533	8.31823	8.39229	7.97894	7.99248	7.90849	8.46981	8.46902	8.4923
STAM	0.585226	0.0235564	0.286927	0.638112	6.74578	6.54458	6.36984	7.14143	6.91368	7.30129	6.71586	6.81083	6.97709
YLPM1	-0.457961	0.0235564	-0.294964	0.421308	8.1815	7.8628	8.08622	7.78493	7.31047	7.67353	7.77951	7.7849	7.71826
ETHE1	0.524826	0.0238065	0.174416	0.812727	6.67337	6.96313	6.83748	7.43403	7.4013	7.16273	6.95859	7.02963	6.99944
HNRNPD	-0.305453	0.0238065	-0.282535	0.114147	9.71458	9.53217	9.53384	9.3648	9.18662	9.32323	9.24292	9.44825	9.24796
TMEM154	0.66752	0.0240061	-0.125703	NA	6.08573	5.92952	6.07303	6.75895	6.64292	6.59777	6.07809	5.91116	5.733
FOXC1	0.783598	0.0240628	-0.235219	NA	6.02882	5.70353	5.59473	6.80356	6.53472	6.19231	5.44242	5.86134	5.37093
TYMS	-0.486858	0.0241046	-0.0924085	0.924914	7.90409	7.77498	7.91835	7.41499	7.48676	7.26304	7.49373	7.72348	8.05884
CLTC	-0.306544	0.0243178	-0.200277	0.411904	8.91049	8.94536	8.99856	8.66704	8.648	8.62957	8.75027	8.765	8.74475
PRDM8	-0.938134	0.0246201	-0.156207	NA	5.70481	5.56078	5.93052	4.73741	4.94582	4.99353	5.78242	5.42001	5.56329
WDR1	0.356483	0.0247453	-0.244888	0.40989	8.11014	8.22188	8.3042	8.48272	8.5951	8.61446	8.00176	7.96672	7.94827
CENPU	-0.461686	0.0247453	-0.0375793	0.967349	7.66363	7.62518	7.65253	7.08231	7.12033	7.36589	7.69487	7.6149	7.51601
BRI3	0.384159	0.0247718	0.030332	0.968255	8.03025	8.08251	8.36484	8.57139	8.52006	8.5484	8.08086	8.16969	8.32978
AMPH	0.697888	0.0252989	0.0418806	NA	5.84326	5.85805	5.90896	6.63277	6.58209	6.36478	5.83204	6.11626	5.75944
IL31RA	1.00021	0.0257929	-0.298422	NA	4.7423	4.93123	4.73419	5.68979	5.59565	5.79666	4.27861	4.48449	4.83761
HMGA2	-0.518304	0.0257929	-0.172203	0.809222	8.51074	8.39177	8.31244	7.46213	8.19903	7.92696	8.46981	8.31095	7.86549
EDN1	1.22272	0.0258436	-0.00329808	NA	4.53997	3.78855	4.52337	5.44894	5.43293	5.24972	4.70872	3.72167	4.3732
JMJD1C	0.441288	0.0258436	-0.0742936	0.937103	7.96603	7.91655	7.86896	8.27664	8.35715	8.41957	8.11634	7.86925	7.47672
PSMD14	0.364776	0.0258436	0.0535225	0.951021	8.03988	8.20758	8.22354	8.60118	8.3662	8.57986	8.21315	8.22492	8.19583
CNN2	-0.524618	0.0258436	-0.140641	0.862933	7.45628	7.67456	7.58617	7.38595	7.0092	6.72984	7.31331	7.49749	7.49256
CENPA	-0.544632	0.0258436	0.197596	0.768769	7.26422	7.50556	7.35858	7.07018	6.51858	6.91391	7.76041	7.36968	7.55427
MLPH	-0.682563	0.0258436	0.0492659	NA	6.55744	6.76898	6.54777	6.27972	5.97267	5.62633	6.85438	6.61427	6.53195
DENND2A	-0.759032	0.0258436	0.223332	NA	6.37162	6.34993	6.57541	5.52195	5.74187	5.87484	6.99172	6.65871	6.18708
OGFRL1	-0.368946	0.0258853	-0.227474	0.474423	8.63986	8.4127	8.44567	8.1614	8.13164	8.12656	8.30827	8.3745	8.1466
HK1	0.362164	0.0259176	-0.212353	0.531803	8.19017	8.41685	8.42304	8.83405	8.6066	8.66667	8.21315	8.13866	8.05351
CASP4	1.80264	0.0260023	0.799415	NA	2.28558	3.68222	3.60188	4.46858	4.49621	4.84607	3.42508	3.82926	4.15156
KIF21A	0.66756	0.0260023	0.254899	NA	6.27705	5.83342	5.90896	6.51252	6.61282	6.82481	6.28823	6.25778	6.24437
ISM1	-1.75146	0.0261226	-0.680622	NA	4.48462	4.62172	4.46547	2.88777	3.615	3.19514	4.20519	4.1109	3.56923
SYF2	0.433944	0.0262939	0.112458	0.879834	7.65738	7.68836	7.85212	8.29759	8.16313	8.0159	8.07056	7.68819	7.74496
SAPCD2	-0.810501	0.0263094	0.050407	NA	5.9896	6.04128	6.11129	5.2908	5.39807	5.21005	5.78242	6.21874	6.24437
SIGLEC15	1.17353	0.0274656	0.0459276	NA	4.59327	4.14944	4.63263	5.68979	5.16906	5.59588	4.04609	5.0713	4.22928
FERMT2	0.386573	0.0274656	0.041106	0.966556	8.05421	7.8567	7.74669	8.22838	8.29217	8.29715	7.91807	7.99009	7.88963
P2RX4	1.07568	0.0277022	0.10405	NA	4.64468	4.67814	4.34221	5.81128	5.2881	5.36255	4.59834	4.48449	4.83761
RUBCN	0.792325	0.0281765	0.302513	NA	5.41028	5.64812	5.19244	6.32123	6.12969	6.01953	5.85623	5.64281	5.593
DHRS7	0.695025	0.0283155	-0.0268167	NA	6.19322	5.80836	5.77238	6.63277	6.74357	6.40045	6.03637	5.93545	5.75944
MAPK6	0.639167	0.0289962	0.111172	NA	6.06701	6.10441	6.25492	6.54791	6.77108	6.91391	6.43996	6.11626	6.16747
ATP6AP2	0.515393	0.0290746	0.0548144	0.966556	6.94346	6.96313	6.97869	7.653	7.26281	7.45341	6.80554	7.00689	7.2058
ENSG00000226332	-2.29803	0.0290746	-0.000594228	NA	4.30456	3.88758	3.80227	2.64789	2.60006	2.82684	3.76874	3.82926	4.3732
RIPOR1	0.626862	0.0296336	-0.521692	NA	6.35628	6.60404	6.49087	7.38595	6.70129	7.10983	5.9934	5.91116	6.06521
RPS16	0.257519	0.0296336	0.0826818	0.83098	12.0466	12.3001	12.1684	12.4143	12.507	12.3729	12.1793	12.1563	12.4224
HJURP	-0.443977	0.0298888	0.384734	0.149188	7.96603	7.72898	7.63294	7.29513	7.23344	7.50349	8.25013	8.06353	8.16649
ROR1	-1.53811	0.0304173	0.184907	NA	4.7423	4.78476	4.27638	3.27333	3.615	3.48827	5.12171	4.72635	4.3732
THRA	-0.860047	0.0307754	-0.284656	NA	6.17585	6.22293	6.01367	5.59144	4.89671	5.4672	5.41011	6.23839	5.8606
TM7SF2	-0.970256	0.0308934	-0.111494	NA	5.4685	5.59049	5.72381	4.67475	4.62241	4.89692	5.56487	5.15639	5.70606
FAM131A	0.608892	0.0311168	-0.262272	NA	6.37162	6.41777	6.25492	6.81813	6.97412	6.99783	5.83204	6.05108	6.3698
SLC43A1	0.981687	0.0314185	-0.0727122	NA	4.91971	4.73243	4.63263	5.86839	5.50024	5.53297	4.65458	4.8336	4.62401
RUSC2	0.943307	0.0314185	0.0397886	NA	5.18575	4.563	5.36069	5.86839	6.23223	5.65615	5.23672	5.27531	4.7871
SNX9	0.510955	0.0314185	0.0812597	0.945141	7.02332	6.78191	6.68093	7.26355	7.31047	7.41904	6.80554	6.9721	6.96578
ACSL3	-0.299356	0.0317751	-0.00390759	0.995068	8.91573	8.86561	8.92529	8.60118	8.5561	8.65932	8.9061	8.91906	8.87136
PDGFC	-0.589919	0.0317751	-0.161696	0.862933	7.41986	7.34057	7.23408	6.43902	6.86344	6.92621	7.46256	7.23921	6.73211
CHAF1A	-0.667233	0.031815	-0.0468448	NA	6.79211	6.8325	6.35398	6.17042	5.74187	6.17181	6.662	6.75735	6.45315
JPT1	-0.359001	0.0319812	-0.150985	0.739566	8.39543	8.53231	8.50076	8.18407	8.04414	8.13717	8.18479	8.3294	8.45639
ARNTL2	0.702182	0.0330442	-0.00389354	NA	5.75245	5.83342	5.81936	6.34154	6.56647	6.46927	6.03637	5.48725	5.81091
NDUFB1	-0.377474	0.033152	-0.0335173	0.967239	8.884	8.7354	8.88721	8.51885	8.46216	8.41085	8.71103	8.57328	9.0798
MVB12A	0.615933	0.0332127	0.0298789	NA	6.00935	6.34993	6.16684	6.75895	6.8506	6.68715	6.07809	6.19882	6.33506
RAB31	-0.309024	0.0332127	-0.137276	0.712807	9.12477	9.06391	9.20946	8.95103	8.75521	8.77257	8.97398	8.90068	9.11094
TPR	-0.299085	0.0336612	-0.364801	0.0178674	9.77349	9.42703	9.72331	9.35983	9.3844	9.31391	9.32536	9.31115	9.22443
IFRD2	0.477441	0.0337203	0.240478	0.643675	6.85893	7.31411	6.99924	7.48969	7.57525	7.52789	7.26896	7.32442	7.30785
UCN2	-1.57206	0.0338487	-0.911673	NA	4.42706	4.50179	4.96063	3.57728	3.48812	3.34914	3.86723	4.1109	3.7905
FLNC	0.668434	0.0340185	-0.277545	NA	5.94928	5.90609	5.99333	6.66537	6.56647	6.51881	5.78242	5.38517	5.8606
FN1	-0.703245	0.0340445	-0.702139	NA	6.50277	6.8325	7.19007	6.002	6.43504	6.10851	6.51783	5.93545	6.06521
UBASH3B	0.464702	0.0342348	0.0728785	0.948773	7.52648	7.36655	7.11674	7.70096	7.77871	7.91467	7.58339	7.42217	7.2249
BPTF	-0.385088	0.0342348	0.00220868	0.998717	8.8295	8.46575	8.8166	8.26073	8.30635	8.42824	8.9032	8.68848	8.53502
SLC38A10	-0.965568	0.0342348	-0.0743306	NA	5.25354	6.04128	5.97269	5.2484	4.62241	4.84607	5.37706	5.86134	5.88482
HELB	1.69408	0.0345057	0.805609	NA	3.34044	3.56742	2.9295	4.79746	4.12187	4.56089	4.12783	3.82926	3.44442
LAMC2	0.58536	0.0345412	-0.168018	NA	6.22734	6.55968	6.43163	7.16441	6.90129	6.83788	6.28823	6.13734	6.31737
NAA25	0.564714	0.0346156	0.740915	0.00758464	6.37162	6.46664	6.38554	7.05796	6.65773	7.09901	7.1566	7.21957	6.97709
CDK2AP1	-0.544416	0.0346156	-0.0715509	0.957081	6.98394	7.15425	7.5166	6.63277	6.70129	6.78487	7.24168	7.02963	7.21538
LINC01775	1.02552	0.0348772	0.831162	NA	4.64468	5.43545	4.05872	5.52195	5.99617	5.62633	5.34323	5.72868	5.56329
M6PR	0.580833	0.0348772	0.294967	NA	6.40181	6.41777	6.22033	6.90258	6.82458	6.98614	6.37449	6.79765	6.6915
EIF5	-0.348762	0.0348772	0.290157	0.21985	8.43246	8.76501	8.63484	8.17844	8.26824	8.35739	8.9061	8.82796	8.97088
RPL26L1	0.574639	0.0349374	0.202284	0.812533	6.51664	6.27873	6.46155	6.75895	7.02071	7.12057	6.56262	6.48863	6.78455
RPS6KA2	1.21252	0.0349651	0.0450572	NA	4.30456	3.98025	4.05872	5.01541	5.20984	5.16927	4.12783	4.41712	3.88958
C22orf46	-1.71722	0.035224	-0.529554	NA	4.7423	4.37099	4.34221	3.09339	3.195	3.48827	4.12783	4.48449	3.44442
KLF10	-0.93499	0.0352315	-0.0052605	NA	5.49675	5.64812	5.77238	4.54063	5.20984	4.56089	5.59393	5.5515	5.75944
ZBTB43	0.690453	0.0352855	0.187448	NA	5.9078	5.95257	5.88708	6.71292	6.19209	6.7438	6.11865	5.83577	6.28133
SF3B2	0.259319	0.035458	-0.0900104	0.812646	9.77349	9.65321	9.63251	10.0211	9.944	9.87142	9.55696	9.70462	9.52914
GAPDH	-0.240094	0.0355117	-0.146651	0.50284	13.1159	13.369	13.439	13.1219	13.0443	13.0561	13.1076	13.1269	13.2639
DNAJC7	-0.399418	0.0357014	0.0109148	0.988168	8.00589	8.16872	7.97651	7.64485	7.51957	7.79913	8.14116	8.09621	7.94251
NIPAL3	0.593088	0.0359249	-0.268179	NA	6.47464	6.20384	6.58903	7.15297	6.82458	7.02094	6.39114	6.02868	6.08625
FST	0.906024	0.0360742	0.47597	NA	5.15062	5.02122	5.32857	5.86839	5.99617	6.12992	5.62241	6.07313	4.88641
CD9	0.377021	0.0361712	-0.244301	0.493225	8.85973	8.54753	8.97282	9.15989	9.20691	9.17145	8.47763	8.34761	8.82204
TGFBI	-1.34338	0.036244	0.384899	NA	4.7423	4.73243	4.82907	3.09339	4.20491	3.61516	4.95256	5.27531	5.06661
CTDSPL	-0.757274	0.0366518	-0.237958	NA	6.08573	6.26037	6.35398	5.65774	5.71379	5.16927	6.25223	5.91116	5.83597
PDE8A	-0.712286	0.0370776	0.457413	NA	6.21038	6.33245	6.05351	5.411	5.46698	5.71401	6.76779	6.7159	6.40372
TMEM33	0.515301	0.0371286	0.15374	0.862933	7.02332	7.0188	6.81447	7.32604	7.55165	7.47867	7.23247	7.28717	6.73211
RPS28	0.253556	0.0371286	0.0909643	0.80225	10.9534	11.2031	11.0851	11.3957	11.3656	11.2453	11.0438	11.1611	11.3067
BCLAF1	-0.428749	0.0371286	-0.0315835	0.968255	7.66984	7.68836	7.81203	7.29513	7.14157	7.46188	7.70822	7.73043	7.64215
KRT81	-0.302234	0.037271	-0.252924	0.252923	9.83702	10.0952	10.2276	9.80595	9.78102	9.6941	9.684	9.80357	9.93209
ANXA11	-0.408277	0.0374563	-0.186455	0.705166	7.98609	8.01293	8.1837	7.8143	7.73047	7.41904	7.88906	7.81138	7.93673
FKBP3	-0.457477	0.0374563	-0.109458	0.896311	8.22013	7.8628	8.54336	7.73974	7.72345	7.88979	8.12632	7.99009	8.25742
VANGL1	-0.694514	0.0374563	-0.306372	NA	6.40181	6.45053	6.22033	5.84011	5.62611	5.65615	6.17742	5.86134	6.14759
DNAJC9	-0.48625	0.0379831	-0.129551	0.870884	7.44183	7.28716	7.42084	6.84683	7.05469	6.82481	7.19503	7.12772	7.43632
PTGS2	0.450185	0.0380021	-0.16527	0.807841	7.22254	7.3318	7.43599	7.84308	7.73047	7.74465	7.32202	6.88751	7.26236
ELOVL1	0.783434	0.0381982	0.307632	NA	5.15062	5.56078	5.45296	6.42004	5.87462	6.01953	5.67774	5.67201	5.67862
NPM3	0.362338	0.0382167	0.0872738	0.89851	8.97718	9.28665	8.98832	9.55294	9.41088	9.38242	8.93477	9.1125	9.43796
MRPL51	-0.348204	0.0382167	0.107141	0.837863	9.18243	8.95681	9.16922	8.61376	8.81591	8.84233	9.0907	9.08019	9.44
RB1	-0.603251	0.0382167	-0.211776	0.797052	6.71002	6.96313	7.38224	6.40081	6.53472	6.45237	6.76779	7.04086	6.6915
MAPKAP1	0.431266	0.0384701	0.166544	0.783676	7.26422	7.30518	7.15387	7.59497	7.68056	7.70953	7.50906	7.39616	7.29887
SMIM29	0.589877	0.0388359	-0.0904704	NA	6.22734	6.67507	6.40107	7.08231	6.9976	6.95048	6.03637	6.58387	6.40372
TBC1D7	0.874635	0.0391197	0.155158	NA	5.28628	5.22433	5.29573	6.34154	6.15079	5.65615	5.23672	4.98086	5.8606
PHTF1	-0.752862	0.0392245	-0.457009	NA	6.34078	6.04128	6.07303	5.44894	5.39807	5.53297	5.53522	5.86134	5.7854
DDX10	0.37398	0.0395849	0.212594	0.577985	7.80024	7.61799	7.77079	8.02363	8.15793	8.11587	7.97992	7.9726	7.87156
PTPRF	0.339894	0.0397823	-0.328773	0.166964	8.26599	8.22662	8.21039	8.69888	8.46638	8.54043	7.96331	7.94296	7.82225
RBFOX3	1.44608	0.0400938	-0.355816	NA	3.76888	3.56742	3.70555	4.91055	5.0393	4.42891	3.54896	3.60542	3.15683
TBRG1	0.507203	0.040361	0.297462	0.557812	7.12636	7.42542	7.44351	7.96592	7.45318	8.02164	7.33068	7.7782	7.73833
DDHD1	0.584471	0.040482	0.246874	NA	6.26067	6.14501	6.16684	6.59943	6.74357	6.88901	6.48719	6.40415	6.38686
MXD3	-1.29824	0.0405583	-0.127072	NA	4.91971	4.83525	4.73419	4.04188	3.34899	3.94008	4.65458	4.72635	4.7871
SH2B3	-0.54243	0.0406906	0.024308	0.980621	7.04261	6.80743	6.95785	6.49449	6.30932	6.45237	7.08677	6.91219	6.88403
NUTF2	0.282729	0.040814	0.0507174	0.934676	9.23997	9.4736	9.4782	9.61891	9.72936	9.6941	9.34258	9.42486	9.57638
ABLIM3	0.797359	0.0408938	0.18166	NA	5.18575	5.22433	5.45296	5.84011	6.10828	6.10851	5.47402	5.67201	5.18837
G2E3	-0.660119	0.0413537	0.660773	NA	6.68569	6.24177	6.13005	5.81128	5.59565	5.84925	6.98076	7.04086	7.01049
KYNU	-0.591549	0.041403	0.136425	0.897005	6.81472	6.78191	6.84885	6.40081	6.34637	5.97289	7.20448	6.79765	6.79737
EFL1	0.730672	0.0420994	0.109952	NA	5.34961	5.80836	5.79606	6.19296	6.19209	6.61305	5.75695	5.58258	5.93208
BBC3	0.573596	0.0421457	-0.193703	NA	6.2441	6.36719	6.38554	7.00801	6.74357	6.88901	6.01504	6.29579	6.12743
UBE2O	-0.485055	0.0421457	-0.236304	0.665916	7.30473	7.23169	7.33453	6.99524	6.72961	6.72984	7.0453	7.14864	6.98831
SLC25A4	-0.668832	0.042582	-0.359481	NA	6.61012	6.29686	6.66816	5.65774	6.10828	5.89999	6.03637	6.11626	6.40372
MKI67	-0.639564	0.0426935	-0.191042	0.862933	10.2394	9.81135	9.89488	9.49518	9.02747	9.5022	10.0093	9.92678	9.40484
RRM1	-0.278969	0.0429948	-0.211595	0.342007	9.30732	9.27983	9.43737	9.19101	8.98405	9.01913	9.10591	9.17247	9.12117
KDM4B	-0.572759	0.0432739	-0.156214	0.868824	6.79211	6.89335	7.03948	6.6162	6.04207	6.38272	6.84233	6.75735	6.6777
HGS	0.482165	0.0433498	0.0311597	0.971556	6.94346	7.00784	7.06894	7.49877	7.3291	7.59101	7.0453	7.24893	6.78455
DAPK3	0.767625	0.0433605	-0.159244	NA	5.63026	6.24177	5.77238	6.59943	6.36455	6.8764	5.08125	6.02868	5.97783
KDM5A	-0.332727	0.0434936	-0.24891	0.356646	8.44702	8.52848	8.51152	8.21192	8.14747	8.14245	8.28172	8.33853	8.12134
RPL32	0.209722	0.0437793	0.0776118	0.797052	12.0994	12.3054	12.2215	12.4007	12.4828	12.3759	12.2302	12.2446	12.3858
ROCK2	-0.341746	0.0437793	-0.207753	0.528759	9.03371	8.6743	8.70844	8.5009	8.42368	8.50809	8.69436	8.61146	8.51963
ZC3HAV1	-0.559401	0.0437793	0.137564	0.886856	6.88053	6.95173	6.77926	6.10063	6.30932	6.55091	6.93608	7.15899	6.90786
GTPBP4	0.282922	0.0439431	0.0189369	0.971551	9.0647	8.8287	8.89271	9.17695	9.1968	9.26636	8.98499	8.92514	8.9452
ASXL1	-0.364035	0.044519	-0.119198	0.83098	8.3302	8.22188	8.26231	7.91938	7.87694	7.94519	8.33433	8.00737	8.10081
NARF	-0.700477	0.044745	-0.00905153	NA	6.17585	6.31477	6.11129	5.411	5.56455	5.65615	6.3406	6.17861	6.04386
DPM3	0.4794	0.0450005	-0.252087	0.665916	7.02332	7.23169	7.0195	7.59497	7.64383	7.43633	6.78048	6.61427	7.10631
KIF1C	0.362475	0.0450286	-0.174742	0.712779	8.31838	8.17854	8.12881	8.75674	8.51193	8.42391	7.96331	8.19002	7.954
NDRG1	-0.500093	0.0450286	-0.718995	0.00497662	8.24949	8.55508	8.7962	7.87129	8.44945	7.74465	7.64715	8.06353	7.78412
ENSG00000173727	-0.693205	0.0450286	-0.199844	NA	6.10421	6.64707	6.33793	5.72113	5.87462	5.56477	6.11865	6.09485	6.33506
TMEM63A	-0.951239	0.0450286	0.165534	NA	5.25354	5.67609	5.32857	4.54063	4.56069	4.68181	5.73103	5.51973	5.47031
HES7	1.56327	0.0456429	0.686902	NA	2.72831	4.37099	3.09138	4.79746	4.79316	4.68181	3.86723	4.34644	3.88958
GLIPR1	0.61143	0.0457925	-0.108467	NA	6.27705	6.24177	5.86485	6.58246	6.71552	6.85084	5.92644	6.05108	6.12743
TK1	-0.45876	0.0463065	-0.171243	0.791218	7.35961	7.61799	7.53078	6.98236	7.05469	7.13122	7.27794	7.19966	7.51601
ENPP1	-0.526813	0.0463065	-0.631992	0.0327872	6.93316	7.18378	7.22538	6.68139	6.65773	6.48597	6.39114	6.61427	6.51653
TRMU	-1.04521	0.0476058	-0.0588891	NA	5.49675	5.10593	5.2277	4.3127	4.03375	4.73866	5.08125	5.45402	5.14892
SKP2	-0.575785	0.0477346	-0.148795	NA	6.63575	6.71607	6.88242	6.14753	6.10828	6.32819	6.54784	6.74367	6.51653
TET1	-1.43649	0.0482076	-0.210641	NA	4.59327	4.67814	4.52337	3.8282	3.02259	3.61516	4.41512	4.54886	4.30303
CKAP4	0.264268	0.0482641	-0.130345	0.699511	9.71006	9.68798	9.81599	10.1156	9.94097	9.94575	9.44779	9.64697	9.72129
SMC1A	-0.344614	0.0482641	-0.136803	0.780495	9.14052	8.81304	8.87892	8.57996	8.58739	8.663	8.88861	8.95216	8.58392
MEIS2	-0.803191	0.0482641	-0.227057	NA	6.19322	5.85805	5.72381	5.01541	5.12709	5.43315	5.88001	5.61301	5.67862
PCYOX1	-0.469367	0.0488871	-0.207285	0.739566	7.39005	7.31411	7.70976	7.08231	6.9976	6.99783	7.14683	7.40488	7.28073
ARGLU1	-0.40007	0.0494111	-0.22722	0.589258	8.11014	7.81327	7.93445	7.48969	7.58304	7.62157	7.66095	7.88803	7.64924
B4GAT1	-0.640227	0.0494111	-0.534466	NA	6.63575	6.63287	6.46155	5.84011	6.10828	5.949	5.97142	5.83577	6.35253
SLC1A3	-0.798548	0.0494111	0.309333	NA	5.84326	6.1845	5.6989	4.91055	5.16906	5.43315	6.21531	5.93545	6.43686
ENSG00000227400	-1.43878	0.0494111	-0.352352	NA	4.83373	4.43787	4.63263	3.09339	3.83952	3.61516	4.53981	4.48449	3.98229
SHANK1	0.775194	0.0494594	-0.542484	NA	5.38026	5.67609	5.39211	6.25852	5.82297	6.46927	4.95256	5.15639	4.88641
BACH1	0.580073	0.0494594	0.183916	NA	6.57079	6.16489	6.18489	6.98236	6.8506	6.79831	6.662	6.56843	6.22552
HSPA9	0.334826	0.0494594	0.0579073	0.942106	8.40291	8.17364	8.34491	8.71064	8.47477	8.73114	8.32135	8.32481	8.45639
TPD52L2	0.290771	0.0494594	0.127582	0.757371	8.88132	9.09274	8.82813	9.291	9.1968	9.18941	9.01484	8.999	9.17126
CCNE2	-1.18612	0.0494594	-0.56525	NA	4.87736	5.73046	4.73419	4.04188	4.20491	4.28362	4.53981	4.72635	4.7871
IGF2BP3	-0.455684	0.0495683	0.00598739	0.995068	7.65738	7.39208	7.55874	6.87498	7.0769	7.30129	7.67461	7.47282	7.48466
RPL39	0.269587	0.049762	0.167601	0.531803	10.4153	10.5492	10.4915	10.6472	10.8973	10.7076	10.6358	10.4714	10.8297
STK24	-0.409967	0.0499503	0.0142987	0.985801	7.58027	7.66062	7.75275	7.19822	7.33832	7.25332	7.61208	7.65932	7.76468
