# Supplementary material for: Inhibition of p38-MK2 pathway enhances the efficacy of microtubule inhibitors in breast cancer cells
Source: eLife. 2025 May 29;13:RP104859. doi: 10.7554/eLife.104859 (PMC12122001; doi:10.7554/eLife.104859)
Supplement: Figure 6—source data 2. [file elife-104859-fig6-data2.xlsx]

## Sheet: DESeq2_RPE1_CMPD1
GeneID	baseMean	log2FoldChange	lfcSE	stat	pvalue	padj	RPECMPD.count.mean	RPEctrl.count.mean	RPECMPD.fpkm.mean	RPEctrl.fpkm.mean
TMEM158	1855.06	2.14548	0.175717	12.2099	2.75e-34	3.85e-30	3558.75	675.772	94.7797	17.9978
UNG	567.309	-1.25479	0.115236	-10.8889	1.3e-27	9.11e-24	365.765	905.842	7.65393	18.9555
SLC5A3	1835.93	-1.31403	0.134817	-9.74682	1.9e-22	8.88e-19	1009.69	2657.1	4.30098	11.3184
UAP1	3210.36	1.23873	0.139458	8.88243	6.54e-19	2.29e-15	5034.26	2013.81	107.112	42.8469
BCOR	757.311	-0.999841	0.11359	-8.80217	1.34e-18	3.76e-15	529.856	1092.03	3.88874	8.01465
ATOH8	913.662	-1.58716	0.184672	-8.59448	8.36e-18	1.95e-14	389.251	1358.42	3.28706	11.4713
BTG3	1081.43	1.01613	0.118685	8.56162	1.11e-17	2.23e-14	1491.78	713.676	32.0846	15.3495
ADAMTS15	326.652	-1.87732	0.225073	-8.34091	7.37e-17	1.29e-13	120.647	603.507	1.05237	5.26426
ATAD3B	742.613	1.19269	0.143555	8.30829	9.71e-17	1.51e-13	1134.42	467.63	23.0851	9.51607
SSR3	12914.1	1.01809	0.122726	8.29563	1.08e-16	1.51e-13	18365.4	8750.91	197.669	94.1874
FZD4	677.769	-1.07713	0.130199	-8.27296	1.31e-16	1.66e-13	411.63	906.187	2.75629	6.06786
SIX3	1669.13	-1.4209	0.176116	-8.06797	7.15e-16	8.34e-13	852.466	2564.89	16.7285	50.3326
SPHK1	2112.66	0.903006	0.112543	8.02364	1.03e-15	1.11e-12	2875.35	1497.67	57.6591	30.0325
VIMP	1089.64	1.05363	0.131559	8.00876	1.16e-15	1.16e-12	1500.32	692.208	37.1595	17.1444
ZNF217	767.77	-0.918118	0.115877	-7.92319	2.31e-15	2.16e-12	531.238	1032.66	4.66759	9.07318
MPP3	250.588	1.56703	0.203635	7.6953	1.41e-14	1.23e-11	417.687	116.487	7.2945	2.03433
ODC1	8070.09	1.12129	0.145909	7.68482	1.53e-14	1.26e-11	11501.9	4988.23	216.856	94.0479
ZMYM3	1078.02	-0.987019	0.129164	-7.64158	2.15e-14	1.67e-11	748.644	1541.06	5.64166	11.6132
TPD52L2	4087.99	0.755358	0.0990541	7.62571	2.43e-14	1.79e-11	5139.24	2994.38	104.797	61.0599
FSTL3	1842.56	1.12935	0.148432	7.60855	2.77e-14	1.85e-11	2866.48	1233.58	56.5197	24.323
CXXC5	1405.8	-1.34367	0.176599	-7.60858	2.77e-14	1.85e-11	729.678	2071.13	24.9666	70.8659
SP1	1502.25	-1.02889	0.136609	-7.53163	5.01e-14	2.92e-11	1011.78	2159.83	6.50737	13.8912
ADGRG1	1247.83	-1.27245	0.16895	-7.53153	5.01e-14	2.92e-11	664.849	1766.35	6.55979	17.4278
ADAMTS6	481.713	1.37443	0.182225	7.54248	4.61e-14	2.92e-11	833.994	285.188	5.68127	1.94274
IL11	673.334	1.45799	0.193899	7.51931	5.51e-14	3.08e-11	1030.85	321.308	21.4624	6.6897
STC1	5412.62	1.02629	0.137991	7.43735	1.03e-13	5.53e-11	7403.23	3468.55	94.5416	44.2945
CDCP1	1302.06	1.36933	0.185133	7.39649	1.4e-13	7.25e-11	2166.75	739.353	17.1178	5.84103
IRS1	1470.17	-0.855073	0.116155	-7.3615	1.82e-13	9.09e-11	1029.26	1911.5	5.83324	10.8333
TROAP	2080.58	1.47128	0.200739	7.32934	2.31e-13	1.09e-10	3053.28	925.811	53.0047	16.072
AEN	1094.57	0.902693	0.123185	7.32791	2.34e-13	1.09e-10	1336.11	691.95	21.2296	10.9945
ADAMTS3	196.483	-1.18155	0.161531	-7.31473	2.58e-13	1.16e-10	118.068	290.015	1.00406	2.4663
SMG1P3	154.075	1.60152	0.219362	7.30083	2.86e-13	1.25e-10	247.888	63.6894	2.42935	0.624168
NRP1	12851.8	-0.787958	0.108232	-7.28027	3.33e-13	1.31e-10	9343.93	16475.1	78.225	137.926
SLC38A2	12542.9	-1.23744	0.16997	-7.28038	3.33e-13	1.31e-10	7270.16	18804.4	73.6997	190.626
NBEA	1147.86	-1.12695	0.154828	-7.27872	3.37e-13	1.31e-10	673.591	1574.63	2.97501	6.95456
CLIC1	10485.3	0.638392	0.0876244	7.28555	3.2e-13	1.31e-10	12711.1	8077.82	50.6792	32.2062
PMEPA1	676.435	-1.40961	0.19416	-7.26002	3.87e-13	1.46e-10	358.547	1104.58	3.21766	9.91267
DUSP4	3125.85	-1.24845	0.172433	-7.2402	4.48e-13	1.65e-10	1671.71	4378.72	11.2747	29.5317
METTL7A	111.829	-1.56647	0.216635	-7.23092	4.8e-13	1.72e-10	44.5363	168.588	0.650447	2.46221
SIX1	656.539	-1.31014	0.181484	-7.21904	5.24e-13	1.83e-10	370.259	1030.32	6.82237	18.9846
CAPN5	975.301	-0.814894	0.113135	-7.20285	5.9e-13	1.96e-10	693.152	1249.34	7.81738	14.0901
PLAUR	4998.7	1.1463	0.159142	7.203	5.89e-13	1.96e-10	7435.84	3123.2	183.069	76.8926
PBX1	546.928	-1.3355	0.187159	-7.13566	9.63e-13	3.14e-10	285.685	821.077	2.04902	5.88902
PXDC1	801.037	0.901764	0.126462	7.13073	9.98e-13	3.18e-10	1111.75	575.433	25.0881	12.9854
AHDC1	815.722	-1.12048	0.158175	-7.08385	1.4e-12	4.36e-10	522.145	1216.87	4.06601	9.47592
FAM117B	133.795	-1.42047	0.20089	-7.07088	1.54e-12	4.68e-10	64.7174	205.867	0.555031	1.76556
MGLL	3338.18	1.29042	0.1831	7.04763	1.82e-12	5.42e-10	5226.65	1902.05	53.8104	19.5823
ARPC5L	1268.14	1.15142	0.163684	7.0344	2e-12	5.83e-10	1844.02	767.315	89.0718	37.0636
PAPPA	1267.34	-1.39785	0.199879	-6.99347	2.68e-12	7.66e-10	651.657	2016.26	2.9411	9.09992
SOX9	2085.8	-1.03928	0.148992	-6.97542	3.05e-12	8.54e-10	1371.56	2981.46	17.2614	37.5225
SLC2A12	650.604	-1.26026	0.181149	-6.95704	3.48e-12	9.54e-10	337.218	904.541	2.98193	7.99863
SAMD4A	689.839	1.28747	0.185648	6.93502	4.06e-12	1.09e-09	1184.38	431.178	8.31644	3.02763
MAFK	871.059	0.974852	0.140611	6.93296	4.12e-12	1.09e-09	1270.99	617.339	18.7843	9.12381
ERCC6	1116.39	-1.07352	0.155071	-6.92275	4.43e-12	1.15e-09	687.933	1544.98	3.78738	8.50584
MAML2	609.463	-1.0954	0.158301	-6.91977	4.52e-12	1.15e-09	384.304	879.89	2.67573	6.12626
FNBP1L	835.798	-0.889468	0.12937	-6.8754	6.18e-12	1.5e-09	589.728	1131.09	5.29232	10.1506
MAB21L1	1318.29	-1.23535	0.179694	-6.87472	6.21e-12	1.5e-09	692.515	1816.42	11.7946	30.9364
EFTUD1	1060.32	0.816736	0.118733	6.87877	6.04e-12	1.5e-09	1411.91	780.659	18.97	10.4887
NAPEPLD	658.244	-0.957521	0.139482	-6.86485	6.66e-12	1.58e-09	433.631	881.64	2.00161	4.06959
FGF1	317.253	1.43305	0.208841	6.86192	6.79e-12	1.58e-09	557.821	172.079	5.4635	1.6854
LRRFIP2	1371.63	0.979637	0.143017	6.84981	7.4e-12	1.67e-09	1914.06	924.784	24.5064	11.8403
TMEM106B	3633.51	-0.835039	0.121872	-6.8518	7.29e-12	1.67e-09	2594.38	4763.95	19.7189	36.209
TLE3	1264.6	-1.1483	0.168332	-6.82165	9e-12	2e-09	771.519	1860.3	6.46333	15.5845
ITPR1	921.353	-0.871819	0.128015	-6.8103	9.74e-12	2.13e-09	617.558	1168.83	2.98532	5.65018
LYAR	527.311	1.30788	0.192188	6.80524	1.01e-11	2.17e-09	843.843	298.219	26.0306	9.19937
KIAA0355	649.877	-0.990515	0.145643	-6.80098	1.04e-11	2.2e-09	452.035	944.782	2.31108	4.8303
TUBA4A	962.141	-1.11088	0.16431	-6.76085	1.37e-11	2.87e-09	350.2	820.89	6.69443	15.6922
SDF2L1	440.58	0.947999	0.140566	6.74416	1.54e-11	3.17e-09	641.761	318.002	36.3546	18.0142
CCDC86	892.138	1.1201	0.166171	6.74063	1.58e-11	3.2e-09	1311.39	557.395	32.2221	13.6957
ANKRD13A	1482.68	0.88003	0.130673	6.73459	1.64e-11	3.29e-09	2167.49	1137.08	27.46	14.4056
VCAN	28997	-1.30783	0.194644	-6.71909	1.83e-11	3.6e-09	16592.8	47161.8	66.1661	188.064
MCC	762.524	-0.957997	0.142819	-6.70777	1.98e-11	3.79e-09	481.933	982.339	2.57509	5.24888
LFNG	62.4473	-1.56456	0.233193	-6.70929	1.96e-11	3.79e-09	24.479	99.0535	0.384141	1.55442
STK39	1419.32	0.827049	0.123747	6.6834	2.33e-11	4.42e-09	1928.38	1055.68	29.1617	15.9643
TMEM164	1094.87	-1.04469	0.156386	-6.6802	2.39e-11	4.45e-09	681.251	1498.5	5.90909	12.9978
TREX1	263.969	-1.14025	0.170788	-6.67638	2.45e-11	4.51e-09	164.96	395.656	3.84161	9.21409
ARSI	344.258	-1.2754	0.191571	-6.65762	2.78e-11	5.06e-09	180.51	499.101	2.82196	7.80258
MANF	1765.2	0.845487	0.127202	6.6468	3e-11	5.37e-09	2358.99	1271.88	121.282	65.3909
ARSJ	1024.72	1.06713	0.162825	6.55385	5.61e-11	9.93e-09	1645.21	731.712	17.4124	7.74422
SMURF2	2373.33	0.982759	0.150194	6.54328	6.02e-11	1.05e-08	3559.86	1706.38	45.5898	21.8531
IRF2BPL	3287.8	-0.979538	0.15036	-6.51463	7.29e-11	1.24e-08	2032.01	4233.11	24.2015	50.417
AMMECR1L	983.49	0.687138	0.105474	6.51475	7.28e-11	1.24e-08	1245.22	760.353	12.9032	7.87891
SNHG19	240.512	-1.63948	0.25179	-6.51129	7.45e-11	1.26e-08	96.1757	447.755	13.3381	62.0968
ECI2	2668.5	0.751191	0.115519	6.50276	7.89e-11	1.31e-08	3578.77	2078	112.643	65.4054
CABLES1	404.993	-1.06256	0.163455	-6.50063	8e-11	1.32e-08	252.936	567.657	2.38989	5.36355
LAMC1	10229.2	-0.743008	0.114344	-6.49803	8.14e-11	1.32e-08	7836.56	13411.4	49.1814	84.1684
SEMA4C	559.99	-1.00518	0.155223	-6.47572	9.44e-11	1.52e-08	378.077	805.038	5.26993	11.2212
GRIN2A	279.106	-1.35641	0.210314	-6.44944	1.12e-10	1.79e-08	130.805	403.175	0.437939	1.34984
LBH	1304.32	-1.32924	0.206947	-6.4231	1.34e-10	2.1e-08	683.162	2031.56	11.5125	34.2354
NCSTN	3032.63	-0.915125	0.142844	-6.40648	1.49e-10	2.3e-08	2124.99	4191.92	34.2255	67.516
CDR2L	790.599	0.877408	0.136969	6.40591	1.49e-10	2.3e-08	1104.64	578.193	15.4801	8.10264
NPIPB4	54.7945	1.54772	0.241913	6.39786	1.58e-10	2.4e-08	92.1889	22.4417	1.12727	0.274413
ATP1B1	1102.75	-0.944816	0.148199	-6.37531	1.83e-10	2.75e-08	816.944	1652.87	18.3852	37.1974
SLC7A5P2	78.4947	1.75909	0.276634	6.35889	2.03e-10	3.03e-08	149.643	20.2544	2.9215	0.395427
CNNM2	318.608	-0.852225	0.13445	-6.33858	2.32e-10	3.42e-08	210.152	393.95	2.32664	4.3615
SHISA2	797.015	-1.41024	0.223033	-6.32301	2.57e-10	3.66e-08	353.858	1183.34	6.06428	20.2796
CCNYL1	704.068	0.816115	0.129025	6.32527	2.53e-10	3.66e-08	893.546	491.675	11.3117	6.22427
PRR3	210.671	-1.13729	0.179861	-6.32315	2.56e-10	3.66e-08	131.988	319.976	0.274248	0.664856
EPB41L1	747.333	-0.80816	0.128122	-6.30774	2.83e-10	4e-08	529.327	956.49	3.87911	7.00952
SH3BP5L	1289.24	0.829345	0.132016	6.28216	3.34e-10	4.67e-08	1731.96	942.131	26.9486	14.6591
HMCN1	650.364	-1.31909	0.210057	-6.27968	3.39e-10	4.7e-08	356.289	1057.29	0.968596	2.87432
PDK2	757.876	-0.821582	0.13113	-6.26542	3.72e-10	5.1e-08	510.333	932.735	7.44895	13.6144
SEC11C	485.777	1.19278	0.190832	6.25045	4.09e-10	5.56e-08	655.898	253.819	39.4579	15.2694
SMAD6	140.63	-1.38725	0.222181	-6.24378	4.27e-10	5.75e-08	64.7546	212.152	1.06513	3.48961
RBFOX2	4099.09	-0.672273	0.107805	-6.23604	4.49e-10	5.94e-08	3305.85	5361.59	11.3963	18.4831
PTK7	2806.32	-0.749539	0.120205	-6.23553	4.5e-10	5.94e-08	2166.62	3734.41	24.1275	41.5862
KIF18A	1356.2	1.27918	0.20523	6.23288	4.58e-10	5.97e-08	1970.16	691.961	28.1674	9.89296
KCTD9	1431.18	0.728445	0.116889	6.23196	4.61e-10	5.97e-08	1776.17	1048.14	25.8569	15.2585
ITGB1BP1	1486.1	0.753528	0.121031	6.22589	4.79e-10	6.15e-08	1852.35	1071.18	47.5679	27.5076
ZNF362	465.693	-0.867253	0.139469	-6.21824	5.03e-10	6.4e-08	334.411	634.912	5.33061	10.1207
THBS1	28941.1	-1.22532	0.197098	-6.2168	5.07e-10	6.4e-08	17456.8	46648.9	119.312	318.831
MADD	696.951	-0.781419	0.125729	-6.21512	5.13e-10	6.41e-08	511.64	904.079	3.95065	6.98088
SIN3A	1331.6	-0.733727	0.118194	-6.20781	5.37e-10	6.65e-08	1049.96	1786.89	7.43586	12.6548
PPP1R9B	2068.97	-0.923113	0.148847	-6.20178	5.58e-10	6.85e-08	1431.49	2853.45	17.4825	34.8485
KCNJ2	363.889	-0.979189	0.15797	-6.19858	5.7e-10	6.93e-08	201.955	423.188	1.85646	3.89013
BCL9	490.879	-0.908844	0.146793	-6.19135	5.97e-10	7.2e-08	342.823	675.631	2.74117	5.40226
ALDH3B1	752.259	-0.872919	0.141053	-6.18857	6.07e-10	7.26e-08	498.941	952.673	8.27565	15.8015
NCKAP5L	696.577	-0.870027	0.140707	-6.18327	6.28e-10	7.45e-08	490.06	933.43	4.95165	9.43156
PTPRS	1512.83	-0.712176	0.115229	-6.18054	6.39e-10	7.51e-08	1165.7	1951.3	7.85548	13.1496
GATAD2B	631.868	-0.994726	0.161101	-6.17457	6.63e-10	7.61e-08	411.152	874.249	1.38356	2.94192
CDON	422.146	-1.22295	0.197981	-6.17709	6.53e-10	7.61e-08	234.322	628.033	1.42945	3.83123
ILF3-AS1	164.129	-1.10139	0.178376	-6.17451	6.64e-10	7.61e-08	105.806	249.127	2.60492	6.13348
SIX3-AS1	158.659	-1.33999	0.217341	-6.16538	7.03e-10	8e-08	78.7	243.052	3.33317	10.2939
JMJD6	658.668	0.846516	0.137526	6.15533	7.49e-10	8.46e-08	834.42	446.607	7.23132	3.87043
GLTP	1708.95	0.732065	0.119346	6.13396	8.57e-10	9.6e-08	2115.92	1243.69	44.4654	26.1356
ATP6V1A	1802.37	-0.872073	0.142211	-6.13225	8.66e-10	9.62e-08	1178.24	2250.74	12.7009	24.262
TPM4	27184.4	0.719409	0.11751	6.12212	9.23e-10	1.02e-07	36046.4	21397.8	594.298	352.787
DENND5A	2578.96	0.629918	0.103235	6.10178	1.05e-09	1.15e-07	3243.08	2064.2	32.3331	20.5799
TTC30B	124.773	-1.17956	0.193537	-6.09473	1.1e-09	1.19e-07	72.8875	187.129	1.36486	3.50411
PCGF2	485.292	-0.794511	0.130435	-6.09126	1.12e-09	1.21e-07	349.679	625.423	3.32427	5.94566
SRXN1	2008.49	0.759271	0.125062	6.07115	1.27e-09	1.36e-07	2493.17	1432.83	45.9048	26.3816
TANC1	1754.42	-0.834887	0.137564	-6.06909	1.29e-09	1.36e-07	1258.71	2330.68	8.29599	15.3612
CDK17	2105.23	0.851131	0.140305	6.06627	1.31e-09	1.38e-07	2806.26	1493.99	29.48	15.6945
RGMB-AS1	150.606	1.42845	0.235752	6.05914	1.37e-09	1.43e-07	278.905	79.4813	6.80233	1.9385
ITPKB	443.834	-1.03153	0.170438	-6.05224	1.43e-09	1.47e-07	261.119	578.092	2.09804	4.64486
ASIC1	415.133	-1.03713	0.171394	-6.05116	1.44e-09	1.47e-07	255.823	568.759	2.6744	5.94585
FBXL20	332.934	-1.12437	0.185838	-6.05029	1.45e-09	1.47e-07	187.987	456.317	0.896573	2.17633
NPTX1	225.591	-1.27322	0.210409	-6.05117	1.44e-09	1.47e-07	114.089	327.361	1.03892	2.98102
EEPD1	201.418	-1.08519	0.179394	-6.04921	1.46e-09	1.47e-07	115.007	268.345	1.21486	2.83463
CEP170B	2228.32	0.946109	0.156455	6.04715	1.47e-09	1.47e-07	3117.59	1527.19	22.6657	11.1031
MGAT2	2265.98	0.703764	0.116422	6.04494	1.49e-09	1.48e-07	2793.49	1677.85	51.0171	30.6422
PEX11B	430.661	-1.06653	0.17663	-6.03826	1.56e-09	1.54e-07	273.519	624.987	5.63314	12.8716
MAP3K1	72.1252	-1.2595	0.208967	-6.02727	1.67e-09	1.63e-07	39.4318	111.361	0.259924	0.734063
CDK2AP2	1035.49	0.672457	0.111674	6.0216	1.73e-09	1.67e-07	1249.42	768.941	34.5004	21.2329
C12orf75	4020.65	0.949464	0.157665	6.02203	1.72e-09	1.67e-07	5585.08	2726.09	202.431	98.8067
MPP4	349.399	1.05958	0.176163	6.01476	1.8e-09	1.73e-07	533.07	234.718	10.7374	4.72784
DNAJB11	1933.96	0.840476	0.139784	6.01269	1.82e-09	1.74e-07	2607.8	1400.48	76.3532	41.0043
HBEGF	826.625	1.13896	0.18968	6.00465	1.92e-09	1.81e-07	1298.8	527.484	27.2708	11.0755
TNFRSF12A	7071.09	0.873417	0.145492	6.0032	1.93e-09	1.82e-07	9653.85	5037.89	463.146	241.694
CEP55	6004.89	1.23941	0.206568	6	1.97e-09	1.84e-07	8912.65	3227.53	166.016	60.1192
ORAOV1	397.123	0.908343	0.151589	5.99213	2.07e-09	1.92e-07	538.684	272.467	10.5542	5.33834
NIFK	595.593	0.846367	0.141377	5.98659	2.14e-09	1.97e-07	803.626	429.178	22.893	12.226
NUF2	1940.43	1.06315	0.178205	5.96586	2.43e-09	2.21e-07	2685.89	1174.87	66.8576	29.2451
ZMIZ1	10348.6	-0.94006	0.157576	-5.96574	2.44e-09	2.21e-07	6753.85	13739.7	44.2603	90.041
VEZF1	1596.9	-0.68698	0.115372	-5.95449	2.61e-09	2.35e-07	1232.8	2025.93	13.1743	21.6501
PAPOLG	241.916	-0.959884	0.161221	-5.95383	2.62e-09	2.35e-07	158.509	328.147	1.06253	2.19967
ARHGEF11	947.156	-1.03167	0.173332	-5.95201	2.65e-09	2.36e-07	627.021	1388.43	4.50634	9.97849
PCDH18	141.453	-1.48506	0.249873	-5.94326	2.79e-09	2.47e-07	58.2837	234.758	0.486866	1.96103
FAT4	613.239	-1.33326	0.224575	-5.9368	2.91e-09	2.56e-07	322.7	1007.86	0.991378	3.09627
TFDP2	705.254	-0.781367	0.131681	-5.93379	2.96e-09	2.59e-07	516.71	916.921	2.52269	4.4766
DLEU2	133.633	1.04672	0.176864	5.91824	3.25e-09	2.83e-07	174.159	77.2347	3.11513	1.38148
SALL2	500.409	-1.09976	0.185891	-5.91614	3.3e-09	2.85e-07	308.625	733.357	2.8885	6.86368
VDR	484.4	-1.25844	0.21331	-5.89959	3.64e-09	3.13e-07	239.861	685.287	2.29881	6.56773
SBDS	1833.03	0.704322	0.119662	5.88593	3.96e-09	3.38e-07	2339.37	1402.69	72.1642	43.2698
NDRG4	768.151	-1.12794	0.191696	-5.88401	4e-09	3.4e-07	382.163	940.468	4.38903	10.801
ZNF608	239.058	-1.17027	0.198944	-5.88244	4.04e-09	3.41e-07	130.692	336.731	1.14626	2.95337
CNOT6L	595.561	-0.726062	0.123536	-5.87734	4.17e-09	3.49e-07	439.22	745.73	2.45302	4.16486
GPR176	3136.73	0.837568	0.142535	5.87624	4.2e-09	3.5e-07	4394.26	2360.14	45.5341	24.4562
PDRG1	563.591	0.666417	0.11346	5.87357	4.27e-09	3.53e-07	683.251	421.876	24.6381	15.2129
ATXN7L3B	1479.73	-0.932773	0.158915	-5.86965	4.37e-09	3.6e-07	1018.45	2062.08	13.6947	27.728
CCDC85C	1601.59	0.958817	0.163515	5.86377	4.52e-09	3.7e-07	2303.51	1110.49	20.1107	9.69512
MMP15	317.568	-0.961503	0.164323	-5.85128	4.88e-09	3.97e-07	195.303	406.143	2.1793	4.53197
SPOCD1	1620.67	0.912376	0.155983	5.84919	4.94e-09	4e-07	2374.88	1194.6	29.6773	14.9281
GPRC5C	1380.27	-1.16558	0.200266	-5.82018	5.88e-09	4.73e-07	691.215	1779.49	14.0601	36.1969
UBE2G2	1678.5	0.741318	0.127449	5.81657	6.01e-09	4.78e-07	2220.11	1291.36	31.4233	18.2778
CRTAP	6265.51	-0.56523	0.097164	-5.81728	5.98e-09	4.78e-07	5088.15	7618.88	37.8766	56.7155
COLGALT2	361.051	-0.885034	0.152297	-5.81125	6.2e-09	4.9e-07	238.209	462.785	2.01569	3.91604
ZNF512	366.747	-0.754482	0.129852	-5.81031	6.24e-09	4.9e-07	271.586	472.006	3.63121	6.3109
ID1	1148.39	-1.1531	0.198529	-5.8082	6.31e-09	4.91e-07	666.769	1688.62	26.7955	67.8607
AURKA	3881.62	1.28847	0.221821	5.80861	6.3e-09	4.91e-07	5488.27	1830.05	106.685	35.5739
IL1RN	194.106	-1.38885	0.239202	-5.80618	6.39e-09	4.94e-07	63.0404	225.891	1.47712	5.29293
TCEB3	1552.41	0.668412	0.115172	5.80362	6.49e-09	4.96e-07	1919.35	1183.49	19.2247	11.8542
RAB26	157.756	-1.34874	0.232386	-5.80387	6.48e-09	4.96e-07	76.8321	251.293	2.08324	6.8136
PPL	26.7706	-1.59393	0.274676	-5.80294	6.52e-09	4.96e-07	8.041	48.7127	0.0638208	0.386629
WNT5A	1744.49	-0.87623	0.151102	-5.79893	6.67e-09	5.05e-07	1208.71	2330.95	9.58267	18.4798
ACKR3	36.565	-1.63615	0.282304	-5.79571	6.8e-09	5.12e-07	7.80927	64.6123	0.184115	1.52333
PGM2	1096.31	0.642924	0.110985	5.7929	6.92e-09	5.18e-07	1391.99	875.672	21.2842	13.3894
MXD4	1495.87	-1.09031	0.188249	-5.79185	6.96e-09	5.18e-07	856.301	2029.94	11.2367	26.6375
MAB21L2	1399.34	-1.06756	0.184478	-5.78692	7.17e-09	5.31e-07	832.329	1926.59	14.8823	34.448
PLP2	3920.99	0.524054	0.0906368	5.78191	7.39e-09	5.44e-07	4685.59	3227.47	221.361	152.475
PGM5P2	197.2	1.26902	0.219625	5.77814	7.55e-09	5.53e-07	350.407	120.924	8.79759	3.036
TNFRSF1B	94.3005	-1.51725	0.263216	-5.76427	8.2e-09	5.92e-07	41.1344	183.877	0.554173	2.47724
PYGO2	783.674	-0.947425	0.16434	-5.76504	8.16e-09	5.92e-07	548.532	1127.95	8.54029	17.5615
PRR12	719.181	-0.852563	0.147906	-5.7642	8.2e-09	5.92e-07	538.852	1016.91	3.84256	7.25159
RARB	848.024	-1.13042	0.196552	-5.75125	8.86e-09	6.36e-07	512.507	1269.42	7.14975	17.7091
NPIPB3	288.966	1.36084	0.23693	5.74365	9.27e-09	6.62e-07	463.155	138.023	6.33454	1.88773
CDYL	612.917	0.866973	0.150997	5.74165	9.38e-09	6.66e-07	791.103	413.244	9.49756	4.96118
SNHG10	89.9724	-1.0764	0.187801	-5.73158	9.95e-09	7e-07	58.4057	136.068	1.4746	3.43539
NSUN2	2012.07	0.926661	0.161669	5.73186	9.93e-09	7e-07	2803.28	1387.21	41.16	20.3682
GRPEL1	728.141	0.736566	0.128545	5.73004	1e-08	7.03e-07	945.408	551.559	31.1221	18.1569
SMAGP	838.009	0.744003	0.130032	5.7217	1.05e-08	7.34e-07	1093.13	633.466	43.6814	25.3133
APOL6	323.373	-1.29197	0.225905	-5.71912	1.07e-08	7.42e-07	144.264	441.551	0.704467	2.15617
STK10	734.002	0.805886	0.14099	5.71591	1.09e-08	7.49e-07	960.384	528.624	7.89983	4.3483
PHF3	1462.71	-0.642244	0.112354	-5.71625	1.09e-08	7.49e-07	1138.77	1810.02	6.09131	9.68183
DAXX	1946.54	0.625045	0.109396	5.71358	1.11e-08	7.55e-07	2350.04	1498.35	8.89607	5.67201
FBN1	12772.2	-0.908918	0.159271	-5.70673	1.15e-08	7.82e-07	9411.79	18720	39.8446	79.2506
TP53BP1	1992.76	-0.680034	0.119261	-5.70208	1.18e-08	8e-07	1557.12	2550.54	12.1293	19.8676
KNSTRN	2753.79	1.15908	0.203337	5.70031	1.2e-08	8.05e-07	3927.86	1528.56	95.6569	37.2257
TRIM13	346.711	-1.10607	0.194329	-5.69171	1.26e-08	8.42e-07	192.619	467.429	1.28804	3.12569
NDEL1	941.989	0.7424	0.130587	5.68509	1.31e-08	8.68e-07	1228.48	713.026	24.999	14.5098
2025-03-04	1111.28	0.914621	0.160888	5.68485	1.31e-08	8.68e-07	1640.86	820.259	18.2561	9.12617
SPDL1	1937.93	1.05511	0.18568	5.68244	1.33e-08	8.77e-07	2745.93	1197	50.9757	22.2213
LINC00920	69.2997	-1.39451	0.24556	-5.6789	1.36e-08	8.91e-07	30.6458	111.572	1.66369	6.05701
GMPR	406.317	-1.06927	0.188347	-5.67714	1.37e-08	8.96e-07	250.045	581.192	8.17152	18.9935
FBXO46	229.037	-0.954502	0.168229	-5.67382	1.4e-08	9.09e-07	164.662	341.082	2.7266	5.64788
SMAD7	853.644	-1.23497	0.21776	-5.67124	1.42e-08	9.19e-07	434.526	1230.65	6.2467	17.6917
TRIM2	729.003	-0.742981	0.131058	-5.6691	1.44e-08	9.26e-07	515.272	888.863	3.47756	5.99892
DNAJC1	548.879	0.681855	0.12054	5.65668	1.54e-08	9.91e-07	714.969	435.462	16.929	10.3108
BAHCC1	702.856	-0.83744	0.148262	-5.64839	1.62e-08	1.03e-06	503.267	941.233	2.38349	4.45771
SBDSP1	706.807	0.847358	0.150015	5.64848	1.62e-08	1.03e-06	955.054	506.592	26.3281	13.9653
ZYX	7698.41	0.870412	0.154139	5.64693	1.63e-08	1.03e-06	10991.5	5712.74	235.99	122.654
MZT1	1856.12	0.874985	0.155222	5.63698	1.73e-08	1.09e-06	2395.85	1239.53	49.179	25.4436
BORA	598.647	1.17641	0.20896	5.62984	1.8e-08	1.13e-06	810.784	306.894	12.5877	4.76465
SNHG3	698.302	-0.830981	0.147931	-5.61736	1.94e-08	1.21e-06	554.373	1030.32	11.6996	21.7442
PVR	2879.4	0.877142	0.156174	5.61643	1.95e-08	1.21e-06	4213.67	2175.77	34.2226	17.6712
PARGP1	75.6923	1.22631	0.219452	5.58805	2.3e-08	1.42e-06	116.279	41.2386	3.97585	1.41004
RABGEF1	1160.51	0.566948	0.101521	5.58453	2.34e-08	1.44e-06	1426	950.449	13.0334	8.68695
GTPBP4	2067.14	0.848901	0.15214	5.57974	2.41e-08	1.48e-06	2896.63	1532.46	56.978	30.1442
ZNF772	194.849	-0.885983	0.158849	-5.57753	2.44e-08	1.49e-06	131.978	257.72	1.20581	2.35465
SPACA6P	102.302	-1.24426	0.223409	-5.56942	2.56e-08	1.56e-06	56.4732	162.738	1.42363	4.10248
SLC6A6	2421.45	-1.04652	0.188033	-5.56562	2.61e-08	1.58e-06	1544.92	3531.47	11.0871	25.3435
C11orf24	1272.34	0.830184	0.149189	5.56464	2.63e-08	1.58e-06	1787.1	960.685	42.0934	22.628
CCDC150	117.485	1.25609	0.225806	5.56269	2.66e-08	1.6e-06	176.995	59.9658	2.37805	0.805682
DSCAM	37.5976	1.55009	0.278808	5.55968	2.7e-08	1.62e-06	78.1757	13.7377	0.544453	0.0956761
PIGC	394.514	-0.857097	0.154291	-5.55506	2.78e-08	1.64e-06	276.798	526.642	9.13628	17.3829
RAP1B	2623.16	0.630279	0.113431	5.5565	2.75e-08	1.64e-06	3221.81	2043.5	74.1233	47.0143
NOL7	1207.27	0.694303	0.125016	5.55372	2.8e-08	1.64e-06	1536.04	925.283	87.0139	52.4156
TUBB	44687.9	-1.20722	0.217301	-5.5555	2.77e-08	1.64e-06	18558.3	51529.1	36.846	102.307
PLXNA4	1888.67	-0.999871	0.18002	-5.55422	2.79e-08	1.64e-06	1268.1	2763.87	4.07374	8.87884
SERPINB7	125.311	1.1977	0.215897	5.54757	2.9e-08	1.69e-06	185.516	67.9986	3.88044	1.42233
IKBIP	1902.21	0.862039	0.15571	5.53617	3.09e-08	1.8e-06	2461.96	1285.88	29.7372	15.5317
SELK	557.368	0.813223	0.146941	5.53436	3.12e-08	1.81e-06	719.663	392.457	43.5586	23.7539
CORO2B	1431.27	0.934295	0.169101	5.52508	3.29e-08	1.9e-06	1999.72	976.548	24.7704	12.0964
RGL1	797.166	-0.80176	0.145223	-5.52088	3.37e-08	1.93e-06	523.212	951.16	4.69965	8.54361
HS3ST3A1	516.121	1.07765	0.19532	5.51738	3.44e-08	1.97e-06	780.166	329.46	9.19895	3.88467
MAP3K7CL	136.887	1.20843	0.21969	5.50062	3.78e-08	2.15e-06	204.224	73.3934	2.60599	0.936532
YES1	2988.3	0.719484	0.130982	5.49298	3.95e-08	2.24e-06	3753.17	2214.29	39.6631	23.4004
PPP2R2D	1068.58	0.551664	0.100512	5.48852	4.05e-08	2.28e-06	1292.62	871	9.29127	6.26069
CRELD2	926.588	0.825244	0.15034	5.48917	4.04e-08	2.28e-06	1237.67	667.281	35.5234	19.1521
VASP	2785.06	0.704986	0.128592	5.48234	4.2e-08	2.35e-06	3602.23	2150.27	77.8812	46.4896
AHR	2330.49	-0.912812	0.166669	-5.47678	4.33e-08	2.42e-06	1482.96	2981.22	11.7532	23.6276
RASSF9	101.757	-1.35967	0.248512	-5.47123	4.47e-08	2.47e-06	42.4928	152.808	1.1714	4.21247
CSRNP3	106.252	-1.37291	0.250913	-5.47164	4.46e-08	2.47e-06	46.6978	170.276	0.192029	0.700204
SELT	3456.28	0.598342	0.109388	5.46993	4.5e-08	2.48e-06	4240.99	2756.23	60.1643	39.101
SLC9A3	43.2635	-1.44009	0.263598	-5.4632	4.68e-08	2.57e-06	16.108	70.6503	0.287185	1.25961
AZIN2	211.592	-1.14382	0.209554	-5.45834	4.81e-08	2.63e-06	118.019	304.066	2.2745	5.86006
ZNF503	605.585	-0.669167	0.122738	-5.45198	4.98e-08	2.71e-06	456.932	743.797	6.12258	9.96637
LRRFIP1	4097.66	0.648767	0.119062	5.44897	5.07e-08	2.75e-06	5185.75	3238.25	33.0309	20.6262
PLK2	11476.4	-1.08065	0.198342	-5.44843	5.08e-08	2.75e-06	6915.81	16513.3	120.65	288.084
NIPBL-AS1	168.89	-0.932109	0.171123	-5.44702	5.12e-08	2.76e-06	116.284	237.93	1.07936	2.20848
PIK3C2B	70.5286	-1.19201	0.21917	-5.43874	5.37e-08	2.88e-06	37.0359	101.627	0.241081	0.661531
PAPD7	1080.81	0.879293	0.161907	5.43083	5.61e-08	3e-06	1465.5	751.488	17.7532	9.10363
PHLDA1	9593.18	-0.825487	0.152219	-5.42301	5.86e-08	3.12e-06	6269.81	11652.8	52.4982	97.5707
ZNF836	45.067	-1.36756	0.252287	-5.42067	5.94e-08	3.15e-06	17.0714	65.0248	0.253589	0.965921
SEC61A1	14144.6	0.441328	0.081449	5.41845	6.01e-08	3.17e-06	16556.4	12114.8	225.445	164.964
SCLT1	688.618	1.06584	0.197519	5.39613	6.81e-08	3.58e-06	992.479	421.324	8.7684	3.72234
MED10	606.923	0.743076	0.137778	5.3933	6.92e-08	3.61e-06	741.117	428.15	35.6936	20.6206
KIF13B	816.556	-0.564369	0.104635	-5.39369	6.9e-08	3.61e-06	647.737	971.019	3.65843	5.48433
MAPKAP1	3863.83	0.655016	0.12164	5.38486	7.25e-08	3.77e-06	4877.62	3028.83	65.41	40.6172
NOP58	1806.95	0.844659	0.156884	5.38399	7.29e-08	3.78e-06	2469.16	1305.72	62.2134	32.8991
DDX31	358.903	0.831945	0.154637	5.37998	7.45e-08	3.85e-06	479.791	256.426	6.27435	3.35336
SCG5	1886.15	0.930655	0.173052	5.3779	7.54e-08	3.88e-06	2416.04	1177.75	48.0785	23.4368
AXIN2	74.7469	-1.20968	0.225017	-5.37593	7.62e-08	3.91e-06	37.9107	107.845	0.44352	1.26169
PTPRJ	2605.63	-0.890193	0.165708	-5.37206	7.78e-08	3.96e-06	1759.13	3471.39	9.6206	18.9849
ELMSAN1	595.356	-0.995346	0.185297	-5.37163	7.8e-08	3.96e-06	390.716	854.851	2.3428	5.12584
SEMA3D	284.963	-1.1938	0.222237	-5.37177	7.8e-08	3.96e-06	150.168	415.843	1.18806	3.28997
MGEA5	4205.5	0.455363	0.0849137	5.36266	8.2e-08	4.13e-06	4672.85	3383.59	44.4742	32.2037
ADM	1112.76	-0.895396	0.166954	-5.36313	8.18e-08	4.13e-06	709.628	1408.27	22.0969	43.8517
ORC6	967.65	1.09633	0.204561	5.35944	8.35e-08	4.19e-06	1429.55	584.713	41.9547	17.1603
CLDN12	1383.3	0.57381	0.107103	5.35757	8.44e-08	4.22e-06	1627.29	1077.04	21.9891	14.5537
PYCR1	1790.07	0.704621	0.13154	5.35671	8.47e-08	4.22e-06	2381.18	1419.87	51.3027	30.5911
SUOX	287.614	-0.937801	0.175491	-5.34388	9.1e-08	4.52e-06	192.108	396.052	3.86327	7.96456
MYL12A	7126.3	0.586298	0.109729	5.34313	9.14e-08	4.52e-06	8826.39	5785.23	296.472	194.321
TCP11L2	140.421	-1.35971	0.254705	-5.33837	9.38e-08	4.62e-06	56.3741	210.105	1.00799	3.75674
EBNA1BP2	1693.17	0.629444	0.117968	5.33572	9.52e-08	4.66e-06	2169.25	1374.65	65.4085	41.4491
MYO18A	2258.43	-0.762229	0.142858	-5.33558	9.52e-08	4.66e-06	1697.43	2989.24	11.0827	19.5172
NBPF15	722.689	0.718899	0.134798	5.33316	9.65e-08	4.71e-06	948.402	558.507	9.77839	5.75842
PPP2CB	2085.75	0.609432	0.11461	5.31744	1.05e-07	5.11e-06	2527.32	1626.11	63.5173	40.8678
EPM2AIP1	746.479	-0.699745	0.131643	-5.31546	1.06e-07	5.15e-06	562.18	938.981	3.74161	6.24942
ADRM1	2874.55	0.733662	0.138168	5.30994	1.1e-07	5.29e-06	3734.06	2171.37	124.916	72.6389
MTHFR	416.549	-0.948319	0.178704	-5.30665	1.12e-07	5.37e-06	256.893	537.32	1.77887	3.7207
FAM64A	1279.56	1.12832	0.212743	5.30367	1.13e-07	5.44e-06	1739.22	679.775	55.7706	21.7979
KDM5B	1327.67	-0.799615	0.150822	-5.30173	1.15e-07	5.46e-06	954.658	1737.57	7.40492	13.4777
DBP	139.685	-1.3647	0.257414	-5.30158	1.15e-07	5.46e-06	56.8387	216.041	1.5539	5.9063
ARHGEF40	1393.66	-0.815085	0.153842	-5.29821	1.17e-07	5.55e-06	998.543	1843.06	8.26038	15.2466
ANXA9	145.059	-1.04802	0.197887	-5.29605	1.18e-07	5.59e-06	83.8081	195.531	2.27488	5.30748
CALHM2	316.335	-0.932915	0.176349	-5.29015	1.22e-07	5.76e-06	199.887	412.931	5.07774	10.4897
SKI	1837.99	-0.80287	0.15196	-5.28344	1.27e-07	5.91e-06	1380.83	2520.42	11.9792	21.8656
FLJ10038	84.8702	-1.18046	0.223406	-5.28392	1.26e-07	5.91e-06	48.7088	133.468	0.40572	1.11172
PKP4	2288.46	0.876268	0.165851	5.28347	1.27e-07	5.91e-06	3145.84	1611.5	32.6456	16.7232
FOSL1	7809.95	0.899314	0.17025	5.28232	1.28e-07	5.93e-06	10515.4	5269.02	296.991	148.815
RHOC	8261.18	0.526906	0.0997735	5.28103	1.28e-07	5.95e-06	9990	6851.94	305.126	209.28
GNS	7618.36	-0.476673	0.0902772	-5.2801	1.29e-07	5.96e-06	6130.65	8605.04	59.191	83.0811
SETD1B	603.115	-0.833086	0.157822	-5.27865	1.3e-07	5.99e-06	449.989	843.498	2.71863	5.09604
NDE1	1059.73	0.976317	0.185108	5.27431	1.33e-07	6.11e-06	1442.39	669.134	8.91997	4.13804
NUP37	888.737	0.707882	0.13426	5.27249	1.35e-07	6.16e-06	1121.45	666.16	46.0776	27.3709
AGAP9	60.9309	1.1692	0.221833	5.27065	1.36e-07	6.18e-06	92.7408	34.3222	1.9236	0.711902
DNAJC2	627.909	0.900844	0.170915	5.27071	1.36e-07	6.18e-06	845.671	423.098	18.9284	9.47007
SLC20A1	13599.3	-0.871629	0.165585	-5.26394	1.41e-07	6.37e-06	8856.07	17231.5	129.84	252.632
RUNX2	779.3	-1.07555	0.20432	-5.26404	1.41e-07	6.37e-06	419.1	1010.5	3.59679	8.67227
RTCA	949.901	0.602245	0.11444	5.26254	1.42e-07	6.39e-06	1118.84	724.182	21.1187	13.6693
FGF5	2411.98	1.02795	0.195358	5.26188	1.43e-07	6.4e-06	3940.95	1735.02	34.2734	15.089
AGAP6	176.564	0.901793	0.171413	5.26093	1.43e-07	6.41e-06	247.689	123.64	4.42395	2.20832
FANCF	213.362	-0.791446	0.15046	-5.26016	1.44e-07	6.41e-06	155.08	280.799	2.32037	4.20142
KLHL18	649.828	0.649945	0.123777	5.25092	1.51e-07	6.72e-06	853.064	531.257	8.93687	5.56555
ZBED6	382.349	-0.990207	0.188652	-5.24885	1.53e-07	6.78e-06	256.72	561.303	4.32324	9.45251
S1PR2	135.838	-1.02478	0.195477	-5.24248	1.58e-07	6.99e-06	84.7616	193.222	1.17092	2.66923
METTL10	1048.77	0.738805	0.140958	5.24129	1.59e-07	7.01e-06	1343.18	777.116	18.1698	10.5124
IMPDH1	972.183	0.58405	0.111442	5.24085	1.6e-07	7.01e-06	1263.31	828.864	22.8691	15.0046
UBE2J2	1251.33	0.590513	0.112729	5.23833	1.62e-07	7.09e-06	1519.3	991.782	30.8664	20.1492
FTSJ1	1744.09	0.591245	0.112999	5.2323	1.67e-07	7.3e-06	2173.28	1417.85	48.9759	31.952
PPP1R12C	1594.35	0.771898	0.147549	5.23148	1.68e-07	7.31e-06	2053.89	1154.31	34.2965	19.275
DEPDC1B	689.894	0.932725	0.178492	5.22558	1.74e-07	7.52e-06	926.196	448.378	18.3133	8.86559
YIF1A	1287	0.610121	0.116926	5.21803	1.81e-07	7.81e-06	1542.11	991.155	68.1093	43.7757
MAPRE2	812.296	-0.57959	0.111085	-5.21754	1.81e-07	7.81e-06	634.231	963.493	6.43465	9.77521
PTPN12	2943.11	0.685579	0.131479	5.21435	1.84e-07	7.92e-06	3646.18	2204.8	54.754	33.1092
KLHL24	489.005	-1.09778	0.210678	-5.21071	1.88e-07	8.05e-06	229.784	573.502	1.5525	3.87478
KMT2E	1241.06	-0.906799	0.174121	-5.20787	1.91e-07	8.15e-06	857.716	1727.88	6.18767	12.4652
LYST	380.394	-0.977341	0.187885	-5.20181	1.97e-07	8.34e-06	241.324	522.271	0.714041	1.54532
FAM24B	31.6521	1.39136	0.267474	5.20186	1.97e-07	8.34e-06	53.5681	12.5488	3.43547	0.804791
LPCAT2	5080.59	-0.851194	0.163627	-5.20205	1.97e-07	8.34e-06	3350.92	6408.44	30.7917	58.8874
FAM120C	284.155	-0.911938	0.175381	-5.19975	2e-07	8.41e-06	198.916	401.786	1.16674	2.35666
ZNF827	667.925	-0.699804	0.134757	-5.19308	2.07e-07	8.69e-06	510.924	855.147	3.24434	5.43013
ADTRP	451.347	0.953575	0.183649	5.19237	2.08e-07	8.7e-06	610.278	288.944	16.2622	7.69955
TSPYL4	853.205	-0.896467	0.172739	-5.18972	2.11e-07	8.8e-06	586.075	1169.12	7.02418	14.0121
HYOU1	7855.43	0.719338	0.138634	5.18876	2.12e-07	8.82e-06	10438.2	6134.03	111.332	65.4241
ZNF264	220.978	-0.873287	0.168436	-5.18469	2.16e-07	8.99e-06	151.558	295.399	0.616929	1.20245
DLX1	106.765	-1.08385	0.209502	-5.17347	2.3e-07	9.51e-06	69.1889	168.366	1.43811	3.49954
SURF4	10606.7	0.55916	0.108162	5.16964	2.35e-07	9.68e-06	12811.3	8566.94	186.612	124.788
TMEM106A	145.985	0.909884	0.176128	5.16603	2.39e-07	9.84e-06	205.45	101.755	3.0528	1.51199
CDC20	6482.46	1.13167	0.219086	5.16539	2.4e-07	9.85e-06	9188.22	3532.5	271.752	104.478
ZNF598	1330.21	0.908684	0.175983	5.16348	2.42e-07	9.92e-06	1897.49	938.733	27.8853	13.7955
LINC00704	716.269	0.703	0.136193	5.16181	2.45e-07	9.98e-06	941.01	560.471	33.4217	19.9062
ARHGAP11A	3647.19	1.05083	0.203853	5.15482	2.54e-07	1.03e-05	5108.42	2169.92	20.1563	8.56184
SYNPO	1016.02	-0.914563	0.177463	-5.15355	2.56e-07	1.03e-05	684.113	1392.62	4.10505	8.35646
DBF4	1011.84	1.05235	0.204192	5.15374	2.55e-07	1.03e-05	1379.07	584.374	17.4759	7.40533
ZFP36L1	4308.76	-0.783453	0.152109	-5.1506	2.6e-07	1.04e-05	3043.78	5479.39	37.3018	67.1503
SMTN	5554.45	1.11946	0.217335	5.15083	2.59e-07	1.04e-05	8732.4	3418.04	112.298	43.9555
KLF9	1021.66	-1.10239	0.214037	-5.15048	2.6e-07	1.04e-05	554.806	1393.43	5.27433	13.2468
WDR43	1585.98	0.802368	0.156152	5.13839	2.77e-07	1.1e-05	2183.31	1192.69	30.6136	16.7235
MTA3	803.991	-0.670612	0.1305	-5.13879	2.77e-07	1.1e-05	615.645	1006.01	4.53315	7.40753
GLIS1	393.009	-0.828263	0.161222	-5.13741	2.79e-07	1.11e-05	272.114	510.232	4.78427	8.97083
ZDHHC18	652.484	0.648269	0.126336	5.13132	2.88e-07	1.14e-05	849.28	528.895	13.3954	8.3421
CDK8	341.323	0.775742	0.15118	5.13124	2.88e-07	1.14e-05	428.054	239.545	11.9803	6.70435
EIF5	6564.02	0.706314	0.137695	5.12957	2.9e-07	1.14e-05	8239.07	4890.06	65.0695	38.6201
VEPH1	2387.57	0.655247	0.127785	5.12773	2.93e-07	1.15e-05	3019.06	1869.93	29.3146	18.1568
TIMP3	2844.3	-1.16108	0.22646	-5.12709	2.94e-07	1.15e-05	1520.85	4135.13	13.7255	37.319
CPNE1	2179.36	-0.702071	0.137224	-5.11625	3.12e-07	1.22e-05	1723.64	2893.37	32.4357	54.4478
MAP2K6	38.8076	-1.40256	0.274368	-5.11197	3.19e-07	1.24e-05	16.0721	73.3253	0.425757	1.94241
NUP35	526.715	1.00808	0.197201	5.11194	3.19e-07	1.24e-05	740.734	329.452	18.2822	8.13128
PML	1343.52	-0.679366	0.133008	-5.10772	3.26e-07	1.26e-05	982.599	1618.81	6.31477	10.4034
CNTROB	1350.34	0.87783	0.171887	5.10701	3.27e-07	1.27e-05	1789.12	909.828	21.3807	10.8728
YWHAH	3408.07	0.759858	0.148981	5.10038	3.39e-07	1.31e-05	4567.07	2588.07	126.111	71.4649
C11orf80	480.277	0.758566	0.148889	5.09486	3.49e-07	1.34e-05	625.264	354.706	13.3092	7.55016
GLG1	5509.78	-0.580679	0.11407	-5.09053	3.57e-07	1.37e-05	4438.09	6753.73	23.2816	35.4292
CKS2	4440.99	1.05142	0.206577	5.08975	3.59e-07	1.37e-05	6092.34	2572.44	489.667	206.758
DOCK4	484.628	0.814485	0.160046	5.08905	3.6e-07	1.37e-05	678.771	366	4.03146	2.17381
LRRC59	5892.02	0.710628	0.139653	5.08853	3.61e-07	1.37e-05	7878.43	4657.02	133.813	79.0983
RBM5	1195.94	-0.858185	0.168693	-5.08725	3.63e-07	1.38e-05	880.324	1698.03	13.9206	26.8509
SESN3	929.48	-0.955187	0.187859	-5.0846	3.68e-07	1.39e-05	566.271	1205.97	2.8527	6.07531
ETS1	3306.17	0.599292	0.118033	5.07732	3.83e-07	1.44e-05	4202.88	2721.8	37.554	24.3201
SLC35F5	1354.15	0.624644	0.123097	5.07441	3.89e-07	1.46e-05	1617.49	1026.03	16.2538	10.3104
MOK	1179	0.92729	0.18283	5.07186	3.94e-07	1.48e-05	1673.39	809.814	21.8661	10.5818
FXR2	1612.05	0.484375	0.0955334	5.07021	3.97e-07	1.49e-05	1893.06	1339.92	31.378	22.2096
SPRYD7	394.751	0.627962	0.123887	5.06882	4e-07	1.49e-05	485.574	307.323	7.47079	4.72831
CREB3	1621.75	0.554949	0.1095	5.06802	4.02e-07	1.5e-05	1890.22	1267.7	50.5595	33.9085
ZKSCAN2	158.506	-0.935383	0.184608	-5.06686	4.04e-07	1.5e-05	106.782	222.541	0.741907	1.54619
PAK1IP1	623.604	0.764394	0.151029	5.06122	4.17e-07	1.54e-05	822.771	464.165	27.248	15.3719
BCL2L11	381.275	-1.21003	0.239191	-5.05886	4.22e-07	1.56e-05	173.623	517.4	1.3838	4.12375
PEG10	3502.23	-0.949717	0.187851	-5.05569	4.29e-07	1.58e-05	2528.72	5346.4	18.8893	39.9371
RPARP-AS1	104.853	-1.15649	0.228953	-5.05123	4.39e-07	1.61e-05	54.7088	150.195	1.70142	4.67101
PER3	505.819	-0.663565	0.131415	-5.0494	4.43e-07	1.62e-05	393.974	640.669	3.05447	4.96709
PXK	1396.8	-0.908042	0.179826	-5.04955	4.43e-07	1.62e-05	825.655	1678.49	12.6716	25.7603
MIDN	874.658	-0.757566	0.150125	-5.04625	4.51e-07	1.64e-05	627.974	1107.22	8.19703	14.4526
RASA2	735.875	0.671313	0.133059	5.04523	4.53e-07	1.65e-05	973.009	594.177	8.52339	5.20488
CDKN1B	1948.16	-0.592692	0.117563	-5.0415	4.62e-07	1.67e-05	1472.75	2264.12	28.9123	44.448
FRAT1	99.486	-1.08045	0.214413	-5.0391	4.68e-07	1.69e-05	56.746	139.631	1.0598	2.60778
AHCYL1	3422.34	-0.527874	0.104914	-5.03149	4.87e-07	1.76e-05	2793.28	4080.45	27.8375	40.6653
BMF	1589.99	-1.24889	0.248724	-5.02119	5.14e-07	1.84e-05	689.878	2221.31	7.15014	23.0224
MPC1	316.205	0.698969	0.139202	5.02124	5.13e-07	1.84e-05	379.674	226.456	13.173	7.85701
THSD7A	85.2292	-1.18847	0.236701	-5.02096	5.14e-07	1.84e-05	44.7243	129.047	0.209194	0.603606
VPS37C	542.539	0.64349	0.128216	5.01878	5.2e-07	1.86e-05	668.947	417.747	12.3031	7.68308
STX2	1315.07	0.544781	0.108634	5.01484	5.31e-07	1.89e-05	1623.16	1096.97	23.1997	15.6788
UCKL1-AS1	30.2178	1.34272	0.267726	5.01528	5.3e-07	1.89e-05	48.8119	11.8534	0.676758	0.164342
TTC30A	224.706	-0.888178	0.17716	-5.01341	5.35e-07	1.89e-05	153.979	306.944	1.63281	3.25487
PIM3	729.847	0.684998	0.1367	5.01094	5.42e-07	1.91e-05	937.843	565.65	19.5179	11.772
ADAMTS12	2807.34	-0.865001	0.172964	-5.00104	5.7e-07	2.01e-05	2073.63	4039.54	20.7198	40.3632
NET1	1336.31	-0.714785	0.142958	-4.99997	5.73e-07	2.01e-05	1086.62	1846.97	12.4075	21.0896
VHL	1057.19	-0.794885	0.158979	-4.99995	5.73e-07	2.01e-05	762.483	1391.33	8.27871	15.1065
GOLGA3	2338.83	0.579863	0.115991	4.99921	5.76e-07	2.01e-05	2786.17	1831.04	14.3902	9.45712
ID3	2610.17	-1.02636	0.205346	-4.99818	5.79e-07	2.02e-05	1498.63	3471.6	59.8854	138.725
DBNDD2	77.6344	1.04162	0.208443	4.99715	5.82e-07	2.03e-05	118.63	50.4234	2.584	1.09832
SETD8	1381.33	0.799544	0.16029	4.9881	6.1e-07	2.11e-05	1819.87	992.815	32.7527	17.868
UBALD2	863.612	0.734547	0.14727	4.98777	6.11e-07	2.11e-05	1088.48	628.967	33.9152	19.5975
DAP	3955.3	0.53114	0.106485	4.98791	6.1e-07	2.11e-05	4746	3239.33	100.332	68.4803
SDC3	2175.73	-0.907193	0.181935	-4.98636	6.15e-07	2.12e-05	1447.19	2942.86	13.9917	28.452
OSBPL6	309.93	0.846652	0.169797	4.98626	6.16e-07	2.12e-05	434.181	226.828	2.88273	1.50602
SLC30A1	629.969	-0.813489	0.163169	-4.98556	6.18e-07	2.12e-05	417.929	776.218	10.2536	19.0441
MORC4	1012.32	-0.846869	0.169963	-4.98268	6.27e-07	2.15e-05	704.741	1350.22	9.10071	17.4361
LRRN1	429.109	-0.749952	0.1506	-4.97977	6.37e-07	2.17e-05	297.704	522.749	3.85548	6.76996
SUFU	905.163	-0.723142	0.145261	-4.97822	6.42e-07	2.19e-05	675.883	1157.75	6.25951	10.7222
MAP1LC3B	3017.75	0.522335	0.105008	4.97425	6.55e-07	2.22e-05	3398.54	2335.73	73.5417	50.5434
KLHL9	1097.94	-0.785103	0.157837	-4.97415	6.55e-07	2.22e-05	800.919	1448.74	8.98774	16.2574
PTP4A1	4078.65	0.755639	0.151939	4.97331	6.58e-07	2.22e-05	4736.1	2686.01	46.0772	26.132
PWP1	1593.26	0.452125	0.0909706	4.97001	6.69e-07	2.25e-05	1906.74	1382.33	50.9464	36.9346
KCTD5	972.481	0.583258	0.117351	4.97021	6.69e-07	2.25e-05	1175.73	770.022	23.6247	15.4725
BBS12	196.612	-1.12673	0.226686	-4.97044	6.68e-07	2.25e-05	103.771	275.237	1.49701	3.97061
SLC35E2B	1561.69	-0.589637	0.118682	-4.96823	6.76e-07	2.26e-05	1212.03	1858.39	9.31372	14.2806
CHRNB1	688.115	0.848107	0.170781	4.96606	6.83e-07	2.28e-05	1001.99	522.263	20.3566	10.6104
PRELID1	1596.68	0.606241	0.122157	4.9628	6.95e-07	2.32e-05	2037.82	1310.7	79.2564	50.9768
NGFRAP1	3307.19	-0.793919	0.159994	-4.96218	6.97e-07	2.32e-05	2439.19	4449.95	89.1916	162.717
ZNF225	78.4542	-1.01481	0.204534	-4.96155	6.99e-07	2.32e-05	43.5153	100.172	0.788892	1.81603
ZPR1	721.831	0.674403	0.13604	4.95739	7.14e-07	2.35e-05	912.434	555.04	25.4078	15.4557
TRMT61A	566.555	0.876774	0.17685	4.95773	7.13e-07	2.35e-05	790.762	400.476	12.0799	6.1178
BCORL1	210.372	-0.859479	0.173349	-4.95809	7.12e-07	2.35e-05	149.324	289.723	1.006	1.95188
ADGRL2	834.028	-0.848996	0.171317	-4.95569	7.21e-07	2.37e-05	552.492	1062.7	4.40627	8.47535
WSB2	4142.03	0.546644	0.110325	4.95486	7.24e-07	2.37e-05	5083.09	3427.6	85.0512	57.3513
TUSC2	585.917	0.61494	0.124133	4.95387	7.28e-07	2.38e-05	699.128	446.461	20.5547	13.1262
BRD9	989.136	0.556866	0.112416	4.95364	7.28e-07	2.38e-05	1224.58	819.061	20.7351	13.8687
TAF13	589.177	0.801013	0.161788	4.95101	7.38e-07	2.4e-05	732.328	398.496	62.8387	34.1937
ARID5B	675.462	-0.999118	0.201821	-4.95051	7.4e-07	2.4e-05	418.801	942.78	2.52436	5.68268
NPIPB5	114.572	1.20575	0.243676	4.94816	7.49e-07	2.43e-05	173.324	57.5884	2.24878	0.747178
FLOT2	1539.1	-0.864084	0.17474	-4.94496	7.62e-07	2.46e-05	1158.95	2258.24	21.801	42.4798
DNAJC22	264.633	-0.879017	0.178126	-4.93481	8.02e-07	2.59e-05	176.761	350.82	1.98357	3.93683
RNF126	821.267	0.821604	0.16651	4.93426	8.05e-07	2.59e-05	1145.63	611.582	34.3761	18.3514
SYNJ2	4363.45	-0.503029	0.101959	-4.93362	8.07e-07	2.59e-05	3571.06	5121.26	23.3745	33.5214
RASSF5	70.1174	-1.10554	0.224221	-4.93061	8.2e-07	2.62e-05	38.309	98.6091	0.45528	1.17191
DDIAS	434.652	1.09113	0.221282	4.93093	8.18e-07	2.62e-05	652.767	258.959	9.07068	3.59843
KCNK2	908.979	-0.974252	0.197682	-4.92838	8.29e-07	2.64e-05	545.477	1195.77	7.08469	15.5308
E2F4	1269.6	0.660559	0.134051	4.92767	8.32e-07	2.65e-05	1637.93	1007.29	38.6164	23.7483
SERTAD3	229.019	-0.831057	0.168691	-4.9265	8.37e-07	2.66e-05	157.62	298.167	4.64791	8.79237
WDR45B	2321.43	0.514076	0.104406	4.92382	8.49e-07	2.69e-05	2774.62	1918.85	53.1013	36.7233
MTMR6	1968.66	0.722643	0.146783	4.9232	8.51e-07	2.69e-05	2501.28	1459.32	23.7422	13.8519
GJD3	226.22	-0.920599	0.18718	-4.91826	8.73e-07	2.75e-05	140.684	291.696	1.72367	3.57388
NOL4L	331.692	-1.07179	0.217986	-4.9168	8.8e-07	2.77e-05	189.033	467.134	1.34008	3.31158
OXSR1	2773.19	0.547204	0.111324	4.91543	8.86e-07	2.78e-05	3438.52	2317.45	37.6394	25.3677
PLEKHM3	309.57	-0.804867	0.163975	-4.90846	9.18e-07	2.87e-05	216.402	399.058	1.0925	2.01464
UBE2S	5342.82	1.1645	0.237505	4.90306	9.44e-07	2.95e-05	8263.01	2933.63	343.498	121.953
ST6GAL2	97.3404	-1.32645	0.270789	-4.89844	9.66e-07	3.01e-05	42.8314	172.312	0.300029	1.20702
PINX1	242.203	0.754058	0.154004	4.89637	9.76e-07	3.04e-05	325.408	184.747	10.2618	5.82606
BHLHE41	1281.27	-1.06461	0.21745	-4.89592	9.78e-07	3.04e-05	733.557	1796.76	9.60814	23.534
EHD4	1296.92	0.850239	0.173817	4.89159	1e-06	3.1e-05	1853.39	961.555	31.7186	16.456
ZNF713	34.4488	-1.27793	0.261359	-4.88955	1.01e-06	3.12e-05	14.8638	53.5959	0.162167	0.584742
SOX13	131.012	-0.9484	0.194169	-4.8844	1.04e-06	3.2e-05	90.7085	193.236	1.10263	2.34894
DIRC3	61.2149	1.25606	0.257241	4.88283	1.05e-06	3.22e-05	100.217	29.7642	1.2703	0.377276
MIIP	264.882	0.807619	0.165531	4.87897	1.07e-06	3.27e-05	331.82	179.042	9.12192	4.92196
SEC13	4193.78	0.447426	0.0917909	4.87441	1.09e-06	3.34e-05	4864.88	3538.06	110.792	80.5756
DSC2	131.888	-1.08085	0.222048	-4.86767	1.13e-06	3.45e-05	72.106	182.145	0.679483	1.71643
GAR1	891.02	0.722059	0.148408	4.86536	1.14e-06	3.48e-05	1123.82	655.334	43.9156	25.6085
ADAM22	312.858	-0.643599	0.132283	-4.86533	1.14e-06	3.48e-05	254.097	407.733	1.32287	2.12272
DUSP8	38.1367	1.30566	0.268537	4.86212	1.16e-06	3.53e-05	70.2495	18.5801	0.259191	0.0685528
RBM23	1047.09	-0.892678	0.183623	-4.86148	1.17e-06	3.53e-05	741.236	1491.13	14.0933	28.3513
HABP4	684.654	0.758243	0.156014	4.86009	1.17e-06	3.55e-05	873.119	492.994	16.2208	9.15886
RER1	2799.34	0.447166	0.0920295	4.85893	1.18e-06	3.55e-05	3252.42	2365.42	51.8779	37.7298
CHPT1	697.539	0.591569	0.121748	4.85897	1.18e-06	3.55e-05	839.713	546.168	26.5313	17.2566
SS18	2333.35	0.533659	0.109908	4.85551	1.2e-06	3.61e-05	2757.46	1877.1	38.3708	26.1204
TRIP13	1519.79	1.02106	0.210441	4.85201	1.22e-06	3.66e-05	2247.1	967.55	38.8868	16.7438
B3GNT2	434.339	0.7153	0.147492	4.84974	1.24e-06	3.7e-05	550.92	323.177	9.92227	5.82054
TNFRSF1A	4612.89	-0.623082	0.128496	-4.84904	1.24e-06	3.7e-05	3560.5	5618.47	79.1924	124.966
FAM207A	325.476	0.879519	0.181424	4.84787	1.25e-06	3.71e-05	475.62	239.333	26.7289	13.4501
BRIX1	732.337	0.779477	0.160788	4.84786	1.25e-06	3.71e-05	984.861	545.572	38.304	21.2188
CCNK	1266.04	0.579609	0.119606	4.84599	1.26e-06	3.74e-05	1507.95	990.048	28.649	18.8096
KANSL1	701.33	-0.695757	0.143708	-4.84147	1.29e-06	3.81e-05	528.212	885.314	1.43851	2.41102
CENPA	757.293	1.02787	0.212423	4.83876	1.31e-06	3.86e-05	1036.55	441.088	35.9134	15.2824
CREBL2	1374.1	-0.778168	0.160871	-4.83722	1.32e-06	3.88e-05	977.399	1763.83	12.6912	22.9028
DCTD	2705.58	0.465399	0.0962182	4.83691	1.32e-06	3.88e-05	3123.83	2240.5	75.7407	54.3234
CLIP3	962.368	-0.90681	0.187545	-4.83517	1.33e-06	3.9e-05	614.631	1258.75	8.38773	17.1779
MESDC1	601.777	0.947238	0.195938	4.83437	1.34e-06	3.91e-05	903.125	423.03	14.6556	6.86477
CCBE1	1746.97	0.780378	0.161496	4.83219	1.35e-06	3.95e-05	2514.44	1391.28	19.8868	11.0037
VPS36	717.594	0.558206	0.11558	4.82962	1.37e-06	3.98e-05	861.18	574.956	8.90693	5.9466
TUBB3	7260.81	-0.786228	0.162796	-4.82953	1.37e-06	3.98e-05	3393.3	6179.69	83.7507	152.522
C1orf109	444.919	0.754089	0.156265	4.82571	1.4e-06	4.05e-05	573.783	324.758	11.1361	6.30299
ZFAND2A	298.022	0.718096	0.148957	4.82082	1.43e-06	4.14e-05	381.834	223.142	20.982	12.2618
LOC728392	450.296	-0.933425	0.193665	-4.81979	1.44e-06	4.16e-05	276.807	584.449	9.1794	19.3814
INSR	251.723	-0.800582	0.166166	-4.81798	1.45e-06	4.18e-05	189.335	348.149	1.03478	1.90275
NRDE2	226.83	-0.760163	0.157856	-4.81556	1.47e-06	4.23e-05	176.651	313.22	2.18107	3.86726
GATSL3	166.764	-0.999978	0.207711	-4.81427	1.48e-06	4.25e-05	102.474	232.887	3.12796	7.10873
BTBD6	1053.08	0.56232	0.116882	4.81101	1.5e-06	4.31e-05	1300.07	864.955	32.3941	21.5523
BMP4	631.126	-1.04661	0.217644	-4.80882	1.52e-06	4.35e-05	374.272	902.255	8.93462	21.5386
HJURP	2651.02	1.04125	0.216585	4.80757	1.53e-06	4.36e-05	3708.05	1547.92	57.569	24.032
SLC35B1	936.996	0.581085	0.120901	4.80629	1.54e-06	4.38e-05	1124.16	736.886	34.5485	22.6466
SNAPC1	599.682	0.763116	0.158816	4.80503	1.55e-06	4.4e-05	758.773	426.284	14.1443	7.94636
ST5	1197.28	-0.682138	0.142027	-4.80289	1.56e-06	4.42e-05	884.941	1468.49	9.3122	15.4528
PMM2	950.882	0.695104	0.144719	4.80312	1.56e-06	4.42e-05	1206.2	719.503	25.7081	15.3349
SLC29A1	2262.36	-0.991998	0.206512	-4.80359	1.56e-06	4.42e-05	1527.66	3435.84	25.3384	56.9884
IRF2	338.011	-0.780453	0.162568	-4.80078	1.58e-06	4.46e-05	240.873	436.179	5.21687	9.44683
RAB2B	296.159	-0.870486	0.181368	-4.79955	1.59e-06	4.48e-05	203.311	401.248	3.35311	6.61758
LDOC1L	2151.45	-0.690949	0.144025	-4.79743	1.61e-06	4.52e-05	1619.96	2706.76	15.0648	25.1715
ADIPOR1	2236.62	0.443103	0.0924123	4.79485	1.63e-06	4.57e-05	2562.52	1869.34	52.3614	38.1972
DHX40	1268.74	-0.730484	0.152386	-4.79365	1.64e-06	4.58e-05	919.2	1591.07	12.4107	21.4821
TLK2	1066.94	0.554022	0.115674	4.78949	1.67e-06	4.67e-05	1250.05	837.158	11.2263	7.51825
CDR2	951.684	0.624536	0.13046	4.78717	1.69e-06	4.72e-05	1179.2	745.952	21.6073	13.6686
FAM65A	2540.64	0.759032	0.158583	4.78633	1.7e-06	4.73e-05	3367.03	1896.54	37.2106	20.9595
EAPP	529.044	-0.685065	0.143171	-4.78493	1.71e-06	4.75e-05	385.134	641.227	14.1455	23.5515
IFT140	541.121	-0.731149	0.152821	-4.78436	1.72e-06	4.75e-05	387.301	670.717	3.63999	6.30364
AUP1	1996.64	0.512339	0.10711	4.78329	1.72e-06	4.77e-05	2406.09	1664.53	62.3374	43.1249
PTTG1	3173.71	0.781633	0.163577	4.77839	1.77e-06	4.88e-05	3994.19	2202.77	170.478	94.0175
RBM4	821.543	-0.820127	0.171655	-4.77778	1.77e-06	4.88e-05	565.557	1063.46	6.62119	12.4503
ACTR3	8373.69	0.577452	0.120894	4.77653	1.78e-06	4.9e-05	10540.7	6927.23	88.7393	58.3184
ID2	134.57	-1.28914	0.269994	-4.7747	1.8e-06	4.94e-05	43.2192	175.666	1.56877	6.37633
ZNF549	99.5066	-0.950251	0.199092	-4.77293	1.82e-06	4.97e-05	65.0494	139.773	0.781516	1.67926
GNL2	1264.78	0.630697	0.132185	4.77134	1.83e-06	4.98e-05	1621.63	1020.91	33.4254	21.0431
FAM216A	483.686	0.664532	0.13927	4.77154	1.83e-06	4.98e-05	635.121	388.965	20.674	12.6613
NR2F1	3800.56	-0.886329	0.185763	-4.7713	1.83e-06	4.98e-05	2667.02	5355.44	35.439	71.1623
STON1	196.039	-1.21915	0.255747	-4.76702	1.87e-06	5.08e-05	90.1121	292.82	0.792028	2.57371
BRWD3	308.003	-0.815772	0.171221	-4.76445	1.89e-06	5.14e-05	223.582	418.594	0.865292	1.62001
SMARCAD1	1016.96	-0.721266	0.15147	-4.76178	1.92e-06	5.19e-05	791.54	1358.6	6.63892	11.3951
CD276	2531.17	-0.59837	0.125733	-4.75906	1.94e-06	5.25e-05	1984.73	3071.51	28.8929	44.7139
PPP4R3A	1619.44	0.599466	0.126469	4.74003	2.14e-06	5.76e-05	1842.61	1189.31	19.7764	12.7647
PPAPDC2	187.471	-0.792852	0.167287	-4.73946	2.14e-06	5.77e-05	124.148	228.012	2.06332	3.78952
PEAK1	1084.1	-0.738422	0.155897	-4.7366	2.17e-06	5.83e-05	848.411	1479.22	3.55465	6.19757
EPB41L3	1014.32	0.743282	0.156916	4.73683	2.17e-06	5.83e-05	1432.95	818.047	13.4367	7.67082
CRK	2217.59	0.535078	0.113034	4.73379	2.2e-06	5.9e-05	2616.48	1777.79	21.3767	14.5246
SCML1	417.4	0.947023	0.200156	4.73143	2.23e-06	5.95e-05	569.183	264.596	9.59501	4.46042
ZFP37	64.6545	-1.1793	0.24938	-4.72892	2.26e-06	6.02e-05	30.5563	93.0609	0.512659	1.56133
CBX2	101.302	-0.917891	0.194327	-4.72345	2.32e-06	6.17e-05	76.9907	159.062	0.76298	1.57631
CHST2	570.924	-0.837387	0.177401	-4.72031	2.35e-06	6.25e-05	366.35	701.835	4.38438	8.39938
EDEM3	1127.05	-0.640106	0.135648	-4.71887	2.37e-06	6.29e-05	883.012	1415.86	6.59203	10.5699
INPP5A	701.535	0.632259	0.13407	4.71588	2.41e-06	6.36e-05	888.177	557.559	14.9674	9.39586
FNDC4	484.707	0.72157	0.153009	4.71587	2.41e-06	6.36e-05	603.964	351.301	17.895	10.4088
PNO1	666.597	0.895965	0.190112	4.71282	2.44e-06	6.44e-05	901.632	443.174	22.5456	11.0817
TSPAN9	1144.92	-0.786716	0.167014	-4.71048	2.47e-06	6.5e-05	803.527	1466.57	9.14342	16.6883
BLZF1	499.886	0.692187	0.147034	4.70766	2.51e-06	6.57e-05	593.34	354.123	12.6842	7.5703
ODF2	1827.22	0.791664	0.168154	4.70798	2.5e-06	6.57e-05	2414.87	1316.87	24.596	13.4126
RNMT	840.526	-0.716262	0.152228	-4.7052	2.54e-06	6.63e-05	609.785	1043.34	4.8313	8.26632
SMS	5152.49	0.633732	0.134706	4.70456	2.54e-06	6.64e-05	6374.88	3997.99	171.628	107.636
RBMS1	1540.68	-0.792338	0.168464	-4.70332	2.56e-06	6.66e-05	1136.27	2084.8	13.1258	24.0829
IRF1	685.351	-0.911594	0.193822	-4.70325	2.56e-06	6.66e-05	421.607	874.006	5.87338	12.1757
VDAC3	2723.66	0.431395	0.0917639	4.70114	2.59e-06	6.72e-05	3134.13	2305.63	100.761	74.1254
CIRH1A	1224.35	0.638417	0.135815	4.70062	2.59e-06	6.72e-05	1601.36	1000.45	20.3815	12.7334
CAV1	11035.7	-0.568897	0.12106	-4.69929	2.61e-06	6.75e-05	9100.12	13763.4	123.169	186.285
THAP4	1271.38	0.658856	0.140217	4.69882	2.62e-06	6.76e-05	1606.14	985.942	34.3058	21.0589
OTX2	465.422	-0.990442	0.211046	-4.693	2.69e-06	6.93e-05	270.059	614.155	5.46414	12.4263
CCNE2	211.55	-1.22529	0.261089	-4.69299	2.69e-06	6.93e-05	128.482	415.306	2.33354	7.54292
NIP7	959.136	0.792928	0.16915	4.68771	2.76e-06	7.09e-05	1313.21	715.206	28.037	15.2696
DDX21	5688.55	0.885835	0.189066	4.68533	2.8e-06	7.16e-05	8314.52	4127.83	81.9869	40.7033
AZIN1	3801.64	0.571691	0.122111	4.68175	2.84e-06	7.28e-05	4660.64	3074.59	52.6227	34.7148
SGK223	184.035	-1.18761	0.253733	-4.68054	2.86e-06	7.31e-05	76.7824	241.982	0.804387	2.53505
MEX3D	764.488	0.935984	0.200067	4.67836	2.89e-06	7.36e-05	1093.05	513.271	18.9887	8.91661
PCGF3	1035.34	0.47499	0.101536	4.67804	2.9e-06	7.36e-05	1202.83	855.902	10.5124	7.48035
GAB1	344.929	-0.725044	0.154968	-4.67867	2.89e-06	7.36e-05	243.17	420.696	1.52206	2.63324
KLF16	1034.91	0.71498	0.152895	4.67627	2.92e-06	7.41e-05	1373.9	803.145	23.5617	13.7735
EPHA3	28.8499	-1.30952	0.280147	-4.6744	2.95e-06	7.46e-05	9.32624	45.9713	0.0691859	0.341034
FOXJ3	927.492	-0.746992	0.159873	-4.6724	2.98e-06	7.51e-05	700.297	1232.4	6.0007	10.5602
MYEF2	2261.87	0.774559	0.165779	4.67223	2.98e-06	7.51e-05	3015.09	1669.32	21.6597	11.992
YKT6	3794.76	0.497642	0.106546	4.67069	3e-06	7.56e-05	4432.72	3099.9	79.3443	55.4872
LRIG3	257.959	-0.881076	0.188673	-4.66986	3.01e-06	7.57e-05	174.995	351.272	2.06288	4.14087
CIPC	377.256	-0.623965	0.133622	-4.66962	3.02e-06	7.57e-05	286.883	454.009	3.26672	5.16979
UBA7	398.196	-0.855948	0.183352	-4.66834	3.04e-06	7.6e-05	260.933	510.792	3.89947	7.63344
LOXL1-AS1	522.264	-0.749169	0.160493	-4.66793	3.04e-06	7.6e-05	419.293	738.926	7.29938	12.8638
ZNF792	47.8414	-1.1517	0.246832	-4.66591	3.07e-06	7.65e-05	26.3798	76.1339	0.335925	0.969503
UGDH	2765.26	0.573845	0.12298	4.66617	3.07e-06	7.65e-05	3228.8	2126.15	50.0186	32.9371
KRT80	1377.28	-0.769804	0.165034	-4.66451	3.09e-06	7.69e-05	1091.73	1962.75	13.8809	24.9555
MYBL1	967.403	0.907798	0.194787	4.66047	3.15e-06	7.83e-05	1394.55	675.232	13.2983	6.43896
KIAA1644	379.219	-0.958242	0.205695	-4.65856	3.18e-06	7.89e-05	217.656	478.013	1.59862	3.51085
ORAI3	866.146	-0.752142	0.161479	-4.65783	3.2e-06	7.9e-05	565.26	1000.92	12.7908	22.6491
TSHZ1	286.728	-0.617602	0.1328	-4.65063	3.31e-06	8.17e-05	226.326	355.844	2.08281	3.27472
SNAPC4	489.872	0.6278	0.135052	4.64859	3.34e-06	8.23e-05	625.044	393.625	6.65511	4.19109
FBXO32	2958.17	-1.01816	0.21908	-4.64742	3.36e-06	8.27e-05	1499.44	3555.21	10.6879	25.3412
ANKRD10	789.87	-0.568969	0.122464	-4.64602	3.38e-06	8.31e-05	618.752	936.247	9.89814	14.9771
UBE2Q2	1285.32	0.50263	0.108311	4.64062	3.47e-06	8.51e-05	1461.57	1018.22	20.4415	14.2408
PLAG1	239.741	-0.926724	0.199865	-4.63676	3.54e-06	8.66e-05	152.887	324.07	1.03155	2.18655
NOTCH1	710.664	0.778252	0.167854	4.63647	3.54e-06	8.66e-05	917.819	505.448	4.88883	2.69231
SMG1P1	54.6995	1.27484	0.275071	4.63458	3.58e-06	8.72e-05	85.1689	20.4722	0.841668	0.202313
RHOJ	689.57	-0.64763	0.139801	-4.63251	3.61e-06	8.79e-05	553.227	893.692	7.56855	12.2263
CD274	253.77	0.999405	0.215825	4.63063	3.65e-06	8.86e-05	418.762	182.506	5.62482	2.45143
TNIP2	661.033	0.592557	0.127993	4.62962	3.66e-06	8.89e-05	812.273	526.384	19.7234	12.7815
C3orf52	313.928	0.806868	0.174329	4.62842	3.68e-06	8.92e-05	443.828	238.088	9.525	5.10961
PIM1	364.42	-0.782668	0.169111	-4.62814	3.69e-06	8.92e-05	268.895	490.163	4.9144	8.95838
NDRG3	943.51	-0.552488	0.119645	-4.61773	3.88e-06	9.36e-05	776.582	1160.32	12.7146	18.9974
KBTBD7	97.4099	-0.936408	0.202805	-4.61728	3.89e-06	9.37e-05	61.2236	131.461	1.01311	2.17537
ADAMTS1	1763.69	1.02205	0.221512	4.61396	3.95e-06	9.5e-05	2835.86	1195.99	30.1881	12.7315
CEP128	439.074	1.03542	0.224528	4.61156	4e-06	9.59e-05	658.619	271.94	7.31626	3.02084
RAE1	918.844	0.496865	0.107772	4.61034	4.02e-06	9.63e-05	1060.47	741.702	24.1955	16.9226
SAPCD2	2160.7	1.04348	0.226349	4.61005	4.03e-06	9.63e-05	3230.16	1318.21	41.7236	17.0272
KANK1	506.7	-0.830704	0.180254	-4.60851	4.06e-06	9.69e-05	376.357	717.93	2.7828	5.3084
IL13RA2	26.5363	1.31947	0.286563	4.60445	4.14e-06	9.86e-05	52.2623	7.77347	1.88458	0.280312
FOPNL	1585.45	0.656006	0.142517	4.603	4.16e-06	9.9e-05	1880.82	1155.91	19.3196	11.8734
THRA	783.926	-0.718444	0.156084	-4.60293	4.17e-06	9.9e-05	574.374	987.295	8.1343	13.9821
KANK2	4979.3	-0.778597	0.169205	-4.6015	4.19e-06	9.95e-05	3584.27	6512.87	33.918	61.6315
FPR1	47.2124	-1.21473	0.264046	-4.60046	4.22e-06	9.97e-05	18.7063	65.4637	0.675536	2.36407
TLR1	34.7218	-1.21054	0.263134	-4.60048	4.22e-06	9.97e-05	15.8936	54.2673	0.276009	0.942407
LYPLA2	1379.42	-0.774779	0.168471	-4.59888	4.25e-06	0.000100135	973.26	1762.11	29.6715	53.7211
PDGFRA	125.315	-1.09069	0.237171	-4.59876	4.25e-06	0.000100135	68.212	180.908	0.513722	1.36246
MALAT1	2914.51	0.987854	0.214958	4.59557	4.32e-06	0.000101167	3692.52	1614.26	20.8912	9.133
KXD1	1969.08	0.460521	0.100205	4.59578	4.31e-06	0.000101167	2280.55	1640.1	69.3983	49.9091
PPP2CA	4872.15	0.559429	0.12172	4.59605	4.31e-06	0.000101167	5882.93	3915.91	110.203	73.3555
CLCN3	3463.19	-0.584197	0.127195	-4.59293	4.37e-06	0.000102285	2504.15	3839.36	18.5907	28.5033
LTV1	836.85	0.772919	0.168326	4.59179	4.39e-06	0.000102676	1135.5	628.242	30.9918	17.147
TCERG1	1766.34	0.781062	0.170125	4.5911	4.41e-06	0.000102844	2392.48	1313.46	28.1964	15.4797
PHF23	1193.72	-0.512411	0.111644	-4.5897	4.44e-06	0.000103362	959.301	1387.77	21.767	31.4891
IKBKE	519.345	-0.894924	0.195012	-4.58907	4.45e-06	0.000103506	332.384	681.235	4.73705	9.70877
LCTL	248.364	-1.0577	0.230558	-4.58756	4.48e-06	0.000104083	142.062	357.906	2.35946	5.94435
PNP	1543.25	0.868167	0.189293	4.58636	4.51e-06	0.000104348	2222.76	1118.49	45.4564	22.8737
HBP1	1037.16	-0.832271	0.181468	-4.58633	4.51e-06	0.000104348	665.534	1277.1	11.4294	21.932
GPAT4	2939.23	0.490163	0.106932	4.5839	4.56e-06	0.000105397	3449.34	2424.68	27.0648	19.0249
BTBD10	957.332	0.622516	0.135838	4.58278	4.59e-06	0.000105787	1140.27	720.844	19.3208	12.214
HLF	24.8176	-1.27609	0.278592	-4.5805	4.64e-06	0.000106694	9.66439	42.5045	0.0854597	0.375857
BAZ2B	559.876	-0.634597	0.138549	-4.58031	4.64e-06	0.000106694	415.602	664.303	1.91893	3.06724
FMN2	811.419	0.750799	0.163966	4.579	4.67e-06	0.000107078	1133.33	640.053	8.71165	4.91994
PDCD5	1412.53	0.543777	0.118758	4.57887	4.67e-06	0.000107078	1752.52	1181.32	143.656	96.8337
RARG	1229.57	-0.735791	0.160771	-4.57665	4.72e-06	0.000108015	845.033	1477.52	12.1941	21.3211
SERPINE2	4558.37	-0.723164	0.158021	-4.57637	4.73e-06	0.000108015	3185.74	5504.25	51.731	89.3795
SLAIN2	1560.54	0.464313	0.101527	4.57328	4.8e-06	0.000109438	1833	1314.78	15.0977	10.8294
LOC100129034	2348.57	-0.743737	0.162654	-4.57252	4.82e-06	0.000109662	1690.7	2976.19	14.6547	25.7971
CD109	2605.62	-0.532599	0.116551	-4.56968	4.88e-06	0.000110976	2133.77	3138.72	11.542	16.978
OSTF1	481.565	0.594081	0.13007	4.56738	4.94e-06	0.000112016	570.927	369.458	21.5285	13.9315
PADI3	62.0807	-1.27881	0.280011	-4.567	4.95e-06	0.000112038	20.6549	95.8337	0.320776	1.48832
PTPRE	813.452	-0.733226	0.16058	-4.5661	4.97e-06	0.000112223	540.146	942.002	4.85264	8.4629
TMX2	1687.52	0.66995	0.146726	4.56598	4.97e-06	0.000112223	2138.89	1297.93	59.0945	35.8599
FAM101B	1053.01	0.823694	0.180622	4.56033	5.11e-06	0.000115099	1529.12	804.99	20.9137	11.0098
STEAP1	454.689	0.832196	0.182566	4.55832	5.16e-06	0.000116019	605.53	315.757	22.8333	11.9065
TMEM80	204.257	-0.870659	0.191041	-4.55743	5.18e-06	0.000116323	134.847	268.795	2.98451	5.94911
SYNM	350.283	-0.98381	0.215893	-4.55694	5.19e-06	0.000116401	232.477	527.634	1.56493	3.55179
ARPC2	9071.24	0.408865	0.0897298	4.55662	5.2e-06	0.000116401	10478.4	7835.32	330.228	246.932
KDM4A	1062.92	-0.458202	0.10058	-4.5556	5.22e-06	0.000116716	865.178	1200.63	9.49998	13.1833
DISP1	283.116	-0.807706	0.177308	-4.55538	5.23e-06	0.000116716	207.542	387.801	2.08682	3.89931
WDR77	1091.49	0.677203	0.148684	4.55463	5.25e-06	0.000116948	1399.08	843.434	28.7662	17.3417
GAS2L3	1424.32	0.96004	0.210841	4.55338	5.28e-06	0.000117455	1915.74	865.338	14.8877	6.72475
SEMA3F	1356.67	-0.911064	0.200157	-4.55174	5.32e-06	0.000118189	898.904	1876.48	12.6579	26.4237
PUM1	1825.25	-0.566296	0.124423	-4.55136	5.33e-06	0.000118213	1514.12	2287.34	13.921	21.0301
PTPRR	112.286	0.939375	0.20669	4.54484	5.5e-06	0.0001215	149.32	68.9291	1.64909	0.761257
SPIRE1	1238.42	0.543898	0.11968	4.54459	5.5e-06	0.0001215	1474.95	993.685	13.2149	8.90298
B4GALT5	3272.2	-0.776025	0.17077	-4.54426	5.51e-06	0.0001215	2192.43	3982.58	22.9634	41.7135
C1QTNF6	133.514	-0.897409	0.197465	-4.54464	5.5e-06	0.0001215	90.2009	185.93	1.52108	3.13538
SEC14L1	2472.66	-0.528065	0.11626	-4.54211	5.57e-06	0.000122361	2091.05	3064.5	16.5779	24.2954
LINC01521	135.491	-0.815694	0.179577	-4.54231	5.56e-06	0.000122361	92.0977	174.151	1.03703	1.96095
ARHGAP11B	214.176	1.11903	0.246408	4.54135	5.59e-06	0.00012261	322.615	115.101	3.92839	1.40155
DBF4B	763.783	0.950144	0.209253	4.54065	5.61e-06	0.000122823	1060.56	484.682	10.1762	4.65055
SCN3A	140.355	-0.826744	0.182116	-4.53964	5.64e-06	0.000123222	101.682	194.272	0.546198	1.04356
FAM58A	346.793	0.640219	0.141044	4.53913	5.65e-06	0.000123327	442.746	275.186	16.9795	10.5535
TBC1D1	1998.36	0.507546	0.111846	4.53791	5.68e-06	0.000123853	2448.77	1698.09	17.5812	12.1916
EIF2S2	3589.88	0.535268	0.11805	4.53425	5.78e-06	0.000125824	4292.81	2911.98	81.9982	55.6226
TMEM208	868.056	0.590867	0.13041	4.53085	5.87e-06	0.000127467	1023.93	663.883	63.8481	41.397
SHB	908.653	-0.562403	0.12412	-4.53113	5.87e-06	0.000127467	748.668	1128.69	6.15628	9.28121
ABLIM3	2340.23	-0.482145	0.1065	-4.52718	5.98e-06	0.000129499	1955.9	2766.73	20.2674	28.6694
ZSWIM4	351.129	-0.659001	0.145604	-4.52597	6.01e-06	0.00013004	282.741	461.905	3.22624	5.2706
SMARCC2	2350.87	-0.654092	0.14456	-4.52473	6.05e-06	0.00013026	1943.09	3159.22	16.9343	27.5329
MAX	1013.55	-0.593667	0.131212	-4.52448	6.05e-06	0.00013026	763.148	1179.74	12.4412	19.2327
PGPEP1	1060.01	-0.805086	0.177933	-4.52465	6.05e-06	0.00013026	660.67	1236.11	4.61031	8.62582
ZC3H3	528.422	0.655448	0.144872	4.52431	6.06e-06	0.00013026	666.34	409.043	6.77848	4.16107
PSRC1	1147.6	1.0078	0.22281	4.52312	6.09e-06	0.000130591	1594.67	675.211	44.5057	18.8444
GSE1	536.074	-0.582651	0.128813	-4.52323	6.09e-06	0.000130591	413.405	633.278	2.69812	4.13313
ACSF2	405.379	-0.776784	0.171813	-4.52111	6.15e-06	0.000131642	278.693	507.441	5.69235	10.3646
CYCS	4069.94	0.754982	0.167165	4.51638	6.29e-06	0.000134405	5337.18	2996.08	47.7152	26.7854
RCAN1	474.294	0.600992	0.13313	4.51432	6.35e-06	0.000135516	575.744	370.294	7.92697	5.09828
NUS1	1756.47	0.66682	0.147794	4.51183	6.43e-06	0.000136908	2196.02	1335.23	22.6182	13.7524
IRF2BP2	1861.36	-0.650327	0.144216	-4.50939	6.5e-06	0.000138277	1438.47	2332.72	15.2733	24.7682
CELSR2	1171.17	-0.873658	0.193836	-4.5072	6.57e-06	0.000139504	844.834	1695	3.96852	7.96207
IL17RD	1018.07	-0.699463	0.155243	-4.50561	6.62e-06	0.000140338	782.347	1324.54	4.44202	7.52051
C1orf174	541.017	0.727423	0.161464	4.50516	6.63e-06	0.000140421	679.991	391.312	20.2081	11.6291
SIX4	874.953	-0.727562	0.161516	-4.50458	6.65e-06	0.000140596	648.507	1126.79	5.1168	8.8905
KCNQ5	491.794	1.01701	0.225843	4.50317	6.69e-06	0.000141316	763.21	319.539	5.69165	2.38297
ST3GAL5	263.409	-0.959612	0.213235	-4.50025	6.79e-06	0.000143053	142.357	318.43	2.87916	6.44021
LARP1B	418.613	0.66065	0.146815	4.49987	6.8e-06	0.000143093	546.309	334.128	4.66024	2.85025
DDX10	641.481	0.70249	0.156263	4.49556	6.94e-06	0.000145806	823.293	484.931	12.4883	7.35575
TUBA1B	43135.6	-0.899677	0.200251	-4.49275	7.03e-06	0.000147526	23495.4	48743	664.344	1378.24
PLD1	537.425	-0.705372	0.157286	-4.48464	7.3e-06	0.000152816	392.985	669.371	3.22936	5.50056
EDNRA	157.298	-1.10141	0.245598	-4.4846	7.31e-06	0.000152816	74.1639	206.372	0.884794	2.46206
NPTXR	339.957	-0.972146	0.216853	-4.48297	7.36e-06	0.000153762	214.985	484.971	1.83044	4.12918
MYRF	260.147	-0.863137	0.192598	-4.48155	7.41e-06	0.000154558	193.584	385.075	1.59847	3.17966
NOVA1	244.432	-0.750745	0.167622	-4.4788	7.51e-06	0.000156288	174.41	309.156	2.01238	3.56711
ATP6V0C	3581.16	0.569437	0.127148	4.47854	7.52e-06	0.000156288	4240.81	2796.19	170.564	112.462
EFNB3	198.898	-0.92171	0.205889	-4.47674	7.58e-06	0.000157372	124.046	264.535	1.90792	4.06874
PRICKLE2	352.136	-0.808528	0.180641	-4.47588	7.61e-06	0.000157777	223.19	420.499	1.32784	2.5017
ZUFSP	276.228	0.613962	0.13719	4.47527	7.63e-06	0.000157991	337.149	214.284	7.54972	4.79843
RGS20	696.957	0.619804	0.138626	4.47105	7.78e-06	0.000160901	831.814	526.156	15.0086	9.49353
USP36	985.493	0.754535	0.168782	4.47046	7.81e-06	0.00016111	1351.48	758.029	12.7842	7.1705
NRIP3	1429.97	0.566524	0.126799	4.46788	7.9e-06	0.000162829	1824.42	1205.98	23.7144	15.6757
NHS	411.46	-0.704869	0.157841	-4.4657	7.98e-06	0.00016425	309.032	526.519	1.67565	2.85491
CCDC59	527.639	0.596036	0.133491	4.465	8.01e-06	0.000164547	633.379	408.803	17.981	11.6055
KIFAP3	445.542	-0.780136	0.174757	-4.46411	8.04e-06	0.000164987	321.419	587.162	3.47991	6.35703
MRTO4	1486.92	0.700289	0.156892	4.4635	8.06e-06	0.000165029	2036.96	1201.14	44.3691	26.1633
TRIB1	661.601	-1.10387	0.247313	-4.46343	8.07e-06	0.000165029	340.19	946.156	4.49026	12.4886
SMG5	2566.56	0.535294	0.119991	4.46112	8.15e-06	0.000166392	3161.53	2142.94	34.3039	23.2518
CBX1	5010.91	0.605502	0.135731	4.46104	8.16e-06	0.000166392	6351.11	4064.98	117.506	75.209
HSPA5	18483.6	0.771311	0.172962	4.45943	8.22e-06	0.000167409	25914.1	14301.8	323.18	178.36
ZCCHC24	1828	-0.695002	0.155903	-4.45792	8.28e-06	0.000168343	1323.42	2235.29	13.288	22.4438
HMG20A	799.733	-0.752922	0.168986	-4.45552	8.37e-06	0.000169992	569.595	1015	6.82006	12.1532
TRIB2	582.025	-1.03553	0.23255	-4.45294	8.47e-06	0.000171797	306.007	761.977	3.43862	8.56238
KRT10	496.346	0.525671	0.11807	4.45222	8.5e-06	0.000172127	614.313	419.917	14.2126	9.71509
MAP9	871.808	-0.651489	0.146344	-4.45178	8.52e-06	0.000172231	654.071	1063.36	4.41732	7.18147
PCIF1	587.938	-0.745479	0.167542	-4.44952	8.61e-06	0.000173803	427.777	756.36	7.85296	13.885
PUS1	401.039	0.923231	0.207544	4.44836	8.65e-06	0.000174492	594.467	278.964	14.1366	6.63385
FAM63A	411.608	-0.715147	0.160949	-4.44332	8.86e-06	0.000178377	294.702	507.255	4.70824	8.10406
TMEM51	341.563	0.726244	0.163504	4.44176	8.92e-06	0.000178693	438.252	252.425	9.69531	5.58432
PNRC2	2242.85	0.586264	0.131991	4.4417	8.93e-06	0.000178693	2621.1	1704.29	53.7581	34.9546
MAGOH	686.231	0.603001	0.135753	4.44188	8.92e-06	0.000178693	850.266	545.071	55.684	35.6968
XPO6	3225.38	0.647725	0.145809	4.4423	8.9e-06	0.000178693	4235.27	2614.41	45.3286	27.9811
PLEKHA2	2084.44	-0.692216	0.155972	-4.43809	9.08e-06	0.000181456	1605	2704.17	14.0894	23.7385
CCNJ	493.555	0.786502	0.177279	4.43653	9.14e-06	0.000182513	636.371	345.602	7.61407	4.13507
VASH1	217.997	-0.815975	0.184076	-4.43283	9.3e-06	0.000185179	154.324	292.648	1.26711	2.40285
EXOG	248.234	-0.720247	0.162492	-4.4325	9.31e-06	0.000185179	192.931	333.218	3.03628	5.24405
CCNH	992.787	0.544042	0.12274	4.43249	9.32e-06	0.000185179	1199.07	806.965	36.2432	24.3915
CYP1B1	2756.72	-0.900094	0.203111	-4.43153	9.36e-06	0.000185741	1444.64	3014.12	13.8776	28.9543
FLJ37453	54.3232	-1.03926	0.234555	-4.43076	9.39e-06	0.000186139	32.8089	82.4618	0.594577	1.49441
PROX1	30.3581	-1.2226	0.27599	-4.42987	9.43e-06	0.000186381	10.4237	43.2137	0.0591772	0.245331
GALM	164.28	-0.813024	0.183521	-4.43015	9.42e-06	0.000186381	115.643	218.363	2.3059	4.3541
FAR1	2143.71	0.619531	0.139904	4.42827	9.5e-06	0.00018732	2646.75	1673.38	24.842	15.7062
MED29	1114.86	-0.727114	0.164213	-4.42788	9.52e-06	0.00018732	844.369	1468.15	11.72	20.3782
SENP6	1664.52	0.506521	0.114387	4.42814	9.5e-06	0.00018732	1901.49	1318.62	11.7886	8.17502
XPOT	3850.36	0.555539	0.125493	4.42685	9.56e-06	0.000187687	4665.96	3110.85	58.5291	39.022
IMP4	924.425	0.580259	0.13107	4.42711	9.55e-06	0.000187687	1166.75	762.145	55.0681	35.9716
GTF2A2	1252.87	0.554619	0.125429	4.42177	9.79e-06	0.000191884	1452.54	969.015	45.4588	30.3264
TTC7B	483.893	0.660601	0.149458	4.41997	9.87e-06	0.000193221	622.638	379.86	8.97703	5.47672
RIN1	1140.33	-0.734372	0.166265	-4.41688	1e-05	0.000195728	813.915	1426.28	15.0139	26.3099
TRIM62	312.554	-0.721412	0.163455	-4.41352	1.02e-05	0.000198239	228.173	395.215	2.94115	5.09432
BMS1P6	51.4977	1.03481	0.234455	4.41368	1.02e-05	0.000198239	73.622	29.4786	0.77604	0.31073
RABGGTB	1502.57	0.501986	0.113765	4.41248	1.02e-05	0.000198858	1848.75	1286.54	53.5592	37.2717
DYRK1B	483.368	-0.900831	0.204166	-4.41224	1.02e-05	0.000198858	297.414	620.895	5.72963	11.9614
SNHG7	970.991	0.553889	0.125556	4.4115	1.03e-05	0.000199265	1210.4	807.547	22.3945	14.941
FOXJ2	718.042	-0.724966	0.164457	-4.40824	1.04e-05	0.000202004	576.832	1000.99	5.20964	9.04045
TPX2	7664.85	0.924687	0.209843	4.40656	1.05e-05	0.000203016	10388.1	4842.52	140.448	65.4712
SCRIB	2233.86	0.635387	0.144184	4.40677	1.05e-05	0.000203016	2797.3	1743.77	13.271	8.27281
NMNAT2	711.152	-0.695141	0.157813	-4.40485	1.06e-05	0.00020434	538.085	910.162	4.62114	7.81658
CLINT1	2342.32	0.478761	0.108703	4.40429	1.06e-05	0.000204583	2731.27	1935.16	33.4719	23.7155
IGF2BP3	3514.95	-0.711956	0.161693	-4.40314	1.07e-05	0.000205389	2537.33	4358.22	30.2055	51.8821
REXO1	894.446	0.748591	0.170028	4.40274	1.07e-05	0.000205486	1199.56	675.069	12.9646	7.29601
CCNT1	723.957	-0.669402	0.152053	-4.40243	1.07e-05	0.000205502	579.846	957.351	4.05544	6.69571
DRAP1	5385.33	0.472474	0.107363	4.40072	1.08e-05	0.000206846	6173.6	4394.91	304.138	216.512
PDP1	2259.39	-0.750274	0.170642	-4.39677	1.1e-05	0.00021035	1494.94	2662.01	16.6252	29.6041
LINC01089	121.963	-1.05936	0.240981	-4.39603	1.1e-05	0.000210494	72.8086	188.997	2.37001	6.15208
NFAT5	1265.87	-0.854633	0.194397	-4.39633	1.1e-05	0.000210494	860.06	1702.66	3.11454	6.16587
ZNF548	156.702	-0.837569	0.19068	-4.39254	1.12e-05	0.000213616	107.217	208.479	1.16667	2.26855
ARRB1	80.7884	-1.00842	0.22963	-4.39152	1.13e-05	0.00021433	44.6473	108.195	0.293873	0.712152
IFITM10	1630.02	-1.05377	0.240043	-4.38994	1.13e-05	0.00021537	812.45	2106.71	5.97783	15.5007
LRP4	229.366	-0.633709	0.144357	-4.38987	1.13e-05	0.00021537	189.032	302.474	1.13761	1.82031
DUSP6	963.906	-1.09341	0.249115	-4.38918	1.14e-05	0.000215764	533.405	1473.1	7.77883	21.4828
KIAA1671	1668.43	-0.661025	0.150747	-4.38498	1.16e-05	0.00021967	1265.28	2075.6	5.96956	9.79265
DPM3	164.762	-0.814785	0.18585	-4.3841	1.16e-05	0.000220028	115.841	219.826	10.4851	19.8971
ESRRG	22.4097	-1.25327	0.28587	-4.38404	1.16e-05	0.000220028	6.59967	38.4741	0.0443055	0.258288
TRPV2	94.5789	-1.05066	0.239679	-4.38363	1.17e-05	0.000220149	51.3708	132.719	0.905767	2.3401
AKIRIN2	1057.27	0.602542	0.137519	4.38153	1.18e-05	0.000221976	1225.24	785.004	31.3987	20.1169
2025-09-06	405.982	-0.64387	0.147044	-4.37877	1.19e-05	0.000224509	310.141	501.16	2.6873	4.34243
RAF1	2655.21	0.426977	0.0975463	4.37718	1.2e-05	0.000225849	3069.45	2262.7	46.4031	34.2068
CDKN3	1509.68	0.783941	0.179118	4.37668	1.21e-05	0.000226064	1908.88	1036.59	106.072	57.6006
RTN4	19223.4	0.482312	0.110245	4.37491	1.21e-05	0.000227598	22785.9	16094.1	216.867	153.177
CNST	590.286	0.489463	0.111917	4.37346	1.22e-05	0.0002282	675.204	474.043	6.00821	4.21821
ZNF776	265.187	-0.872705	0.199527	-4.37386	1.22e-05	0.0002282	180.145	364.244	1.68539	3.40776
TRPS1	405.058	-0.719703	0.164558	-4.37355	1.22e-05	0.0002282	282.382	489.646	1.37661	2.38703
CACNG8	371.123	-0.760936	0.174027	-4.37253	1.23e-05	0.000228866	261.853	471.568	1.48148	2.66799
ZNF146	1979.5	0.564313	0.129071	4.37211	1.23e-05	0.000229007	2389.33	1580.77	30.6786	20.2969
PMAIP1	888.34	0.875508	0.200386	4.36911	1.25e-05	0.000231867	1170.87	576.647	29.9434	14.7469
XYLT2	1271.79	-0.523246	0.119787	-4.36813	1.25e-05	0.000232595	1081.42	1581.05	14.8686	21.7381
AFF3	813.111	-0.539556	0.123535	-4.36765	1.26e-05	0.000232803	663.792	983.394	4.00203	5.92893
GPR173	141.371	-0.969805	0.222066	-4.36719	1.26e-05	0.000232978	86.4078	197.225	1.00637	2.29704
WDFY1	3283.11	0.478354	0.109543	4.36681	1.26e-05	0.000233077	3867.05	2739.66	41.0505	29.0828
ALG5	658.101	0.611636	0.140132	4.36471	1.27e-05	0.000234747	811.071	515.78	33.1051	21.0524
SERP1	2399.81	0.519947	0.119126	4.36467	1.27e-05	0.000234747	2914.62	1998.68	45.4931	31.1966
LPCAT4	472.903	-0.741222	0.169876	-4.36331	1.28e-05	0.000235908	371.721	656.286	9.64577	17.0299
DAZAP1	3281.79	0.639302	0.146622	4.36021	1.3e-05	0.000238964	4175.83	2592.82	90.1646	55.9842
EXOSC3	455.807	0.788468	0.180985	4.35655	1.32e-05	0.000242674	615.362	332.559	16.5491	8.94359
CDV3	4814.3	0.587161	0.134797	4.3559	1.33e-05	0.000243074	5901.56	3829.95	64.6436	41.9519
MAF	188.646	-1.11668	0.256384	-4.35551	1.33e-05	0.000243182	64.6316	196.221	0.465243	1.41248
VPS37A	900.711	0.484628	0.111302	4.35416	1.34e-05	0.00024437	1037.32	731.492	11.2014	7.89892
ADK	1827.41	0.485578	0.111572	4.35216	1.35e-05	0.000246284	2175.77	1533.1	44.167	31.1212
PTPN13	995.199	-0.642501	0.147663	-4.35112	1.35e-05	0.000247138	769.62	1243.17	4.44261	7.17618
LIX1L	1106	-0.716978	0.164807	-4.35041	1.36e-05	0.000247614	852.766	1471.93	10.5764	18.2555
NAV1	4832.95	-0.6092	0.14007	-4.34925	1.37e-05	0.000248605	4024.13	6316.68	15.0197	23.5765
CD58	714.209	-0.701292	0.161302	-4.34769	1.38e-05	0.000250053	506.349	862.926	14.5838	24.8539
ARHGEF10L	602.308	-0.657761	0.151386	-4.34494	1.39e-05	0.000252884	464.437	759.895	5.11671	8.37178
PTS	492.389	0.678072	0.156095	4.34396	1.4e-05	0.000253268	617.067	370.034	32.7101	19.6152
CENPT	769.625	0.762822	0.175596	4.34418	1.4e-05	0.000253268	1071.65	593.827	22.626	12.5376
BICD2	1724.19	0.568744	0.130934	4.34375	1.4e-05	0.000253268	2191.85	1444.16	16.9139	11.1442
GRK6	918.155	0.615637	0.141753	4.34303	1.41e-05	0.000253772	1181.89	748.539	19.1166	12.1073
MAD2L1	2320.38	0.810009	0.186529	4.34254	1.41e-05	0.000253997	3037.83	1604.28	104.739	55.3125
LOC730101	666.768	-0.830766	0.191321	-4.34227	1.41e-05	0.000253997	453.08	877.181	5.92818	11.4772
JUP	2884.8	-0.854694	0.196873	-4.34135	1.42e-05	0.000254737	1931.06	3836.39	27.2543	54.1453
MAP2K3	1238.83	0.631233	0.145437	4.34024	1.42e-05	0.00025537	1602.88	1001.68	33.4285	20.8903
PSMD8	3710.78	0.415082	0.095631	4.34045	1.42e-05	0.00025537	4304.34	3200.63	138.473	102.966
TRIM32	667.301	-0.751035	0.173185	-4.3366	1.45e-05	0.000259301	471.091	840.518	6.27157	11.1897
FZD2	1807.38	-0.673057	0.155245	-4.33544	1.45e-05	0.000260333	1434.92	2380.6	18.6026	30.8628
SLC52A2	1365.87	0.534745	0.123397	4.33352	1.47e-05	0.000262282	1680.1	1137.56	37.335	25.2788
KCMF1	1330.72	0.422037	0.0974741	4.32974	1.49e-05	0.000266487	1533.56	1134.47	10.0526	7.43655
DERL1	1893.25	0.485018	0.112033	4.32923	1.5e-05	0.000266764	2226.04	1568.81	32.9977	23.2552
NXPH2	25.9105	-1.2112	0.279916	-4.32702	1.51e-05	0.000269109	14.1311	53.0708	0.273296	1.02639
KLC2	1618.66	0.696737	0.161194	4.32234	1.54e-05	0.000274367	2081.12	1226.45	31.5196	18.5751
RIOK1	358.992	0.535487	0.123892	4.32219	1.54e-05	0.000274367	445.349	301.472	8.55292	5.78977
PIP5K1A	2740.73	0.485065	0.112304	4.31921	1.57e-05	0.000277754	3230.71	2276.59	42.0157	29.6074
AK5	1357.28	-0.577182	0.133681	-4.3176	1.58e-05	0.000279275	1013.24	1549.03	11.5723	17.6916
UBXN7	635.41	-0.671761	0.155592	-4.31744	1.58e-05	0.000279275	494.829	820.718	5.17735	8.5871
LIAS	215.22	0.74141	0.171763	4.31647	1.59e-05	0.000280149	262.631	148.511	6.64095	3.75528
AURKAIP1	1701.47	0.450038	0.104337	4.3133	1.61e-05	0.00028384	1992.67	1442.65	86.0142	62.2723
CASP8AP2	441.428	-0.694081	0.160938	-4.31272	1.61e-05	0.000284228	362.046	612.152	2.65046	4.48144
ATAD3A	1133.61	0.750456	0.174022	4.31242	1.61e-05	0.000284266	1555.43	871.282	27.435	15.3679
BEND7	316.151	0.687574	0.159563	4.30912	1.64e-05	0.000288179	380.592	225.939	6.09027	3.6155
LOC100288637	669.144	0.966518	0.224415	4.30684	1.66e-05	0.000290795	965.628	422.669	2.07945	0.910207
BCL9L	3398.89	-0.553499	0.128597	-4.30415	1.68e-05	0.000293975	2712.54	4067.08	17.3536	26.0193
C2orf68	260.635	-0.899593	0.209052	-4.3032	1.68e-05	0.00029487	169.315	355.076	1.9655	4.12192
RAB32	1178.21	0.739136	0.171845	4.30119	1.7e-05	0.000297189	1542.9	873.314	63.4994	35.942
PAK4	2194.32	0.837067	0.194719	4.29884	1.72e-05	0.000299612	2898.32	1483.59	46.8333	23.973
TOMM34	3800	0.538523	0.125271	4.29884	1.72e-05	0.000299612	4722.58	3187.87	114.113	77.0294
SLC25A38	844.684	0.484423	0.112735	4.29701	1.73e-05	0.000301722	942.652	664.502	21.9733	15.4896
PPP1R14B	3493.64	0.4692	0.109211	4.29627	1.74e-05	0.00030235	4043.95	2884.07	202.855	144.672
KIAA2018	247.429	-0.870845	0.202715	-4.29592	1.74e-05	0.000302449	167.482	339.456	0.604956	1.22614
PHF13	551.336	-0.699466	0.162852	-4.29509	1.75e-05	0.000302831	418.261	712.117	5.64259	9.60689
ZSCAN2	150.85	-0.853428	0.198693	-4.2952	1.75e-05	0.000302831	92.9314	185.826	1.04428	2.08814
SETD5	1461.54	-0.629515	0.146577	-4.29477	1.75e-05	0.000302886	1186.85	1897.05	8.26461	13.2101
C10orf2	681.135	0.680006	0.158376	4.29362	1.76e-05	0.000304052	888.74	531.503	12.006	7.18007
SMARCA1	2262.7	-0.501342	0.116771	-4.29337	1.76e-05	0.000304052	1924.73	2767.71	23.1973	33.357
AIDA	1930.84	0.495514	0.115464	4.2915	1.77e-05	0.000304866	2235.48	1562.26	36.8196	25.7313
HIF1AN	1835.52	-0.724347	0.168766	-4.29203	1.77e-05	0.000304866	1388.75	2418.7	9.9476	17.3251
SAP30BP	1411.39	0.497276	0.115848	4.29249	1.77e-05	0.000304866	1672.57	1166.78	29.2925	20.4343
RASSF1	604.192	0.773468	0.180222	4.29174	1.77e-05	0.000304866	790.504	432.307	16.6972	9.13129
QTRTD1	671.875	0.727691	0.169569	4.29141	1.78e-05	0.000304866	873.822	500.078	10.7513	6.15286
C11orf68	1421.21	-0.610217	0.142307	-4.28804	1.8e-05	0.000309151	1111.1	1746.89	35.3087	55.5131
SLC35E2	208.415	-0.82814	0.193222	-4.28595	1.82e-05	0.000311066	136.204	263.803	0.924149	1.78992
PRSS23	22059	-0.672283	0.156855	-4.28601	1.82e-05	0.000311066	16251.9	26996.1	70.391	116.927
EME1	312.171	0.868944	0.202747	4.28585	1.82e-05	0.000311066	430.137	212.364	9.04686	4.46654
FZD1	1392.77	-0.95561	0.223053	-4.28423	1.83e-05	0.00031296	807.811	1827.66	9.19429	20.8019
UBASH3B	3167.92	0.66166	0.154509	4.28235	1.85e-05	0.000315236	4156.53	2526.72	29.812	18.1224
MICALL1	1898.34	0.689231	0.161043	4.2798	1.87e-05	0.000318488	2488.91	1475.45	27.4143	16.2514
EED	308.467	-0.702326	0.164201	-4.27722	1.89e-05	0.000321801	257.963	439.019	5.04419	8.58454
FAM160B1	1245.83	-0.637062	0.148977	-4.27624	1.9e-05	0.000322835	1010.95	1626.51	8.14398	13.1027
KDR	53.5839	-0.972943	0.227751	-4.27197	1.94e-05	0.00032868	31.3104	73.349	0.256019	0.59976
DTX3	508.703	-0.810157	0.189665	-4.27151	1.94e-05	0.000328954	343.019	652.256	7.6089	14.4684
KIAA0319L	1951.85	-0.50687	0.118719	-4.26948	1.96e-05	0.000331559	1598.76	2309.57	16.4496	23.7631
NECAP2	1685.4	0.404666	0.0947943	4.26888	1.96e-05	0.000332053	1836.4	1376.32	43.6911	32.745
PLAGL1	516.084	0.619707	0.145197	4.26803	1.97e-05	0.000332916	671.519	423.543	8.04629	5.07498
TMEM135	473.675	-0.521877	0.122344	-4.26564	1.99e-05	0.000336106	363.358	531.099	1.98128	2.89593
PIANP	174.456	-1.00829	0.236416	-4.26487	2e-05	0.000336855	106.423	260.307	1.7361	4.24643
ILK	4560.1	0.465659	0.109193	4.26454	2e-05	0.00033695	5451.89	3898.33	123.479	88.2928
ZBTB6	300.585	-0.632118	0.148288	-4.26279	2.02e-05	0.000339196	220.74	354.264	2.66299	4.27383
MAST3	141.616	-0.851305	0.199777	-4.26128	2.03e-05	0.000341083	101.975	202.332	0.856748	1.69991
EFR3A	1827.29	-0.557036	0.130857	-4.25682	2.07e-05	0.000347542	1448.69	2179.48	13.2482	19.9312
RPS6KA5	40.7507	-1.02186	0.240076	-4.25641	2.08e-05	0.000347766	22.087	56.2994	0.253721	0.646731
ZC3H7A	1777.99	0.532491	0.125154	4.25468	2.09e-05	0.000350037	2069.02	1402.82	26.8444	18.2009
RHEB	3497.73	0.694115	0.163206	4.25299	2.11e-05	0.000352279	4258.05	2510.65	101.599	59.9054
PCDHB2	72.7482	-0.938822	0.220797	-4.25197	2.12e-05	0.000353465	46.0189	101.623	0.821052	1.81312
SFSWAP	1022.28	0.652655	0.153513	4.25146	2.12e-05	0.000353842	1272.56	779.081	18.5037	11.3283
ARL4C	8170.48	-0.738998	0.173874	-4.25019	2.14e-05	0.000355434	5414.53	9586.75	66.8019	118.277
PCYOX1	3171.68	-0.500875	0.117907	-4.24805	2.16e-05	0.000358417	2501.05	3597.53	23.0292	33.1254
CUL1	2338.92	0.523439	0.123256	4.24676	2.17e-05	0.000360061	2796.3	1909.95	43.1431	29.468
P2RY1	84.5659	-0.977412	0.230198	-4.24596	2.18e-05	0.000360916	51.1885	120.437	0.815435	1.91857
CCNB1	4509.41	0.937905	0.220932	4.24522	2.18e-05	0.000361679	5991.72	2702.73	136.896	61.7506
ZNF516	234.139	-0.740196	0.174408	-4.24404	2.2e-05	0.000363159	168.669	299.175	0.968104	1.71717
CCSAP	480.222	0.685849	0.161716	4.24108	2.22e-05	0.000367556	586.104	348.318	5.66654	3.36758
TPMT	837.509	0.546318	0.128858	4.2397	2.24e-05	0.000369379	1007.84	675.968	15.2642	10.2378
DCBLD2	34190.8	-0.494791	0.116755	-4.23784	2.26e-05	0.000372012	28546.7	40854.7	231.965	331.977
COX18	389.494	-0.515524	0.121664	-4.23729	2.26e-05	0.000372242	311.966	454.05	3.40436	4.95487
CENPK	530.869	0.832997	0.196593	4.23717	2.26e-05	0.000372242	742.414	380.816	21.2347	10.8922
TSC22D1	6570.4	-0.974969	0.230248	-4.23443	2.29e-05	0.000376369	3554.43	8332.09	25.956	60.8446
ASNS	627.183	0.799528	0.189026	4.22971	2.34e-05	0.000383903	832.744	442.326	16.3221	8.66974
ZNF490	69.6575	-0.952938	0.225328	-4.22911	2.35e-05	0.000384487	41.1933	93.8727	0.334454	0.762166
AOX1	1322.04	0.531995	0.125875	4.22639	2.37e-05	0.000388253	1606.79	1089.65	16.1267	10.9364
SDHA	2882.17	-0.652107	0.154292	-4.22646	2.37e-05	0.000388253	2294.63	3746.53	40.7199	66.4848
NDUFAF2	457.995	0.625639	0.148082	4.22496	2.39e-05	0.000390272	578.731	362.957	39.8516	24.9933
SNX30	997.473	-0.684767	0.16212	-4.22383	2.4e-05	0.00039177	758.105	1274.68	4.93481	8.29742
TMED2	7412.21	0.581512	0.13774	4.22181	2.42e-05	0.000394002	8734.75	5685.04	203.416	132.394
INTS6-AS1	13.9645	-1.20862	0.286294	-4.22159	2.43e-05	0.000394002	3.40041	23.0121	0.213921	1.4477
MBOAT2	940.636	0.562942	0.133357	4.2213	2.43e-05	0.000394002	1141.54	754.778	14.8576	9.82372
TLR4	1107.08	-0.624986	0.148057	-4.22124	2.43e-05	0.000394002	831.896	1327.72	7.12465	11.371
KDM6A	415.813	-0.630851	0.149412	-4.22222	2.42e-05	0.000394002	318.212	509.64	2.65233	4.2479
SGOL2	1623.68	0.93695	0.221976	4.22096	2.43e-05	0.000394045	2204.03	993.343	23.3367	10.5177
ANP32B	4682.26	0.496658	0.117721	4.21896	2.45e-05	0.000397085	5652.76	3943.18	173.187	120.81
PPP1R3E	151.424	-0.844785	0.200257	-4.21851	2.46e-05	0.000397431	110.25	216.924	1.21436	2.38933
VAMP2	664.699	-0.765188	0.181485	-4.21626	2.48e-05	0.000400935	470.045	854.99	10.7992	19.6431
ARF3	5129.53	-0.623492	0.147919	-4.2151	2.5e-05	0.000401807	4199.92	6688.36	58.79	93.6228
CEP83	248.524	0.657415	0.155953	4.21548	2.49e-05	0.000401807	331.155	201.968	5.08392	3.10063
LOC283788	561.309	-0.636282	0.150957	-4.215	2.5e-05	0.000401807	419.768	676.46	5.6753	9.14579
RBM12	2385.79	0.613176	0.145537	4.2132	2.52e-05	0.00040455	2978.19	1886.5	22.0011	13.9364
PIK3R2	1897.89	-0.645535	0.153238	-4.21264	2.52e-05	0.000405096	1552.13	2519.3	19.1399	31.0665
ARHGAP17	1322	0.566795	0.134588	4.21133	2.54e-05	0.00040698	1588.15	1046.22	22.4081	14.7617
TMEM165	2683.23	0.60169	0.142886	4.21098	2.54e-05	0.000407148	3220.49	2060.37	76.7316	49.0905
SPAG5	3553.17	0.92285	0.219195	4.21018	2.55e-05	0.000408113	4950.53	2272.85	64.3654	29.5509
PFDN2	1371.08	0.479549	0.113948	4.20848	2.57e-05	0.000410728	1656.61	1171.05	127.757	90.3106
NUP50	2347.21	0.731262	0.173803	4.20742	2.58e-05	0.000412194	3090.73	1757.39	27.8174	15.817
TCF7L2	861.352	-0.490134	0.116503	-4.20705	2.59e-05	0.000412398	708.68	1011.36	8.11076	11.5748
POC1B	521.819	0.562856	0.133816	4.2062	2.6e-05	0.000413474	630.717	417.281	8.62151	5.70397
PSMD7	2838.55	0.417886	0.0993729	4.20523	2.61e-05	0.000414669	3326.27	2466.78	98.6141	73.1328
SRSF7	2990.47	0.651336	0.154894	4.20504	2.61e-05	0.000414669	3911.56	2395.7	77.8076	47.6547
TBX2	66.5869	0.991434	0.235876	4.2032	2.63e-05	0.000417572	102.887	42.8676	1.50709	0.627928
PLCB4	494.565	-0.55093	0.131083	-4.20292	2.63e-05	0.000417624	396.434	594.217	3.46901	5.19971
VPS26B	954.163	-0.529179	0.125973	-4.20073	2.66e-05	0.000421203	797.104	1172.2	10.5776	15.5552
CHD2	2072.63	-0.545214	0.129844	-4.19899	2.68e-05	0.000423966	1675.41	2498.76	8.71239	12.9939
KRT34	28.9059	1.19941	0.285744	4.19751	2.7e-05	0.000426266	58.3206	12.801	0.561876	0.123328
NAPRT	104.076	1.12429	0.268036	4.19457	2.73e-05	0.000431358	164.177	51.4511	2.38652	0.747907
SOX4	1402.01	-0.995227	0.237489	-4.19062	2.78e-05	0.00043844	715.925	1747.61	7.26646	17.7378
C15orf57	190.711	-0.802949	0.191704	-4.18849	2.81e-05	0.000441583	129.77	246.1	2.22935	4.2278
CPED1	582.125	0.887384	0.211855	4.18863	2.81e-05	0.000441583	880.23	422.87	7.77254	3.734
CBX4	250.034	-0.779694	0.186225	-4.18683	2.83e-05	0.000444318	183.844	339.368	3.43609	6.34287
GNPNAT1	1878.26	0.625114	0.149324	4.1863	2.84e-05	0.000444864	2468.86	1547.3	31.1187	19.503
ST8SIA1	112.417	-1.01764	0.243103	-4.18603	2.84e-05	0.000444882	60.9663	154.485	0.310734	0.787382
FGFBP3	67.0343	-0.945721	0.225958	-4.18538	2.85e-05	0.000445659	43.8853	98.3571	0.847419	1.89926
AMH	28.4086	1.19156	0.284731	4.18487	2.85e-05	0.00044617	46.2366	9.61805	1.13439	0.235973
MUS81	803.999	0.547941	0.130983	4.18331	2.87e-05	0.000448738	1005.38	672.441	20.7404	13.872
FOXO1	70.9679	-1.09203	0.261328	-4.17876	2.93e-05	0.00045729	30.0882	91.0879	0.259617	0.785954
TCAF1	1217.02	-0.525389	0.125775	-4.17721	2.95e-05	0.000459903	1014.22	1488.52	8.42529	12.3653
NUDCD1	910.187	0.777728	0.186218	4.17643	2.96e-05	0.000460982	1258.48	682.486	15.264	8.27786
ACOT9	1090.34	0.53547	0.128233	4.17575	2.97e-05	0.000461838	1354.83	915.905	38.8411	26.2576
GDF6	890.23	-1.1898	0.285193	-4.17191	3.02e-05	0.000469174	364.346	1640.51	4.87407	21.946
ING4	383.234	-0.887382	0.212785	-4.17033	3.04e-05	0.000471929	234.578	491.71	8.02077	16.8127
APLP2	22076.2	-0.519523	0.124616	-4.16898	3.06e-05	0.000474156	18500.8	27023.6	229.455	335.158
KRI1	740.059	0.723167	0.173473	4.16875	3.06e-05	0.000474156	1000.1	572.364	16.4777	9.43029
EPC1	453.177	-0.599889	0.143947	-4.16743	3.08e-05	0.000476369	360.44	562.239	3.58272	5.58858
CPD	3141.38	-0.448542	0.107642	-4.16699	3.09e-05	0.000476769	2657.99	3670.87	14.2917	19.7379
SPECC1	1903.38	-0.592565	0.14224	-4.16595	3.1e-05	0.000478415	1398.14	2171.14	10.0849	15.6606
SGMS2	1092.5	0.624076	0.149841	4.16494	3.11e-05	0.000480021	1414.31	887.052	10.7036	6.7133
CDC42EP4	812.635	-0.49484	0.118872	-4.16279	3.14e-05	0.00048402	682.756	977.967	10.9009	15.6142
MAPRE1	3676.84	0.635563	0.152723	4.16154	3.16e-05	0.000486144	4610.38	2860.92	87.0233	54.0013
ZNF223	60.8815	-0.976295	0.234719	-4.15943	3.19e-05	0.000490128	36.5186	86.4963	0.747438	1.77035
PDGFRB	1486.02	-1.17193	0.281854	-4.15793	3.21e-05	0.000492805	627.603	2521.11	5.43804	21.8448
MRPL4	1117.56	0.600676	0.144523	4.15626	3.24e-05	0.000495887	1443.62	923.412	29.7314	19.0177
PBK	2754.75	0.815029	0.19618	4.1545	3.26e-05	0.000499174	3498.03	1818.59	80.5532	41.8787
STEAP1B	392.698	0.783264	0.188559	4.15394	3.27e-05	0.000499832	538.365	289.881	15.7534	8.48236
LOC100129550	101.145	-0.80147	0.193	-4.15269	3.29e-05	0.000502031	66.642	126.687	0.558855	1.06239
TPM3	11987.6	0.496157	0.119514	4.15146	3.3e-05	0.000504188	14509.6	10120	62.0359	43.2683
UCHL5	1021.92	0.608394	0.146678	4.14782	3.36e-05	0.000509853	1277.55	811.914	9.62886	6.11939
CLCF1	852.408	0.627664	0.15131	4.14819	3.35e-05	0.000509853	1020.16	637.348	25.5998	15.9936
RHBDF1	1070.99	-0.882441	0.21271	-4.14857	3.35e-05	0.000509853	696.781	1449.62	11.5301	23.9878
MED15	2432.23	0.596431	0.1438	4.14766	3.36e-05	0.000509853	3052.24	1959.17	39.4667	25.3329
NCEH1	5169.83	0.724807	0.174732	4.1481	3.35e-05	0.000509853	6990.13	3992.08	80.205	45.8053
MINPP1	1204.37	-0.539441	0.130068	-4.14736	3.36e-05	0.000509938	980.757	1455.95	14.7011	21.824
HEG1	5009.18	-0.763925	0.184206	-4.14712	3.37e-05	0.000509938	3646.44	6641.44	19.7179	35.9132
BCL3	395.167	-0.904898	0.218248	-4.14619	3.38e-05	0.00051147	236.198	507.535	6.27376	13.4809
PGM3	1753.46	0.633228	0.152853	4.14273	3.43e-05	0.000518678	2220.2	1380.33	17.2808	10.7437
ARHGAP5-AS1	41.9417	-0.993361	0.239846	-4.14166	3.45e-05	0.000520548	20.1736	50.3577	0.779708	1.94632
MN1	740.482	-0.78033	0.188456	-4.14064	3.46e-05	0.000522299	530.767	984.036	3.47784	6.44787
YWHAG	8700.83	0.431808	0.104308	4.13976	3.48e-05	0.0005236	10306.7	7560.14	136.187	99.8949
DENND4C	909.406	-0.456032	0.110164	-4.13958	3.48e-05	0.0005236	756.959	1051.71	4.60977	6.40476
RBM17	1404.15	0.496328	0.119935	4.1383	3.5e-05	0.00052597	1708.54	1191.46	21.3559	14.8927
EID2	282.293	-0.639275	0.154502	-4.13765	3.51e-05	0.000526885	220.644	356.485	7.84223	12.6703
H3F3AP4	144.248	-0.833635	0.201636	-4.13436	3.56e-05	0.00053391	97.1615	191.065	2.30831	4.53922
DYRK1A	937.089	-0.586828	0.141982	-4.13312	3.58e-05	0.00053624	740.442	1143.58	5.30454	8.19262
CENPW	768.155	0.650328	0.157392	4.13191	3.6e-05	0.000538487	976.809	597.672	12.0966	7.40146
CXXC4	134.569	-1.13839	0.275553	-4.13128	3.61e-05	0.000539396	51.0589	185.038	0.4532	1.6424
AGTRAP	1080.63	0.505067	0.12235	4.12805	3.66e-05	0.000545862	1196.46	828.189	46.2791	32.0344
SPTBN5	25.2748	1.16848	0.283049	4.1282	3.66e-05	0.000545862	39.6237	8.97059	0.167346	0.0378861
RRN3	1203.06	0.596942	0.144699	4.12542	3.7e-05	0.000551543	1456.22	934.071	9.53302	6.11481
INPP1	623.322	0.573302	0.139006	4.12429	3.72e-05	0.000553665	750.953	491.365	17.1891	11.2472
YTHDC1	1717.39	0.449523	0.109009	4.12373	3.73e-05	0.000554428	1984.35	1435.45	7.86094	5.68651
MFSD5	568.858	-0.706188	0.171294	-4.12268	3.74e-05	0.000556378	421.004	724.156	9.4062	16.1793
GLCCI1	191.515	-0.684389	0.166023	-4.12226	3.75e-05	0.000556799	142.106	239.218	1.46792	2.47107
MAPKAPK2	2576.48	0.426466	0.103464	4.12187	3.76e-05	0.000557139	3021.53	2224.93	42.5355	31.3213
CAB39	2119.34	0.434998	0.105602	4.11922	3.8e-05	0.000562983	2344.28	1715.29	26.7435	19.5679
2025-03-06	2323.12	-0.431644	0.1048	-4.11874	3.81e-05	0.000563577	2025.34	2760.17	10.3409	14.0928
ZNF780A	186.977	-0.703512	0.170837	-4.11803	3.82e-05	0.000564711	136.936	234.533	0.903128	1.5468
ZBED8	105.265	-0.822832	0.19985	-4.11725	3.83e-05	0.000566031	73.3476	142.383	1.24153	2.41007
LINC00938	142.764	-0.824455	0.200332	-4.11545	3.86e-05	0.000569873	94.3635	184.431	2.1217	4.14681
ETV6	416.158	-0.746208	0.181366	-4.11436	3.88e-05	0.000571954	292.103	523.781	2.41923	4.33802
UBE2H	2662.3	-0.653127	0.158769	-4.11369	3.89e-05	0.00057301	1918.39	3145.34	18.4035	30.1739
CCNB2	3137.17	0.807927	0.196456	4.1125	3.91e-05	0.000575377	3963.76	2071.65	126.693	66.2159
KATNBL1	657.858	0.512227	0.124636	4.10979	3.96e-05	0.000581561	762.493	525.009	13.7779	9.48666
CCNE1	70.1215	-1.00131	0.243744	-4.10806	3.99e-05	0.000585325	47.1239	115.748	1.19832	2.94336
RAB18	1847.71	0.448596	0.109224	4.10712	4.01e-05	0.000586484	2082.98	1508.17	20.2612	14.67
CLSTN3	1119.28	-0.883284	0.215061	-4.10714	4.01e-05	0.000586484	710.301	1486.41	8.78745	18.389
ZSCAN9	134.126	-0.792487	0.192969	-4.10682	4.01e-05	0.000586631	98.8801	185.673	2.6679	5.00969
CHRM3	17.8835	1.1733	0.286084	4.10126	4.11e-05	0.00060028	28.8111	5.32227	0.519655	0.0959957
METRNL	477.103	0.685761	0.167274	4.09962	4.14e-05	0.000603905	607.366	359.176	9.33013	5.51753
DAPK3	1665.4	0.626864	0.152969	4.09798	4.17e-05	0.000607574	2177.28	1359.66	46.6659	29.1418
SHCBP1	2446.84	0.878285	0.214344	4.09755	4.18e-05	0.000608067	3476.27	1673.19	53.2525	25.6313
SGPL1	1444.73	-0.647879	0.158215	-4.09493	4.22e-05	0.000614349	1129.01	1841.99	9.68936	15.8082
ETF1	4613.25	0.513894	0.125517	4.09423	4.24e-05	0.000615568	5504.52	3782.89	63.9146	43.9243
SUPT5H	3911.21	0.442429	0.108079	4.09357	4.25e-05	0.000616037	4563.59	3319	58.4141	42.4833
DAPK1	872.168	-0.620749	0.151636	-4.09367	4.25e-05	0.000616037	682.176	1086.17	5.38245	8.57002
ZNF623	356.516	-0.735918	0.179799	-4.09302	4.26e-05	0.000616879	264.951	469.275	1.51337	2.68044
LNPEP	522.523	-0.771424	0.188494	-4.09256	4.27e-05	0.00061745	375.331	690.606	3.87546	7.13082
HSD17B1	289.052	-0.671862	0.164203	-4.09164	4.28e-05	0.000618661	223.321	372.052	4.95595	8.2566
LINC01279	796.077	-0.962165	0.235158	-4.09158	4.28e-05	0.000618661	510.019	1190.92	4.87854	11.3916
CCT5	8789.05	0.62883	0.153696	4.09139	4.29e-05	0.000618661	11482.1	7157.91	140.994	87.8948
DNTTIP2	1511.17	0.655723	0.16028	4.09111	4.29e-05	0.000618766	1917.59	1166.85	34.8791	21.2238
CELSR1	2597.26	-0.569613	0.139297	-4.0892	4.33e-05	0.000623238	2138.88	3258.95	9.29817	14.1674
DDX17	5455.48	-0.580766	0.142116	-4.08655	4.38e-05	0.000629756	4553.76	7005.27	47.0098	72.3175
PRR13	1694.67	0.425355	0.104119	4.08529	4.4e-05	0.000632539	1861.32	1371.59	77.117	56.8267
NOP16	454.848	0.644656	0.15782	4.08475	4.41e-05	0.000633363	604.521	371.428	15.7196	9.65839
ZNF436	297.675	-0.92434	0.226534	-4.08035	4.5e-05	0.0006448	179.22	397.654	1.84322	4.08975
CLASRP	704.494	0.725745	0.177928	4.07886	4.53e-05	0.000648276	946.498	538.638	20.939	11.9161
CEP135	460.287	0.703394	0.172482	4.07807	4.54e-05	0.000649823	577.873	336.048	4.98881	2.90112
TSC22D3	653.01	-1.00737	0.247036	-4.07783	4.55e-05	0.000649823	321.431	821.132	5.66947	14.4833
LRP6	1089.83	-0.782128	0.191848	-4.07681	4.57e-05	0.000651352	792.193	1475.15	3.88952	7.2427
ZNF627	179.094	-0.760668	0.186581	-4.07687	4.56e-05	0.000651352	125.941	229.139	2.06538	3.75779
DLC1	4057.4	0.730128	0.179148	4.07556	4.59e-05	0.000654194	5736.55	3251.75	33.037	18.727
TAF5L	653.797	0.480698	0.117983	4.07428	4.62e-05	0.000656845	779.347	550.014	6.30901	4.4525
RP9	208.793	0.614617	0.150858	4.07415	4.62e-05	0.000656845	257.366	162.378	11.3771	7.17806
CCDC137	718.071	0.695962	0.170944	4.0713	4.68e-05	0.000664257	940.586	550.769	22.0915	12.9359
KCTD4	159.523	-0.765245	0.188011	-4.07022	4.7e-05	0.000666661	104.713	191.814	2.44663	4.48175
DEPDC1	3240	0.885405	0.217707	4.06696	4.76e-05	0.000674589	4321.5	2052.01	39.3453	18.6826
AREL1	1507.58	-0.681937	0.167687	-4.06673	4.77e-05	0.000674589	1204.9	2029.21	10.9559	18.4513
ZNF646	448.941	-0.744198	0.182976	-4.06718	4.76e-05	0.000674589	344.785	616.361	2.74975	4.91565
SRPRB	1115.29	0.63657	0.156539	4.06652	4.77e-05	0.000674589	1405.74	869.721	24.6194	15.2318
NUDCD2	841.07	0.516533	0.127031	4.0662	4.78e-05	0.000674828	979.618	671.91	51.1618	35.0913
RNASEH1	840.435	0.504076	0.123989	4.06547	4.79e-05	0.000676257	1036.62	718.013	24.405	16.904
TUBB6	7698.11	0.608161	0.149671	4.0633	4.84e-05	0.000681894	7762.6	4922.17	116.147	73.6474
DGKZ	1774.62	0.557444	0.137202	4.06295	4.85e-05	0.000682229	2225.95	1474.89	20.3298	13.4703
TSPAN12	229.524	0.742955	0.182919	4.06166	4.87e-05	0.000685335	280.739	156.778	5.42103	3.02737
SIPA1L1	1067.56	0.530473	0.130649	4.06029	4.9e-05	0.000688672	1297.15	879.179	7.5627	5.12584
ECT2	4337.32	0.807228	0.199012	4.05619	4.99e-05	0.000700171	5687.12	2965.82	62.5716	32.6309
CEP85	674.3	0.608945	0.150157	4.0554	5e-05	0.000701837	853.515	541.083	9.83658	6.23586
FXYD5	2721.4	0.522387	0.128865	4.05375	5.04e-05	0.000706102	3386.59	2309.85	102.489	69.9034
ZNF587	416.225	-0.582762	0.143793	-4.05278	5.06e-05	0.000708337	354.497	545.954	2.5301	3.89657
BAG3	3731.29	0.543323	0.134147	4.05019	5.12e-05	0.000715487	4452.08	2984.69	85.8017	57.5219
SYNPO2	47.2712	-1.12017	0.276624	-4.04941	5.13e-05	0.00071717	18.634	67.4104	0.0657062	0.237698
RBBP4	2629.42	-0.5288	0.130598	-4.04908	5.14e-05	0.000717474	2238.83	3298.57	13.8246	20.3684
RRS1	1126.9	0.856516	0.211586	4.04808	5.16e-05	0.000719827	1553.59	764.485	45.0875	22.1864
MMP16	1060.92	-0.609934	0.150695	-4.04747	5.18e-05	0.00072098	797.823	1259.51	6.2353	9.84353
ADAM19	2957.27	-0.707279	0.174798	-4.04627	5.2e-05	0.000723964	2331.59	4027.97	17.6809	30.5448
CEP164	1194.5	0.600304	0.148448	4.04388	5.26e-05	0.000730572	1470.57	939.073	12.7801	8.16113
DHRS11	78.2906	-0.962317	0.237981	-4.04367	5.26e-05	0.000730572	55.3263	128.495	0.857081	1.99057
BATF3	52.136	0.994168	0.245908	4.04284	5.28e-05	0.00073178	83.1593	33.624	4.197	1.69698
APBB1IP	149.729	0.749823	0.18547	4.04282	5.28e-05	0.00073178	204.807	113.592	3.84533	2.13273
LOC100287036	58.5792	-0.904865	0.223902	-4.04135	5.31e-05	0.000735671	38.8116	84.1315	1.59468	3.45676
RNF115	667.126	0.479387	0.118645	4.04053	5.33e-05	0.00073678	783.876	553.629	19.9128	14.0639
ANKS3	356.56	0.602155	0.149025	4.04064	5.33e-05	0.00073678	447.394	285.41	7.50109	4.78523
TKT	17068.9	-0.588771	0.145842	-4.03706	5.41e-05	0.000747023	12698.7	19692.9	203.403	315.434
GAK	1608.21	0.465512	0.115319	4.03675	5.42e-05	0.000747277	1892.33	1350.91	20.6594	14.7485
SLC26A4	273.423	-0.772065	0.1913	-4.03589	5.44e-05	0.000749269	203.307	375.634	2.04258	3.77391
MINA	528.276	0.636425	0.157701	4.03564	5.45e-05	0.000749331	689.175	426.329	6.38739	3.95129
GREM1	9531.02	0.633626	0.15707	4.03403	5.48e-05	0.000753749	11302.1	7004.3	67.6141	41.9027
NUPL2	405.938	0.521905	0.129411	4.03294	5.51e-05	0.000756523	505.027	344.961	13.9144	9.50428
GABARAP	3346.43	-0.623916	0.15473	-4.03229	5.52e-05	0.000757868	2445.82	3912.45	135.603	216.918
GLI1	55.3326	-1.10477	0.274001	-4.03201	5.53e-05	0.000758042	27.6835	90.9511	0.378835	1.24462
ZNF292	573.951	-0.705614	0.175019	-4.03165	5.54e-05	0.000758462	406.831	702.998	1.9943	3.44612
CABYR	140.205	0.698884	0.173369	4.03119	5.55e-05	0.000759198	161.363	94.063	3.32328	1.93723
RAD51	510.941	0.924833	0.229453	4.0306	5.56e-05	0.000760371	762.461	342.558	15.5991	7.00835
DYNLT3	954.116	0.548679	0.13621	4.02817	5.62e-05	0.000767516	1053.99	703.423	23.5485	15.7161
SLC16A13	69.7948	-0.925082	0.229728	-4.02685	5.65e-05	0.000771081	43.6404	96.9796	1.23607	2.74686
TFG	3309.09	0.476713	0.118408	4.02603	5.67e-05	0.000773029	3747.01	2651.77	87.7561	62.1052
EHD1	3011.29	0.507079	0.125981	4.02503	5.7e-05	0.000775554	3658.61	2526.03	45.9863	31.7504
MARK3	1723.23	0.453273	0.112632	4.02437	5.71e-05	0.000776975	1983.36	1429.83	27.8178	20.0543
PDSS1	152.883	0.760191	0.188999	4.02218	5.77e-05	0.000782699	212.037	116.132	6.48828	3.55361
LOC100506990	251.507	0.609068	0.151426	4.0222	5.77e-05	0.000782699	322.113	204.057	3.83641	2.43035
SNX27	507.454	-0.63444	0.157837	-4.01958	5.83e-05	0.000790623	399.276	644.293	2.79017	4.50237
HNRNPH1	9666.82	0.612838	0.152491	4.01884	5.85e-05	0.000792351	11891	7506.13	257.087	162.285
UNK	602.467	-0.485061	0.120724	-4.01794	5.87e-05	0.000794627	529.106	752.029	5.19253	7.38025
ZNF667-AS1	170.481	-0.696709	0.173458	-4.01657	5.91e-05	0.00079846	122.152	209.223	3.39383	5.81299
PPP1CC	4613.52	0.480821	0.119716	4.01634	5.91e-05	0.000798489	5449.04	3843.38	107.441	75.7817
CMIP	825.737	-0.503817	0.125451	-4.01605	5.92e-05	0.000798695	674.287	973.414	7.41214	10.7003
SH2D5	401.258	0.905582	0.22551	4.0157	5.93e-05	0.000799095	592.688	272.938	7.65369	3.5246
RAI14	6527.3	0.563137	0.140428	4.01016	6.07e-05	0.000817324	8021.55	5286.17	67.8195	44.6928
PARPBP	595.409	0.768517	0.191677	4.00943	6.09e-05	0.000819055	740.97	401.959	11.9071	6.45933
NUDT15	930.505	0.607585	0.151633	4.00695	6.15e-05	0.000826408	1165.67	739.329	23.2339	14.7361
JMY	335.235	-0.840721	0.20982	-4.00686	6.15e-05	0.000826408	208.855	419.012	1.13271	2.27248
MNT	525.348	-0.648962	0.162073	-4.00412	6.22e-05	0.000835244	399.421	653.518	4.08417	6.68236
CNNM1	207.182	-0.769798	0.192281	-4.0035	6.24e-05	0.00083664	156.013	287.509	1.29602	2.38837
RUNX1	1658.24	0.503864	0.125864	4.00324	6.25e-05	0.000836777	2039.28	1411.44	12.6508	8.75591
ODF2L	489.679	0.534614	0.133619	4.00104	6.31e-05	0.000843786	561.311	379.157	4.29467	2.90098
GPSM2	931.797	0.852073	0.213119	3.99811	6.39e-05	0.000853482	1220.71	600.798	19.9268	9.8074
PRR11	4701.24	0.771132	0.192894	3.99769	6.4e-05	0.000854174	6482.47	3508.17	49.583	26.8332
STRIP1	586.006	-0.71433	0.178728	-3.99675	6.42e-05	0.000856757	464.312	807.926	6.64787	11.5676
RSRP1	369.4	-0.859847	0.215187	-3.99581	6.45e-05	0.000857714	249.363	510.738	8.42736	17.2607
HNRNPH3	6511.59	0.633866	0.158626	3.99597	6.44e-05	0.000857714	8089.86	5008.65	166.059	102.811
BTBD3	807.41	0.510679	0.127791	3.9962	6.44e-05	0.000857714	972.34	669.448	9.27216	6.38381
CDS2	1296.61	-0.527425	0.132035	-3.99458	6.48e-05	0.000861359	1081.26	1592.12	5.7421	8.45507
GEM	957.114	-0.562169	0.140762	-3.99374	6.5e-05	0.000863592	689.082	1045.87	15.6284	23.7205
2025-03-03	106.568	0.925259	0.23173	3.99284	6.53e-05	0.000866069	164.813	73.825	1.9447	0.871094
CREBRF	270.252	-0.78271	0.196157	-3.99022	6.6e-05	0.000874856	154.647	291.186	0.878962	1.65501
KAT6B	1042.78	-0.611179	0.15319	-3.98968	6.62e-05	0.000876014	829.34	1312.46	4.83128	7.6457
DIAPH3	2455.78	0.843322	0.211485	3.98762	6.67e-05	0.00088283	3589.87	1788.82	34.606	17.244
TFE3	3245.76	0.423428	0.106274	3.9843	6.77e-05	0.000894385	3655.72	2696.57	52.4476	38.6869
ANK3	352.471	-0.906648	0.227727	-3.98129	6.85e-05	0.000904937	212.084	465.631	0.557257	1.22346
FKBP1A	6380.42	-0.547982	0.137697	-3.97961	6.9e-05	0.000910512	5332.55	7991.4	132.207	198.126
ANGPTL2	984.127	-0.756421	0.190121	-3.97863	6.93e-05	0.000913398	611.643	1115.73	8.47781	15.4648
MARCKSL1	2504.11	-0.446549	0.112254	-3.97803	6.95e-05	0.000914861	2175.52	3002.61	68.957	95.1733
BCCIP	2096.09	0.521562	0.131149	3.97686	6.98e-05	0.000918492	2568.29	1752.05	37.6985	25.7174
LZTS2	2800.2	-0.665526	0.167392	-3.97586	7.01e-05	0.000921521	2035.11	3386.81	35.379	58.8773
PPAPDC1A	1605.24	-0.489566	0.12315	-3.97537	7.03e-05	0.000922545	1245.56	1779.03	40.5445	57.9096
MIER3	338.041	-0.63252	0.159121	-3.9751	7.04e-05	0.000922728	251.504	405.402	2.38455	3.84367
TRAF2	467.605	0.639048	0.160776	3.97478	7.04e-05	0.000923085	600.351	369.708	13.0539	8.03883
NUMB	1913.14	0.505442	0.12717	3.97453	7.05e-05	0.000923217	2233.76	1544.03	30.3498	20.9786
ZNF248	241.699	-0.634822	0.159742	-3.97405	7.07e-05	0.000923574	185.299	299.632	1.51741	2.45368
PTPN21	804.933	0.574444	0.144551	3.97399	7.07e-05	0.000923574	985.843	642.995	7.85351	5.12229
ZDHHC7	2236.16	0.437867	0.110238	3.97202	7.13e-05	0.00093039	2625.33	1914.71	39.7133	28.9637
ACVR2B	102.094	-0.782251	0.197028	-3.97026	7.18e-05	0.000936396	76.4363	143.242	0.332753	0.62358
WDR5B	130.487	-0.846902	0.213344	-3.96965	7.2e-05	0.000937934	85.0779	172.35	1.00699	2.03995
FBXO21	779.054	-0.566072	0.142628	-3.96888	7.22e-05	0.00094008	651.066	990.322	7.61507	11.5831
ZNF33B	464.462	-0.532873	0.134295	-3.96793	7.25e-05	0.000941348	352.95	521.886	2.06435	3.05243
SETD3	957.172	0.539011	0.135837	3.96808	7.25e-05	0.000941348	1148.35	772.347	17.2289	11.5877
MYB	32.8363	-1.1004	0.277326	-3.9679	7.25e-05	0.000941348	18.9761	62.2866	0.255443	0.838457
B3GNT5	436.31	0.647001	0.163165	3.96532	7.33e-05	0.000949797	526.237	321.977	6.31924	3.86642
RGMB	2729.21	0.84326	0.212658	3.96534	7.33e-05	0.000949797	4190.4	2086.72	45.2989	22.5578
TRABD	862.131	0.677892	0.171113	3.96166	7.44e-05	0.000963592	1174.61	697.535	25.1211	14.9181
SLITRK6	6.68519	-1.05169	0.265483	-3.96144	7.45e-05	0.00096361	0.638006	14.7234	0.00755513	0.174351
SLCO1A2	9.20542	1.11599	0.281784	3.96045	7.48e-05	0.000964986	21.0209	3.42513	0.132227	0.0215449
ZNF830	211.703	-0.710053	0.179287	-3.96044	7.48e-05	0.000964986	161.454	279.899	4.82419	8.36327
UBE2E2	409.034	0.525456	0.132664	3.96081	7.47e-05	0.000964986	491.804	334.409	13.8349	9.40724
KAT7	756.508	-0.574179	0.145032	-3.95898	7.53e-05	0.000969981	627.553	961.236	8.52179	13.053
ABCA7	560.238	-0.676109	0.170797	-3.95855	7.54e-05	0.00097083	394.007	663.078	2.86118	4.8151
PREX1	1149.86	-0.474551	0.119909	-3.95758	7.57e-05	0.000973909	986.967	1392.43	7.36699	10.3935
CMC2	551.843	0.607111	0.153423	3.95711	7.59e-05	0.00097491	683.675	433.561	46.3686	29.4052
FAM171A1	1852.02	0.521315	0.131801	3.95531	7.64e-05	0.000981385	2388.77	1629.22	29.9416	20.4212
EIF3B	4576.48	0.453808	0.114763	3.95432	7.68e-05	0.00098454	5566.81	4009.2	89.4565	64.4264
RAB10	3320.84	-0.680106	0.172007	-3.95393	7.69e-05	0.000985257	2438.92	4118.25	31.9028	53.8697
BFSP1	128.35	-0.939153	0.237606	-3.95256	7.73e-05	0.000990007	69.6382	162.645	1.14584	2.67618
RAB30	321.799	-0.719997	0.182231	-3.95101	7.78e-05	0.000994068	241.504	423.853	1.14816	2.0151
CKAP2L	3162.07	0.848776	0.214809	3.9513	7.77e-05	0.000994068	4256.37	2095.94	44.004	21.6687
LOC389831	335.376	0.588681	0.148998	3.95093	7.78e-05	0.000994068	397.83	256.36	8.16277	5.26006
MT2A	33591.1	0.530888	0.134395	3.95022	7.81e-05	0.000996093	39319.3	26599.5	4646.1	3143.09
MRPL18	1165.72	0.513948	0.130126	3.94963	7.83e-05	0.000997668	1355.6	930.138	68.6967	47.1357
KLHL2	574.388	0.447045	0.113193	3.94941	7.83e-05	0.000997671	647.896	469.133	9.72345	7.04062
GARS	3498.57	0.544345	0.137986	3.94492	7.98e-05	0.0010156	4293.75	2872.24	77.3319	51.7301
MRPL3	2517.95	0.533097	0.135158	3.94426	8e-05	0.00101748	3062.95	2068.41	85.9684	58.0543
ATP6V0B	2636.12	0.487993	0.123729	3.94403	8.01e-05	0.00101753	2994.24	2097.5	71.6859	50.2168
UBQLN2	881.606	-0.649969	0.16486	-3.94254	8.06e-05	0.00102296	695.698	1140.99	10.0773	16.5276
GMPPA	887.341	0.420458	0.10669	3.94095	8.12e-05	0.00102883	1006.37	743.987	26.6306	19.6874
TRAF6	302.888	-0.570926	0.14494	-3.93906	8.18e-05	0.00103511	243.419	371.596	1.50253	2.29372
PRKAG2	1758.73	0.74003	0.187863	3.9392	8.18e-05	0.00103511	2131.33	1187.23	23.7345	13.2209
CKAP2	5074.82	0.852163	0.216491	3.93625	8.28e-05	0.00104539	6653.78	3255.79	76.1692	37.2707
TCP1	6340.25	0.494659	0.125661	3.93645	8.27e-05	0.00104539	7614.81	5306.84	153.695	107.111
WNT5B	2230.61	0.592107	0.150495	3.93439	8.34e-05	0.00105164	3025.23	1942.09	64.8121	41.607
EIF3J	1777.72	0.586545	0.149081	3.9344	8.34e-05	0.00105164	2196.26	1416.87	42.5091	27.4238
ARSK	311.442	-0.586299	0.149117	-3.93181	8.43e-05	0.001062	260.53	403.505	3.8562	5.97242
ERI2	359.474	0.568765	0.144819	3.92743	8.59e-05	0.00107961	431.352	282.69	5.07762	3.32766
FAM196B	754.385	0.677368	0.17247	3.92745	8.59e-05	0.00107961	1066.58	633.461	14.8836	8.83962
RARA	1467.16	-0.786095	0.200192	-3.92671	8.61e-05	0.00108187	971.102	1835.24	11.0249	20.8355
NABP1	597.467	0.64793	0.165041	3.92588	8.64e-05	0.00108463	759.842	463.667	9.36757	5.71624
IMPA1	907.925	0.536669	0.136743	3.92465	8.69e-05	0.00108919	1020.16	686.848	14.0418	9.45404
TOP2B	3081.62	-0.441717	0.11263	-3.92183	8.79e-05	0.00110106	2656.99	3655.61	24.6208	33.8745
RBM4B	273.768	-0.643406	0.164134	-3.92001	8.85e-05	0.00110743	217.549	354.205	5.8411	9.51023
RANGAP1	7904.96	0.769935	0.196403	3.92019	8.85e-05	0.00110743	10752.6	5800.22	116.01	62.5783
VDAC2	4631.97	0.387376	0.0988521	3.91874	8.9e-05	0.00111127	5237.79	3970.71	123.078	93.3042
DHRS1	384.81	-0.827855	0.21125	-3.91884	8.9e-05	0.00111127	275.437	545.089	7.90551	15.645
YPEL2	142.64	-0.902509	0.230331	-3.91831	8.92e-05	0.00111158	80.2689	177.343	0.759586	1.6782
THBD	392.995	-0.919238	0.234605	-3.91824	8.92e-05	0.00111158	202.751	459.787	2.48966	5.64591
UTP14A	567.247	0.577817	0.147498	3.91746	8.95e-05	0.00111419	681.012	442.701	13.1708	8.56186
ZNF691	88.6089	-0.751601	0.191974	-3.91512	9.04e-05	0.00112408	63.0729	114.526	1.63325	2.96561
MAP3K4	982.093	0.581597	0.148594	3.914	9.08e-05	0.0011283	1195.73	774.26	10.321	6.68306
B4GALT2	1719.97	0.428604	0.109535	3.91294	9.12e-05	0.00113223	2018.37	1482.07	41.2084	30.2589
ZNF202	244.22	0.656255	0.167754	3.91201	9.15e-05	0.00113562	300.842	181.915	3.33292	2.01537
ABI1	1523.97	0.395948	0.101225	3.91157	9.17e-05	0.00113667	1685.2	1269.58	22.0962	16.6467
PPA1	3398.73	0.45634	0.11669	3.91069	9.2e-05	0.00113981	4099.72	2945.88	155.898	112.022
AK6	480.01	0.678138	0.173416	3.91047	9.21e-05	0.00113987	572.429	339.107	10.8754	6.44257
CREB5	134.865	0.906548	0.231875	3.90964	9.24e-05	0.00114262	206.086	93.8025	1.14081	0.519254
ATXN7L1	119.577	-0.678114	0.173455	-3.90946	9.25e-05	0.00114262	86.8296	146.273	0.607286	1.02304
DUS1L	924.548	0.509799	0.130418	3.90898	9.27e-05	0.00114387	1146.98	789.049	30.142	20.7358
CLMP	2678.88	0.446046	0.114119	3.90859	9.28e-05	0.00114471	3129.18	2266.48	58.9077	42.6672
ASCC2	1225.04	0.431766	0.110497	3.90748	9.33e-05	0.00114897	1494.42	1094.74	26.2095	19.1998
MSRB3	3305.14	0.532943	0.136465	3.90535	9.41e-05	0.0011581	4204.77	2838.73	44.6165	30.1215
HPCAL1	6536.01	-0.523182	0.134006	-3.90416	9.46e-05	0.00116281	4886.62	7181.93	88.2989	129.774
GTSE1	2173.98	0.895619	0.229487	3.90269	9.51e-05	0.00116883	2952.7	1356.48	46.9761	21.5809
REPS1	781.085	0.412633	0.105736	3.90249	9.52e-05	0.00116883	909.273	676.256	11.2014	8.33088
PRRT3	309.17	-0.832336	0.213317	-3.90187	9.55e-05	0.00117076	212.422	424.806	2.79636	5.59223
ZSWIM1	170.99	-0.703885	0.180545	-3.89866	9.67e-05	0.00118534	126.361	218.095	2.24477	3.87442
C1orf52	388.527	0.523297	0.134244	3.89809	9.7e-05	0.00118711	457.842	311.784	6.68673	4.55357
MYD88	285.04	-0.762343	0.195629	-3.89689	9.74e-05	0.00119198	204.278	375.898	3.52033	6.47786
PP7080	261.859	-0.534167	0.137162	-3.89442	9.84e-05	0.00120313	222.835	330.325	6.3297	9.383
RNF149	747.538	0.511504	0.131351	3.89418	9.85e-05	0.00120328	870.211	597.947	14.5164	9.97461
KIAA1279	2177.13	0.538055	0.138218	3.8928	9.91e-05	0.00120907	2598.39	1746.07	50.5491	33.9681
FAM217B	332.363	-0.62302	0.160101	-3.89142	9.97e-05	0.00121491	267.477	428.121	2.51479	4.02516
NSDHL	774.173	0.797424	0.204941	3.891	9.98e-05	0.00121597	1027.85	535.962	31.2206	16.2796
ZEB1	1206.71	0.606509	0.155915	3.89	0.000100242	0.00121991	1561.6	988.673	12.1014	7.66156
VGLL4	1622.73	-0.558938	0.143696	-3.88971	0.000100363	0.00122031	1187.8	1800.58	11.5131	17.4526
ZNF417	96.2887	-0.768789	0.197705	-3.88856	0.00010084	0.00122504	73.1761	134.873	0.769374	1.41806
NOL10	835.035	0.601625	0.154903	3.88388	0.000102802	0.0012478	1047.34	666.108	14.824	9.42806
PIGA	227.796	0.718886	0.185219	3.88127	0.000103911	0.00126016	291.219	165.769	3.9764	2.26346
NT5C3A	512.444	0.603108	0.155508	3.8783	0.000105189	0.00127456	634.11	402.667	14.6706	9.31601
SMIM15	1282.96	0.521508	0.134531	3.87648	0.00010598	0.00128303	1509.97	1028.99	25.8683	17.6283
NIPA2	1999.76	0.489395	0.126303	3.87475	0.000106733	0.00129104	2395.15	1675.48	33.8525	23.6808
LRRC41	1861.41	-0.545908	0.140898	-3.8745	0.000106844	0.00129126	1547.79	2318.58	25.9945	38.9396
LRBA	2187.74	-0.479339	0.12374	-3.87375	0.000107174	0.00129413	1865.12	2644.54	9.26676	13.1392
IDI2	72.6486	0.858565	0.221664	3.87327	0.000107383	0.00129554	101.227	48.9474	3.68787	1.78323
MAFF	544.573	0.841568	0.217316	3.87256	0.000107699	0.00129823	729.056	359.609	14.2672	7.03733
RBM14	1227.13	0.597082	0.154277	3.8702	0.000108745	0.00130522	1505.4	960.426	13.7845	8.79437
ZC3H15	2260.08	0.504231	0.13028	3.87037	0.00010867	0.00130522	2676.59	1849.59	62.1281	42.9322
STX18	555.056	0.487653	0.125989	3.87062	0.000108561	0.00130522	624.493	437.735	14.3342	10.0475
FABP5	1548.85	0.450394	0.116353	3.87094	0.000108417	0.00130522	1826.91	1318.33	123.736	89.2905
TMEM71	324.88	0.912415	0.235716	3.87082	0.000108471	0.00130522	435.802	193.987	10.092	4.49223
CCM2	1245.26	0.556707	0.143869	3.86955	0.000109035	0.00130758	1539.87	1017.81	35.1336	23.2224
RAB5B	2382.2	-0.567102	0.146568	-3.86922	0.000109185	0.00130826	1902.12	2902.4	17.3499	26.4737
ARHGEF3	443.661	-0.785327	0.203096	-3.86677	0.000110286	0.00131918	258.988	492.444	2.67975	5.09533
CLDN2	28.9135	-1.08259	0.279959	-3.86694	0.000110211	0.00131918	12.2892	44.3409	0.176976	0.638552
CRABP2	177.042	-0.737712	0.190836	-3.86569	0.000110774	0.0013239	126.177	227.271	5.36693	9.66695
REPS2	244.087	-0.773681	0.200166	-3.8652	0.000110999	0.00132546	160.953	301.662	1.00199	1.87797
MEIS1	179.01	-0.665494	0.172243	-3.86369	0.000111688	0.00133254	134.816	225.69	2.09834	3.51275
DPF2	888.399	-0.573041	0.148393	-3.86165	0.000112623	0.00134191	705.842	1082.31	13.8129	21.1802
SLC25A25	439.94	0.559209	0.144814	3.86156	0.000112665	0.00134191	555.883	366.409	6.26213	4.12767
CENPJ	582.322	0.813881	0.210834	3.8603	0.00011325	0.00134773	796.548	406.675	7.53775	3.84837
NAV2	5331.79	0.915648	0.237254	3.85935	0.000113687	0.00135178	7204.04	3186.67	30.3347	13.4184
CSGALNACT2	973.473	0.700874	0.181623	3.85895	0.000113874	0.00135286	1209.15	699.193	15.8838	9.18478
PLLP	15.5865	-1.09944	0.284983	-3.85792	0.000114355	0.00135627	4.97982	23.2232	0.164698	0.768065
ARHGEF10	1624.15	0.685772	0.177753	3.858	0.000114319	0.00135627	2186.35	1283.79	9.51206	5.58532
ANK1	25.2882	-1.08896	0.282301	-3.85745	0.000114574	0.00135657	7.86184	32.9176	0.0419398	0.175603
RNF139	673.535	-0.681404	0.176638	-3.85763	0.000114493	0.00135657	500.825	849.783	7.48674	12.7033
PSMD12	1511.53	0.518056	0.134374	3.85534	0.00011557	0.0013672	1817.13	1241.31	50.0651	34.2003
VKORC1L1	1525.16	0.505535	0.131148	3.85471	0.000115868	0.00136958	1849.65	1276.68	15.5321	10.7207
MSN	22356.5	0.533431	0.138462	3.85255	0.000116893	0.00138052	29348.9	19789	366.015	246.791
AFG3L1P	352.133	0.687658	0.178518	3.85205	0.000117135	0.00138195	476.188	278.969	6.04056	3.53879
TESK1	761.166	0.548547	0.14241	3.85189	0.000117212	0.00138195	903.102	600.815	17.7715	11.823
TTC9C	234.404	-0.738495	0.191744	-3.85146	0.000117414	0.00138317	172.747	310.164	7.50904	13.4823
CUL4B	3651.51	-0.555366	0.144254	-3.84992	0.000118158	0.00139076	2814.67	4254.71	24.5086	37.0476
BTN2A1	990.363	0.419288	0.108962	3.84802	0.000119076	0.0014004	1140.05	843.176	15.3133	11.3256
ZNF230	53.6545	-0.899901	0.233946	-3.84662	0.000119757	0.00140722	34.0809	75.5553	0.408365	0.90532
PTPDC1	163.846	0.680249	0.176915	3.84506	0.000120525	0.00141505	213.385	126.012	2.17248	1.28294
SKA3	817.698	0.801682	0.208697	3.84137	0.00012235	0.00143452	1121.27	580.071	19.0183	9.83886
GNA11	3197.8	0.557118	0.145034	3.84129	0.000122388	0.00143452	3973.05	2624.53	47.4566	31.3491
CAPN10	480.368	0.530063	0.138018	3.84054	0.000122766	0.00143775	587.924	397.187	11.0092	7.43758
TP53INP2	737.737	-0.592057	0.154195	-3.83966	0.000123204	0.00144168	570.343	889.347	6.84723	10.677
FAXDC2	274.09	-0.99475	0.259132	-3.83877	0.00012365	0.00144569	135.153	360.648	2.23274	5.95792
KIAA0513	278.442	-0.55275	0.144029	-3.83776	0.00012416	0.00145043	226.011	341.111	1.29768	1.95855
SLCO1B3	187.159	0.968365	0.252383	3.83689	0.000124603	0.0014544	288.713	116.505	4.74579	1.91509
C10orf88	432.749	0.523389	0.136424	3.83648	0.00012481	0.00145514	535.751	364.214	8.59258	5.84141
C11orf71	75.1959	-0.84504	0.220272	-3.83635	0.000124875	0.00145514	45.264	93.2158	1.0027	2.06495
FARSB	1397.46	0.560473	0.146131	3.83543	0.000125346	0.00145942	1786.84	1177.07	33.0595	21.7778
CCDC82	660.649	0.546175	0.142447	3.83423	0.000125959	0.00146445	795.78	530.8	14.432	9.62645
APOBEC3F	33.1799	-0.991999	0.258726	-3.83417	0.000125988	0.00146445	17.0898	45.9795	0.168182	0.452488
LIMK2	1242.66	-0.73071	0.190646	-3.83281	0.000126686	0.00147135	859.512	1536.4	8.58135	15.3394
GIGYF1	921.491	-0.732021	0.191034	-3.8319	0.00012716	0.00147562	717.659	1281.74	5.6141	10.0268
TET2	603.016	-0.546327	0.142671	-3.82927	0.000128525	0.00149023	477.428	716.276	1.54283	2.31468
RAD23A	2723.96	0.429197	0.112194	3.82548	0.000130517	0.00151208	3208.99	2353.92	87.2482	63.9999
TTL	2479.7	0.49539	0.12952	3.82482	0.000130865	0.00151486	3067.67	2134.18	29.4174	20.4657
EXT1	3941.3	0.475038	0.124236	3.82367	0.000131478	0.00152068	4825.18	3412.77	71.0792	50.2732
WDR46	1296.66	0.402391	0.105276	3.82226	0.000132235	0.00152819	1505.12	1127.42	6.30716	4.72444
PTCH1	111.051	-0.965626	0.252694	-3.82133	0.000132734	0.00153268	62.9929	157.447	0.346573	0.866241
TRMT1L	480.301	-0.598003	0.156534	-3.82029	0.000133297	0.00153792	381.306	598.255	4.17577	6.55162
TMEM184B	3457.32	0.448621	0.117443	3.81989	0.000133513	0.00153914	4071.13	2940.73	51.9763	37.5443
PAXIP1-AS1	56.9753	-0.968947	0.25369	-3.81942	0.000133768	0.00154081	34.7294	86.5365	0.757143	1.8866
SNCA	1141.23	-0.364856	0.0955634	-3.81794	0.000134568	0.00154857	938.102	1216.98	13.3504	17.3192
CNTRL	698.743	0.719578	0.188481	3.81777	0.000134663	0.00154857	864.595	489.115	5.76054	3.25883
TNPO2	3459.7	0.591013	0.154824	3.81733	0.000134905	0.00155008	4419.81	2832.68	40.137	25.724
HSPA9	7251.99	0.563977	0.147775	3.81646	0.000135383	0.00155429	9150.65	6006.56	129.222	84.8225
SV2A	1889.56	-0.54743	0.143468	-3.8157	0.000135796	0.00155649	1561.8	2344.69	16.9983	25.5192
GTF2E1	389.371	0.525628	0.13775	3.81582	0.000135731	0.00155649	458.484	310.904	7.48426	5.07518
MRPL52	1430.42	0.416654	0.109219	3.81485	0.000136266	0.00156059	1653.2	1224.58	62.9138	46.6024
RNF216P1	373.999	0.449745	0.117988	3.81178	0.000137968	0.00157879	436.561	314.957	8.89479	6.41715
C3AR1	41.5148	-1.04207	0.273699	-3.80737	0.000140454	0.00160592	16.2368	53.0852	0.411198	1.34439
CLK3	998.788	0.534875	0.140492	3.80716	0.000140569	0.00160593	1200.15	807.526	21.5994	14.5333
METTL3	742.253	0.656682	0.172596	3.80473	0.000141956	0.00162046	1017.37	613.612	24.9111	15.0249
PLCD1	187.853	-0.891041	0.234243	-3.80392	0.000142424	0.00162447	111.66	245.841	1.72761	3.80366
FOXN3	610.545	-0.57426	0.151004	-3.80294	0.000142987	0.00162862	451.929	695.435	2.76511	4.25498
ANKEF1	196.532	-0.604995	0.159088	-3.80288	0.000143021	0.00162862	155.602	246.313	1.96428	3.1094
HEXIM2	140.584	-0.650224	0.171003	-3.80242	0.000143291	0.00163037	99.3222	163.83	1.82062	3.00308
TMBIM1	2551.14	0.408329	0.107416	3.80138	0.000143895	0.00163592	2831.12	2109.93	59.6723	44.4715
AGL	556.849	-0.545523	0.143534	-3.80066	0.000144313	0.00163934	449.695	675.089	2.70958	4.06766
GMPPB	643.691	0.665976	0.175258	3.79997	0.000144715	0.00164257	888.85	531.065	26.0707	15.5766
KBTBD2	1485.29	0.471966	0.124212	3.79966	0.000144892	0.00164325	1703.74	1207.62	22.7366	16.1158
PDCD11	1925.56	0.628168	0.16534	3.79924	0.000145141	0.0016434	2605.83	1614.17	20.1085	12.4561
ZC3H6	195.279	-0.614437	0.161724	-3.7993	0.000145106	0.0016434	141.501	226.312	0.60714	0.971041
ELK4	1046.26	-0.424624	0.111816	-3.79752	0.000146149	0.00165348	893.408	1213.69	3.73369	5.07219
NAA20	1301.81	0.431048	0.113518	3.79719	0.000146344	0.00165435	1493.5	1094.23	55.4718	40.6422
TNS1	1217.94	-0.662023	0.174435	-3.79525	0.000147497	0.00166604	976.905	1628.86	4.7068	7.84796
ZBTB39	172.074	-0.645652	0.170151	-3.79457	0.000147898	0.00166922	139.46	228.572	1.10688	1.81416
KRT7	529.843	-0.638125	0.168204	-3.79375	0.000148392	0.00167345	393.755	642.752	11.4542	18.6974
LOC652276	60.9116	0.873873	0.23039	3.79301	0.000148831	0.00167702	86.4805	40.4967	1.57763	0.738766
WDR19	566.011	-0.468436	0.123506	-3.79282	0.000148949	0.00167702	474.335	667.51	5.1957	7.31167
CSNK1E	16.4844	1.06836	0.281797	3.79124	0.000149898	0.00168635	26.322	7.17857	0.450783	0.122938
HERC2P9	170.236	0.692577	0.182774	3.78925	0.000151103	0.00169855	208.943	121.21	1.75515	1.01818
SAMD1	393.018	-0.545703	0.144057	-3.78811	0.000151797	0.00170498	339.669	509.093	12.9463	19.4037
PTP4A2	5653.39	0.440945	0.116485	3.78543	0.000153445	0.0017221	6551.92	4760.91	82.5627	59.9936
POLR3E	808.054	0.651679	0.172219	3.78402	0.000154314	0.00172935	1059.96	641.498	14.0657	8.5127
MORF4L2	7788.25	0.495777	0.13102	3.78398	0.000154338	0.00172935	8812.03	6125.11	197.953	137.594
PSMD2	17233.1	0.427616	0.113015	3.78371	0.000154505	0.00172984	21101.5	15493.8	330.093	242.372
PLCD4	184.923	-0.821542	0.217178	-3.7828	0.000155075	0.00173344	122.364	244.393	1.87157	3.73804
KIAA2026	500.572	-0.528618	0.139742	-3.78282	0.000155059	0.00173344	409.731	605.709	2.81593	4.16282
NPAT	351.412	-0.729675	0.19297	-3.78128	0.000156024	0.00174127	268.269	479.355	2.23718	3.99749
BBS10	451.337	-0.632335	0.167224	-3.78135	0.000155978	0.00174127	333.771	542.305	4.6121	7.49366
CSRP1	4289	0.600842	0.158911	3.781	0.000156199	0.00174184	5666.65	3597.38	120.722	76.6387
CACYBP	2712.63	0.549089	0.145343	3.77788	0.00015817	0.00176241	3335.5	2216.39	49.8166	33.1025
LOC100126784	370.536	0.626198	0.165797	3.7769	0.000158795	0.00176797	456.483	283.018	6.04459	3.74762
SLC25A33	164.858	0.82254	0.217819	3.77626	0.000159204	0.0017697	213.652	106.828	7.24025	3.62018
POLR1E	662.135	0.676432	0.179122	3.77636	0.000159134	0.0017697	927	547.932	23.3926	13.8269
PSAT1	959.407	-0.674774	0.178762	-3.77471	0.000160192	0.00177928	827.577	1396.51	18.1621	30.648
SYT1	1782.33	-0.65379	0.173227	-3.77418	0.000160534	0.00178166	1218.36	2019.56	11.3237	18.7703
LYSMD1	129.65	-0.666859	0.176736	-3.77319	0.000161175	0.00178736	98.5415	165.059	1.94531	3.25843
RAB35	1625.53	0.425373	0.112786	3.7715	0.000162269	0.00179807	1915.31	1408.61	32.1996	23.6811
CDC16	1871.47	0.36432	0.0966108	3.771	0.000162592	0.00180021	2089.09	1610.97	45.1077	34.7841
REEP4	1282.44	0.782752	0.207591	3.77064	0.000162828	0.00180141	1728.32	909.181	50.5136	26.5726
CDK6	1052.41	-0.740664	0.196534	-3.76863	0.000164143	0.00181452	803.591	1454.74	3.3826	6.12354
TMA16	701.018	0.527744	0.140091	3.76715	0.000165123	0.00182391	863.435	584.596	22.2884	15.0905
EIF5A	16935.9	0.416665	0.110625	3.76647	0.000165569	0.0018266	20486.9	15170.6	557.931	413.148
HTATSF1P2	283.475	-0.549526	0.145903	-3.76639	0.000165627	0.0018266	234.254	353.385	2.51257	3.79036
IPO5P1	131.533	-0.732955	0.194876	-3.76114	0.000169138	0.00186385	95.3735	171.274	0.856985	1.53899
CCDC71	370.327	-0.71558	0.190354	-3.75922	0.000170446	0.00187679	282.577	497.432	7.72104	13.5917
TMEM200A	572.98	0.521162	0.138652	3.75876	0.000170756	0.00187872	667.801	454.354	5.91259	4.02277
SPRED1	1658.84	-0.390853	0.104037	-3.75688	0.000172042	0.00189139	1392.62	1844	9.50373	12.584
DOHH	486.367	0.742815	0.197734	3.75665	0.000172204	0.00189168	657.902	361.999	15.8122	8.70037
NREP	1162.37	-0.766931	0.204205	-3.7557	0.000172859	0.00189738	843.805	1575.84	12.2586	22.8934
TFAP4	97.5865	-0.847868	0.22581	-3.75479	0.000173484	0.00190148	73.895	151.438	1.70962	3.50364
ITGA2	2819.17	-0.692838	0.184522	-3.75477	0.000173504	0.00190148	1961.12	3381.48	12.2751	21.1655
UNKL	643.079	0.549489	0.146363	3.7543	0.000173829	0.00190355	817.857	543.086	6.4788	4.30216
ANP32E	4052.61	0.627198	0.167237	3.75036	0.000176578	0.0019274	4969.62	3075.74	69.2899	42.8841
CFH	2602.17	-0.636692	0.169748	-3.7508	0.000176275	0.0019274	1905.63	3108.35	21.5654	35.1763
CLPTM1L	2879.12	0.339226	0.0904555	3.7502	0.000176695	0.0019274	3297.89	2590.93	42.0825	33.0614
PJA2	2605.46	-0.419827	0.11194	-3.75045	0.000176517	0.0019274	2187.7	2962.47	22.2457	30.124
REXO4	719.632	0.516391	0.137691	3.75036	0.000176579	0.0019274	866.955	591.703	17.2245	11.7558
NVL	437.85	0.487675	0.13007	3.74934	0.000177301	0.0019325	520.913	364.372	8.57974	6.0014
ESM1	239.775	1.04108	0.277811	3.74745	0.000178644	0.00194562	524.678	80.241	12.4352	1.90176
SIAH1	117.429	-0.71896	0.191921	-3.74612	0.00017959	0.00195289	82.1385	145.995	1.62864	2.8948
ZBTB26	105.914	-0.739811	0.197483	-3.74621	0.000179528	0.00195289	78.181	141.683	1.73344	3.14142
USP12	1296.12	0.574796	0.153581	3.74263	0.000182105	0.0019787	1531.78	994.768	16.8419	10.9375
MAST4	1392.5	-0.570484	0.152504	-3.74078	0.00018345	0.00199177	1084.49	1663.69	4.53226	6.95284
CDCA8	2275.7	0.891352	0.238343	3.73979	0.000184176	0.00199809	3243.92	1465.59	64.605	29.1883
UFM1	1588.58	0.571351	0.152795	3.73932	0.000184518	0.00200025	1803.69	1174.6	25.2336	16.4326
IQCB1	297.243	0.642773	0.171941	3.73833	0.000185249	0.00200594	371.537	226.507	7.09137	4.32324
CASD1	411.956	-0.564317	0.150959	-3.73822	0.000185329	0.00200594	319.975	488.344	4.08407	6.23309
OXTR	813.858	0.839361	0.224554	3.73791	0.000185556	0.00200684	1284.76	629.655	14.5892	7.15013
FCHSD2	861.564	-0.427293	0.114349	-3.73673	0.000186426	0.00201469	721.018	982.406	7.95055	10.8328
LINC00847	173.116	-0.734533	0.19662	-3.73579	0.000187127	0.00202071	118.912	214.979	2.82775	5.11225
PXDN	17037.7	-0.493397	0.132085	-3.73545	0.000187381	0.00202183	14616.8	21000.1	105.663	151.807
MBOAT1	53.6105	-0.883282	0.236471	-3.73526	0.00018752	0.00202183	35.7333	77.7087	0.40972	0.891014
DOPEY1	192.74	-0.758409	0.203115	-3.7339	0.000188541	0.00203128	138.066	255.173	0.852119	1.57489
ZWILCH	1650.25	0.620831	0.166299	3.73322	0.000189044	0.00203513	2117.93	1318.38	31.9014	19.8582
TOMM40	1923.74	0.677594	0.181562	3.73203	0.000189941	0.00204321	2604.51	1534.32	71.5598	42.1559
LSM12	347.615	-0.518699	0.139003	-3.73158	0.000190285	0.00204535	292.977	429.913	5.83955	8.56892
TRPC4	61.1884	0.873815	0.234288	3.72967	0.000191731	0.00205772	92.185	43.0312	1.32255	0.617356
NINJ1	1867.65	-0.650523	0.174411	-3.72982	0.000191618	0.00205772	1245.08	2060.69	48.122	79.6456
ACACB	88.7674	-0.733989	0.196813	-3.72937	0.000191958	0.00205859	72.1334	129.494	0.386135	0.693187
NAV3	907.483	0.601631	0.161356	3.72859	0.000192551	0.00206233	1203.22	762.472	6.06271	3.84189
TBCC	387.232	-0.591633	0.158677	-3.72853	0.000192602	0.00206233	291.134	454.964	8.7306	13.6435
TEP1	577.272	-0.471061	0.126361	-3.72789	0.000193089	0.00206421	476.495	671.834	2.20605	3.11042
C15orf39	574.942	-0.72592	0.194736	-3.72772	0.00019322	0.00206421	426.133	760.444	4.76577	8.50462
PRR14L	558.774	-0.713896	0.191497	-3.72798	0.000193017	0.00206421	439.271	773.44	2.00855	3.53652
ADCK3	250.328	-0.614951	0.165004	-3.72688	0.000193863	0.00206792	178.036	284.692	3.01459	4.82054
ZNF345	17.3328	-1.06057	0.284562	-3.72704	0.000193744	0.00206792	6.54538	26.9675	0.0823964	0.33948
PCBD2	264.86	0.612737	0.164442	3.72615	0.000194429	0.00207237	315.834	197.79	6.57575	4.11803
DPP9	3582.28	0.631722	0.169622	3.7243	0.000195855	0.00208599	4643.35	2859.52	53.8395	33.1561
HSF1	1531.67	0.461249	0.123927	3.72193	0.000197705	0.00210409	1832.36	1308.94	42.1566	30.1143
EFHD2	1904.07	0.593654	0.159547	3.72086	0.000198544	0.00210999	2430.89	1550.95	49.7538	31.7438
SNX24	499.702	0.566819	0.152336	3.72084	0.000198561	0.00210999	589.863	385.862	13.6661	8.93974
ANKRD39	174.976	0.620236	0.166714	3.72037	0.000198935	0.00211236	222.685	138.635	12.2775	7.64353
PODXL	1184.56	0.648287	0.174321	3.71892	0.000200075	0.00212286	1517.06	919.173	12.5518	7.60507
CELF1	1826.49	-0.630565	0.169627	-3.71735	0.000201323	0.00213448	1477.05	2395.12	8.05037	13.0541
TLDC1	1155.66	0.406695	0.109449	3.71584	0.000202526	0.00214561	1368.27	1020.68	13.4652	10.0446
FBXL17	670.495	-0.419339	0.112871	-3.71522	0.000203027	0.00214929	555.527	751.83	5.28931	7.15836
UBC	13111.9	-0.701602	0.188871	-3.71471	0.000203435	0.00215198	10173.9	17715.8	194.861	339.311
DPH2	640.463	0.510411	0.137439	3.71374	0.000204221	0.00215866	779.563	534.845	15.4572	10.6049
BPHL	235.347	-0.539333	0.14526	-3.71288	0.000204913	0.00216434	186.747	279.433	4.1443	6.20119
GLRX5	978.183	0.51489	0.138749	3.71093	0.000206496	0.00217942	1150.54	786.372	48.6453	33.2482
FAM198B	136.213	-1.0087	0.271839	-3.71066	0.000206723	0.00218017	56.7791	170.55	0.548733	1.64826
OBSCN	172.723	-0.776959	0.209431	-3.70985	0.000207379	0.00218545	125.811	238.329	0.217583	0.412176
NGDN	464.633	0.456744	0.123149	3.70886	0.000208196	0.00219241	545.834	391.306	17.018	12.2001
ERP44	977.492	0.47666	0.128528	3.70859	0.000208413	0.00219303	1144.45	807.825	11.6493	8.22282
MRPS25	728.925	0.446787	0.120538	3.7066	0.000210062	0.00220873	880.851	636.384	9.55133	6.90051
NGF	324.564	-0.703138	0.189853	-3.70358	0.000212575	0.00222885	236.764	413.519	11.1747	19.5172
GID4	291.678	-0.556589	0.150286	-3.70354	0.000212611	0.00222885	241.524	366.145	2.82561	4.28356
FMNL1	731.918	0.680063	0.183598	3.70408	0.000212156	0.00222885	921.365	540.106	11.5166	6.75106
ELF2	443.578	-0.494665	0.133566	-3.70354	0.000212613	0.00222885	372.985	537.164	5.18727	7.47058
ASAP3	301.199	-0.671758	0.181478	-3.70159	0.000214254	0.00224437	223.569	377.87	2.66594	4.50591
NDC80	1887.02	0.83091	0.224513	3.70095	0.000214794	0.00224667	2477.57	1216.12	56.476	27.7213
MANBA	746.885	-0.535579	0.144713	-3.70097	0.000214781	0.00224667	547.317	816.098	8.18422	12.2034
STAG2	1451.12	-0.532348	0.143971	-3.69759	0.000217652	0.00227486	1177.49	1748.5	8.82106	13.0987
ST8SIA5	144.854	-0.915975	0.247738	-3.69736	0.000217855	0.00227529	81.5846	191.783	1.43034	3.36234
ETV4	483.558	0.661653	0.178994	3.6965	0.00021859	0.00228126	645.048	385.751	11.5671	6.91731
BIRC5	5128.69	0.733753	0.198515	3.69621	0.000218842	0.00228193	6701.65	3711.31	122.89	68.0552
PPP1R3B	309.032	-0.791064	0.21403	-3.69605	0.00021898	0.00228193	196.61	381.042	1.66142	3.21994
AKIRIN1	1733.88	0.559498	0.151389	3.69575	0.000219237	0.0022829	2022.51	1329.79	36.7335	24.152
RAB1A	3843.77	0.433824	0.117402	3.69519	0.00021972	0.00228623	4327.64	3160.19	81.0683	59.1988
STARD4-AS1	108.93	-0.822645	0.222663	-3.69457	0.00022026	0.00229015	81.9143	164.419	0.734049	1.47339
TXNDC12	1624.47	0.464661	0.125778	3.69429	0.000220506	0.002291	1954.68	1392.7	22.2476	15.8513
CLTB	729.079	0.473972	0.128349	3.69285	0.000221755	0.00230227	891.505	629.85	24.9796	17.6481
RIC8A	3043.76	0.421136	0.114061	3.69219	0.000222331	0.00230654	3632.64	2678.88	47.5427	35.0602
TRAK1	1558.89	0.351685	0.0952845	3.6909	0.000223463	0.00231657	1809.11	1407.65	8.97585	6.98403
NELFE	1749.25	0.331246	0.0897593	3.69038	0.000223917	0.00231955	1930.16	1525.37	10.2032	8.0634
ZNF593	249.795	0.522761	0.141706	3.68905	0.000225092	0.00233	303.801	205.944	23.1762	15.7109
CUL4A	2436.3	0.43851	0.118928	3.6872	0.000226731	0.00234481	2867.16	2085.66	31.5876	22.9778
CARHSP1	1805.21	-0.443403	0.120259	-3.68706	0.000226857	0.00234481	1596.69	2202.98	21.245	29.3122
RXRA	1436.23	-0.429227	0.116612	-3.68081	0.000232491	0.00240126	1217.3	1661.12	8.24478	11.2508
F2R	2963.01	-0.540486	0.146887	-3.6796	0.000233597	0.00241091	2432.74	3639.89	31.6132	47.3
SRGAP2	1743.68	0.527499	0.143378	3.67907	0.000234083	0.00241414	2066.18	1396.23	11.8236	7.98983
BRWD1	772.667	-0.500843	0.136171	-3.67805	0.000235023	0.00242206	624.652	904.229	1.5556	2.25184
BRK1	2361.2	-0.612717	0.166701	-3.67554	0.00023735	0.00244423	1845.78	2948.1	77.7087	124.117
PPP1R3C	389.545	-0.934981	0.254408	-3.67513	0.000237731	0.00244635	205.499	504.564	3.95427	9.70898
DCUN1D5	868.596	0.553147	0.150559	3.67395	0.000238831	0.00245469	1086.72	718.631	4.2259	2.79452
ABCE1	3130.83	0.583794	0.158906	3.67383	0.000238942	0.00245469	4108	2642.1	48.4953	31.1902
SERPINE1	28539.8	0.805824	0.21935	3.6737	0.000239067	0.00245469	42641.8	21662.7	661.824	336.217
CEP57L1	351.598	0.512152	0.139424	3.67335	0.000239391	0.00245621	439.483	301.302	7.00774	4.80439
LRRC48	34.9628	-0.904892	0.246383	-3.6727	0.000240001	0.00246067	22.8903	52.5242	0.438249	1.00561
EPB41	567.762	-0.514211	0.140063	-3.67128	0.000241343	0.00247262	477.31	698.221	3.75586	5.49417
GSPT1	4960.14	0.600358	0.163646	3.66863	0.000243851	0.00249649	6188.42	3918.5	39.4124	24.9559
ZDHHC6	1525.62	0.500709	0.136537	3.66721	0.000245209	0.00250856	1814.34	1254.25	40.3726	27.9094
GPATCH4	930.601	0.731108	0.199457	3.66549	0.000246865	0.00252181	1289.49	715.349	29.6256	16.4349
USP16	1229.36	0.44557	0.121553	3.66565	0.000246714	0.00252181	1383.76	1001.1	22.5661	16.3258
RPS19BP1	1178.44	0.433427	0.118252	3.66527	0.000247073	0.00252209	1356.85	990.766	65.9904	48.186
FERMT2	1891.45	0.416652	0.113689	3.66483	0.000247503	0.00252463	2312.64	1711.7	33.2751	24.6286
KIF18B	1502.61	0.850831	0.232396	3.66113	0.000251104	0.00255806	2135.68	1015.37	24.6535	11.721
LAMA4	5832.81	-0.689981	0.188463	-3.66109	0.000251145	0.00255806	4207.92	7263.27	27.5322	47.5233
OSBP2	182.397	0.787999	0.215368	3.65884	0.000253356	0.0025787	240.398	124.183	2.27706	1.17627
EIF2B1	1080.9	0.340983	0.0932091	3.65826	0.000253932	0.00258201	1227.18	962.636	32.4912	25.4869
ZNF619	100.152	-0.752351	0.205665	-3.65814	0.00025405	0.00258201	73.8656	136.102	0.874073	1.61054
C16orf70	327.081	-0.585977	0.16031	-3.65527	0.000256915	0.00260923	264.329	411.434	4.6065	7.17012
MAPKAPK5	475.41	0.506836	0.138686	3.65457	0.000257617	0.00261257	572.678	393.878	12.3761	8.51206
DNMT3A	375.098	-0.504777	0.138115	-3.65475	0.000257435	0.00261257	317.03	460.284	2.77124	4.02347
JTB	1599.98	0.396645	0.108548	3.65411	0.00025808	0.00261537	1841.3	1383.93	57.9184	43.5317
PTRH2	514.563	0.585105	0.160136	3.6538	0.000258387	0.00261659	654.407	419.834	14.5946	9.36314
KPNA4	2878.23	0.503678	0.137899	3.6525	0.000259695	0.00262793	3401.15	2344.33	18.7499	12.9238
CNP	2733.68	-0.377146	0.103269	-3.65208	0.000260129	0.00263042	2350.38	3079.66	22.2843	29.1987
COX19	267.887	0.574667	0.157374	3.6516	0.000260615	0.00263344	324.741	210.451	3.28728	2.13035
RAN	13261	0.514728	0.141014	3.65018	0.000262055	0.00264607	16428.8	11219.1	319.481	218.172
IGSF3	430.426	-0.829416	0.227299	-3.649	0.000263263	0.00265636	299.341	611.334	2.02273	4.13095
PRRC1	1442.33	-0.588946	0.161426	-3.6484	0.000263878	0.00266065	1168.99	1827.42	12.3196	19.2585
C22orf46	349.017	-0.470118	0.128893	-3.64736	0.00026495	0.00266953	293.314	413.754	2.91902	4.11762
DHDDS	649.804	0.452826	0.124245	3.64461	0.000267801	0.00269051	756.994	544.076	11.2618	8.09419
BNIP2	1815.73	0.393038	0.107833	3.64487	0.000267526	0.00269051	2000.71	1508.12	39.3549	29.6654
VASN	1717.25	-0.656737	0.180193	-3.64462	0.000267787	0.00269051	1179.35	1970.34	10.4045	17.3829
SLC27A4	1178.68	0.512872	0.140704	3.64503	0.000267358	0.00269051	1400.47	957.592	21.6953	14.8344
SLC35C1	818.967	0.398008	0.109211	3.64438	0.000268039	0.00269097	935.761	702.108	11.7768	8.83623
GTPBP1	918.87	-0.591782	0.162393	-3.64413	0.000268301	0.00269166	776.933	1216.72	7.62163	11.9359
TPST2	545.432	0.596966	0.163837	3.64365	0.000268797	0.00269394	670.601	425.568	16.0009	10.1543
RNF4	2321.54	0.545547	0.14973	3.64354	0.000268912	0.00269394	2848.79	1893.96	38.39	25.5228
C7orf26	352.923	0.550517	0.151139	3.64245	0.00027006	0.0027035	399.141	264.118	9.0733	6.00396
SLC7A8	265.543	-0.692137	0.190058	-3.64171	0.000270834	0.0027093	153.096	266.352	1.55039	2.69733
EXOC3-AS1	75.2978	-0.844	0.231826	-3.64066	0.000271943	0.00271846	48.9527	102.903	1.82919	3.84512
AHCYL2	359.927	-0.569674	0.156491	-3.64029	0.000272328	0.00272037	261.227	401.327	2.2384	3.43889
WDR78	105.149	-0.720662	0.19803	-3.63916	0.000273528	0.00272962	69.8944	125.44	0.874308	1.56912
CORO1C	10348.1	0.541448	0.148788	3.63905	0.000273645	0.00272962	13629.4	9094.83	158.106	105.504
PRPSAP1	1003.43	0.436517	0.119962	3.63879	0.000273924	0.00273046	1181.11	860.003	24.789	18.0497
RAP1GAP2	558.683	0.465817	0.128072	3.63716	0.000275661	0.00274582	727.435	517.287	5.40533	3.84379
TOMM5	1454.54	0.458973	0.126228	3.63605	0.000276853	0.00275573	1745.4	1248.49	95.4868	68.3019
CYTH3	887.669	0.699312	0.192339	3.63584	0.000277078	0.00275601	1182.31	677.633	13.1043	7.51063
BTN3A3	346.364	-0.790997	0.217642	-3.6344	0.00027863	0.00276948	217.007	423.393	3.57898	6.98282
LINC01605	380.167	0.651142	0.179244	3.63271	0.000280458	0.00278567	513.415	309.528	11.6764	7.03945
GLIPR1	4464.53	0.673819	0.185505	3.63235	0.000280849	0.00278758	6085.86	3584.18	77.1215	45.4197
RNF39	44.2454	-0.948491	0.261169	-3.63172	0.00028154	0.00279019	25.1482	64.4583	0.071743	0.183887
GLTSCR1L	393.152	-0.51628	0.142165	-3.63156	0.000281711	0.00279019	315.219	462.317	2.39549	3.51336
ST3GAL1	1204.48	-0.707459	0.194792	-3.63186	0.000281382	0.00279019	884.96	1558.34	6.2853	11.0679
ZNF740	884.003	-0.477369	0.131549	-3.62882	0.000284717	0.00281797	738.233	1048.56	8.58795	12.198
PCCB	750.035	-0.372858	0.102754	-3.62863	0.000284926	0.00281804	676.84	884.122	17.8628	23.3333
EPB41L4B	45.953	0.942829	0.259883	3.6279	0.000285737	0.00282408	65.5105	25.9619	0.411397	0.163037
DEPDC5	213.995	-0.733493	0.202194	-3.62766	0.000285996	0.00282464	166.047	300.227	1.33178	2.40797
LINC01137	112.986	-0.850161	0.234381	-3.62726	0.000286445	0.00282708	63.2043	135.465	2.1929	4.70005
ATG2B	798.465	-0.559888	0.15439	-3.62646	0.000287336	0.00282731	640.35	975.296	2.85648	4.35061
NR2F2	3545.98	-0.513825	0.141692	-3.62634	0.000287463	0.00282731	2869.99	4201.09	23.2561	34.0423
METTL4	441.339	0.577577	0.159271	3.62637	0.000287432	0.00282731	529.463	342.165	7.10983	4.59472
DKFZP434I0714	34.56	-0.908376	0.250488	-3.62642	0.000287381	0.00282731	21.8473	50.5492	0.360557	0.834239
MRPL13	1005.56	0.416201	0.114772	3.62633	0.000287479	0.00282731	1112.7	823.739	49.6308	36.7421
HTR7P1	179.153	-0.624022	0.172149	-3.62489	0.000289084	0.00283711	134.072	217.18	1.51241	2.44992
RNF10	3395.33	0.411354	0.113469	3.62525	0.000288682	0.00283711	3860.21	2867.62	49.6805	36.9059
RAD21	8607.56	0.536378	0.147971	3.62489	0.000289082	0.00283711	10089	6759.04	133.203	89.2383
TXNDC11	796.29	0.460661	0.127096	3.62453	0.000289492	0.00283913	926.903	662.278	14.2476	10.18
KIF23	3837.55	0.859896	0.237274	3.62405	0.00029002	0.00284232	5500.09	2564.59	73.1433	34.1053
ARHGDIA	11803	0.564145	0.155723	3.62274	0.000291504	0.00285486	14917.1	9751.76	310.055	202.693
HNRNPAB	5133.28	0.67612	0.186657	3.62226	0.000292045	0.00285816	6992.69	4106.25	190.645	111.951
PHF12	688.027	-0.576947	0.159316	-3.6214	0.000293014	0.00286564	550.533	852.164	4.68255	7.24808
CSF1R	141.17	-0.866965	0.239418	-3.62113	0.00029332	0.00286663	80.8784	177.446	0.995607	2.18435
HDGFRP3	1611.27	0.482287	0.133198	3.62084	0.000293654	0.00286789	1913.77	1343.05	38.9283	27.3192
CNRIP1	1127.14	0.42365	0.117027	3.6201	0.000294488	0.00287403	1304.75	959.811	27.9406	20.554
URI1	1029.44	0.4049	0.111868	3.61946	0.000295216	0.00287712	1208.47	902.516	16.755	12.513
WHSC1	6900.01	0.66266	0.183081	3.61949	0.000295183	0.00287712	9171.44	5458.92	26.5903	15.8268
KRTCAP2	859.817	0.404107	0.11168	3.61845	0.000296372	0.00287872	948.052	708.15	85.8108	64.0967
KDM5A	1361.33	-0.648748	0.179277	-3.6187	0.000296083	0.00287872	1070.16	1773.09	4.88964	8.10138
ZCCHC3	360.394	-0.589511	0.1629	-3.61886	0.000295905	0.00287872	274.361	429.272	4.92701	7.70892
STX17	635.67	-0.450791	0.124582	-3.61842	0.000296408	0.00287872	531.006	738.487	3.80579	5.29283
HCCS	827.091	0.475499	0.131397	3.61879	0.000295981	0.00287872	972.573	686.289	20.4383	14.4221
PATL1	1092.09	-0.615728	0.170198	-3.61772	0.000297209	0.00287932	892.785	1431.38	10.7027	17.1594
ANGEL1	286.817	-0.606025	0.167505	-3.61795	0.000296951	0.00287932	228.714	363.715	2.7545	4.38038
POC1A	985.47	0.722827	0.199806	3.61765	0.000297293	0.00287932	1293.29	721.467	28.2449	15.7566
GSAP	340.051	0.5402	0.149302	3.61817	0.000296696	0.00287932	395.405	264.108	6.02175	4.02218
RNF138	670.288	0.517433	0.143056	3.617	0.00029804	0.00288456	823.56	561.13	11.1285	7.58238
ZNF672	362.321	-0.735963	0.203631	-3.6142	0.000301273	0.00291182	271.498	493.158	4.34876	7.89922
POLR2D	881.69	0.510657	0.141286	3.61436	0.000301096	0.00291182	1086.73	744.352	23.1418	15.8509
DHRS7	629.017	0.417675	0.115691	3.61025	0.0003059	0.0029545	736.646	544.456	26.2575	19.407
WRNIP1	1111.7	0.513312	0.14221	3.60954	0.000306743	0.0029606	1330.28	908.728	24.8351	16.9652
SYNGAP1	785.733	-0.715508	0.198302	-3.60817	0.000308361	0.00297416	609.343	1082.85	2.50989	4.46028
NOP56	2653.02	0.594624	0.164819	3.60773	0.000308887	0.00297719	3587.22	2280.39	80.9872	51.4836
FAM214A	445.935	-0.756821	0.209861	-3.6063	0.000310591	0.00299155	276.448	517.901	2.94599	5.51906
KIAA1841	469.796	0.499714	0.138578	3.60602	0.000310928	0.00299274	562.269	388.689	5.04499	3.48753
OTUD6B	537.562	0.467956	0.129782	3.60572	0.000311292	0.00299418	651.615	462.744	9.38389	6.66396
TOMM70A	1291.3	-0.553534	0.153639	-3.60282	0.000314788	0.00302572	1082.53	1640.42	12.2339	18.5387
ZNF304	175.242	-0.650516	0.18068	-3.60038	0.000317754	0.00305214	130.45	216.924	1.39165	2.31416
CHD3	5721.87	-0.453817	0.126088	-3.59922	0.000319171	0.00306365	4903.85	6830.71	31.9296	44.4755
ATL2	1087.91	0.602601	0.167494	3.59775	0.000320987	0.00307897	1356.66	855.397	14.2579	8.98984
NR1D2	1620.34	-0.389441	0.108255	-3.59743	0.000321371	0.00308054	1413.95	1871.54	12.7329	16.8536
NLRX1	315.503	-0.613137	0.170505	-3.596	0.000323144	0.00309541	248.81	397.824	2.89376	4.62684
ALX1	85.3198	-0.757056	0.210541	-3.59577	0.00032343	0.00309604	58.0359	108.284	2.22226	4.14633
SLITRK5	501.906	-0.70657	0.196603	-3.59389	0.000325782	0.00311642	354.45	625.572	3.94715	6.96635
KRT86	25.3666	-0.973216	0.270956	-3.59179	0.000328415	0.00313946	12.7746	36.6009	0.302476	0.866634
AHRR	992.999	-0.737519	0.205419	-3.59032	0.000330275	0.00315508	664.112	1214.95	5.80928	10.6277
PHC1	412.994	-0.574599	0.16006	-3.58989	0.000330815	0.00315808	348.8	539.167	3.33641	5.15735
ANKRD26	390.697	-0.543998	0.151705	-3.58589	0.000335928	0.00320471	325.161	489.143	2.37482	3.57246
GPR162	266.532	-0.691963	0.193015	-3.58503	0.000337042	0.00321315	195.261	339.111	3.8424	6.67312
TENM4	990.326	-0.745811	0.208085	-3.58416	0.000338164	0.00322165	717.051	1322.83	2.62043	4.83422
MTCH1	6237.48	0.37784	0.105427	3.5839	0.000338501	0.00322267	7235.48	5515.53	148.706	113.357
ABCC1	3317.16	-0.503335	0.140456	-3.58358	0.000338917	0.00322443	2790.15	4050.31	10.5235	15.2764
YWHAE	11764.2	-0.517258	0.144382	-3.58256	0.000340241	0.00323483	10105.1	14844.2	134.492	197.565
STIP1	5393.68	0.566058	0.158096	3.58048	0.000342967	0.00325854	6730.68	4388.11	114.752	74.8132
ACOT2	593.528	-0.558179	0.155927	-3.57974	0.000343936	0.00326553	480.381	730.953	10.3905	15.8103
CENPH	690.507	0.520235	0.14534	3.57944	0.000344329	0.00326704	862.423	585.712	30.7408	20.8775
G0S2	3531.56	0.861025	0.240627	3.57825	0.000345902	0.00327974	5215.41	2411.35	268.139	123.974
OTX1	20.948	-1.01193	0.282866	-3.57743	0.000346985	0.00328576	10.1157	34.4203	0.163298	0.555646
UTP15	447.506	0.685824	0.191714	3.57733	0.000347121	0.00328576	576.864	334.601	5.60566	3.25148
TRAM2	7154.62	-0.557884	0.155954	-3.57724	0.000347241	0.00328576	5816.4	8855.86	40.8067	62.1309
SRSF11	3338.85	0.375308	0.104929	3.57678	0.000347857	0.00328937	3770.89	2880.36	66.8691	51.0773
UBE2N	2273.42	0.501207	0.140194	3.57509	0.000350104	0.00330837	2733.5	1886.22	53.0318	36.5939
FTO	921.618	-0.536114	0.149969	-3.57484	0.000350442	0.00330934	784.572	1171.05	9.05046	13.5087
GPBP1	1484.23	0.465422	0.130215	3.57424	0.000351242	0.00331465	1648.35	1172.31	17.5733	12.4982
RRP15	573.16	0.559104	0.156461	3.57345	0.000352311	0.00332251	728.22	477.882	4.63963	3.04468
C20orf24	284.872	0.736982	0.206388	3.57086	0.000355808	0.00335323	385.426	210.776	15.2296	8.32852
LBR	3276.69	0.60666	0.169909	3.57049	0.000356312	0.00335571	4113.52	2581.92	51.2616	32.1752
BRPF3	883.255	-0.606413	0.169851	-3.57027	0.000356618	0.00335633	732.312	1165.28	6.01978	9.57885
ZNF557	95.1014	-0.788209	0.220784	-3.57005	0.000356911	0.00335684	62.8986	122.508	0.518937	1.01074
LRRC40	682.671	0.552055	0.154653	3.56965	0.000357463	0.00335977	822.937	543.585	13.835	9.13859
MROH6	60.8102	0.994794	0.278748	3.5688	0.000358626	0.00336844	93.1366	29.8354	0.709422	0.227256
CCDC28B	98.1868	-0.869486	0.243675	-3.56822	0.00035942	0.00336911	64.303	141.835	1.91212	4.2176
ACTA2	592.503	-0.735412	0.206095	-3.56832	0.000359276	0.00336911	382.231	698.975	10.2239	18.6962
BOK	558.77	0.469702	0.131631	3.56831	0.000359285	0.00336911	674.06	477.718	12.6079	8.93541
CACFD1	185.772	-0.779591	0.218565	-3.56686	0.000361288	0.00338435	115.667	223.842	1.98845	3.8481
ANXA7	4052.29	0.370057	0.103797	3.56521	0.000363571	0.00340346	4507.88	3456.91	101.265	77.6558
FBF1	282.955	0.66314	0.186016	3.56495	0.000363923	0.00340448	371.223	220.272	4.75905	2.82387
DNAH14	169.379	0.622038	0.174578	3.56309	0.000366516	0.00342416	202.022	124.821	0.691858	0.42747
VGLL3	1141.7	0.719796	0.202008	3.56321	0.000366347	0.00342416	1645.13	919.294	7.83486	4.3781
GOSR1	1106.34	0.439322	0.123325	3.5623	0.000367617	0.00343215	1274.77	925.747	12.0517	8.75199
MIS18BP1	1616.97	0.664611	0.186615	3.5614	0.000368883	0.00344168	2062.33	1221.62	21.3747	12.6613
TRIM5	680.182	-0.609337	0.17111	-3.56108	0.000369332	0.00344357	541.516	864.931	7.32734	11.7035
CASZ1	21.0076	1.00425	0.282048	3.56056	0.000370067	0.00344813	35.6563	10.9157	0.206306	0.0631579
TBC1D31	244.006	0.667725	0.187558	3.56011	0.000370704	0.00345176	310.525	183.528	4.38763	2.59319
RPF2	674.046	0.519985	0.146153	3.55781	0.000373965	0.00347981	811.562	550.975	10.8832	7.3887
PPP1R3D	109.856	-0.834392	0.2346	-3.55665	0.000375608	0.00349278	71.6765	149.151	1.02387	2.13057
KIF4A	2319.72	0.829416	0.233256	3.55581	0.00037681	0.00350163	3206.95	1549.52	35.2761	17.0446
ME2	1032.87	0.568913	0.160032	3.55499	0.000377987	0.00351024	1274.32	828.306	13.6504	8.87275
SNX12	1561.1	-0.509233	0.143264	-3.5545	0.000378704	0.00351456	1310.86	1912.59	25.4515	37.1346
ZDHHC16	1702.57	0.328443	0.0924291	3.55346	0.000380203	0.00352613	1895.53	1499.76	45.1413	35.7163
USP14	3144.66	0.517763	0.145798	3.55125	0.000383413	0.00355356	3786.5	2574.71	45.1087	30.6726
ZNF616	103.592	-0.66784	0.188137	-3.54975	0.000385593	0.00357139	82.5901	139.512	1.342	2.26693
TXNRD1	15133.6	0.591849	0.166754	3.54923	0.000386362	0.00357615	19325.7	12294.2	207.555	132.038
REXO2	2217.68	0.384086	0.108231	3.54876	0.000387047	0.00357662	2531.29	1920.17	108.039	81.9556
COL5A2	2279.25	-0.677565	0.190935	-3.54867	0.00038718	0.00357662	1738.22	2977.04	12.4185	21.2691
PRICKLE4	137.633	-0.774868	0.218348	-3.54878	0.000387016	0.00357662	94.2837	181.345	2.83599	5.45473
ENOPH1	1234.64	0.45608	0.128529	3.54845	0.000387506	0.00357727	1515.19	1085.09	34.2391	24.5201
SFPQ	7660.79	0.691592	0.194938	3.54775	0.00038853	0.00358076	10016.1	5761.16	161.375	92.8207
CHUK	1189.71	0.462287	0.130312	3.54755	0.000388839	0.00358076	1392.41	992.32	19.5628	13.9416
LOC613037	19.1309	0.994368	0.280301	3.5475	0.000388907	0.00358076	28.5446	8.69759	0.409047	0.124637
TIMM21	565.049	0.621015	0.175047	3.54771	0.000388592	0.00358076	712.859	441.132	23.0078	14.2377
SVIL	3774.87	-0.541016	0.152594	-3.54547	0.00039192	0.00360613	3026.47	4543.13	17.5315	26.3172
PSMD3	3900.16	0.39377	0.111072	3.54518	0.000392347	0.00360769	4734.09	3563.38	107.173	80.6697
MFSD12	884.97	0.447258	0.126166	3.54499	0.000392625	0.00360787	1065.08	767.873	24.6991	17.8069
PDE8A	541.859	0.513484	0.144857	3.54477	0.000392953	0.00360852	664.222	453.659	8.03273	5.48629
CCDC85B	2980.62	0.576371	0.162606	3.54458	0.000393245	0.00360883	3620.56	2335.76	145.5	93.8675
LOC284454	118.139	-0.919045	0.259317	-3.5441	0.000393955	0.00361298	76.7837	186.704	2.14295	5.21072
CBX8	80.981	-0.698805	0.19723	-3.5431	0.000395458	0.00362439	64.264	112.057	2.05805	3.5886
ANOS1	498.064	-0.665603	0.187907	-3.54219	0.000396823	0.00363452	379.456	642.494	2.97546	5.03804
EEF2K	752.174	-0.628247	0.177388	-3.54166	0.000397617	0.00363941	619.193	1007.24	4.13607	6.72817
ZFAND1	533.087	0.470255	0.132793	3.54125	0.000398232	0.00364028	614.277	435.073	13.2751	9.4023
FUBP3	1933.05	0.428557	0.121017	3.54129	0.000398182	0.00364028	2199.87	1611.16	34.5001	25.2674
ZNF791	171.527	-0.591074	0.166938	-3.54068	0.000399093	0.00364576	137.231	215.992	2.72319	4.28612
SGTA	2188.1	0.395784	0.111793	3.54034	0.00039961	0.00364811	2587.75	1944.9	55.3438	41.5952
ZFYVE1	666.974	-0.480383	0.135795	-3.53755	0.000403852	0.00368442	505.345	720.021	5.49043	7.82282
PBX2	1361.13	-0.630532	0.178256	-3.53724	0.000404337	0.00368645	1036.76	1692.6	2.28399	3.72881
KLHL11	208.34	-0.582754	0.164861	-3.53482	0.000408055	0.00371135	161.559	252.103	1.07961	1.68468
PARD6B	55.6129	-0.943362	0.266881	-3.53477	0.000408129	0.00371135	27.1251	72.9452	0.291003	0.782568
DDIT4L	353.024	-0.892075	0.25234	-3.53521	0.000407449	0.00371135	164.328	386.897	3.08883	7.27239
STARD3NL	1550.77	0.463689	0.131173	3.53495	0.000407857	0.00371135	1768.84	1259.05	50.2156	35.7434
MBTD1	315.559	-0.595784	0.168565	-3.53444	0.000408635	0.00371354	241.919	381.597	2.22548	3.51042
HMMR	1947.68	0.775547	0.219518	3.53296	0.000410938	0.00373204	2531.85	1315.06	39.896	20.7223
AKAP12	5144.17	0.668562	0.189314	3.53149	0.000413227	0.0037504	7333.89	4324.13	41.3041	24.3533
SLC22A18	116.153	-0.767859	0.217483	-3.53067	0.000414515	0.00375965	72.5957	138.694	1.10592	2.11287
CENPC	265.735	-0.647732	0.18359	-3.52815	0.000418475	0.00379311	216.149	358.437	3.19548	5.29901
TIMM17A	1624.25	0.465836	0.132051	3.52771	0.000419176	0.00379701	1947.36	1383.49	58.1163	41.2884
LAYN	1036.49	0.550705	0.156145	3.52689	0.00042047	0.00380626	1315.06	868.258	23.4882	15.5079
FAM222B	375.769	-0.570177	0.161711	-3.52591	0.000422033	0.00381794	299.887	461.627	3.06958	4.72512
APOPT1	517.006	0.517963	0.146923	3.52542	0.000422818	0.00382257	593.613	403.782	9.45019	6.42812
RAB21	1040.39	0.388504	0.110233	3.52439	0.000424454	0.00383488	1174.81	887.611	22.1414	16.7286
PDHB	1754.85	-0.423073	0.120063	-3.52375	0.000425492	0.00384178	1464.8	1992.4	45.0454	61.2701
SKIL	1130.9	-0.738768	0.209759	-3.52198	0.000428344	0.00386504	770.291	1418.04	5.24227	9.65059
PRDM2	526.329	0.49416	0.140345	3.52104	0.000429861	0.00387622	623.144	432.098	3.21947	2.23243
GPNMB	9209.39	-0.481411	0.136776	-3.51971	0.000432024	0.00389322	6678.53	9527.91	119.544	170.546
SAMHD1	574.903	-0.711359	0.202122	-3.51945	0.00043245	0.00389456	383.757	684.034	5.95799	10.6199
ZNF445	377.262	-0.602939	0.171351	-3.51873	0.000433618	0.00390256	307.108	487.419	1.48357	2.35461
NR1H3	112.266	-0.711074	0.202125	-3.518	0.000434812	0.00391079	79.4177	141.701	1.69849	3.03054
SNHG4	73.6872	-0.787811	0.223989	-3.51719	0.000436149	0.0039203	55.1017	107.923	1.76463	3.45622
TNFAIP8L1	990.272	0.608057	0.172909	3.51663	0.000437057	0.00392594	1231.82	770.685	15.4011	9.63561
OSBPL7	262.354	-0.767867	0.218365	-3.51644	0.000437378	0.0039263	189.336	360.933	2.56404	4.88784
WDR62	1093.43	0.825247	0.234754	3.51537	0.000439134	0.00393954	1516.54	732.917	15.824	7.64744
SLC7A5	4046.08	0.642858	0.182906	3.51469	0.000440275	0.00394725	5083.65	3072.47	55.4026	33.4843
TNS2	1695.24	-0.75466	0.214755	-3.51405	0.000441331	0.00395418	1163.55	2184.87	11.0806	20.8067
DLGAP5	3839.86	0.742083	0.211307	3.51187	0.000444963	0.00398417	5165.9	2796.75	82.9333	44.899
BCL7B	851.135	0.383439	0.109205	3.51119	0.000446102	0.00399182	998.48	757.514	23.9396	18.1622
PAQR8	294.342	-0.644453	0.18356	-3.51086	0.000446661	0.00399427	230.476	381.185	2.40839	3.98326
PANK1	174.752	-0.609376	0.173674	-3.50874	0.000450232	0.00402128	130.919	209.368	0.9039	1.44553
ZFP14	34.0488	-0.907053	0.258514	-3.50873	0.000450257	0.00402128	21.048	50.6429	0.13902	0.334493
SNAPC3	805.168	0.390817	0.111419	3.50762	0.000452134	0.00403547	902.719	681.332	14.4407	10.8992
TCEB1	1751.2	0.423598	0.120774	3.50735	0.000452589	0.00403696	1998.42	1468.99	42.4647	31.2147
RAB31	1890.75	-0.443342	0.126431	-3.50659	0.000453894	0.00404602	1438.36	1989.24	17.8303	24.6591
TCEANC	27.1443	-0.971525	0.277134	-3.50562	0.000455547	0.00405817	12.2395	37.5951	0.177864	0.546333
TBL2	957.517	0.418952	0.11952	3.5053	0.00045609	0.00406042	1126.98	831.16	18.3604	13.541
RHEBL1	26.1249	-0.9328	0.266148	-3.50482	0.000456924	0.00406526	16.456	41.8426	0.633057	1.60967
DDR2	1789.71	-0.615517	0.175647	-3.50428	0.000457849	0.0040709	1450.36	2334.75	22.1356	35.6333
KBTBD8	92.8605	0.732615	0.209084	3.50393	0.000458445	0.00407362	120.756	66.1656	1.27695	0.699678
RPRD2	1089.14	-0.44536	0.127116	-3.50358	0.000459043	0.00407573	927.996	1285.23	5.58881	7.74021
TP53BP2	1252.72	0.437984	0.125015	3.50345	0.000459265	0.00407573	1487.6	1080.88	15.3794	11.1746
MRPL15	1630.03	0.435527	0.124327	3.50308	0.000459918	0.00407893	1862.47	1355.49	52.7226	38.3711
CACTIN	500.128	0.552383	0.157754	3.50155	0.000462553	0.00409734	648.571	427.304	8.86067	5.83776
EID2B	49.998	-0.772097	0.220502	-3.50154	0.000462579	0.00409734	38.3477	73.0533	1.42218	2.70929
CADM1	203.027	-0.841591	0.240375	-3.50116	0.000463237	0.00410057	109.506	235.309	1.23388	2.6514
COPG2	994.016	-0.375157	0.107169	-3.50061	0.0004642	0.0041065	863.606	1131.59	10.6125	13.9056
RAB3A	65.4438	-0.883186	0.252414	-3.49896	0.000467077	0.00412934	37.5836	87.2775	1.23969	2.87885
ZNF581	375.502	-0.665316	0.190187	-3.49822	0.000468373	0.00413557	269.275	456.844	10.8743	18.4491
LINC00476	152.999	-0.634741	0.181447	-3.49822	0.000468371	0.00413557	112.442	184.872	0.607027	0.99805
LYSMD2	132.153	0.684611	0.195734	3.49767	0.000469345	0.00414154	172.001	99.5298	4.54179	2.62815
OPHN1	837.593	-0.49438	0.141428	-3.49563	0.000472946	0.00416806	661.125	953.483	4.34639	6.26841
ATP7A	388.568	-0.621781	0.177872	-3.49567	0.000472865	0.00416806	291.131	472.794	1.69	2.74455
DVL1	3723.48	0.55643	0.159194	3.49529	0.000473553	0.00416816	4670.07	3065.1	79.0758	51.8998
DMRT3	26.7345	-0.95894	0.274347	-3.49536	0.000473424	0.00416816	13.7034	38.9897	0.311222	0.885504
SNHG17	204.108	0.53435	0.153033	3.49173	0.000479897	0.00422135	263.151	175.963	9.99138	6.68099
RSBN1L	255.469	-0.562724	0.161243	-3.48992	0.000483166	0.00424743	209.641	320.839	3.22342	4.9332
MRPL9	968.043	0.363048	0.104041	3.48946	0.000483999	0.00425208	1071.27	825.34	31.4213	24.2079
CAPN7	950.445	0.440147	0.126191	3.48793	0.000486772	0.00427376	1047.67	759.576	11.8752	8.60967
IFRD2	1387.23	0.588989	0.168885	3.4875	0.000487553	0.00427794	1862.33	1185.97	43.7198	27.8416
CSRNP2	910.924	0.484928	0.139105	3.48606	0.000490185	0.00429834	1029.19	719.392	10.837	7.57496
SIRT7	371.89	0.547714	0.157244	3.48321	0.000495445	0.00434173	430.803	284.66	12.3219	8.14193
CHST15	292.259	0.72607	0.208492	3.48247	0.000496802	0.0043509	404.1	222.627	3.0667	1.68951
PRDM4	1243.45	0.337472	0.0969445	3.48108	0.000499394	0.00437086	1379.17	1083.78	16.3085	12.8154
HMGXB4	616.68	-0.577709	0.165965	-3.4809	0.000499732	0.0043711	542.311	841.705	6.31618	9.80317
GAS2L1	898.473	0.468819	0.134709	3.48025	0.000500944	0.00437896	1052.92	745.437	20.2293	14.3217
AHNAK2	5137.77	-0.665423	0.191227	-3.47976	0.000501862	0.00438425	3938.51	6680.4	10.6457	18.057
BMS1P4	101.67	0.671153	0.192897	3.47934	0.000502659	0.00438847	134.685	78.8934	3.40222	1.99288
TM2D3	347.678	-0.569232	0.163629	-3.4788	0.000503658	0.00438897	264.566	408.462	6.06706	9.36692
ALS2CL	71.6708	0.771255	0.221691	3.47897	0.000503346	0.00438897	92.2146	47.6953	0.813541	0.420781
ETV1	2241.27	-0.56841	0.163384	-3.47898	0.000503324	0.00438897	1587.62	2448.31	10.2911	15.8702
ZBED5	682.166	-0.413246	0.118806	-3.47831	0.000504578	0.00438906	573.972	774.992	10.3676	13.9986
HSP90AA1	48277.1	0.52111	0.149806	3.47857	0.000504088	0.00438906	60687	41094.7	737.517	499.416
ROGDI	331.658	-0.638295	0.183508	-3.4783	0.000504608	0.00438906	248.536	410.412	7.06785	11.6713
TRAIP	303.433	0.795332	0.228687	3.47781	0.000505523	0.00439428	416.266	209.182	10.1826	5.11695
CEP68	329.166	-0.570411	0.164165	-3.47462	0.000511573	0.00444411	252.295	389.252	2.13089	3.28763
TDP1	823.06	0.454445	0.130821	3.4738	0.000513144	0.00445499	1019.32	730.499	13.4686	9.65235
HN1L	3192.39	0.441343	0.127076	3.47306	0.000514566	0.00446457	3900.39	2825.15	52.4329	37.9784
ZNF346	254.377	-0.505896	0.145712	-3.4719	0.000516793	0.00448111	219.687	319.887	1.73807	2.5308
CDH23	11.1356	-0.993715	0.286276	-3.47118	0.000518173	0.0044903	3.29291	16.2515	0.0118864	0.058663
WDR5	1246.29	0.490733	0.141381	3.47099	0.00051854	0.00449069	1553.16	1079.48	24.1589	16.791
USP37	273.928	-0.670843	0.193301	-3.47045	0.000519582	0.00449694	222.906	380.036	1.37403	2.3426
FAM227A	56.1915	-0.809159	0.233179	-3.47012	0.00052022	0.00449968	35.6482	72.825	0.17033	0.347964
CTBP2	3088.53	0.383948	0.110656	3.46975	0.000520942	0.00450036	3557.87	2697.44	30.6778	23.2587
ZNF23	249.524	0.495236	0.142724	3.46989	0.000520673	0.00450036	293.521	203.414	4.27171	2.96036
SAMD12	169.458	-0.675505	0.194792	-3.46782	0.0005247	0.00452724	123.919	212.594	0.584814	1.0033
MTBP	218.102	0.697352	0.201088	3.46789	0.00052456	0.00452724	283.191	161.046	4.54192	2.58292
NFKB2	1466.07	0.583041	0.168168	3.46702	0.000526265	0.00453794	1766.81	1130.41	22.5163	14.4059
PRKAR1A	6105.52	-0.385735	0.111273	-3.46657	0.000527149	0.00454277	5220.36	6894.97	49.372	65.2098
ADAMTS10	285.992	-0.843657	0.243394	-3.46622	0.000527841	0.00454593	193.821	416.268	2.19895	4.72265
BDH2	696.25	-0.612132	0.176613	-3.46596	0.000528349	0.0045475	472.903	761.275	8.01838	12.9079
CLK2	449.477	-0.740871	0.21391	-3.46348	0.000533243	0.00458681	342.022	632.787	3.88565	7.18898
TGFBR3	114.286	-0.786586	0.227203	-3.46204	0.000536089	0.00459716	76.4633	150.417	0.556562	1.09485
WDR20	778.065	0.445116	0.12856	3.46232	0.000535541	0.00459716	907.979	655.473	7.56555	5.46159
PLK1	4376.09	0.809085	0.2337	3.46207	0.000536043	0.00459716	6125.18	3011.86	136.175	66.9595
ADAMTS5	67.2442	0.822523	0.237579	3.46209	0.000535988	0.00459716	83.7118	40.0198	0.428916	0.20505
CNOT8	904.149	-0.545799	0.157643	-3.46224	0.000535709	0.00459716	715.269	1080.24	11.9116	17.9896
KIRREL	4051.06	-0.360136	0.104031	-3.4618	0.000536581	0.00459856	3737.68	4839.41	23.6642	30.6396
TTC4	94.2857	0.719987	0.208097	3.45987	0.000540438	0.00462595	132.609	73.5747	2.74365	1.52224
SURF6	713.721	0.514382	0.148666	3.45998	0.000540208	0.00462595	871.784	593.378	18.5247	12.6088
CDC123	2042.7	0.402806	0.11656	3.45578	0.000548709	0.00469388	2344.42	1751.49	74.9827	56.0188
SLMO1	130.477	0.68445	0.19813	3.45455	0.00055122	0.0047096	184.678	106.467	4.92645	2.8401
TFEB	125.103	-0.903212	0.261454	-3.45458	0.000551159	0.0047096	71.3521	175.096	1.29166	3.16969
PPIF	3639.57	0.689862	0.199725	3.45407	0.000552203	0.00471451	5022.24	2879.93	113.024	64.8122
TRIM21	324.243	-0.591631	0.171292	-3.45394	0.000552469	0.00471451	221.324	349.379	5.6806	8.96731
DKC1	1948.47	0.648311	0.187793	3.45226	0.000555919	0.00474106	2602.39	1560.35	28.4867	17.0802
C1orf43	4552.28	0.351318	0.101773	3.45197	0.000556516	0.00474326	4778.08	3715.13	85.619	66.5719
UBL4A	1080.36	0.371445	0.107639	3.45085	0.000558826	0.00476005	1268.64	971.264	26.369	20.188
SFTA1P	38.6465	0.920027	0.266706	3.44959	0.000561437	0.00477876	59.5872	23.3739	4.25713	1.66992
RBM42	1638.82	0.475359	0.137807	3.44946	0.000561705	0.00477876	1912.5	1346.21	57.3873	40.3947
GPN1	1199.28	0.378805	0.109839	3.44872	0.000563256	0.00478904	1373.44	1045.58	34.5353	26.291
CAPN12	31.9823	0.906798	0.262958	3.44845	0.000563818	0.00478968	43.935	17.5736	0.695188	0.278068
BZW1	7927.2	0.406004	0.117739	3.44835	0.000564016	0.00478968	8919.06	6644.93	120.356	89.6686
ESF1	490.578	0.599226	0.173835	3.4471	0.000566641	0.00480906	604.518	380.756	9.17253	5.77733
C11orf95	1018.57	0.456812	0.13258	3.44557	0.000569861	0.00483346	1152.54	823.493	10.2226	7.30411
SFT2D1	865.899	0.418033	0.121346	3.44497	0.000571121	0.00484066	979.386	722.618	43.4108	32.0297
USP27X	92.9546	-0.757962	0.220028	-3.44484	0.000571402	0.00484066	58.4939	111.791	1.07341	2.05146
PLSCR4	353.278	-0.753343	0.218699	-3.44466	0.000571777	0.00484091	224.926	425.783	3.04352	5.76134
LDB2	41.6809	-0.813064	0.236064	-3.44426	0.000572632	0.00484258	26.46	54.8342	0.393763	0.816011
FNIP1	655.45	-0.654255	0.189956	-3.44424	0.000572667	0.00484258	470.411	790.028	3.52136	5.91392
REV3L	947.158	-0.492705	0.143059	-3.44408	0.000573016	0.00484261	754.45	1088.11	3.37397	4.8661
EIF1	9918.14	0.387915	0.112641	3.44381	0.000573579	0.00484444	11191.6	8456.88	417.873	315.765
ABCC9	120.925	0.951093	0.276234	3.44307	0.000575146	0.00485475	196.869	69.9271	1.15186	0.409138
LMBR1L	311.423	-0.681407	0.197957	-3.4422	0.000577009	0.00486753	230.471	398.902	4.47656	7.74808
LMO7	5312.29	0.634572	0.184367	3.44189	0.000577664	0.00487013	7050.4	4285.61	39.0021	23.7076
ARID4B	790.676	-0.416215	0.120943	-3.44142	0.000578667	0.00487564	661.19	895.016	5.11898	6.92928
KLHL26	139.07	-0.677476	0.197079	-3.4376	0.000586904	0.00494207	102.705	176.525	1.62876	2.79944
SLC9A3R2	1356.55	0.464926	0.135256	3.43738	0.00058737	0.00494302	1588.64	1127.64	33.2858	23.6268
DPY19L2P1	249.404	0.582199	0.16939	3.43703	0.000588135	0.00494648	317.488	203.203	5.586	3.57522
MICA	1544.51	0.56022	0.163072	3.43542	0.00059163	0.00497289	1899.66	1240.24	7.84431	5.12134
FLYWCH2	438.607	-0.464081	0.135112	-3.43479	0.000593012	0.00498151	368.129	518.421	17.7471	24.9925
SUSD4	40.3152	0.894064	0.260343	3.43418	0.000594345	0.00498875	61.219	25.6354	0.941884	0.394413
C1RL	1014.08	-0.690332	0.201024	-3.43407	0.000594586	0.00498875	697.114	1220.44	9.22353	16.1476
ALOX5AP	21.5302	-0.972164	0.283195	-3.43284	0.000597287	0.00500841	8.75067	30.3066	0.341142	1.18149
IQGAP3	3255.99	0.823922	0.240041	3.43242	0.000598219	0.00501022	4817.62	2307.67	39.4122	18.8787
TANGO6	391.196	0.567886	0.165441	3.43255	0.000597936	0.00501022	496.598	321.969	5.10311	3.3086
FAF1	1296.77	0.424784	0.123994	3.42584	0.000612901	0.00512705	1525.97	1119.69	29.2495	21.4621
ZNF606	119.235	-0.614481	0.179361	-3.42595	0.000612657	0.00512705	90.8865	146.357	1.06505	1.71508
CMSS1	580.663	0.583837	0.170468	3.4249	0.000615015	0.00514166	740.638	473.192	28.2289	18.0354
RAD51C	420.948	0.398134	0.116302	3.42327	0.000618737	0.00516969	494.618	370.792	16.1856	12.1336
BTN3A2	956.829	-0.569704	0.166446	-3.42275	0.000619911	0.00517641	725.413	1121.84	8.71737	13.4812
PSMD9	1673.41	0.447778	0.130831	3.42257	0.000620321	0.00517674	1932.59	1391.02	40.6817	29.2816
AP3S1	1471.5	0.441043	0.128905	3.42146	0.000622857	0.0051948	1662.32	1203.99	63.8498	46.2453
RRP7A	1045.63	0.541429	0.158346	3.41927	0.000627895	0.0052337	1346.71	894.329	12.223	8.11709
ALDH1A1	16.1371	-0.978857	0.286336	-3.41857	0.00062952	0.00524412	2.65491	17.0067	0.0554858	0.355428
TET1	71.829	-0.893773	0.26146	-3.41839	0.00062993	0.00524442	37.9505	93.1317	0.19605	0.481114
TJAP1	647.387	0.460658	0.134773	3.41803	0.000630768	0.00524721	762.231	542.728	12.0995	8.61519
IRAK1	6379.38	0.47995	0.140422	3.41792	0.000631015	0.00524721	7911.05	5544.84	109.684	76.877
SLC2A1	14176.2	-0.483903	0.141681	-3.41545	0.000636775	0.00527317	11383.4	16298.2	153.569	219.873
MTFMT	285.11	0.515642	0.150945	3.41609	0.000635262	0.00527317	338.158	229.861	6.09701	4.14441
CAPN15	1339.77	0.68223	0.199705	3.4162	0.000635023	0.00527317	1809.95	1043.96	18.8895	10.8952
ZNF555	65.3981	-0.841743	0.246407	-3.41607	0.00063531	0.00527317	40.914	88.9542	0.237004	0.515288
GATAD2A	2119.02	0.421127	0.123295	3.41559	0.000636435	0.00527317	2583	1900.68	22.5349	16.5821
MANBAL	1317.21	0.362928	0.106248	3.41587	0.00063578	0.00527317	1549.74	1193.72	58.3486	44.9441
SGOL1	397.23	0.776621	0.227385	3.41545	0.000636772	0.00527317	522.098	267.142	6.92085	3.54119
ZBTB14	246.476	-0.655112	0.191856	-3.41461	0.000638741	0.00528469	171.426	289.474	2.24772	3.79556
SDCCAG3	832.625	0.482607	0.141339	3.41453	0.000638921	0.00528469	1011.06	706.964	21.0417	14.713
AGPAT2	805.892	0.364412	0.106755	3.41354	0.000641247	0.0053008	941.243	724.002	30.1043	23.1561
ZNF564	70.6134	-0.819741	0.240192	-3.41286	0.000642853	0.00531094	41.8902	88.2005	0.703529	1.48129
STAT2	1942.87	-0.518625	0.152029	-3.41137	0.000646376	0.00533689	1429.28	2109.07	15.5526	22.9497
BAIAP2-AS1	534.266	-0.674281	0.197714	-3.41038	0.000648722	0.0053531	380.35	654.908	4.25951	7.33427
RAB36	215.591	-0.551159	0.161698	-3.40857	0.000653036	0.00538552	181.985	276.426	2.35745	3.58085
RFX2	86.9686	-0.657327	0.192935	-3.40698	0.000656858	0.00541239	68.7351	115.936	0.827605	1.39592
PHF8	358.694	-0.555068	0.162925	-3.40689	0.000657067	0.00541239	302.525	460.572	2.0711	3.15309
ABHD4	1183.61	-0.444984	0.130627	-3.40654	0.000657929	0.0054163	884.468	1225.2	17.4533	24.177
SPIN3	185.595	-0.553961	0.162643	-3.406	0.000659218	0.00542372	139.419	212.576	1.23704	1.88615
AXIN1	887.863	0.511765	0.150267	3.4057	0.00065995	0.00542656	1061.65	723.709	14.3614	9.78995
PRRX1	914.243	-0.601341	0.176609	-3.40493	0.000661802	0.00543859	692.856	1104.84	8.42634	13.4368
MKLN1	956.46	-0.51537	0.151404	-3.40393	0.000664239	0.00545541	775.439	1140.87	3.36274	4.94747
NRP2	2103.03	-0.549278	0.161383	-3.40357	0.000665122	0.00545946	1651.77	2507.06	10.5946	16.0806
NSFL1C	1824.88	0.396327	0.116525	3.40121	0.000670893	0.0055036	2087.01	1566.2	28.9113	21.6965
MYLK2	75.6331	-0.932776	0.274266	-3.40099	0.000671424	0.00550474	42.6148	116.428	0.755417	2.06388
ZFHX2	62.6017	-0.824174	0.242385	-3.40027	0.000673187	0.00551595	40.2138	84.7035	0.216838	0.456732
COX10-AS1	70.2397	-0.713356	0.20984	-3.39952	0.00067505	0.00552152	55.7757	100.109	1.42052	2.54961
ING5	427.609	0.641824	0.188794	3.3996	0.000674849	0.00552152	555.755	334.551	5.29352	3.18657
KIF6	33.9186	-0.91054	0.267832	-3.39967	0.000674663	0.00552152	17.0674	44.5927	0.199484	0.521201
ZNF12	349.196	-0.543159	0.15983	-3.39836	0.000677908	0.00554166	272.983	412.128	2.66999	4.03095
TRMT6	511.337	0.493551	0.145242	3.39812	0.000678506	0.00554331	618.148	428.417	13.0289	9.02986
RRP1	678.506	0.606729	0.1786	3.39714	0.000680938	0.00555346	883.079	550.862	24.1957	15.0932
JARID2	920.368	-0.58382	0.171842	-3.39743	0.00068021	0.00555346	686.394	1076.88	5.47506	8.58984
UBE2J1	2336.4	0.396045	0.116577	3.39727	0.000680608	0.00555346	2698.4	2025.68	30.769	23.0982
NUAK2	77.5045	-0.928067	0.273242	-3.3965	0.000682539	0.00556327	39.6579	108.606	0.571277	1.56449
POLR3D	645.773	0.429751	0.126547	3.39598	0.000683824	0.0055705	762.536	556.822	19.5716	14.2916
HSPA8	43344.6	0.591855	0.174312	3.39537	0.000685359	0.00557976	55688.8	35254	1120.81	709.53
MAP1A	2099.67	-0.589167	0.173625	-3.39333	0.000690478	0.00561816	1628.67	2566.55	7.84781	12.367
NFIA	268.238	-0.555303	0.163662	-3.39298	0.000691361	0.00562142	212.767	325.286	1.051	1.60681
PGAM5	948.396	0.544811	0.160576	3.39286	0.000691682	0.00562142	1193.8	789.821	18.1639	12.0174
HIST3H2A	94.1446	-0.785508	0.231595	-3.39174	0.000694511	0.00564114	56.5662	112.974	5.64642	11.2771
R3HCC1L	486.928	0.45261	0.133483	3.39077	0.00069697	0.00565782	536.639	384.812	7.45282	5.34425
MTRR	595.142	0.44321	0.130757	3.38956	0.000700041	0.00567947	729.886	527.596	10.9573	7.92042
CRNDE	281.507	0.490153	0.144626	3.38911	0.000701189	0.00568219	337.217	234.285	11.7411	8.15722
YIF1B	1795.79	0.411075	0.121291	3.38917	0.000701037	0.00568219	2098.69	1556.07	35.1989	26.0982
SIX5	389.403	-0.650888	0.192066	-3.38887	0.00070181	0.00568393	296.031	497.098	4.40008	7.38865
INO80D	306.144	-0.701511	0.207065	-3.38787	0.00070437	0.00569946	233.208	413.853	0.816799	1.4495
UNC80	30.904	-0.902353	0.266353	-3.38781	0.000704542	0.00569946	15.4486	39.6716	0.0563979	0.144828
FOXO3	1153.69	-0.562042	0.16592	-3.38743	0.000705501	0.00570392	912.383	1400.73	5.99583	9.20502
TIPRL	1129.18	0.44093	0.130186	3.38694	0.000706774	0.00571091	1264.04	915.334	18.9245	13.7039
DPY19L1	2334.46	-0.377846	0.111634	-3.3847	0.000712564	0.00575437	2031.67	2668.46	20.6761	27.1566
ZNF180	135.416	-0.622048	0.183805	-3.38429	0.000713627	0.00575964	108.259	176.113	1.16877	1.90132
NID2	3611.41	-0.608375	0.179813	-3.38338	0.000716001	0.00577547	2716.83	4366.57	26.6571	42.844
CARD10	480.942	-0.629825	0.186193	-3.38266	0.000717885	0.005784	403.276	660.564	5.1209	8.38801
CC2D2A	701.958	-0.417203	0.123333	-3.38272	0.000717711	0.005784	589.518	799.385	4.55128	6.17152
SMC4	7672.28	0.636697	0.188235	3.38245	0.000718422	0.00578499	9548.09	5772.19	82.4578	49.849
DDX39A	2402.9	0.612046	0.180967	3.38208	0.000719387	0.00578943	3021.03	1873.24	97.1252	60.2239
HSD17B7	284.335	0.775492	0.229396	3.38058	0.00072332	0.00581493	371.369	189.188	10.5067	5.35246
USP30	239.409	-0.599006	0.177191	-3.38056	0.000723387	0.00581493	182.128	290.464	2.0854	3.32587
MYLK	10288.4	-0.572891	0.169491	-3.38007	0.000724662	0.00582184	8216.88	12753.3	49.7155	77.163
TACC3	4421.53	0.703051	0.208068	3.37895	0.000727633	0.00584235	5898.03	3311.8	102.931	57.7966
C18orf8	458.181	0.534295	0.158158	3.37824	0.000729526	0.0058542	523.946	349.471	11.6536	7.77291
UBE2L6	576.804	-0.619519	0.183412	-3.37774	0.000730843	0.00585952	382.162	622.489	10.8554	17.682
CD2BP2	1739.52	0.372543	0.110296	3.37767	0.000731028	0.00585952	1954.09	1493.95	26.5209	20.2758
CRISPLD1	335.879	-0.567029	0.167973	-3.37572	0.000736219	0.00589776	254.666	393.91	2.74817	4.25081
LINC00639	61.1265	-0.921847	0.273107	-3.3754	0.000737077	0.00590104	37.2911	98.6561	0.428774	1.13435
PES1	2351.54	0.394777	0.116966	3.37514	0.000737787	0.00590104	2776	2085.15	47.8723	35.9585
ALDH5A1	243.645	-0.529517	0.156889	-3.3751	0.000737893	0.00590104	194.171	289.33	1.85948	2.77077
AGAP7P	30.4198	0.889989	0.263706	3.37493	0.000738349	0.00590131	42.6397	17.3752	0.877072	0.357398
SLC25A30	812.988	0.449845	0.133314	3.37432	0.000739978	0.00591096	916.113	658.275	11.4887	8.2552
COX17	470.431	0.513286	0.152158	3.37337	0.000742554	0.00592815	540.309	367.294	63.2411	42.9904
FOS	932.211	-0.769822	0.228241	-3.37285	0.000743932	0.00593576	109.488	2390.54	2.51196	54.8456
SNRK	226.119	-0.581939	0.172577	-3.37205	0.000746114	0.00594978	174.108	272.389	1.65296	2.58602
FAS	1057.42	0.599827	0.17792	3.37133	0.000748069	0.00596197	1211.97	760.223	22.315	13.9974
TIA1	1367.46	-0.418683	0.124203	-3.37096	0.000749077	0.00596657	1166.05	1582.44	12.4074	16.838
PLK4	939.007	0.68078	0.201973	3.37064	0.000749925	0.00596657	1241.74	715.188	15.389	8.86341
ZNF280C	77.3364	-0.714539	0.211986	-3.37069	0.000749792	0.00596657	56.7089	102.465	0.598017	1.08053
WDR1	13932.5	0.447103	0.132662	3.37024	0.00075103	0.00597197	17266	12431.5	271.985	195.828
THOC1	514.001	0.540635	0.160427	3.36997	0.000751773	0.00597448	628.071	417.185	14.668	9.74295
PIAS4	356.475	-0.55337	0.16425	-3.36907	0.000754211	0.00599045	294.479	448.15	4.54624	6.91866
DNAJB6	2643.4	0.46012	0.136623	3.3678	0.000757692	0.00601469	2997.7	2134.88	46.5259	33.1345
SART1	1607.84	0.522686	0.155235	3.36706	0.000759734	0.00602748	1979.97	1335.6	27.2228	18.3633
ARMC9	1598.66	-0.470848	0.139891	-3.36582	0.000763157	0.0060512	1171.93	1660.44	8.16416	11.5673
ROBO1	1531.2	-0.492281	0.146287	-3.36517	0.00076497	0.00606215	1280.57	1848.92	8.02448	11.586
DDX59	287.749	0.497053	0.147744	3.36429	0.000767404	0.006078	351.145	242.589	7.49369	5.17702
MASTL	951.152	0.695966	0.2069	3.36377	0.000768846	0.00608598	1245.01	703.952	16.9997	9.61198
PAX6	1183.13	-0.523069	0.155539	-3.36294	0.000771161	0.00610085	862.943	1280.96	4.50826	6.69209
TULP4	835.448	-0.524063	0.155917	-3.36117	0.000776139	0.00613676	663.057	984.33	2.95245	4.38301
CHERP	1111.98	0.602005	0.179184	3.35971	0.000780241	0.00616571	1433.49	897.222	17.3316	10.8478
WNT7B	23.9508	-0.940853	0.280212	-3.35764	0.000786097	0.00620848	4.54232	35.5775	0.0574585	0.450041
CTSD	80361.6	-0.546639	0.16286	-3.3565	0.000789357	0.00623071	58673.9	88942.3	1368.33	2074.23
AGO1	851.399	-0.488803	0.145653	-3.35594	0.000790948	0.00623624	746.854	1073.79	4.94479	7.10938
C9orf89	1042.25	-0.614496	0.1831	-3.35607	0.000790598	0.00623624	744.609	1206	40.6909	65.9045
KNTC1	1341.06	0.639672	0.190657	3.35509	0.000793381	0.00624838	1755.08	1056.71	12.4759	7.51161
LRPPRC	2304.03	-0.497863	0.148388	-3.35515	0.000793228	0.00624838	2022.37	2932.53	15.1274	21.9355
KIF14	1989.09	0.773304	0.230521	3.3546	0.000794807	0.00625609	2619.8	1336.13	17.8243	9.09065
SRP68	1992.53	0.355053	0.105882	3.35329	0.00079858	0.00628225	2219.75	1720.05	35.9388	27.8485
FZD8	1325.56	-0.805795	0.240322	-3.35298	0.000799474	0.00628575	908.495	1870.17	14.118	29.0625
C1orf74	77.9099	-0.782806	0.233481	-3.35277	0.000800085	0.00628702	56.652	111.784	0.577728	1.13996
SNRPF	1419.42	0.401007	0.119626	3.35216	0.000801839	0.00629021	1655.01	1236.63	103.199	77.1111
SACM1L	1338.2	0.545686	0.162783	3.35223	0.000801642	0.00629021	1568.97	1035.96	20.9551	13.8362
EIF4EBP1	1201.13	0.437821	0.130607	3.35219	0.000801741	0.00629021	1465.03	1062.76	84.4406	61.2548
BAG4	377.41	-0.487022	0.145327	-3.3512	0.000804612	0.00630843	305.618	439.073	3.38963	4.86979
ADARB1	287.626	0.760567	0.226968	3.35098	0.000805247	0.00630987	404.289	210.226	2.80147	1.45674
RASA1	2069.57	0.486914	0.145323	3.35056	0.000806485	0.00631604	2436.05	1695.22	27.0973	18.8567
MATN2	315.784	-0.639174	0.190781	-3.3503	0.000807229	0.00631833	248.402	412.716	2.9938	4.97415
METTL14	426.69	-0.454747	0.135742	-3.35008	0.000807896	0.00632001	355.265	496.733	5.01979	7.0187
NFE2	21.7179	-0.906619	0.270766	-3.34835	0.000812936	0.00634987	11.494	30.6167	0.277868	0.740161
LYPD6	60.2452	-0.779112	0.232687	-3.34832	0.000813023	0.00634987	46.4015	90.9671	0.533278	1.04546
ZNF92	131.286	-0.615593	0.183852	-3.34831	0.000813074	0.00634987	104.725	169.436	1.55147	2.51013
ANKLE2	2709.4	0.317339	0.0947809	3.34813	0.000813595	0.00635039	3034.88	2420.5	33.5249	26.7381
YEATS2	1738.68	0.441274	0.131828	3.34735	0.000815873	0.00636463	2104.73	1522.45	16.0169	11.5858
NLRP10	5.78113	0.841307	0.251349	3.34716	0.000816439	0.0063655	12.458	0.614859	0.152674	0.00753514
MIOS	540.892	0.433105	0.129407	3.34685	0.000817348	0.00636904	664.624	483.916	9.90246	7.21002
CLUH	1997.71	0.641773	0.191813	3.34582	0.000820388	0.00638643	2765.25	1661.11	26.2077	15.7432
FOXS1	177.193	-0.938605	0.280533	-3.34579	0.000820493	0.00638643	63.1555	337.717	2.37243	12.6863
BTN3A1	303.909	-0.613591	0.183431	-3.34508	0.000822601	0.00639928	222.054	359.733	2.62324	4.24971
MEST	2443.53	-0.779811	0.233139	-3.34484	0.000823305	0.0064012	1738.02	3439.64	28.6072	56.6151
CSF1	2714.13	-0.658989	0.197072	-3.34389	0.000826113	0.00641946	1661.47	2826.27	16.7366	28.47
ANKRD17	2114.71	-0.593618	0.177601	-3.34242	0.000830499	0.00644996	1757.06	2784.66	9.14176	14.4882
TEF	390.354	-0.731137	0.218831	-3.34111	0.000834433	0.00647692	273.195	506.451	2.90071	5.37736
MAMSTR	35.9968	-0.842829	0.252312	-3.34042	0.000836506	0.00648942	23.4879	52.0611	0.509373	1.12903
PTPN4	412.597	-0.521229	0.156057	-3.33999	0.000837818	0.00649599	326.384	483.529	1.41999	2.10367
SRD5A3	358.713	0.447461	0.133979	3.33979	0.000838411	0.00649699	421.353	303.281	5.11184	3.67939
ZC3HC1	504.117	0.450508	0.13492	3.33908	0.000840569	0.00651011	574.596	412.511	14.0974	10.1207
ATM	1088.44	-0.716439	0.214598	-3.33852	0.000842264	0.00651602	819.743	1487.98	3.08708	5.60363
LLPH	719.742	0.495572	0.148436	3.33862	0.000841956	0.00651602	850.145	587.227	34.586	23.8898
LHFP	596.178	0.405184	0.121387	3.33796	0.000843966	0.00652559	715.473	532.829	16.4149	12.2246
PRMT5	1871.52	0.505922	0.151589	3.33745	0.000845506	0.00653388	2322.49	1589.48	43.9555	30.0826
NEDD4L	2872.55	0.601515	0.180281	3.33653	0.000848313	0.00655195	3649.74	2283.15	18.7022	11.6995
HS3ST1	253.897	-0.798249	0.239259	-3.33634	0.000848886	0.00655276	163.874	334.943	4.129	8.43928
LSG1	983.985	0.514838	0.154349	3.33555	0.000851309	0.00656785	1199.7	814.445	16.6287	11.2888
TMEM57	547.369	0.4358	0.130696	3.33445	0.00085469	0.00658667	627.857	456.301	7.81632	5.68058
GOT1	2373.58	0.559802	0.167878	3.33457	0.00085431	0.00658667	2910.43	1895.81	67.7465	44.1291
ZAK	2487.22	0.422802	0.126839	3.33338	0.000857987	0.00660844	2999.85	2202.82	15.0664	11.0634
KDM2B	810.471	-0.431474	0.129512	-3.33155	0.000863637	0.0066483	715.597	980.925	6.16488	8.45068
CHTF18	937.377	0.714387	0.214537	3.32991	0.000868748	0.00668397	1336.31	737.785	21.4114	11.8214
NOTCH2NL	672.531	0.391551	0.117662	3.32777	0.000875448	0.00673181	753.564	567.497	7.00776	5.27744
SNRPG	1719.15	0.41813	0.125723	3.32582	0.000881594	0.00677535	1985.42	1463.03	169.774	125.104
MCL1	4220.69	-0.64503	0.194077	-3.32358	0.000888712	0.0068263	3332.05	5574.72	40.3847	67.5661
RPL36AL	2684.78	0.327112	0.0984608	3.32225	0.000892933	0.00685496	3000.93	2374.65	257.948	204.115
CENPO	1183.06	0.66849	0.201225	3.3221	0.000893435	0.00685506	1570.11	914.096	18.3169	10.6638
RNFT1	184.171	0.535581	0.161329	3.3198	0.000900807	0.00690784	195.27	130.105	4.7956	3.19523
TBC1D20	990.439	-0.403757	0.12163	-3.31956	0.000901608	0.00691019	844.135	1131.77	9.35188	12.5385
XRN1	915.115	-0.478604	0.144185	-3.31937	0.000902199	0.00691093	773.398	1103.79	3.54254	5.05589
ABT1	374.122	-0.558881	0.168404	-3.3187	0.000904373	0.00692379	303.176	464.507	6.63297	10.1626
PSME4	2001.91	0.411041	0.123892	3.31773	0.000907529	0.00694416	2418.44	1792.71	16.8669	12.5029
COL12A1	9884.97	-0.653569	0.197067	-3.31647	0.000911616	0.00697162	8109.6	13694.4	34.6757	58.5558
LRIG2	146.235	-0.616756	0.18598	-3.31626	0.000912317	0.00697317	111.277	180.849	1.21459	1.97397
VPS72	511.302	-0.615287	0.18556	-3.31583	0.000913706	0.00697998	411.061	666.286	13.0127	21.0922
CSTF1	557.696	-0.52962	0.159743	-3.31546	0.00091492	0.00698544	457.229	682.034	8.80158	13.129
SERPINB8	1307.12	0.508622	0.153423	3.31515	0.000915928	0.00698932	1568.92	1070.75	20.5172	14.0024
BCDIN3D	42.1016	-0.832839	0.251259	-3.31467	0.000917527	0.0069977	25.8036	56.8734	0.393213	0.866676
RAB22A	1369.01	0.342702	0.103416	3.31382	0.000920306	0.00701126	1481.99	1159.25	8.48156	6.63451
CENPE	2642.88	0.7844	0.236704	3.31384	0.000920251	0.00701126	3562.3	1776.28	20.4726	10.2083
ZKSCAN3	83.66	-0.700906	0.211524	-3.3136	0.000921042	0.00701291	57.6405	103.437	0.589386	1.05767
ARHGAP6	78.6204	-0.783087	0.236336	-3.31345	0.000921524	0.00701291	48.2656	97.4607	0.372511	0.752195
CDK11A	406.075	0.556734	0.168164	3.31066	0.000930755	0.0070793	491.964	321.177	9.27194	6.05315
SULT1B1	15.4077	0.918298	0.277434	3.30998	0.00093304	0.00709283	30.2382	5.24975	1.1437	0.198562
SDAD1	976.709	0.506246	0.152958	3.3097	0.00093395	0.00709589	1162.07	794.645	18.5357	12.675
NAGK	1197.54	0.430143	0.13	3.30879	0.000937013	0.0071153	1317.59	960.726	36.2213	26.4109
HOXB9	111.408	-0.769443	0.232598	-3.30804	0.000939526	0.00713051	81.1952	158.773	1.48889	2.91145
POLR3G	262.23	0.600791	0.18165	3.30741	0.000941645	0.00714272	347.384	217.767	5.23566	3.28212
KLHL3	129.979	-0.687439	0.207918	-3.30629	0.000945385	0.00716721	91.988	161.709	0.578333	1.01667
TFB2M	377.044	0.511958	0.154905	3.30497	0.00094987	0.00718473	447.927	304.912	12.4172	8.45259
SYNJ2BP	864.069	-0.379417	0.114811	-3.3047	0.000950777	0.00718473	742.605	977.353	5.20775	6.854
IGF1R	850.551	-0.468586	0.141788	-3.30484	0.000950311	0.00718473	668.259	946.204	2.7042	3.82894
GATA6	497.336	-0.638927	0.193319	-3.30503	0.000949652	0.00718473	376.765	627.761	4.94011	8.23113
ZC3H8	130.833	0.640439	0.19376	3.30532	0.000948693	0.00718473	168.621	101.36	5.20807	3.13062
IER5L	407.292	-0.765577	0.231634	-3.30511	0.000949377	0.00718473	269.188	525.657	4.91795	9.60353
ARID2	603.054	-0.507287	0.15356	-3.30352	0.000954803	0.00721126	511.716	748.651	2.9926	4.37823
KMT2E-AS1	43.2286	-0.90875	0.275181	-3.30237	0.000958703	0.00723681	20.9809	57.9656	0.288549	0.797196
ZNF385D	178.599	-0.775166	0.234761	-3.30193	0.000960221	0.00724436	111.029	220.618	3.03371	6.02811
PRUNE	282.293	-0.486823	0.147452	-3.30156	0.000961479	0.00724994	230.92	331.8	3.70839	5.32844
HEATR6	387.95	-0.453477	0.137376	-3.30099	0.000963446	0.00726087	338.963	473.18	4.26486	5.95359
PLGRKT	328.314	0.463806	0.140538	3.30021	0.000966141	0.00727726	394.398	280.023	19.566	13.8919
NCAPG	2224.46	0.706946	0.214273	3.29927	0.000969357	0.00729755	2981.39	1655.17	31.0627	17.245
SLC20A2	1072.68	0.572741	0.173658	3.2981	0.000973411	0.00732413	1417.01	910.784	15.7726	10.1379
SCAI	175.749	-0.5062	0.153492	-3.29789	0.000974144	0.00732571	144.933	212.195	0.587691	0.860434
RPF1	721.052	0.480227	0.145664	3.2968	0.000977918	0.00735014	863.813	604.619	21.6546	15.157
ZNF284	30.0601	-0.829045	0.251484	-3.29661	0.000978578	0.00735115	18.6606	40.9321	0.418432	0.917829
SNX7	1187.58	0.383458	0.116351	3.29571	0.000981745	0.00736703	1271.92	963.835	33.1964	25.1555
LYPLA1	2026.85	0.454767	0.137984	3.29579	0.000981458	0.00736703	2347.73	1678.32	41.6621	29.783
G2E3	1297.84	0.686764	0.2084	3.29541	0.000982784	0.00737088	1665.86	947.114	14.2154	8.08206
MLLT10	798.571	0.44375	0.134682	3.2948	0.000984904	0.00737929	925.043	667.309	7.7626	5.5998
PKM	94967.6	-0.399096	0.12113	-3.29479	0.00098496	0.00737929	79981	106914	1244.86	1664.06
PLS3	9275.28	0.333858	0.101335	3.29461	0.000985571	0.00737991	10777.1	8485.6	125.135	98.5287
DOK1	756.38	-0.426085	0.129396	-3.29289	0.00099165	0.00742078	647.581	885.025	13.3259	18.212
UNC5D	118.195	-0.914551	0.277746	-3.29276	0.000992089	0.00742078	56.7495	160.705	0.385418	1.09144
ZNF500	223.798	-0.590501	0.17935	-3.29246	0.000993161	0.0074232	179.477	283.801	2.68865	4.25148
TPD52	541.264	0.39996	0.121481	3.29237	0.000993473	0.0074232	618.153	462.544	6.21675	4.6518
GSPT2	279.314	-0.610728	0.185558	-3.29131	0.000997226	0.00744726	213.588	345.046	3.7157	6.0026
HKDC1	80.9994	0.731199	0.222226	3.29034	0.00100068	0.00746906	98.0589	52.4355	1.31606	0.703743
CCNG2	810.981	-0.610477	0.18555	-3.29009	0.00100156	0.00747163	526.627	853.205	4.76316	7.71696
BUB1B	3528.41	0.75651	0.229958	3.28977	0.00100269	0.00747609	4668.37	2419.45	61.7674	32.0119
GOLGA1	611.703	0.381725	0.116055	3.28916	0.00100486	0.0074843	665.98	505.227	6.75399	5.12373
PTRH1	173.875	0.691817	0.210323	3.28931	0.00100435	0.0074843	234.96	132.65	14.2736	8.05836
ZNF687	627.646	-0.488664	0.148578	-3.28893	0.0010057	0.00748655	518.762	746.595	4.64116	6.67949
MYO5B	94.1144	-0.656602	0.199692	-3.28807	0.00100877	0.0075054	67.9307	115.621	0.353286	0.601307
IST1	1869.1	-0.39851	0.121205	-3.28791	0.00100933	0.00750563	1596.98	2133.59	18.6084	24.8612
GLCE	659.456	-0.434479	0.132213	-3.28622	0.00101542	0.00754402	580.163	798.321	5.69585	7.83766
TSEN34	842.038	-0.432073	0.131482	-3.28618	0.00101557	0.00754402	753.082	1033.33	1.35579	1.86033
ZBTB20	567.389	-0.765758	0.233047	-3.28586	0.00101673	0.0075486	392.16	766.936	0.685788	1.34118
PTK2B	130.874	-0.812845	0.247401	-3.28554	0.00101787	0.00755307	77.186	164.399	0.795321	1.69396
ZNF287	125.736	-0.67833	0.20652	-3.28458	0.00102135	0.00757488	94.3864	164.304	1.09236	1.90154
ST3GAL6	315.382	0.476588	0.145123	3.28403	0.00102334	0.00758564	386.441	271.381	4.85853	3.41193
UBE2T	768.576	0.632461	0.192673	3.28256	0.00102871	0.00761873	1006	608.02	54.6135	33.0081
TFAP2A	416.049	-0.559991	0.170599	-3.2825	0.0010289	0.00761873	343.538	528.124	4.00018	6.14951
SENP1	463.467	-0.574749	0.175124	-3.28196	0.00103087	0.00762128	399.918	622.644	3.65384	5.68877
CTDNEP1	1878.14	-0.412407	0.125657	-3.282	0.00103072	0.00762128	1662.95	2246.36	44.3846	59.9561
SEC24A	1263.98	0.509281	0.15517	3.28208	0.00103044	0.00762128	1460.86	995.713	10.2462	6.98374
METAP1D	117.225	0.604109	0.184085	3.28168	0.00103191	0.00762492	157.848	98.3996	5.09461	3.17589
HSD17B12	2037.38	0.359953	0.109818	3.27774	0.00104642	0.00772804	2239.77	1728.42	43.5726	33.6247
LOC100506100	70.9327	-0.690859	0.210818	-3.27704	0.001049	0.007743	51.1142	90.519	4.39356	7.78063
TMEM127	2044.49	-0.378798	0.115608	-3.27657	0.00105075	0.00774778	1692.47	2225.58	18.2441	23.9907
WWTR1	4345.7	-0.583299	0.17802	-3.27659	0.00105067	0.00774778	3266.39	5141.35	30.1324	47.4289
SEMA3B	1119.7	-0.628314	0.191798	-3.27591	0.00105321	0.00776184	826.634	1363.08	12.1554	20.0436
EHD2	4009.53	-0.619209	0.189073	-3.27497	0.00105671	0.00778353	3274.77	5342.42	45.2387	73.8019
KIAA0020	809.659	0.531132	0.162203	3.2745	0.00105851	0.00779264	1059.13	707.718	23.6314	15.7907
LMOD1	272.76	-0.582772	0.177995	-3.27409	0.00106002	0.00779969	226.829	357.22	2.83096	4.45832
PNRC1	708.033	-0.77286	0.236065	-3.27393	0.00106063	0.00780009	405.266	808.098	9.40692	18.7573
TEC	32.9087	-0.853231	0.260746	-3.27227	0.00106687	0.00784184	21.4549	49.0085	0.293437	0.670287
HAX1	999.175	0.342809	0.104793	3.2713	0.00107056	0.0078648	1111.33	869.121	46.7083	36.5285
SLC4A7	2045.3	0.445663	0.136277	3.27026	0.00107448	0.00788949	2491.34	1793.63	15.0259	10.8178
TWISTNB	737.407	0.441875	0.135133	3.26993	0.00107572	0.00789409	888.214	641.307	11.2991	8.15814
CRCP	856.679	0.40172	0.122862	3.26968	0.00107668	0.00789409	979.832	731.485	16.5966	12.3901
SLC25A43	352.59	0.470452	0.143884	3.26965	0.0010768	0.00789409	417.393	294.502	8.12317	5.73149
TRA2B	3871.45	0.422194	0.129173	3.26842	0.00108148	0.00792428	4537.42	3330.56	52.3904	38.4556
TK2	1302.08	-0.437495	0.133896	-3.26742	0.00108534	0.00794424	1015.82	1401.87	8.19515	11.3096
WDR36	1249.64	-0.516205	0.15798	-3.26753	0.0010849	0.00794424	1059.93	1565.08	7.96082	11.7549
ZNF16	104.53	-0.651322	0.199349	-3.26724	0.00108601	0.00794495	73.4145	124.615	1.38944	2.35848
CBR3	514.322	0.467434	0.143084	3.26685	0.00108751	0.00795178	616.507	435.666	27.4493	19.3975
B4GALT3	1039.24	0.392904	0.120284	3.26646	0.00108901	0.00795861	1136.39	854.418	23.2974	17.5166
FAM98A	2267.43	0.507591	0.155416	3.26602	0.00109072	0.00796695	2754.05	1879.12	48.4729	33.0737
FAM195B	1379.23	0.394284	0.120739	3.26559	0.00109238	0.00796747	1558.43	1170.07	54.299	40.7675
RBM43	210.136	-0.742869	0.227477	-3.26569	0.00109198	0.00796747	131.837	251.45	1.66768	3.18074
LINC00472	248.795	-0.607351	0.185987	-3.26555	0.0010925	0.00796747	179.64	289.669	0.929856	1.49939
LSM5	1121.95	0.496214	0.151969	3.26523	0.00109374	0.00796975	1305.08	899.407	19.7902	13.6386
MAMDC2	446.376	-0.558727	0.171117	-3.26518	0.00109395	0.00796975	341.829	526.145	2.8763	4.42721
ZNF821	93.6543	-0.703664	0.215712	-3.26205	0.00110608	0.00805212	67.1736	121.15	1.4664	2.64472
F2RL2	1365.17	-0.407556	0.124942	-3.26197	0.00110641	0.00805212	1169.22	1574.28	16.8821	22.7306
C1orf159	344.311	0.613223	0.188024	3.26141	0.00110858	0.00806371	431.066	265.362	10.1437	6.24439
PPP2R5A	604.418	0.450155	0.138032	3.26124	0.00110927	0.00806457	675.196	484.319	9.78896	7.02164
EXTL2	878.912	-0.514069	0.1577	-3.2598	0.00111492	0.008093	715.463	1055.57	10.505	15.4988
DKK1	586.216	0.615318	0.188752	3.25993	0.00111439	0.008093	764.882	470.185	20.9805	12.897
CAMSAP1	1354.11	0.381401	0.116993	3.26004	0.00111397	0.008093	1608.08	1219.71	10.4333	7.9136
FRAT2	113.114	-0.771195	0.23664	-3.25893	0.00111833	0.00811351	70.0426	139.295	1.57272	3.12768
PREB	888.919	0.376762	0.115622	3.25857	0.00111977	0.00811977	1027.76	782.243	23.5035	17.8888
ZBTB1	782.043	-0.558829	0.171528	-3.25795	0.00112221	0.00813326	592.088	910.288	5.17195	7.95146
CNIH4	1387.34	0.375026	0.115131	3.25739	0.0011244	0.00814492	1557.36	1186.66	32.4518	24.7273
STAMBPL1	485.181	0.49312	0.151392	3.25723	0.00112504	0.00814537	594.654	410.926	14.06	9.71592
CWC25	429.298	0.399914	0.122811	3.25634	0.0011286	0.00816687	489.271	365.828	3.7615	2.81247
MAP2K7	824.769	-0.370569	0.113841	-3.25514	0.00113338	0.00819723	738.795	964.967	10.3153	13.4732
DNHD1	144.935	0.673393	0.206931	3.25419	0.00113714	0.00821923	181.958	104.503	0.574543	0.329973
HEXIM1	2823.78	-0.395363	0.121498	-3.25408	0.0011376	0.00821923	2363.39	3151.7	24.4541	32.6107
ERMP1	739.575	-0.45602	0.14019	-3.25288	0.00114243	0.00824988	572.157	802.657	5.30383	7.44055
NEXN	1182.27	0.555313	0.170763	3.25195	0.00114617	0.00826411	1569.63	1024.76	22.9311	14.9709
KIF20B	3843.47	0.752645	0.231439	3.25203	0.00114586	0.00826411	5262.9	2731.65	40.3983	20.9683
LRFN4	932.291	0.552988	0.170037	3.25216	0.00114532	0.00826411	1106.82	723.544	21.6769	14.1705
ZGRF1	290.422	0.730148	0.224647	3.2502	0.00115325	0.00830755	408.623	219.123	3.00165	1.60963
SUN3	16.8424	0.910893	0.28026	3.25016	0.00115338	0.00830755	22.6632	7.52043	0.731465	0.242725
TRIM59	877.971	0.573992	0.176652	3.24927	0.001157	0.00832933	1074.27	688.16	13.7223	8.79028
CYP26B1	69.1622	-0.827177	0.254627	-3.24858	0.00115982	0.00834533	35.332	79.2124	0.383957	0.860809
PFKM	1802.23	-0.386212	0.118897	-3.24828	0.00116103	0.00834749	1557.19	2061.22	20.1667	26.6942
GDNF	115.47	0.879677	0.270818	3.24822	0.00116131	0.00834749	158.462	62.4581	1.87647	0.739616
RCAN3	273.606	0.510396	0.157141	3.24802	0.00116211	0.00834893	311.472	212.073	5.08949	3.4653
RELA	1732.12	0.323536	0.0996484	3.24678	0.0011672	0.00838124	1928.05	1529.64	37.0282	29.3768
FRAS1	644.407	-0.757823	0.23342	-3.2466	0.00116791	0.008382	480.778	932.045	1.43872	2.78912
KRBA2	38.8444	-0.824546	0.253989	-3.24638	0.00116881	0.00838418	24.3136	53.677	0.433327	0.95665
POLR3F	356.808	0.444157	0.136833	3.24599	0.00117043	0.00839147	422.758	304.599	9.00644	6.48917
RABGAP1L	483.876	0.449945	0.138695	3.24414	0.00117804	0.00843743	572.261	410.322	2.72616	1.9547
MDFIC	2135.55	0.428796	0.132171	3.24425	0.0011776	0.00843743	2381.11	1737.82	21.3608	15.5899
SOX6	24.7652	-0.916637	0.282566	-3.24398	0.00117873	0.00843803	12.1152	37.02	0.0640641	0.195758
NCF2	43.9986	0.892955	0.275299	3.24358	0.00118038	0.00844553	62.1285	23.2413	1.23337	0.461384
CALD1	8363.78	0.414347	0.127797	3.24223	0.00118598	0.00848126	10072.7	7439.65	90.5747	66.8981
KRIT1	719.414	0.37814	0.116648	3.24171	0.00118816	0.00849249	798.115	606.847	7.79083	5.92376
NOP2	1365.53	0.658368	0.20314	3.24095	0.00119131	0.00851067	1864.84	1093.03	30.9726	18.1538
CDC42EP1	2916.78	0.504953	0.155828	3.24045	0.00119342	0.00852136	3601.93	2461.98	82.4853	56.3802
SEMA6B	910.939	-0.62444	0.19277	-3.2393	0.00119823	0.00854704	725.314	1192.55	9.10975	14.9781
EBAG9	325.27	0.487501	0.150493	3.23936	0.00119798	0.00854704	370.769	257.583	6.55372	4.55304
PDIA4	7620.65	0.568746	0.175628	3.23835	0.00120223	0.00857119	9690.57	6239.99	162.529	104.656
RICTOR	576.405	-0.474729	0.146604	-3.23817	0.00120298	0.00857218	475.531	677.091	2.44916	3.48727
TEX261	2827.44	0.353807	0.1093	3.23704	0.00120777	0.00860192	3251.7	2519.93	47.815	37.0547
KCNAB2	113.438	-0.629551	0.194533	-3.23622	0.00121125	0.00862228	76.8333	127.584	0.660656	1.09704
DPYSL2	4204.73	-0.613825	0.189721	-3.23541	0.00121466	0.0086422	3422.07	5562.42	32.3522	52.587
DR1	1727.85	0.394491	0.121964	3.2345	0.00121857	0.00865563	1973.46	1480.89	30.4573	22.8552
PELI2	142.078	-0.702238	0.217112	-3.23445	0.00121878	0.00865563	97.5034	176.018	0.847514	1.52998
POLR2C	1452.83	0.296256	0.0915939	3.23445	0.00121875	0.00865563	1609.82	1303.79	44.1812	35.7824
SCAF1	2260.37	0.488813	0.15113	3.23439	0.00121902	0.00865563	2740.85	1899.93	31.4632	21.8099
MBNL2	1030.3	-0.503627	0.155733	-3.2339	0.00122111	0.00866602	813.27	1189.37	8.50378	12.4364
ADGRB2	892.425	-0.554683	0.171611	-3.23221	0.00122839	0.00871328	729.505	1118.26	6.63937	10.1775
ABCA1	1274.74	-0.91176	0.282162	-3.23133	0.00123214	0.00873545	556.375	1695.58	2.62297	7.99361
SENP3-EIF4A1	8.20889	0.921017	0.285124	3.23024	0.00123687	0.00876457	15.4302	3.75069	0.17754	0.0431556
PDPR	1714.94	-0.522044	0.161627	-3.22994	0.00123817	0.00876931	1494.18	2219.59	9.24835	13.7383
CUL7	1481.36	-0.456126	0.141257	-3.22904	0.00124205	0.00879236	1242.75	1742.47	10.9952	15.4164
ZBED5-AS1	112.067	-0.652081	0.201997	-3.22818	0.0012458	0.00881445	78.3597	133.168	3.48574	5.92384
DLEU1	221.69	-0.651899	0.201997	-3.22727	0.00124979	0.00883417	166.686	282.607	2.08244	3.53067
MICALL2	263.964	-0.638005	0.197693	-3.22725	0.00124985	0.00883417	207.066	345.412	3.30814	5.51841
SLC39A11	223.576	-0.507682	0.157339	-3.22667	0.00125238	0.00884758	177.349	259.907	3.15623	4.6255
CHP1	1878.56	-0.392626	0.121696	-3.22628	0.0012541	0.00885525	1556.13	2070.57	23.8676	31.758
RSL1D1	2582.65	0.421077	0.13057	3.22492	0.00126007	0.00889035	3038.91	2231.94	29.2891	21.5115
ZDHHC21	564.364	0.415878	0.12896	3.22486	0.00126034	0.00889035	650.262	479.833	3.5105	2.59042
CREB1	894.444	-0.36307	0.112652	-3.22295	0.0012688	0.00894551	774.241	1006.58	3.91994	5.09628
LIN9	317.546	0.644045	0.19986	3.22248	0.00127085	0.00895549	401.67	238.89	5.7344	3.41049
TSPAN10	457.688	-0.498657	0.154761	-3.22211	0.00127251	0.00896264	312.149	454.126	7.21844	10.5016
TAGLN	9816.36	0.663415	0.205916	3.22177	0.00127402	0.00896874	13778.3	8020.5	438.13	255.041
SLC12A4	1889.07	0.487031	0.151196	3.22118	0.00127664	0.00898269	2309.89	1603.36	22.7545	15.7945
SF1	4507.18	0.514674	0.15984	3.21994	0.00128219	0.00901004	5559.52	3764.75	65.1183	44.0962
CLDND2	8.25728	-0.913135	0.283584	-3.21998	0.00128199	0.00901004	3.46285	15.3573	0.176024	0.780643
BEX1	4596.11	-0.631195	0.196031	-3.21988	0.00128246	0.00901004	3439.62	5705.94	197.561	327.731
RNF213	2017.28	-0.615177	0.191082	-3.21944	0.00128443	0.00901935	1625.18	2647.58	3.46721	5.64842
LCAT	100.932	0.780843	0.242557	3.21922	0.0012854	0.00902164	143.475	70.7502	5.24631	2.58706
VPS11	763.475	-0.417729	0.129809	-3.21803	0.00129075	0.00905468	653.083	886.281	9.32366	12.6529
SYT7	19.251	0.912738	0.283716	3.21709	0.00129499	0.00907988	35.4837	12.1418	0.268955	0.0920308
RCE1	263.981	0.444498	0.138222	3.21582	0.00130072	0.00911548	314.928	226.6	10.5997	7.62685
RALB	1755.44	0.343037	0.106839	3.21077	0.00132381	0.00927261	1933.3	1511.14	42.3347	33.0903
DYNC2H1	1025.94	-0.649939	0.202444	-3.21046	0.00132523	0.00927791	836.288	1415.41	3.02249	5.11555
[truncated: 24,486 more rows]

## Sheet: DESeq2_RPE1_Taxol
GeneID	baseMean	log2FoldChange	lfcSE	stat	pvalue	padj	RPEtaxol.count.mean	RPEctrl.count.mean	RPEtaxol.fpkm.mean	RPEctrl.fpkm.mean
UNG	567.309	-1.02974	0.11446	-8.99649	2.33e-19	3.09e-15	430.32	905.842	9.0048	18.9555
TUBB6	7698.11	1.00094	0.149625	6.6897	2.24e-11	1.48e-07	10409.6	4922.17	155.752	73.6474
AEN	1094.57	0.816835	0.123361	6.62152	3.56e-11	1.57e-07	1255.66	691.95	19.9514	10.9945
SNHG3	698.302	-0.942296	0.148299	-6.35402	2.1e-10	5.56e-07	510.209	1030.32	10.7676	21.7442
BCOR	757.311	-0.718751	0.112878	-6.36751	1.92e-10	5.56e-07	650.048	1092.03	4.77086	8.01465
ATP1B1	1102.75	-0.910019	0.148223	-6.13953	8.28e-10	1.83e-06	838.439	1652.87	18.8689	37.1974
OAS1	102.1	1.73154	0.283449	6.10883	1e-09	1.9e-06	254.469	36.3022	6.33428	0.903639
TUBA4A	962.141	0.974166	0.161388	6.03617	1.58e-09	2.61e-06	1715.33	820.89	32.7904	15.6922
TUBA1A	18278	1.06019	0.176911	5.99278	2.06e-09	3.04e-06	31433.7	13841.4	628.554	276.775
IFITM1	75.6109	1.63932	0.274392	5.97436	2.31e-09	3.06e-06	172.545	31.5969	11.9147	2.18184
CCNE2	211.55	-1.55293	0.261662	-5.93484	2.94e-09	3.54e-06	90.8613	415.306	1.65025	7.54292
IFI6	586.546	1.45026	0.255255	5.6816	1.33e-08	1.47e-05	1178.22	302.318	67.8307	17.4046
TUBB3	7260.81	0.897949	0.162518	5.52522	3.29e-08	3.35e-05	12209.4	6179.69	301.344	152.522
TUBB2A	453.657	1.03559	0.188934	5.48124	4.22e-08	4e-05	733.491	324.003	20.7162	9.1509
TROAP	2080.58	1.09808	0.200848	5.4672	4.57e-08	4.04e-05	2262.66	925.811	39.2796	16.072
CBX2	101.302	-1.06296	0.196103	-5.4204	5.95e-08	4.38e-05	67.8537	159.062	0.672432	1.57631
GDF15	19.4252	1.44446	0.26635	5.42316	5.86e-08	4.38e-05	51.9206	0.630244	2.14218	0.0260031
PSAT1	959.407	-0.974338	0.179159	-5.43839	5.38e-08	4.38e-05	654.132	1396.51	14.3557	30.648
EED	308.467	-0.857968	0.165047	-5.19834	2.01e-07	0.000126868	228.417	439.019	4.46646	8.58454
HMOX1	1077.91	1.3154	0.252162	5.2165	1.82e-07	0.000126868	1979.74	581.261	61.6465	18.0997
ZMYM3	1078.02	-0.670065	0.128686	-5.20698	1.92e-07	0.000126868	944.362	1541.06	7.11656	11.6132
GTPBP3	195.348	-1.06727	0.206106	-5.17826	2.24e-07	0.000134888	121.461	290.636	2.1182	5.06853
TMEM200B	59.4749	-1.23123	0.239143	-5.14853	2.63e-07	0.000151247	24.9934	77.762	0.473026	1.47173
PTP4A1	4078.65	0.777177	0.151946	5.11482	3.14e-07	0.000166441	4813.83	2686.01	46.8334	26.132
CTSL	2847.61	0.539007	0.105232	5.12208	3.02e-07	0.000166441	3384.88	2298.17	97.7755	66.3848
NET1	1336.31	-0.729282	0.143036	-5.09859	3.42e-07	0.000174382	1075.34	1846.97	12.2787	21.0896
SIN3A	1331.6	-0.598391	0.118063	-5.06841	4.01e-07	0.000196864	1157.94	1786.89	8.20059	12.6548
FBN1	12772.2	-0.804855	0.159265	-5.05355	4.34e-07	0.000205223	10184.7	18720	43.1167	79.2506
SEC11C	485.777	0.963591	0.191189	5.03999	4.66e-07	0.000212713	547.613	253.819	32.9436	15.2694
RBFOX2	4099.09	-0.542266	0.10776	-5.03216	4.85e-07	0.000214197	3629.83	5361.59	12.5132	18.4831
NXPH2	25.9105	-1.40609	0.280801	-5.00742	5.52e-07	0.000235784	10.5296	53.0708	0.203643	1.02639
KIAA0355	649.877	-0.721512	0.145101	-4.9725	6.61e-07	0.000273679	552.813	944.782	2.82632	4.8303
MGEA5	4205.5	0.420881	0.0849629	4.9537	7.28e-07	0.000292367	4560.06	3383.59	43.4008	32.2037
FBXO46	229.037	-0.830255	0.167832	-4.94694	7.54e-07	0.000293803	181.365	341.082	3.00317	5.64788
TMEM158	1855.06	0.868204	0.1763	4.92459	8.45e-07	0.000320037	1330.66	675.772	35.4392	17.9978
FAM111B	483.918	-1.25626	0.257213	-4.88412	1.04e-06	0.000381955	243.955	816.799	3.39088	11.3532
HNRNPDL	4441.73	-0.634943	0.13014	-4.87894	1.07e-06	0.000381955	3538.31	5635.39	41.2682	65.7269
LOXL1-AS1	522.264	-0.782435	0.160706	-4.86875	1.12e-06	0.000391596	408.573	738.926	7.11276	12.8638
SP1	1502.25	-0.653174	0.136222	-4.79493	1.63e-06	0.000552866	1335.15	2159.83	8.58718	13.8912
PEG10	3502.23	-0.899216	0.187851	-4.78685	1.69e-06	0.000561213	2631.58	5346.4	19.6576	39.9371
BTG2	150.834	1.32912	0.278737	4.76837	1.86e-06	0.0005856	302.129	69.6826	5.51772	1.2726
KRT80	1377.28	-0.787041	0.165097	-4.76716	1.87e-06	0.0005856	1077.35	1962.75	13.6981	24.9555
PRR12	719.181	-0.703596	0.147698	-4.76373	1.9e-06	0.0005856	601.78	1016.91	4.29129	7.25159
DLEU2	133.633	0.846604	0.178267	4.74908	2.04e-06	0.000615351	149.506	77.2347	2.67418	1.38148
OAS2	44.3738	1.34882	0.286455	4.70866	2.49e-06	0.000734189	107.153	21.015	0.859978	0.16866
FLOT2	1539.1	-0.818879	0.174745	-4.68614	2.78e-06	0.000798533	1200.11	2258.24	22.5752	42.4798
IL11	673.334	0.910454	0.194433	4.6826	2.83e-06	0.000798533	667.848	321.308	13.9047	6.6897
CRYM	25.366	1.30213	0.27921	4.66362	3.11e-06	0.000857665	49.5219	11.5297	1.57271	0.366157
MAP1LC3B	3017.75	0.489034	0.105059	4.65485	3.24e-06	0.000874281	3318.99	2335.73	71.8203	50.5434
HMGXB4	616.68	-0.77419	0.166447	-4.65126	3.3e-06	0.000874281	466.025	841.705	5.42769	9.80317
PPP4R3A	1619.44	0.587064	0.126524	4.63996	3.48e-06	0.000905366	1826.39	1189.31	19.6023	12.7647
FAM102A	1050.25	0.693934	0.150733	4.60374	4.15e-06	0.00105739	1401.46	833.295	16.0025	9.51495
TNFRSF1B	94.3005	-1.20395	0.262401	-4.5882	4.47e-06	0.00111077	57.8898	183.877	0.779906	2.47724
ADAMTS15	326.652	-1.02341	0.223179	-4.5856	4.53e-06	0.00111077	255.802	603.507	2.23131	5.26426
AHDC1	815.722	-0.719013	0.157555	-4.56358	5.03e-06	0.00111695	708.149	1216.87	5.51444	9.47592
BORA	598.647	0.957825	0.209178	4.57899	4.67e-06	0.00111695	678.262	306.894	10.5303	4.76465
THBS1	28941.1	-0.899192	0.197089	-4.56237	5.06e-06	0.00111695	22717.6	46648.9	155.268	318.831
RNFT1	184.171	0.733019	0.160583	4.56473	5e-06	0.00111695	227.138	130.105	5.57824	3.19523
VCAN	28997	-0.888912	0.194631	-4.56716	4.94e-06	0.00111695	23236.5	47161.8	92.6587	188.064
CASP8AP2	441.428	-0.736443	0.161211	-4.5682	4.92e-06	0.00111695	350.087	612.152	2.56291	4.48144
OASL	15.1103	1.28285	0.281516	4.55692	5.19e-06	0.00112754	37.2359	4.77078	0.884205	0.113287
VIMP	1089.64	0.60064	0.132157	4.54491	5.5e-06	0.0011745	1076.38	692.208	26.6594	17.1444
AURKA	3881.62	1.00528	0.221855	4.53123	5.86e-06	0.00121406	4326.53	1830.05	84.1024	35.5739
TPD52L2	4087.99	0.449651	0.0992251	4.53162	5.85e-06	0.00121406	4130.35	2994.38	84.224	61.0599
ISG15	340.53	1.17625	0.260695	4.51199	6.42e-06	0.00125136	647.049	209.19	48.1017	15.5512
C1orf43	4552.28	0.459491	0.101749	4.51594	6.3e-06	0.00125136	5163.62	3715.13	92.5274	66.5719
SMG1P3	154.075	0.998419	0.221135	4.51498	6.33e-06	0.00125136	150.646	63.6894	1.47636	0.624168
PTK7	2806.32	-0.542875	0.120092	-4.52047	6.17e-06	0.00125136	2517.94	3734.41	28.0397	41.5862
TOPBP1	992.438	-0.840838	0.187255	-4.49033	7.11e-06	0.00134604	694.638	1349.14	6.4332	12.4947
DYNLT3	954.116	0.611673	0.136195	4.49116	7.08e-06	0.00134604	1104.93	703.423	24.6867	15.7161
SMARCC2	2350.87	-0.64865	0.144589	-4.48616	7.25e-06	0.00135334	1950.3	3159.22	16.997	27.5329
CLIC1	10485.3	0.391466	0.08769	4.4642	8.04e-06	0.00147898	10667	8077.82	42.5294	32.2062
PVRL4	12.5987	1.24594	0.28137	4.42813	9.51e-06	0.0017253	26.7367	2.47391	0.377998	0.0349755
HSPG2	2350.83	-0.772266	0.174625	-4.42242	9.76e-06	0.00174757	1738.58	3158.92	6.00139	10.9042
FOXJ2	718.042	-0.725806	0.164547	-4.41094	1.03e-05	0.00181832	576.299	1000.99	5.20482	9.04045
ILF3-AS1	164.129	-0.774236	0.176468	-4.38739	1.15e-05	0.00200002	137.453	249.127	3.38408	6.13348
ACACB	88.7674	-0.867256	0.198539	-4.36818	1.25e-05	0.00215588	64.6753	129.494	0.346211	0.693187
PMEPA1	676.435	-0.84369	0.193383	-4.36279	1.28e-05	0.00218139	566.18	1104.58	5.081	9.91267
DHRS11	78.2906	-1.04057	0.238749	-4.35845	1.31e-05	0.00219698	51.0502	128.495	0.79084	1.99057
JMJD6	658.668	0.597965	0.138077	4.33064	1.49e-05	0.0024624	694.979	446.607	6.02289	3.87043
BTG3	1081.43	0.516807	0.119456	4.32635	1.52e-05	0.00247994	1038.83	713.676	22.3426	15.3495
AGTRAP	1080.63	0.528737	0.122388	4.32017	1.56e-05	0.00248891	1217.25	828.189	47.0832	32.0344
NECAP2	1685.4	0.409833	0.0948525	4.32074	1.56e-05	0.00248891	1843.47	1376.32	43.8592	32.745
CDK2AP2	1035.49	0.480268	0.112068	4.28551	1.82e-05	0.0028759	1088.13	768.941	30.0467	21.2329
VGF	29.4265	1.18179	0.276076	4.28067	1.86e-05	0.00290453	44.4475	11.5632	0.861974	0.224245
AKAP1	521.276	-0.66746	0.156171	-4.27391	1.92e-05	0.00292696	395.219	654.11	4.19543	6.94368
STC1	5412.62	0.590207	0.1381	4.27378	1.92e-05	0.00292696	5366.07	3468.55	68.5265	44.2945
LAMC1	10229.2	-0.48582	0.1143	-4.25039	2.13e-05	0.00321314	9439.6	13411.4	59.2419	84.1684
SIX1	656.539	-0.764889	0.180615	-4.2349	2.29e-05	0.00340404	569.038	1030.32	10.4851	18.9846
MYRF	260.147	-0.814886	0.192609	-4.23078	2.33e-05	0.00342858	201.781	385.075	1.66616	3.17966
MYB	32.8363	-1.17175	0.277767	-4.21845	2.46e-05	0.00358164	17.2462	62.2866	0.232156	0.838457
KIF18A	1356.2	0.863502	0.205408	4.20384	2.62e-05	0.00372884	1406.47	691.961	20.1083	9.89296
MALAT1	2914.51	0.901317	0.214979	4.19259	2.76e-05	0.00372884	3436.76	1614.26	19.4442	9.133
SCG5	1886.15	0.72604	0.173159	4.19291	2.75e-05	0.00372884	2064.66	1177.75	41.0861	23.4368
ZNF587	416.225	-0.605538	0.144062	-4.20332	2.63e-05	0.00372884	348.223	545.954	2.48532	3.89657
DLX1	106.765	-0.8748	0.208386	-4.19797	2.69e-05	0.00372884	82.7398	168.366	1.71977	3.49954
ADAMTS12	2807.34	-0.726396	0.172928	-4.20056	2.66e-05	0.00372884	2308.86	4039.54	23.0702	40.3632
PRR3	210.671	-0.74706	0.178053	-4.19572	2.72e-05	0.00372884	180.048	319.976	0.374109	0.664856
PASK	237.483	-0.847578	0.202319	-4.18932	2.8e-05	0.00374463	159.697	318.64	1.27036	2.53471
CABYR	140.205	0.725762	0.173511	4.1828	2.88e-05	0.00381526	165.19	94.063	3.4021	1.93723
NRDE2	226.83	-0.657375	0.157556	-4.17231	3.02e-05	0.00387291	190.62	313.22	2.35353	3.86726
SEMA4C	559.99	-0.644022	0.154425	-4.17046	3.04e-05	0.00387291	496.854	805.038	6.92553	11.2212
SRXN1	2008.49	0.523144	0.125265	4.1763	2.96e-05	0.00387291	2099.46	1432.83	38.6558	26.3816
TREX1	263.969	-0.705285	0.168972	-4.17397	2.99e-05	0.00387291	231.29	395.656	5.3863	9.21409
TFAP4	97.5865	-0.942258	0.226647	-4.15739	3.22e-05	0.00406221	67.4261	151.438	1.55995	3.50364
IFIT2	382.655	1.02004	0.245941	4.14749	3.36e-05	0.00417657	720.062	288.641	10.2005	4.08892
SETD1B	603.115	-0.653247	0.157534	-4.14672	3.37e-05	0.00417657	515.859	843.498	3.11659	5.09604
FAM64A	1279.56	0.881881	0.21285	4.1432	3.42e-05	0.00420196	1419.68	679.775	45.5239	21.7979
PYGO2	783.674	-0.676806	0.163979	-4.12739	3.67e-05	0.00446013	674.538	1127.95	10.5021	17.5615
CCNYL1	704.068	0.533974	0.129662	4.11819	3.82e-05	0.00459965	726.984	491.675	9.2031	6.22427
MDM2	2397.21	0.961872	0.233848	4.11323	3.9e-05	0.00461573	3676.68	1583.16	24.0627	10.3613
IMPDH2	5094.79	-0.426216	0.1036	-4.11406	3.89e-05	0.00461573	4231.17	5744.84	123.884	168.202
SNHG10	89.9724	-0.759368	0.184858	-4.10784	3.99e-05	0.00464195	75.4434	136.068	1.90476	3.43539
MED10	606.923	0.567889	0.138232	4.10823	3.99e-05	0.00464195	651.503	428.15	31.3777	20.6206
BCYRN1	595.326	-0.695302	0.169527	-4.10142	4.11e-05	0.00473107	463.549	790.262	114.753	195.631
SLC25A38	844.684	0.460875	0.112884	4.08274	4.45e-05	0.00508397	926.897	664.502	21.606	15.4896
ITGB1BP1	1486.1	0.494387	0.121343	4.07431	4.62e-05	0.00522644	1534.77	1071.18	39.4124	27.5076
UNK	602.467	-0.491068	0.120905	-4.06158	4.87e-05	0.00547304	526.267	752.029	5.16467	7.38025
KIRREL	4051.06	-0.421595	0.104095	-4.05011	5.12e-05	0.00555991	3576.11	4839.41	22.6413	30.6396
SNHG19	240.512	-1.01578	0.250791	-4.0503	5.12e-05	0.00555991	177.606	447.755	24.6313	62.0968
CCNE1	70.1215	-0.988582	0.243971	-4.05204	5.08e-05	0.00555991	47.4929	115.748	1.2077	2.94336
CPNE1	2179.36	-0.555538	0.137151	-4.05055	5.11e-05	0.00555991	1921.08	2893.37	36.1511	54.4478
BLZF1	499.886	0.595509	0.147359	4.04121	5.32e-05	0.0056003	552.196	354.123	11.8046	7.5703
NAV1	4832.95	-0.564985	0.140072	-4.03352	5.49e-05	0.0056003	4158.04	6316.68	15.5195	23.5765
GLTP	1708.95	0.483354	0.119614	4.04096	5.32e-05	0.0056003	1767.25	1243.69	37.1382	26.1356
SOX9	2085.8	-0.600745	0.148704	-4.03987	5.35e-05	0.0056003	1904.38	2981.46	23.9671	37.5225
SAMD1	393.018	-0.58279	0.144392	-4.03618	5.43e-05	0.0056003	330.291	509.093	12.5888	19.4037
ZNF217	767.77	-0.463284	0.114729	-4.03808	5.39e-05	0.0056003	739.414	1032.66	6.49667	9.07318
NUP210	1117.55	-0.868777	0.214817	-4.04426	5.25e-05	0.0056003	763.378	1575.68	5.24351	10.8231
RBM5	1195.94	-0.68007	0.168565	-4.03446	5.47e-05	0.0056003	1009.47	1698.03	15.9627	26.8509
LRP4	229.366	-0.580143	0.144345	-4.01914	5.84e-05	0.00588454	196.591	302.474	1.18309	1.82031
PAGR1	920.723	-0.535919	0.133429	-4.01651	5.91e-05	0.00588454	751.522	1115.2	9.72765	14.4351
BST2	16.3747	1.12558	0.280223	4.01673	5.9e-05	0.00588454	39.5913	6.64612	1.92364	0.322918
PRR13	1694.67	0.418049	0.104184	4.01261	6.01e-05	0.00593165	1851.12	1371.59	76.6945	56.8267
ODC1	8070.09	0.585579	0.14599	4.0111	6.04e-05	0.00593165	7720.15	4988.23	145.556	94.0479
PEAK1	1084.1	-0.623691	0.155818	-4.0027	6.26e-05	0.00599879	924.685	1479.22	3.87422	6.19757
MPC1	316.205	0.55997	0.139926	4.0019	6.28e-05	0.00599879	342.484	226.456	11.8827	7.85701
ADAM22	312.858	-0.528572	0.131935	-4.00629	6.17e-05	0.00599879	276.743	407.733	1.44077	2.12272
CHRAC1	493.012	-0.716874	0.179149	-4.00154	6.29e-05	0.00599879	374.423	654.131	7.27545	12.7105
LPCAT4	472.903	-0.677325	0.169845	-3.98789	6.67e-05	0.00626436	390.703	656.286	10.1383	17.0299
MCM6	1339.21	-0.867161	0.217411	-3.98858	6.65e-05	0.00626436	889.213	1842.51	11.6254	24.0886
CBX5	4644.53	-0.945736	0.238147	-3.97124	7.15e-05	0.00661133	3020.38	7000.82	12.6003	29.2058
PDRG1	563.591	0.453501	0.11423	3.97007	7.19e-05	0.00661133	585.646	421.876	21.1184	15.2129
KCTD9	1431.18	0.465779	0.117233	3.97309	7.09e-05	0.00661133	1469.22	1048.14	21.3883	15.2585
RTCA	949.901	0.455293	0.11478	3.96664	7.29e-05	0.00666086	1006.68	724.182	19.0016	13.6693
ADAMTS3	196.483	-0.623256	0.157925	-3.94654	7.93e-05	0.00719574	181.368	290.015	1.54236	2.4663
HMCN1	650.364	-0.826477	0.209513	-3.94474	7.99e-05	0.00720053	537.508	1057.29	1.46125	2.87432
L2HGDH	229.931	-0.607969	0.154584	-3.93293	8.39e-05	0.00751272	182.981	289.664	1.48638	2.35298
IFIT1	683.21	1.12238	0.285555	3.93052	8.48e-05	0.00753768	1450.96	377.184	15.1942	3.94978
SKI	1837.99	-0.596043	0.151839	-3.92551	8.65e-05	0.00764505	1612.72	2520.42	13.991	21.8656
NUP153	1173.56	-0.712417	0.182195	-3.91018	9.22e-05	0.00809277	892.608	1558.34	7.32894	12.795
ARHGEF11	947.156	-0.675116	0.172952	-3.9035	9.48e-05	0.00820963	826.017	1388.43	5.9365	9.97849
NUPR1	952.271	0.629653	0.161368	3.90196	9.54e-05	0.00820963	1293.31	802.196	70.2111	43.5495
MTCL1	702.477	-0.667758	0.171105	-3.90263	9.52e-05	0.00820963	523.907	876.356	4.25787	7.12227
LINC00641	239.323	-0.629344	0.161365	-3.90013	9.61e-05	0.00821867	167.109	269.889	1.44771	2.33812
ARID3B	113.409	-0.820608	0.210839	-3.8921	9.94e-05	0.00844094	75.9788	149.636	0.880147	1.7334
IMPA1	907.925	0.531772	0.136821	3.88663	0.000101644	0.00857826	1016.77	686.848	13.9953	9.45404
NCSTN	3032.63	-0.553409	0.142678	-3.87871	0.00010501	0.00879417	2780.99	4191.92	44.7913	67.516
SENP1	463.467	-0.680433	0.175482	-3.87751	0.00010553	0.00879417	367.84	622.644	3.36076	5.68877
PRIM1	245.457	-0.847679	0.218833	-3.87364	0.000107223	0.0088794	164.199	336.289	5.56058	11.3884
ZNF362	465.693	-0.535927	0.138474	-3.87024	0.00010873	0.00891129	427.757	634.912	6.81856	10.1207
MGAT2	2265.98	0.451345	0.116635	3.86974	0.000108953	0.00891129	2326.59	1677.85	42.4901	30.6422
FNBP1L	835.798	-0.49748	0.128611	-3.86809	0.000109692	0.00891672	786.574	1131.09	7.05885	10.1506
UBE2Q2	1285.32	0.41864	0.108498	3.85851	0.000114082	0.00921699	1376.16	1018.22	19.247	14.2408
CAB39	2119.34	0.407281	0.105671	3.85425	0.000116086	0.00928925	2298.46	1715.29	26.2207	19.5679
AKIRIN2	1057.27	0.530503	0.137663	3.85363	0.000116379	0.00928925	1161.56	785.004	29.7667	20.1169
SNORD36A	26.2492	-1.04079	0.270873	-3.84237	0.000121852	0.0096679	12.9974	39.3433	8.93764	27.0542
LSM11	137.89	-0.764806	0.199299	-3.83748	0.000124303	0.00980369	99.3835	184.442	0.747346	1.38697
CORO1A	52.997	-0.89058	0.232981	-3.82254	0.000132082	0.0101783	31.3854	69.4462	0.803884	1.77875
PIK3R2	1897.89	-0.586188	0.153232	-3.8255	0.000130506	0.0101783	1622.22	2519.3	20.0043	31.0665
FTL	27625.6	0.509986	0.133325	3.82513	0.000130703	0.0101783	35313.1	24272	2007.31	1379.7
SPATA18	92	1.06954	0.279804	3.82246	0.000132126	0.0101783	170.864	51.7925	1.89677	0.574949
PTPRS	1512.83	-0.437852	0.114918	-3.81011	0.000138904	0.0105775	1421.5	1951.3	9.57931	13.1496
CLDN12	1383.3	0.409261	0.107383	3.81123	0.000138274	0.0105775	1445.57	1077.04	19.5335	14.5537
SPIN4	294.158	-0.878497	0.230766	-3.80687	0.000140737	0.0106558	205.085	440.009	2.46933	5.29793
TAF13	589.177	0.616614	0.162156	3.80261	0.00014318	0.0107791	636.708	398.496	54.6339	34.1937
SNX7	1187.58	0.441075	0.116342	3.7912	0.000149922	0.0110976	1326.97	963.835	34.633	25.1555
MZT1	1856.12	0.589459	0.155402	3.79312	0.000148765	0.0110976	1932.97	1239.53	39.6776	25.4436
STARD4-AS1	108.93	-0.845745	0.223061	-3.79154	0.000149719	0.0110976	80.4558	164.419	0.720978	1.47339
CARD10	480.942	-0.706322	0.186441	-3.78845	0.000151591	0.0111588	378.985	660.564	4.81245	8.38801
ZNF300	182.135	-0.615166	0.162579	-3.7838	0.000154453	0.0113066	144.572	230.66	2.15403	3.43667
GTPBP1	918.87	-0.614508	0.162492	-3.78178	0.000155711	0.0113361	762.959	1216.72	7.48455	11.9359
SAMD9	131.406	0.640757	0.169631	3.77735	0.000158503	0.0114763	186.149	114.058	1.34447	0.823788
CDYL	612.917	0.571303	0.151587	3.76882	0.000164019	0.0118112	634.403	413.244	7.6163	4.96118
ADGRE5	704.919	-0.618516	0.164275	-3.76513	0.000166461	0.0118359	574.073	919.508	8.13936	13.037
SLC29A1	2262.36	-0.777152	0.206455	-3.76426	0.000167043	0.0118359	1823.58	3435.84	30.2467	56.9884
CREB3	1621.75	0.413028	0.109708	3.76479	0.000166688	0.0118359	1707.34	1267.7	45.6679	33.9085
APEX2	409.024	-0.816042	0.216968	-3.76111	0.000169162	0.0119223	292.798	579.675	6.91961	13.6993
MAML2	609.463	-0.590966	0.15725	-3.75813	0.000171188	0.0119381	564.194	879.89	3.92822	6.12626
PLXNA4	1888.67	-0.67611	0.179864	-3.759	0.000170592	0.0119381	1634.04	2763.87	5.24928	8.87884
SOX13	131.012	-0.72488	0.192999	-3.75588	0.000172735	0.0119829	109.091	193.236	1.32609	2.34894
FOPNL	1585.45	0.535112	0.142643	3.75139	0.000175854	0.0121358	1719.62	1155.91	17.6638	11.8734
SLC38A2	12542.9	-0.635738	0.169913	-3.74154	0.000182896	0.0125042	11554.3	18804.4	117.129	190.626
INSR	251.723	-0.619056	0.16554	-3.73961	0.000184304	0.0125042	217.686	348.149	1.18973	1.90275
DGCR8	664.931	-0.603987	0.161533	-3.7391	0.00018468	0.0125042	541.738	856.923	5.93401	9.38643
CYSTM1	724.858	0.505615	0.135238	3.73871	0.000184968	0.0125042	826.678	569.237	44.9772	30.9706
RCCD1	279.433	-0.570324	0.1529	-3.73005	0.000191444	0.0127815	221.777	340.168	3.9683	6.0867
ZSWIM4	351.129	-0.542356	0.14533	-3.7319	0.00019004	0.0127815	308.741	461.905	3.52292	5.2706
SLC5A3	1835.93	-0.499619	0.134014	-3.7281	0.000192928	0.0127815	1841.02	2657.1	7.84219	11.3184
KANK1	506.7	-0.671243	0.180032	-3.72846	0.000192654	0.0127815	425.814	717.93	3.14848	5.3084
ZNF189	327.758	0.477969	0.128621	3.7161	0.00020232	0.013337	379.798	267.8	5.44728	3.84093
HIST1H2BC	55.3586	1.0446	0.281316	3.71326	0.000204604	0.0134208	94.2377	27.8907	10.6524	3.1527
RNF145	3819.68	0.506111	0.136696	3.70245	0.000213525	0.013937	4477.87	3082.39	51.415	35.3921
RMI2	263.91	-0.9029	0.244805	-3.68825	0.000225805	0.0146662	173.52	395.101	5.92077	13.4815
NUF2	1940.43	0.657024	0.178381	3.68326	0.000230272	0.0147396	1960.53	1174.87	48.802	29.2451
MPP3	250.588	0.757096	0.205496	3.68423	0.000229392	0.0147396	217.589	116.487	3.79998	2.03433
DPYSL3	9605.59	-0.425542	0.115521	-3.68367	0.000229902	0.0147396	8321.98	11324.1	73.1969	99.6021
MYADM	1991.79	-0.773914	0.210412	-3.67809	0.000234989	0.0149692	1468.04	2779.27	17.3427	32.833
BCL9	490.879	-0.535762	0.145786	-3.675	0.000237849	0.0150266	454.183	675.631	3.63159	5.40226
TLE3	1264.6	-0.616783	0.167847	-3.67467	0.000238157	0.0150266	1161.97	1860.3	9.73432	15.5845
HSD17B11	772.627	0.452377	0.123235	3.67084	0.000241753	0.0151812	882.426	634.627	23.1528	16.6511
STRIP1	586.006	-0.655395	0.178714	-3.66728	0.000245147	0.0153217	485.781	807.926	6.95526	11.5676
UFM1	1588.58	0.558765	0.152837	3.65595	0.000256234	0.0159394	1787.45	1174.6	25.0064	16.4326
KNSTRN	2753.79	0.742727	0.203428	3.65106	0.000261163	0.0161701	2804.95	1528.56	68.3102	37.2257
LRPPRC	2304.03	-0.541287	0.148445	-3.64637	0.000265971	0.0163913	1957.2	2932.53	14.64	21.9355
LOC100419583	565.567	0.585675	0.161064	3.63629	0.000276591	0.0169668	696.216	446.279	8.39095	5.37865
XYLT2	1271.79	-0.435139	0.119731	-3.6343	0.00027874	0.0170198	1152.88	1581.05	15.851	21.7381
ARPIN	607.536	-0.585636	0.161207	-3.63281	0.000280348	0.0170395	495.54	773.046	3.64283	5.68284
IFIT3	1065.25	0.862473	0.237683	3.62867	0.000284885	0.0171665	1812.18	849.922	31.6034	14.8221
SMARCAD1	1016.96	-0.548829	0.151302	-3.62737	0.000286325	0.0171665	900.742	1358.6	7.55484	11.3951
DBF4	1011.84	0.741516	0.204382	3.62809	0.000285521	0.0171665	1072.07	584.374	13.5856	7.40533
MAP2K6	38.8076	-0.98853	0.272862	-3.62282	0.000291412	0.0172426	27.0254	73.3253	0.715913	1.94241
BMP2	253.631	0.96849	0.267336	3.62274	0.000291497	0.0172426	370.335	136.97	5.82078	2.15285
SH3TC2	344.157	-0.672295	0.185533	-3.62358	0.000290551	0.0172426	273.684	464.118	0.50979	0.864511
MIIP	264.882	0.602561	0.166382	3.62156	0.000292832	0.0172446	283.783	179.042	7.80135	4.92196
LYPD6	60.2452	-0.844962	0.233613	-3.61693	0.000298116	0.0173247	43.3671	90.9671	0.498405	1.04546
DNAJB2	1424.5	0.564858	0.156131	3.61784	0.000297069	0.0173247	1672.51	1091.87	26.4982	17.2989
UGDH	2765.26	0.445273	0.123076	3.61787	0.00029704	0.0173247	2940.84	2126.15	45.5577	32.9371
ZBED6	382.349	-0.678878	0.187994	-3.61117	0.00030482	0.0175337	329.023	561.303	5.54085	9.45251
CCNT1	723.957	-0.548772	0.15192	-3.61224	0.000303569	0.0175337	634.675	957.351	4.43891	6.69571
SLC35F5	1354.15	0.445339	0.123348	3.61044	0.000305682	0.0175337	1418.93	1026.03	14.2585	10.3104
DANCR	757.028	-0.44946	0.124565	-3.60823	0.000308295	0.0176074	657.284	911.784	38.0614	52.7987
CD63	19115.2	0.317343	0.0880459	3.60429	0.000313012	0.0176485	21026.3	16782.7	505.352	403.359
SEC14L1	2472.66	-0.418937	0.116213	-3.60491	0.000312258	0.0176485	2262.44	3064.5	17.9366	24.2954
FAT4	613.239	-0.807649	0.224079	-3.60431	0.000312987	0.0176485	509.16	1007.86	1.56421	3.09627
ARSK	311.442	-0.536808	0.149126	-3.5997	0.000318589	0.0178114	270.292	403.505	4.00068	5.97242
DAXX	1946.54	0.394745	0.109649	3.60009	0.000318104	0.0178114	1991.24	1498.35	7.53782	5.67201
PAPPA	1267.34	-0.717601	0.199418	-3.59848	0.000320078	0.0178195	1134.09	2016.26	5.11845	9.09992
CELSR2	1171.17	-0.696218	0.193741	-3.59356	0.000326191	0.0180838	973.663	1695	4.57368	7.96207
PLCE1	896.697	-0.670319	0.186825	-3.58796	0.000333281	0.0182	673.939	1143.99	3.99989	6.78966
ARF3	5129.53	-0.530967	0.147907	-3.58987	0.000330838	0.0182	4500.32	6688.36	62.9949	93.6228
HSPA2	184.625	-0.728097	0.20295	-3.58756	0.000333781	0.0182	137.363	248.172	2.45608	4.43739
TP53BP1	1992.76	-0.427306	0.119059	-3.58902	0.00033192	0.0182	1870.62	2550.54	14.5713	19.8676
CHD1	581.949	-0.609494	0.169982	-3.58564	0.00033625	0.0182165	455.148	727.095	3.48995	5.57517
XIST	1670.81	-0.86893	0.242366	-3.58519	0.000336833	0.0182165	1137.89	2490.08	2.92207	6.39446
IKBIP	1902.21	0.557864	0.155895	3.57845	0.000345633	0.0184351	1958.8	1285.88	23.6597	15.5317
TXNL4B	283.714	0.493605	0.137961	3.57784	0.000346441	0.0184351	323.972	224.963	5.55211	3.85532
USP37	273.928	-0.692523	0.193529	-3.57839	0.000345716	0.0184351	218.841	380.036	1.34897	2.3426
SENP6	1664.52	0.409887	0.114534	3.57875	0.000345244	0.0184351	1773.43	1318.62	10.9947	8.17502
PDPR	1714.94	-0.578051	0.161703	-3.57478	0.000350529	0.018578	1431.05	2219.59	8.85763	13.7383
DDX17	5455.48	-0.507695	0.14211	-3.57254	0.000353529	0.0186624	4807.41	7005.27	49.6283	72.3175
PPP1R9B	2068.97	-0.52979	0.148598	-3.56526	0.000363497	0.0190378	1921.98	2853.45	23.4727	34.8485
C7orf26	352.923	0.53952	0.151327	3.56525	0.000363514	0.0190378	395.51	264.118	8.99077	6.00396
CREG1	481.752	0.549146	0.154327	3.55832	0.000373231	0.0194648	600.824	397.551	14.6899	9.71999
TUBB2B	42.9905	0.911073	0.25611	3.55736	0.000374606	0.0194648	69.711	29.3953	1.70947	0.720839
MAP1B	3548.72	-0.85297	0.240423	-3.54779	0.000388471	0.0201064	2385.85	5125.31	9.86096	21.1835
CARHSP1	1805.21	-0.426651	0.120295	-3.54671	0.000390078	0.020111	1615.97	2202.98	21.5017	29.3122
PNRC2	2242.85	0.467962	0.132091	3.54271	0.000396035	0.0202104	2403.17	1704.29	49.2884	34.9546
ARID1A	1387.29	-0.716733	0.202343	-3.54217	0.000396845	0.0202104	1048.29	1874.75	6.04559	10.8118
PHC1	412.994	-0.567296	0.160193	-3.54134	0.000398106	0.0202104	351.015	539.167	3.3576	5.15735
AREL1	1507.58	-0.593912	0.167658	-3.54239	0.000396518	0.0202104	1288.64	2029.21	11.7174	18.4513
RBBP4	2629.42	-0.461805	0.130587	-3.53637	0.000405661	0.0205153	2350.86	3298.57	14.5163	20.3684
AHCY	3837.31	-0.36115	0.102176	-3.53457	0.000408439	0.0205773	3345.54	4334.3	65.2637	84.5521
SIX3	1669.13	-0.620202	0.175556	-3.53279	0.000411199	0.020625	1590.04	2564.89	31.2024	50.3326
SPP1	3256.86	0.518369	0.146766	3.53195	0.000412501	0.020625	4330.94	2943.07	118.207	80.3267
HIST1H2BD	49.7917	1.00938	0.285935	3.53009	0.000415423	0.0206931	89.7495	24.4293	5.16091	1.40477
IGF2BP2	945.451	-0.54703	0.155179	-3.52516	0.000423223	0.0209352	736.391	1111.82	9.57182	14.4518
ARPC5L	1268.14	0.578548	0.164126	3.52502	0.000423444	0.0209352	1193.09	767.315	57.6296	37.0636
CEP55	6004.89	0.727096	0.206616	3.51906	0.000433073	0.0212526	5874.49	3227.53	109.424	60.1192
COL12A1	9884.97	-0.693712	0.197075	-3.52004	0.000431482	0.0212526	7850.92	13694.4	33.5697	58.5558
FAM160B1	1245.83	-0.523736	0.148906	-3.51722	0.000436095	0.0213132	1100.03	1626.51	8.86153	13.1027
RHOJ	689.57	-0.490743	0.13956	-3.51635	0.000437523	0.0213132	621.79	893.692	8.50653	12.2263
GTF2A2	1252.87	0.441232	0.125619	3.51247	0.000443957	0.0215473	1337.06	969.015	41.8448	30.3264
AGO1	851.399	-0.511753	0.145778	-3.51049	0.00044728	0.0216294	733.551	1073.79	4.85671	7.10938
GREB1	41.8315	0.962	0.274373	3.50618	0.000454593	0.0219031	74.6682	27.2044	0.357911	0.1304
MYC	1279.56	-0.616	0.175923	-3.50154	0.000462584	0.0222074	961.329	1549.86	20.1166	32.4321
ADAM19	2957.27	-0.611342	0.174781	-3.49775	0.000469204	0.0224439	2512.25	4027.97	19.0508	30.5448
MTHFD2	1250.41	-0.598743	0.171254	-3.49624	0.000471873	0.0224903	913.407	1448.67	19.7914	31.3893
IRF9	463.089	0.653879	0.187201	3.49293	0.000477747	0.0225116	706.121	422.273	20.8222	12.452
LOC100131315	33.6994	0.933745	0.267383	3.49217	0.000479114	0.0225116	46.5696	17.5917	1.97067	0.744422
HIST1H2BK	630.321	0.772261	0.221139	3.4922	0.000479067	0.0225116	938.409	489.017	55.3768	28.8576
CKS2	4440.99	0.721774	0.206621	3.49323	0.00047721	0.0225116	4658.18	2572.44	374.398	206.758
ATXN7L3B	1479.73	-0.552984	0.158616	-3.48631	0.000489732	0.0229018	1358.66	2062.08	18.2694	27.728
COX10-AS1	70.2397	-0.733656	0.210534	-3.48475	0.000492605	0.0229018	54.8347	100.109	1.39655	2.54961
FAM120C	284.155	-0.607805	0.174393	-3.48525	0.000491675	0.0229018	251.762	401.786	1.47671	2.35666
FTH1	60189.3	0.51214	0.147151	3.48037	0.000500724	0.0230593	73603.6	50231.9	2965.14	2023.6
CDK8	341.323	0.5293	0.152093	3.48011	0.000501213	0.0230593	356.369	239.545	9.97401	6.70435
PP7080	261.859	-0.477435	0.137132	-3.48158	0.000498474	0.0230593	232.417	330.325	6.60187	9.383
BTG1	2335.86	0.473459	0.136192	3.47641	0.000508183	0.023299	2999.64	2115.52	31.7337	22.3804
TUSC2	585.917	0.433243	0.124712	3.47395	0.000512865	0.0234326	612.162	446.461	17.9979	13.1262
BARD1	278.379	-0.916072	0.263886	-3.47147	0.000517608	0.0234874	162.12	405.984	1.4578	3.65065
STX18	555.056	0.438364	0.126249	3.47221	0.000516197	0.0234874	602.94	437.735	13.8395	10.0475
BLOC1S2	1344.62	0.643917	0.185594	3.46949	0.000521442	0.0235004	1773.09	1068.48	29.8695	17.9996
ATP6V1G1	1722.77	0.442843	0.127615	3.47015	0.00052017	0.0235004	2006.8	1451.8	61.6746	44.6177
CDC20	6482.46	0.758688	0.219114	3.46252	0.000535137	0.0236723	6726.67	3532.5	198.949	104.478
CTC1	266.037	-0.7152	0.206543	-3.46271	0.000534755	0.0236723	198.566	356.039	1.39014	2.4926
TSEN34	842.038	-0.455631	0.13163	-3.46146	0.000537253	0.0236723	739.699	1033.33	1.33169	1.86033
SETD5	1461.54	-0.507087	0.146506	-3.46121	0.000537763	0.0236723	1300.72	1897.05	9.05756	13.2101
NIPBL-AS1	168.89	-0.585937	0.169083	-3.46539	0.000529468	0.0236723	152.455	237.93	1.4151	2.20848
C5orf42	542.601	-0.657093	0.189715	-3.46358	0.000533032	0.0236723	414.464	698.094	1.83234	3.08626
GPBP1	1484.23	0.451296	0.130276	3.46416	0.000531889	0.0236723	1632.04	1172.31	17.3995	12.4982
FHOD1	1312.69	-0.420017	0.121501	-3.45691	0.000546414	0.0239735	1148.82	1559.08	14.7583	20.0288
TMEM121	20.79	-0.981841	0.284165	-3.45517	0.000549942	0.0240486	10.836	35.9483	0.353191	1.1717
RBM23	1047.09	-0.633346	0.183423	-3.45293	0.000554536	0.0240905	908.898	1491.13	17.2811	28.3513
CAPN7	950.445	0.436045	0.126275	3.45312	0.000554133	0.0240905	1044.09	759.576	11.8345	8.60967
FAM109A	255.989	0.494215	0.143222	3.4507	0.00055913	0.0242107	304.459	211.058	4.62958	3.20934
EID2B	49.998	-0.762271	0.220989	-3.44937	0.000561902	0.0242515	38.5928	73.0533	1.43127	2.70929
PUM1	1825.25	-0.428047	0.124336	-3.44267	0.000576007	0.0246993	1674.29	2287.34	15.3937	21.0301
CYR61	13069.3	-0.796439	0.23129	-3.44346	0.000574324	0.0246993	7835.67	15744.2	169.188	339.949
R3HCC1L	486.928	0.459062	0.133605	3.43596	0.000590449	0.0250752	539.333	384.812	7.49022	5.34425
YIF1A	1287	0.40296	0.117245	3.4369	0.00058842	0.0250752	1327.75	991.155	58.6419	43.7757
EXOG	248.234	-0.556468	0.161934	-3.43639	0.000589526	0.0250752	218.553	333.218	3.4395	5.24405
SLC7A5P2	78.4947	0.953488	0.277588	3.4349	0.00059277	0.0250933	65.5866	20.2544	1.28045	0.395427
PEX11B	430.661	-0.601553	0.175541	-3.42685	0.000610635	0.0257673	393.478	624.987	8.1037	12.8716
LIAS	215.22	0.590806	0.172534	3.42429	0.000616403	0.025846	234.52	148.511	5.93013	3.75528
DRP2	41.6983	0.85624	0.250009	3.42484	0.00061517	0.025846	53.0717	23.6714	0.36915	0.164651
BEND7	316.151	0.546906	0.160142	3.41513	0.000637521	0.0266472	341.921	225.939	5.47145	3.6155
GLDC	262.246	-0.714452	0.209265	-3.41409	0.000639949	0.0266645	175.317	316.921	2.27882	4.11944
EEF2K	752.174	-0.605038	0.177426	-3.41009	0.000649417	0.0268899	630.084	1007.24	4.20882	6.72817
GIGYF1	921.491	-0.651403	0.191005	-3.41039	0.000648692	0.0268899	765.072	1281.74	5.985	10.0268
TLK2	1066.94	0.394596	0.115995	3.40183	0.000669353	0.0276291	1113.61	837.158	10.001	7.51825
MTMR14	757.411	0.384737	0.113131	3.40079	0.000671908	0.0276484	834.282	631.914	16.3587	12.3907
HN1	1446.57	-0.820557	0.241536	-3.39725	0.00068067	0.0278944	927.328	1945.96	14.8873	31.2404
TAP1	930.278	0.524427	0.154394	3.39668	0.000682097	0.0278944	1168.85	787.632	2.3001	1.54992
MCAM	18.4921	-0.964314	0.284072	-3.39462	0.000687248	0.0280186	10.144	32.513	0.15073	0.483113
NPIPB4	54.7945	0.833203	0.245848	3.3891	0.000701222	0.0285006	49.7528	22.4417	0.608369	0.274413
MYO18A	2258.43	-0.483062	0.142701	-3.38513	0.00071145	0.028763	2088.63	2989.24	13.637	19.5172
PCCB	750.035	-0.34809	0.102836	-3.38491	0.000712019	0.028763	689.143	884.122	18.1875	23.3333
WEE1	740.648	-0.73521	0.217281	-3.38369	0.000715194	0.0288034	547.01	1013.43	6.69205	12.3982
SPACA6P	102.302	-0.74481	0.220648	-3.37556	0.000736664	0.0295782	87.6937	162.738	2.21067	4.10248
ODF2L	489.679	0.451663	0.133978	3.37117	0.000748503	0.0298725	528.571	379.157	4.04417	2.90098
PRR14L	558.774	-0.645549	0.191469	-3.37155	0.000747462	0.0298725	463.609	773.44	2.11983	3.53652
FZD2	1807.38	-0.522431	0.155172	-3.36679	0.00076049	0.0302597	1606.62	2380.6	20.8287	30.8628
BTBD10	957.332	0.457919	0.136124	3.36398	0.000768266	0.0302962	1010.88	720.844	17.1285	12.214
YWHAE	11764.2	-0.485898	0.144385	-3.36531	0.000764591	0.0302962	10343.2	14844.2	137.661	197.565
PRKAG2	1758.73	0.632316	0.187924	3.36475	0.000766135	0.0302962	1957.63	1187.23	21.8002	13.2209
VEZF1	1596.9	-0.386737	0.115047	-3.36154	0.000775092	0.0304747	1531.97	2025.93	16.3713	21.6501
BRPF3	883.255	-0.570815	0.169871	-3.3603	0.00077859	0.0305217	752.177	1165.28	6.18308	9.57885
TMEM208	868.056	0.439137	0.130727	3.35919	0.000781724	0.0305541	916.353	663.883	57.1399	41.397
CAV1	11035.7	-0.406269	0.121041	-3.35645	0.000789488	0.0307668	10243.6	13763.4	138.646	186.285
HIST1H2AC	117.838	0.926322	0.276252	3.35318	0.000798901	0.0310423	221.163	83.4123	20.0548	7.56371
EPSTI1	20.4258	0.952013	0.284141	3.3505	0.000806667	0.0311865	41.731	9.74844	0.645462	0.150781
TMEM106B	3633.51	-0.407516	0.121666	-3.34947	0.000809672	0.0311865	3542.2	4763.95	26.923	36.209
ACER2	41.0782	0.928342	0.277138	3.34975	0.000808842	0.0311865	68.4452	24.7232	1.1882	0.429193
PNMA2	3474.71	-0.467216	0.139589	-3.34709	0.000816642	0.0313638	2665.34	3767.48	27.2312	38.4915
PPP1R3E	151.424	-0.667646	0.199593	-3.34504	0.000822719	0.0315058	127.098	216.924	1.39993	2.38933
FBXO21	779.054	-0.476454	0.142554	-3.34227	0.000830956	0.0316384	695.773	990.322	8.13799	11.5831
FLJ10038	84.8702	-0.737308	0.220557	-3.34294	0.000828951	0.0316384	72.4339	133.468	0.603338	1.11172
IFI44L	548.399	0.772167	0.231523	3.33516	0.000852491	0.03207	867.382	444.808	7.28491	3.73582
MEX3A	275.482	-0.573202	0.17181	-3.33625	0.000849179	0.03207	225.107	350.377	1.81991	2.83268
PROSER3	243.622	-0.672781	0.201609	-3.33705	0.00084673	0.03207	176.205	304.576	4.06523	7.0269
CHAF1B	441.164	-0.663673	0.199001	-3.33502	0.000852928	0.03207	308.479	528.061	6.7016	11.472
PORCN	549.546	0.495932	0.148726	3.33454	0.000854394	0.03207	651.33	449.64	15.1968	10.491
CNST	590.286	0.374476	0.112398	3.33168	0.000863233	0.0321646	621.612	474.043	5.53133	4.21821
ABI1	1523.97	0.337689	0.101367	3.33137	0.000864197	0.0321646	1617.13	1269.58	21.2036	16.6467
ZBTB39	172.074	-0.566398	0.169974	-3.33227	0.000861411	0.0321646	148.188	228.572	1.17616	1.81416
TTC30B	124.773	-0.63183	0.18977	-3.32945	0.000870166	0.0322961	114.301	187.129	2.14035	3.50411
RPLP0P2	25.2638	0.913473	0.274689	3.32548	0.000882655	0.0323966	33.6321	12.111	0.47238	0.170105
SYNM	350.283	-0.71691	0.215483	-3.327	0.000877868	0.0323966	290.737	527.634	1.95711	3.55179
SPHK1	2112.66	0.375922	0.113	3.32675	0.00087865	0.0323966	1964.96	1497.67	39.4031	30.0325
TGFBR3L	65.2789	-0.748462	0.225031	-3.32604	0.000880904	0.0323966	45.6025	86.4134	1.79762	3.40635
TFG	3309.09	0.39365	0.118472	3.32273	0.000891419	0.0326279	3528.48	2651.77	82.638	62.1052
HIST1H1C	329.367	0.951589	0.286507	3.32135	0.000895844	0.0326995	646.618	190.848	43.7355	12.9084
CENPC	265.735	-0.609612	0.183637	-3.31965	0.000901299	0.0328083	222.619	358.437	3.29112	5.29901
MORF4L2	7788.25	0.434844	0.131039	3.31842	0.000905269	0.0328625	8427.63	6125.11	189.318	137.594
CBX8	80.981	-0.654066	0.197301	-3.31506	0.000916241	0.0331063	66.6225	112.057	2.13358	3.5886
CENPA	757.293	0.704923	0.212657	3.31483	0.000916982	0.0331063	794.24	441.088	27.518	15.2824
ZNF346	254.377	-0.483236	0.145874	-3.31269	0.000924039	0.0332704	223.557	319.887	1.76868	2.5308
SPEN	1167.34	-0.603672	0.182447	-3.30876	0.000937112	0.033383	919.261	1474.62	3.72234	5.97113
NRP1	12851.8	-0.35773	0.108164	-3.30729	0.000942021	0.033383	12736.5	16475.1	106.626	137.926
GBF1	4780.79	-0.322845	0.0976282	-3.30688	0.000943404	0.033383	4369.59	5503.72	33.5932	42.3124
TMPO-AS1	86.5425	-0.857665	0.25939	-3.30647	0.000944803	0.033383	51.953	120.793	0.813736	1.89198
METTL9	2759.2	0.358679	0.108338	3.31072	0.00093055	0.033383	3067.59	2369.45	45.5269	35.1657
FST	212.062	-0.623569	0.188548	-3.30722	0.000942263	0.033383	164.143	268.309	3.8736	6.3318
AK6	480.01	0.574814	0.173677	3.30967	0.000934069	0.033383	528.493	339.107	10.0407	6.44257
PAXBP1	430.477	-0.45114	0.13656	-3.3036	0.000954507	0.0336362	367.889	513.042	4.23984	5.9127
PTTG1	3173.71	0.540044	0.163661	3.29978	0.000967594	0.0340069	3324.16	2202.77	141.88	94.0175
CCDC150	117.485	0.750671	0.227611	3.29805	0.000973604	0.0341277	115.494	59.9658	1.55174	0.805682
FAS	1057.42	0.586438	0.177967	3.29521	0.000983497	0.0343835	1200.07	760.223	22.0959	13.9974
FTO	921.618	-0.493846	0.149982	-3.29271	0.000992285	0.0345994	809.233	1171.05	9.33493	13.5087
SMARCA1	2262.7	-0.384001	0.116713	-3.29013	0.00100143	0.0348265	2095.66	2767.71	25.2574	33.357
NAGK	1197.54	0.427442	0.130063	3.28644	0.00101464	0.0351018	1314.32	960.726	36.1313	26.4109
RAD54L2	301.592	-0.523793	0.159378	-3.28648	0.00101449	0.0351018	247.068	367.587	2.59989	3.8681
ZNF646	448.941	-0.600439	0.182775	-3.28514	0.00101933	0.0351723	385.677	616.361	3.07588	4.91565
DEPDC5	213.995	-0.663812	0.202129	-3.2841	0.00102308	0.0352099	175.71	300.227	1.40928	2.40797
UBIAD1	386.433	-0.463069	0.141093	-3.28201	0.00103072	0.0352894	329.096	463.915	4.45914	6.2859
SNHG4	73.6872	-0.735214	0.223983	-3.28246	0.00102907	0.0352894	58.037	107.923	1.85863	3.45622
DYNC2H1	1025.94	-0.664135	0.202492	-3.27981	0.00103878	0.0354737	826.127	1415.41	2.98576	5.11555
KRTCAP2	859.817	0.366632	0.111858	3.27765	0.00104673	0.0356212	923.248	708.15	83.5658	64.0967
SMG1P1	54.6995	0.903604	0.275786	3.27646	0.00105116	0.0356212	58.4574	20.4722	0.577696	0.202313
TNS1	1217.94	-0.571447	0.1744	-3.27664	0.0010505	0.0356212	1048.04	1628.86	5.04955	7.84796
RAB18	1847.71	0.358159	0.10936	3.27504	0.00105647	0.0356329	1951.97	1508.17	18.9868	14.67
LOC100130705	23.8028	0.9039	0.276006	3.27493	0.00105689	0.0356329	41.7167	15.9613	0.543102	0.207797
TUBGCP4	470.221	-0.518562	0.158427	-3.27319	0.00106339	0.0356708	387.139	573.437	4.58332	6.7889
ABRACL	1376.34	0.4443	0.135726	3.2735	0.00106224	0.0356708	1527.14	1100.66	89.4786	64.4904
NCKAP5L	696.577	-0.457256	0.139866	-3.26925	0.00107833	0.0360068	666.242	933.43	6.73183	9.43156
CCDC85A	121.432	-0.65985	0.20186	-3.26884	0.00107988	0.0360068	96.0776	163.715	1.19429	2.03505
TANC1	1754.42	-0.448574	0.137246	-3.2684	0.00108156	0.0360068	1673.88	2330.68	11.0323	15.3612
ATP6V0B	2636.12	0.404352	0.123805	3.26603	0.00109065	0.0360224	2816.61	2097.5	67.4332	50.2168
STARD13	659.717	-0.565667	0.173228	-3.26545	0.0010929	0.0360224	512.652	793.115	3.37567	5.22244
MAST3	141.616	-0.649657	0.198924	-3.26585	0.00109137	0.0360224	120.543	202.332	1.01275	1.69991
TSPAN12	229.524	0.599507	0.183528	3.26657	0.00108858	0.0360224	251.056	156.778	4.84786	3.02737
MAP3K1	72.1252	-0.662836	0.20303	-3.26472	0.00109571	0.0360251	65.5826	111.361	0.432303	0.734063
TCEB3	1552.41	0.376924	0.115531	3.26255	0.00110415	0.0361233	1554.4	1183.49	15.5693	11.8542
RARB	848.024	-0.639756	0.196086	-3.26263	0.00110382	0.0361233	762.143	1269.42	10.6323	17.7091
NDFIP1	2334.74	0.357883	0.109723	3.26168	0.00110753	0.0361449	2593.22	2003.78	35.6941	27.5808
USP18	36.437	0.921377	0.282592	3.26045	0.00111236	0.0362133	63.7966	21.8287	1.55214	0.53108
ZNF417	96.2887	-0.64221	0.197078	-3.25866	0.0011194	0.0362642	80.8173	134.873	0.849714	1.41806
MRPL13	1005.56	0.37457	0.114926	3.25924	0.0011171	0.0362642	1080.24	823.739	48.1833	36.7421
LIPA	2923.14	0.337597	0.103644	3.25727	0.00112489	0.0363531	3423.76	2687.84	60.6917	47.6464
PHLDB3	124.049	0.646384	0.198658	3.25375	0.00113893	0.0367173	156.585	92.7291	3.11475	1.84454
TMBIM1	2551.14	0.349143	0.107495	3.24799	0.00116224	0.0373778	2712.37	2109.93	57.1694	44.4715
DDIT3	202.473	0.750182	0.231159	3.24531	0.00117321	0.0375485	282.336	146.812	11.8664	6.17041
GOLGA1	611.703	0.377134	0.116206	3.2454	0.00117285	0.0375485	663.902	505.227	6.73293	5.12373
WDR76	584.327	-0.661806	0.204004	-3.24408	0.00117829	0.03762	425.552	730.63	5.23201	8.98283
GLMP	1550.08	0.335624	0.103497	3.24286	0.00118338	0.0376919	1830.7	1438.94	48.9675	38.4887
RAE1	918.844	0.350659	0.108159	3.24207	0.00118665	0.0377052	954.362	741.702	21.7746	16.9226
EYA3	401.072	-0.604114	0.186394	-3.24105	0.00119089	0.0377426	329.394	529.835	2.59979	4.18179
SALL2	500.409	-0.598922	0.184975	-3.23784	0.00120436	0.0377426	459.245	733.357	4.2982	6.86368
GREM1	9531.02	0.508778	0.157088	3.2388	0.00120034	0.0377426	10286.6	7004.3	61.5389	41.9027
SLC6A6	2421.45	-0.608289	0.187876	-3.23771	0.00120491	0.0377426	2187.94	3531.47	15.7017	25.3435
ACVR2B	102.094	-0.635482	0.196267	-3.23785	0.00120436	0.0377426	86.6036	143.242	0.377015	0.62358
OSTF1	481.565	0.423315	0.130699	3.23886	0.00120009	0.0377426	504.308	369.458	19.0164	13.9315
BNIP2	1815.73	0.349125	0.107929	3.23478	0.00121738	0.0380356	1938.37	1508.12	38.1286	29.6654
NFU1	483.78	0.366379	0.113284	3.23416	0.00122001	0.0380356	545.036	418.302	22.6005	17.3453
CRTAP	6265.51	-0.313891	0.0970832	-3.23322	0.00122405	0.038072	6089.5	7618.88	45.3307	56.7155
FAM204A	1055.08	0.378241	0.117457	3.22025	0.00128079	0.0396113	1166.3	886.47	20.8764	15.8675
THOC3	234.345	-0.562697	0.174758	-3.21986	0.00128251	0.0396113	174.293	270.024	5.38996	8.35041
RGS20	696.957	0.447797	0.13902	3.22109	0.00127704	0.0396113	732.901	526.156	13.2239	9.49353
DCAF7	2358.11	-0.629891	0.195833	-3.21647	0.00129779	0.0398973	1900.58	3146.76	14.7467	24.4159
SELK	557.368	0.475173	0.147712	3.21688	0.00129592	0.0398973	559.983	392.457	33.8937	23.7539
MADD	696.951	-0.401354	0.124842	-3.21489	0.00130493	0.0399297	675.136	904.079	5.21309	6.98088
GOLGA3	2338.83	0.37332	0.116169	3.21358	0.0013109	0.0399297	2399.26	1831.04	12.3919	9.45712
PARL	663.778	0.39203	0.121979	3.21392	0.00130938	0.0399297	742.384	558.018	26.031	19.5664
BRI3	1949.02	0.426486	0.132669	3.21466	0.00130599	0.0399297	2235.43	1634.11	99.1732	72.4961
SF3B3	4362.99	-0.584805	0.182047	-3.21238	0.0013164	0.0400053	3581.61	5657.55	18.2435	28.8177
LACC1	169.827	0.809089	0.252456	3.20487	0.00135124	0.0409702	266.427	125.373	2.8991	1.36424
KAT7	756.508	-0.464019	0.144918	-3.20193	0.00136509	0.0412955	680.736	961.236	9.244	13.053
SNORD31	19.6067	-0.908031	0.283765	-3.19994	0.00137456	0.0414872	8.53472	27.6752	6.21409	20.1502
TRAPPC4	1061.99	-0.430418	0.134565	-3.19857	0.00138109	0.041536	895.4	1229.35	36.9431	50.7214
NDE1	1059.73	0.592698	0.185393	3.19699	0.00138871	0.041536	1067.66	669.134	6.60261	4.13804
AKT2	2751.78	-0.418379	0.13084	-3.19763	0.0013856	0.041536	2251.6	3060.7	21.0336	28.5919
PVT1	147.266	0.687243	0.214878	3.19829	0.00138245	0.041536	176.046	98.8959	5.13017	2.88192
ENPP1	427.263	-0.465067	0.145651	-3.19301	0.00140797	0.0420173	354.589	501.83	2.35902	3.3386
FMNL3	1780.85	-0.4719	0.147825	-3.19228	0.00141153	0.0420288	1561.21	2220.24	6.90638	9.82175
CENPV	130.941	-0.680631	0.213495	-3.18805	0.00143238	0.0425539	84.1803	149.41	3.58059	6.35514
IFFO2	506.888	-0.521503	0.163683	-3.18605	0.00144228	0.0427521	425.659	633.132	3.61175	5.37218
RBL1	468.702	-0.786824	0.247526	-3.17876	0.00147909	0.0437453	296.968	615.656	2.52847	5.24187
ELMSAN1	595.356	-0.586952	0.184697	-3.17792	0.00148335	0.0437735	540.5	854.851	3.24094	5.12584
SSR3	12914.1	0.38995	0.122804	3.1754	0.00149631	0.0440579	11626.1	8750.91	125.133	94.1874
RHEB	3497.73	0.518013	0.163266	3.17281	0.0015097	0.0443538	3724.47	2510.65	88.8677	59.9054
HIST2H2BE	117.857	0.780932	0.246246	3.17135	0.0015173	0.0443606	179.251	87.9653	3.99226	1.95916
BAHCC1	702.856	-0.468155	0.147593	-3.17192	0.00151432	0.0443606	664.067	941.233	3.14504	4.45771
NGFRAP1	3307.19	-0.507025	0.159902	-3.17084	0.00151998	0.0443606	3032.43	4449.95	110.884	162.717
UQCC1	1246.74	0.335198	0.10577	3.16913	0.00152895	0.0445243	1373.98	1079.89	27.7886	21.8407
RAB22A	1369.01	0.327451	0.10351	3.16348	0.00155896	0.0452988	1465.79	1159.25	8.38884	6.63451
SLC3A2	2834.99	0.481372	0.152204	3.16267	0.00156329	0.045325	3149.59	2194.56	53.7345	37.441
B4GALT3	1039.24	0.38047	0.12038	3.16057	0.00157458	0.0454537	1126.9	854.418	23.1028	17.5166
SHB	908.653	-0.391577	0.123879	-3.16098	0.0015724	0.0454537	848.599	1128.69	6.978	9.28121
NR2F1	3800.56	-0.586619	0.185699	-3.15897	0.00158325	0.0456046	3379.23	5355.44	44.9027	71.1623
ANKRD17	2114.71	-0.560483	0.17761	-3.1557	0.00160113	0.0460195	1802.4	2784.66	9.37766	14.4882
SERPINB7	125.311	0.687011	0.21791	3.15273	0.00161753	0.0462928	122.419	67.9986	2.56064	1.42233
LINC-PINT	198.187	0.515893	0.163635	3.15271	0.00161763	0.0462928	231.031	155.82	1.84283	1.2429
CNNM1	207.182	-0.604427	0.191802	-3.1513	0.00162544	0.0464161	178.025	287.509	1.47888	2.38837
ZC3H4	757.004	-0.606538	0.192576	-3.14961	0.00163489	0.0465855	619.484	1003.51	5.01487	8.12369
YES1	2988.3	0.412625	0.131144	3.14636	0.00165316	0.047005	2997.44	2214.29	31.6766	23.4004
LBH	1304.32	-0.649436	0.206551	-3.1442	0.00166542	0.0471512	1198.23	2031.56	20.1922	34.2354
IRS1	1470.17	-0.363279	0.115518	-3.14479	0.00166206	0.0471512	1469.75	1911.5	8.32966	10.8333
RRAD	40.9648	0.900696	0.28658	3.14292	0.00167273	0.0471513	68.7063	18.8187	2.30467	0.631248
GEMIN4	685.169	-0.715113	0.2276	-3.14197	0.00167817	0.0471513	456.379	847.692	6.03998	11.2188
RAB36	215.591	-0.508158	0.161746	-3.14171	0.00167965	0.0471513	188.361	276.426	2.44004	3.58085
DEPDC1B	689.894	0.562482	0.178953	3.14318	0.00167125	0.0471513	695.109	448.378	13.7441	8.86559
IFI44	235.919	0.78291	0.249371	3.13954	0.00169213	0.0472582	378.369	184.537	10.8536	5.29347
LIX1L	1106	-0.516853	0.164645	-3.13919	0.00169416	0.0472582	993.313	1471.93	12.3195	18.2555
ARHGAP11A	3647.19	0.640295	0.203921	3.13992	0.00168997	0.0472582	3663.23	2169.92	14.454	8.56184
PXDN	17037.7	-0.413943	0.132082	-3.13397	0.00172456	0.0476051	15496.1	21000.1	112.019	151.807
SCN3A	140.355	-0.566192	0.180635	-3.13445	0.00172174	0.0476051	125.112	194.272	0.67206	1.04356
NR2C2	984.392	-0.521094	0.166207	-3.1352	0.00171735	0.0476051	844.743	1257.64	4.93145	7.34189
SDHA	2882.17	-0.483435	0.154237	-3.13436	0.00172228	0.0476051	2605.35	3746.53	46.2337	66.4848
SESN1	394.546	0.743371	0.237126	3.13492	0.00171902	0.0476051	604.472	313.874	8.24228	4.27982
BCORL1	210.372	-0.53862	0.17192	-3.13297	0.0017305	0.0476697	192.07	289.723	1.29398	1.95188
CCNK	1266.04	0.375532	0.119919	3.13156	0.00173883	0.0477997	1300.12	990.048	24.7005	18.8096
NES	187.89	-0.71582	0.228631	-3.1309	0.00174271	0.0478073	132.625	246.498	1.18142	2.1958
TMED2	7412.21	0.431022	0.137774	3.12847	0.00175721	0.0481055	7816.85	5685.04	182.04	132.394
PHF8	358.694	-0.509644	0.162945	-3.12771	0.00176173	0.0481296	312.984	460.572	2.1427	3.15309
PTPRR	112.286	0.65101	0.208256	3.12601	0.00177197	0.0483098	118.61	68.9291	1.30994	0.761257
FKBP1A	6380.42	-0.430101	0.137681	-3.1239	0.00178473	0.0484582	5817.32	7991.4	144.225	198.126
RP1	42.3015	0.819988	0.262484	3.12396	0.00178437	0.0484582	68.1407	30.5678	0.475166	0.213159
PATL1	1092.09	-0.531424	0.170164	-3.12301	0.00179011	0.0484716	952.101	1431.38	11.4138	17.1594
KLHL2	574.388	0.354724	0.113616	3.12213	0.0017955	0.0484716	606.135	469.133	9.09672	7.04062
KMT2E	1241.06	-0.542727	0.173839	-3.12201	0.00179619	0.0484716	1137.58	1727.88	8.20661	12.4652
STRN4	1545.97	-0.378779	0.12135	-3.12138	0.00180003	0.0484764	1338.23	1763.32	20.6406	27.1971
EMC1	3268.19	-0.306089	0.0981259	-3.11935	0.00181253	0.048714	2981.39	3710.62	22.1272	27.5393
ADTRP	451.347	0.574815	0.184323	3.11852	0.0018176	0.0487515	454.817	288.944	12.1196	7.69955
2025-03-06	2323.12	-0.326452	0.104748	-3.11656	0.00182976	0.0489211	2183.84	2760.17	11.1501	14.0928
CTGF	5537.11	-0.874894	0.280747	-3.11631	0.00183131	0.0489211	3335.83	9064.73	70.4902	191.549
FOXC2	391.483	-0.622757	0.199918	-3.11506	0.0018391	0.0490304	310.352	512.389	9.14081	15.0914
DISP1	283.116	-0.549481	0.176538	-3.11254	0.00185485	0.0493029	254.007	387.801	2.55402	3.89931
MAP3K7CL	136.887	0.689083	0.221458	3.11158	0.00186089	0.0493029	133.044	73.3934	1.6977	0.936532
CCNJL	355.909	-0.572292	0.183954	-3.11105	0.00186421	0.0493029	290.185	454.465	3.70193	5.79768
PTPN12	2943.11	0.409509	0.131628	3.11111	0.00186388	0.0493029	2978.36	2204.8	44.7255	33.1092
MARCKSL1	2504.11	-0.348764	0.112215	-3.10799	0.00188365	0.0493147	2334.21	3002.61	73.987	95.1733
DRAP1	5385.33	0.333767	0.107427	3.10692	0.00189047	0.0493147	5587.48	4394.91	275.262	216.512
TIGAR	651.098	0.733928	0.236092	3.10866	0.00187941	0.0493147	920.504	481.662	5.54099	2.89937
GAS2L3	1424.32	0.655848	0.210963	3.10884	0.00187826	0.0493147	1491.88	865.338	11.5938	6.72475
MOGS	1709.56	-0.402665	0.129604	-3.10688	0.00189071	0.0493147	1506.57	2023.29	25.7655	34.6025
GTDC1	278.433	0.525201	0.168888	3.10977	0.00187233	0.0493147	328.421	219.636	3.56195	2.3821
MCM5	2245.05	-0.725576	0.233523	-3.10708	0.00188943	0.0493147	1534.53	2904.2	29.8411	56.4762
CALM2	12005.2	-0.59004	0.190125	-3.10343	0.0019129	0.0497956	9729.83	15529.5	99.2233	158.368
EDN1	81.7284	-0.863582	0.27843	-3.10162	0.00192467	0.0499587	51.6283	133.964	1.21721	3.1584
PPP2CB	2085.75	0.356186	0.114851	3.1013	0.00192671	0.0499587	2103.82	1626.11	52.8737	40.8678
VPS26A	4020.44	0.462835	0.149355	3.0989	0.00194243	0.0501699	4551.07	3219.54	83.423	59.0155
ZC3H7A	1777.99	0.388406	0.125314	3.09946	0.00193874	0.0501699	1862.13	1402.82	24.1601	18.2009
UCK2	965.899	-0.537222	0.17345	-3.09728	0.00195305	0.0503237	690.247	1046.33	6.94603	10.5293
WDR82	3237.37	-0.429851	0.138826	-3.09632	0.00195939	0.0503237	2859.36	3928.76	32.9843	45.3203
FLNC	11179.4	-0.506662	0.163637	-3.09626	0.00195977	0.0503237	8190.62	12049.8	44.3775	65.2867
RPL13AP20	34.6224	0.775475	0.250538	3.09524	0.00196652	0.0503992	42.6028	20.3911	3.19589	1.52966
CDKN1A	6825.22	0.868362	0.280832	3.09211	0.00198738	0.0508356	11834.3	4442.3	222.194	83.4055
CCNB2	3137.17	0.607251	0.196505	3.09026	0.00199981	0.0508703	3376.11	2071.65	107.91	66.2159
RBMS1	1540.68	-0.520068	0.168296	-3.09019	0.00200026	0.0508703	1400.98	2084.8	16.1836	24.0829
ADAMTS5	67.2442	0.7364	0.238218	3.09128	0.00199295	0.0508703	78.0009	40.0198	0.399655	0.20505
CCNB1	4509.41	0.68248	0.22096	3.0887	0.00201032	0.0510284	4833.77	2702.73	110.44	61.7506
RRAGC	1262.05	0.512833	0.16619	3.08582	0.00202989	0.0513186	1561.18	1055.46	28.282	19.1205
UCKL1-AS1	30.2178	0.833805	0.270214	3.08573	0.00203055	0.0513186	29.988	11.8534	0.415772	0.164342
TFDP2	705.254	-0.403773	0.130869	-3.08531	0.00203338	0.0513186	682.131	916.921	3.33031	4.4766
FOXJ3	927.492	-0.492265	0.159594	-3.08449	0.00203903	0.0513634	849.777	1232.4	7.28157	10.5602
FAM120AOS	591.873	0.386237	0.125372	3.08073	0.00206493	0.051917	668.544	504.163	11.9711	9.02763
TRAP1	1765.59	-0.33542	0.108951	-3.07864	0.00207945	0.0521831	1419.93	1808.75	30.6192	39.0036
PARPBP	595.409	0.590474	0.191925	3.0766	0.00209379	0.0524437	643.298	401.959	10.3376	6.45933
TOMM70A	1291.3	-0.4721	0.153608	-3.0734	0.00211632	0.052908	1150.95	1640.42	13.0071	18.5387
SUGCT	105.567	0.654029	0.212846	3.07278	0.00212075	0.0529189	145.412	84.4485	4.16633	2.41961
PQLC3	180.732	0.553253	0.180084	3.0722	0.0021249	0.0529227	225.47	146.36	5.70713	3.70469
ZNF616	103.592	-0.576815	0.1878	-3.07143	0.00213039	0.05296	88.6747	139.512	1.44087	2.26693
MIR614	21.7618	-0.875464	0.285097	-3.07076	0.00213515	0.0529789	13.4408	38.9002	7.39399	21.3997
CELF1	1826.49	-0.520333	0.169591	-3.06816	0.00215384	0.0533428	1607.29	2395.12	8.76023	13.0541
RAB3B	1787.59	-0.704196	0.229603	-3.06701	0.00216208	0.053447	1203.45	2220.08	4.639	8.55789
EFTUD2	2720.92	-0.435745	0.142158	-3.06521	0.00217517	0.0535706	2256.54	3118.68	24.4951	33.8538
SYNGAP1	785.733	-0.607767	0.198244	-3.06575	0.00217125	0.0535706	665.005	1082.85	2.73916	4.46028
UBE2D1	483.309	0.411381	0.134364	3.0617	0.00220085	0.0538206	557.212	411.73	10.3909	7.67795
SPATC1L	253.109	-0.513257	0.167596	-3.06246	0.00219529	0.0538206	215.13	318.449	2.29948	3.40384
CDK6	1052.41	-0.601591	0.196465	-3.06208	0.00219807	0.0538206	898.896	1454.74	3.78378	6.12354
PBK	2754.75	0.600803	0.196238	3.0616	0.00220157	0.0538206	2947.64	1818.59	67.8786	41.8787
FAM49A	185.177	0.591641	0.193305	3.06066	0.00220848	0.0538903	257.564	160.966	2.71379	1.69601
LMOD1	272.76	-0.542349	0.178035	-3.0463	0.00231677	0.056222	234.231	357.22	2.92335	4.45832
NPIPB3	288.966	0.724134	0.237683	3.04664	0.00231413	0.056222	265.72	138.023	3.63423	1.88773
C1D	653.95	0.439977	0.144387	3.0472	0.00230982	0.056222	729.598	525.835	28.133	20.276
ORAI1	329.927	-0.598139	0.196464	-3.04453	0.00233044	0.0563546	264.479	426.851	8.75299	14.1267
COPS8	2374.08	0.387315	0.127219	3.04448	0.00233085	0.0563546	2705.55	2038.46	57.664	43.4461
SPDL1	1937.93	0.565786	0.185873	3.04394	0.00233499	0.0563546	1870.87	1197	34.731	22.2213
KDM2B	810.471	-0.394214	0.129541	-3.04317	0.00234102	0.0563974	734.892	980.925	6.33111	8.45068
CSRNP2	910.924	0.423412	0.139258	3.04049	0.00236197	0.0566623	984.188	719.392	10.3632	7.57496
HJURP	2651.02	0.658665	0.216658	3.04012	0.00236485	0.0566623	2697.09	1547.92	41.8734	24.032
SLC22A23	215.424	0.540764	0.177872	3.04018	0.00236439	0.0566623	273.911	180.135	1.89804	1.24823
CLCF1	852.408	0.460276	0.151583	3.03646	0.00239374	0.0572511	899.719	637.348	22.5776	15.9936
CCSAP	480.222	0.492293	0.162193	3.03523	0.00240351	0.0573325	506.242	348.318	4.89442	3.36758
CCDC90B	1015.26	0.451343	0.148769	3.03386	0.00241445	0.0573325	1207.61	861.486	13.5178	9.64337
SLC16A6	150.577	0.745589	0.245748	3.03395	0.00241373	0.0573325	243.782	124.588	3.05177	1.55965
BRWD3	308.003	-0.516854	0.170311	-3.03477	0.00240718	0.0573325	281.832	418.594	1.09072	1.62001
MAP3K6	497.258	-0.486107	0.160311	-3.03228	0.00242711	0.0574246	404.036	584.28	4.60074	6.65318
CDKN3	1509.68	0.543484	0.179264	3.03176	0.00243134	0.0574246	1583.56	1036.59	87.9942	57.6006
PCYOX1L	279.362	-0.437881	0.144412	-3.03216	0.00242809	0.0574246	245.015	339.315	4.72567	6.54447
ATP6V0C	3581.16	0.385494	0.127241	3.02963	0.00244854	0.0577279	3706.48	2796.19	149.074	112.462
BAK1	639.326	0.431979	0.142633	3.02859	0.00245695	0.0578234	702.107	509.039	15.8512	11.4924
STXBP6	40.46	-0.786569	0.260071	-3.02444	0.00249093	0.0579715	25.3524	55.445	0.25271	0.55267
SNAPC1	599.682	0.481896	0.159352	3.02411	0.00249369	0.0579715	613.989	426.284	11.4454	7.94636
FNDC4	484.707	0.464954	0.153667	3.02572	0.00248039	0.0579715	498.856	351.301	14.7807	10.4088
IFIH1	241.07	0.758556	0.250838	3.02408	0.00249387	0.0579715	396.507	197.508	5.45313	2.71631
PREX1	1149.86	-0.362508	0.119809	-3.02571	0.00248048	0.0579715	1070.17	1392.43	7.98806	10.3935
COL4A3BP	1140.19	0.432484	0.142939	3.02566	0.0024809	0.0579715	1386.44	1005.79	12.2184	8.86382
VPS37A	900.711	0.338006	0.111682	3.0265	0.00247405	0.0579715	933.317	731.492	10.0783	7.89892
NDRG3	943.51	-0.36084	0.119359	-3.02316	0.00250153	0.0580477	893.628	1160.32	14.6309	18.9974
KLF2	545.837	-0.698413	0.231073	-3.02248	0.00250711	0.0580754	419.909	770.111	12.6076	23.1222
FBN2	2518.21	-0.570749	0.188882	-3.02172	0.0025134	0.0581197	2008.96	3155.63	9.27494	14.5689
RNF11	2691.76	0.375072	0.124242	3.01889	0.00253701	0.0582588	2994.57	2277.82	48.2312	36.6871
WIPI1	868.071	0.469859	0.155605	3.01956	0.00253139	0.0582588	1003.18	703.913	25.8148	18.1139
LRRFIP2	1371.63	0.433304	0.143523	3.01907	0.00253556	0.0582588	1276.03	924.784	16.3375	11.8403
LARP7	1073.78	0.417294	0.138191	3.01969	0.00253035	0.0582588	1202.27	883.489	22.4793	16.5189
PFAS	1032.69	-0.645607	0.21392	-3.01798	0.00254462	0.0583325	668.295	1147.23	6.14441	10.5478
ZSCAN9	134.126	-0.579051	0.191928	-3.01702	0.00255274	0.0584176	117.824	185.673	3.17902	5.00969
RALA	1825.34	0.390242	0.12938	3.01624	0.0025593	0.0584667	2046.17	1537.3	36.0523	27.0863
SLMAP	1468.23	0.356327	0.11818	3.01511	0.00256889	0.0585848	1598.13	1234.41	11.0927	8.56809
DSN1	472.925	-0.617	0.204763	-3.01324	0.00258477	0.0588456	354.992	587.837	6.98285	11.563
C18orf8	458.181	0.476984	0.158392	3.01141	0.00260037	0.0590994	501.124	349.471	11.146	7.77291
C21orf58	314.724	-0.657293	0.218385	-3.00979	0.00261431	0.0593143	220.546	384.479	2.872	5.00677
SP100	2725.33	0.384873	0.127919	3.00872	0.00262348	0.0594208	3248.61	2451.61	21.0304	15.8709
ISCU	1209.08	0.440416	0.146476	3.00674	0.00264062	0.0597068	1505.24	1083.71	30.9104	22.2542
NID1	1305.92	-0.576167	0.191733	-3.00506	0.00265533	0.0599008	1012.19	1600.63	8.52133	13.4753
CYB5R4	370.891	0.483244	0.160828	3.00472	0.00265824	0.0599008	435.667	302.069	9.5995	6.6558
ARNTL	326.516	0.555537	0.185014	3.00268	0.00267614	0.0600487	395.744	255.724	6.71009	4.33597
EHD2	4009.53	-0.567598	0.189073	-3.00201	0.00268204	0.0600487	3411.39	5342.42	47.126	73.8019
ZNF512	366.747	-0.385166	0.128309	-3.00186	0.00268339	0.0600487	356.65	472.006	4.76854	6.3109
ST6GAL2	97.3404	-0.810283	0.269867	-3.00253	0.0026775	0.0600487	76.878	172.312	0.538522	1.20702
FBXO30	815.648	0.373017	0.124281	3.00139	0.00268746	0.0600487	902.278	687.289	10.1367	7.72136
CHI3L1	31.0964	0.854221	0.284911	2.9982	0.00271576	0.0605789	45.3538	15.0815	1.22237	0.406475
ADIPOR1	2236.62	0.277571	0.0926273	2.99664	0.00272975	0.0607885	2278.01	1869.34	46.5478	38.1972
CELSR1	2597.26	-0.417053	0.139236	-2.99529	0.00274188	0.060879	2393.96	3258.95	10.4071	14.1674
LOXL2	8926.98	-0.533075	0.177979	-2.99516	0.002743	0.060879	6894.03	10434.5	89.5871	135.595
PRKAB1	495.714	0.362782	0.12115	2.99449	0.002749	0.0609102	554.901	426.089	11.4425	8.7863
DCTD	2705.58	0.288373	0.0963959	2.99155	0.0027757	0.0613989	2752.42	2240.5	66.7354	54.3234
SNW1	1526.99	0.334868	0.112096	2.98734	0.00281416	0.0621461	1646.77	1293.12	38.3682	30.1285
CNTROB	1350.34	0.513513	0.172141	2.9831	0.00285346	0.0627003	1352.09	909.828	16.158	10.8728
FDXR	415.271	0.688462	0.230725	2.9839	0.00284596	0.0627003	626.49	345.45	12.6345	6.96676
PIM1	364.42	-0.502382	0.168387	-2.98349	0.00284985	0.0627003	334.202	490.163	6.10798	8.95838
PITPNB	1135.73	-0.577107	0.193512	-2.98228	0.00286107	0.0627636	934.057	1479.36	15.2425	24.141
ARHGEF16	24.0116	-0.805379	0.270241	-2.98023	0.00288033	0.0627946	16.8966	38.4898	0.288071	0.656216
DYNC1H1	11233.1	-0.666599	0.223637	-2.98072	0.00287571	0.0627946	8700.2	15344.8	30.0384	52.9797
RAD51D	179.38	-0.65959	0.22128	-2.98079	0.00287505	0.0627946	130.431	228.267	2.50104	4.37708
USP16	1229.36	0.362739	0.12172	2.98011	0.00288144	0.0627946	1303.23	1001.1	21.2528	16.3258
GATAD2B	631.868	-0.476803	0.160125	-2.97769	0.00290425	0.0628997	610.203	874.249	2.05339	2.94192
CLK2	449.477	-0.636685	0.213834	-2.97748	0.00290627	0.0628997	373.623	632.787	4.24467	7.18898
HKDC1	80.9994	0.663475	0.222835	2.97743	0.0029068	0.0628997	92.5038	52.4355	1.2415	0.703743
MEX3C	1557.45	0.37394	0.125627	2.97659	0.00291475	0.0628997	1689.13	1285.46	20.1907	15.3654
HERC6	395.24	0.711528	0.238956	2.97765	0.00290467	0.0628997	610.162	325.175	7.76792	4.13978
ZNF827	667.925	-0.399318	0.134136	-2.97697	0.00291113	0.0628997	637.703	855.147	4.04938	5.43013
MMP1	23.852	0.831587	0.279479	2.97549	0.00292518	0.06292	36.4556	6.64704	0.878315	0.160145
UBALD2	863.612	0.439527	0.147715	2.97551	0.00292504	0.06292	873.39	628.967	27.2133	19.5975
RAD17	707.397	0.407474	0.136969	2.97494	0.00293047	0.0629315	801.821	593.646	5.13565	3.80229
YWHAB	6172.22	-0.465695	0.156579	-2.97419	0.00293762	0.062983	5423.11	7704.73	83.3595	118.431
TFE3	3245.76	0.316177	0.106365	2.97258	0.0029531	0.0632125	3385	2696.57	48.5637	38.6869
CABLES1	404.993	-0.480472	0.161741	-2.97063	0.00297192	0.0635129	394.384	567.657	3.72637	5.36355
AMOTL1	3560.94	-0.457357	0.154065	-2.9686	0.00299159	0.0637209	3108.04	4383.99	17.0998	24.1197
RHOQ	1460.82	0.424075	0.142876	2.96814	0.00299609	0.0637209	1667.59	1216.88	18.1777	13.2647
PHKA1	463.85	-0.358736	0.120823	-2.9691	0.00298675	0.0637209	407.808	529.757	3.27719	4.25719
VPS26B	954.163	-0.373072	0.125777	-2.96613	0.00301571	0.063944	893.18	1172.2	11.8525	15.5552
TOP3A	443.925	-0.509915	0.171916	-2.96608	0.00301623	0.063944	345.65	512.839	4.15775	6.16883
PBX1	546.928	-0.550749	0.185736	-2.96522	0.00302464	0.06402	534.022	821.077	3.83018	5.88902
BATF2	12.1552	0.848206	0.286169	2.964	0.00303666	0.0640696	21.4726	7.19304	0.453549	0.151933
CAPN5	975.301	-0.332523	0.112171	-2.96443	0.0030324	0.0640696	983.408	1249.34	11.0909	14.0901
ZKSCAN2	158.506	-0.540438	0.182465	-2.96188	0.00305769	0.0644107	146.195	222.541	1.01575	1.54619
CDC6	732.429	-0.758847	0.25633	-2.96043	0.00307209	0.0646114	461.925	959.647	7.49104	15.5626
RGS4	7856.8	-0.639545	0.216205	-2.95806	0.00309584	0.0650078	6314.11	10770	78.5859	134.044
CAB39L	320.648	0.425774	0.144029	2.95617	0.00311488	0.065304	362.316	263.977	4.2956	3.12971
ATG4A	243.199	0.497652	0.168377	2.95558	0.00312078	0.0653244	277.576	189.414	5.93904	4.05272
KHDRBS1	4470.99	-0.376352	0.127433	-2.95333	0.00314369	0.0654935	3837.07	5053.61	50.9181	67.0615
RAP1B	2623.16	0.335679	0.113652	2.95358	0.0031411	0.0654935	2604.16	2043.5	59.9133	47.0143
FAM117B	133.795	-0.577391	0.19545	-2.95416	0.00313524	0.0654935	130.801	205.867	1.12178	1.76556
WWC3	1636.68	-0.428449	0.145128	-2.95221	0.00315511	0.0656282	1422.48	1957.36	10.9123	15.0155
MGST3	1711.36	0.288781	0.0978637	2.95085	0.00316897	0.0658132	1963.41	1596.98	64.038	52.0865
PER3	505.819	-0.385445	0.130646	-2.95031	0.00317456	0.0658263	482.815	640.669	3.74325	4.96709
NPIPB5	114.572	0.722547	0.244946	2.94982	0.0031796	0.0658276	112.803	57.5884	1.46356	0.747178
PFDN4	460.848	0.403819	0.137232	2.94261	0.00325461	0.0672756	530.516	393.461	19.5142	14.4729
EXO1	437.988	-0.696526	0.237007	-2.93884	0.00329447	0.0678757	283.597	528.591	4.05576	7.55946
CDK2	968.382	-0.523126	0.177978	-2.93928	0.0032898	0.0678757	721.002	1083.86	15.5138	23.3214
RRM2B	1229.38	0.658495	0.224099	2.93841	0.00329902	0.0678757	1775.38	1014.26	16.9038	9.65698
FOS	932.211	-0.670227	0.228243	-2.93647	0.00331974	0.0679865	296.605	2390.54	6.80493	54.8456
GLCE	659.456	-0.388343	0.132225	-2.93698	0.00331427	0.0679865	599.884	798.321	5.88947	7.83766
SLC26A4	273.423	-0.560229	0.190784	-2.93646	0.00331979	0.0679865	241.328	375.634	2.42457	3.77391
PPP2R5A	604.418	0.405777	0.138232	2.93549	0.00333026	0.0680957	653.737	484.319	9.47785	7.02164
KATNBL1	657.858	0.367084	0.125074	2.93493	0.00333624	0.0681129	686.072	525.009	12.397	9.48666
PRDX5	4432.33	0.29628	0.101089	2.93088	0.00338	0.0687941	4955.6	4007.79	271.11	219.257
APLP2	22076.2	-0.365265	0.124608	-2.93132	0.00337527	0.0687941	20704.2	27023.6	256.783	335.158
SMAP2	404.142	-0.438205	0.149605	-2.92907	0.00339978	0.0688793	353.022	489.638	5.36638	7.44312
IFI16	1770.84	0.468326	0.159865	2.9295	0.00339505	0.0688793	2344.62	1644.72	40.0011	28.0602
HEATR6	387.95	-0.402405	0.137378	-2.92919	0.00339846	0.0688793	351.706	473.18	4.4252	5.95359
UBC	13111.9	-0.553108	0.188865	-2.92859	0.00340499	0.0688795	11446	17715.8	219.225	339.311
CRK	2217.59	0.331528	0.113228	2.92796	0.00341192	0.0689146	2258.52	1777.79	18.4522	14.5246
GPAT3	971.997	0.441547	0.150834	2.92738	0.00341834	0.0689391	1064.81	764.669	18.0421	12.9566
UBE2D3	6782.25	0.337479	0.115341	2.92594	0.00343418	0.0691533	7294.59	5713.88	67.6834	53.0167
AIDA	1930.84	0.337839	0.115642	2.92142	0.00348444	0.069847	1994.78	1562.26	32.8551	25.7313
SIPA1	598.359	-0.45622	0.156156	-2.92157	0.0034827	0.069847	504.915	712.083	6.74544	9.51311
TRRAP	1855.78	-0.578765	0.198058	-2.9222	0.00347569	0.069847	1473.43	2347.37	5.75454	9.16774
CHRM3	17.8835	0.835932	0.286369	2.91908	0.0035107	0.0699255	19.517	5.32227	0.352021	0.0959957
NPAT	351.412	-0.562312	0.192688	-2.91825	0.00352002	0.0699255	306.614	479.355	2.55695	3.99749
SPTBN5	25.2748	0.828467	0.283702	2.9202	0.00349808	0.0699255	27.2301	8.97059	0.115002	0.0378861
BTBD1	2199.38	0.333374	0.114208	2.91901	0.0035115	0.0699255	2360.38	1855.06	35.5208	27.9164
AMZ2	1404.11	0.446685	0.153046	2.91863	0.00351576	0.0699255	1673.76	1196.46	41.8528	29.9177
AMOT	268.374	-0.457659	0.156789	-2.91896	0.00351203	0.0699255	228.401	323.033	1.53104	2.16539
LOC100506844	203.454	0.54318	0.186221	2.91686	0.00353574	0.0701326	243.881	158.742	10.8585	7.06781
SS18	2333.35	0.321077	0.110107	2.91605	0.00354493	0.0702099	2365.5	1877.1	32.9166	26.1204
IL17RA	494.393	-0.412657	0.141591	-2.91443	0.00356339	0.0704494	442.784	601.013	2.54675	3.45684
HIP1	631.297	-0.495543	0.170053	-2.91406	0.00356767	0.0704494	530.169	776.271	3.2648	4.78029
ARAP3	946.97	-0.359384	0.123371	-2.91304	0.00357927	0.0705735	853.445	1108.77	8.03012	10.4325
PTMA	23070.8	-0.331383	0.113799	-2.91199	0.00359133	0.0707061	19399.9	24651.9	795.776	1011.21
SRM	1617.97	-0.564216	0.193966	-2.90884	0.00362773	0.0710036	1216.51	1909.79	47.3133	74.277
PITPNM2	747.59	-0.554649	0.190632	-2.90953	0.00361977	0.0710036	619.677	961.647	4.42019	6.85947
FAM217B	332.363	-0.464548	0.159703	-2.90883	0.00362788	0.0710036	301.49	428.121	2.83459	4.02516
RNF20	856.928	-0.416691	0.14323	-2.90926	0.00362289	0.0710036	761.439	1038.1	9.56347	13.0383
LOC284454	118.139	-0.753002	0.25906	-2.90667	0.00365294	0.0711106	90.9298	186.704	2.53776	5.21072
PLAUR	4998.7	0.462962	0.159284	2.90651	0.00365482	0.0711106	4437.08	3123.2	109.24	76.8926
KLHL22	550.108	-0.451143	0.155187	-2.90708	0.00364818	0.0711106	474.216	666.21	8.97504	12.6087
EGFR	2133.86	-0.539359	0.185555	-2.90674	0.00365218	0.0711106	1708.39	2611.9	12.8722	19.6799
ROR1	397.818	-0.489625	0.168492	-2.90592	0.00366179	0.0711418	327.737	477.486	2.46865	3.59662
TIPRL	1129.18	0.378543	0.130325	2.90461	0.00367711	0.0711602	1208.16	915.334	18.0879	13.7039
JMJD1C-AS1	18.1601	-0.798198	0.274861	-2.90401	0.00368422	0.0711602	12.4329	29.0045	0.46144	1.07648
CCDC86	892.138	0.484549	0.166852	2.90406	0.00368353	0.0711602	807.632	557.395	19.8443	13.6957
NBAS	1144.75	-0.307976	0.106019	-2.90493	0.00367341	0.0711602	1058.03	1320.32	7.17584	8.95477
AKIRIN1	1733.88	0.439786	0.151495	2.90297	0.00369637	0.071291	1849.33	1329.79	33.5881	24.152
ORAOV1	397.123	0.443832	0.152949	2.90183	0.00370991	0.0714481	380.218	272.467	7.44947	5.33834
SPTAN1	6569.7	-0.438298	0.151078	-2.90114	0.00371802	0.0715004	5544.82	7701.47	34.7195	48.2236
FANCF	213.362	-0.430439	0.148397	-2.90059	0.00372459	0.071523	204.206	280.799	3.05541	4.20142
CHPT1	697.539	0.354746	0.122373	2.8989	0.00374471	0.0718052	706.737	546.168	22.3299	17.2566
GRAMD3	636.493	0.415632	0.143423	2.89794	0.00375619	0.0719213	722.417	530.783	10.1727	7.47421
HUWE1	5738.65	-0.584699	0.201871	-2.8964	0.00377473	0.072172	4607.29	7399.29	15.4745	24.8519
ZNF792	47.8414	-0.705478	0.243649	-2.89548	0.00378585	0.0722803	41.0104	76.1339	0.522234	0.969503
LSM12	347.615	-0.401476	0.138713	-2.8943	0.0038001	0.0723541	319.954	429.913	6.37725	8.56892
PLEKHG4B	206.758	0.665036	0.229778	2.89425	0.00380064	0.0723541	302.011	170.241	1.29854	0.731978
RAB1A	3843.77	0.339886	0.117463	2.89355	0.00380916	0.0724124	4043.47	3160.19	75.7452	59.1988
RBM18	498.143	0.337996	0.11686	2.89232	0.0038241	0.0725923	555.914	435.169	8.37347	6.55474
MGLL	3338.18	0.530002	0.183276	2.89182	0.00383016	0.0726031	2885.83	1902.05	29.7107	19.5823
EIF5	6564.02	0.398239	0.137763	2.89075	0.00384318	0.072746	6562.94	4890.06	51.832	38.6201
PSRC1	1147.6	0.64414	0.222957	2.88908	0.00386368	0.0730296	1172.93	675.211	32.7352	18.8444
ZNF609	1707.93	-0.441887	0.153011	-2.88794	0.00387773	0.0731909	1517.97	2115.35	8.72177	12.1541
CNKSR2	52.5294	-0.695833	0.241002	-2.88726	0.00388617	0.0732457	36.0663	67.8508	0.251892	0.473879
AP1M1	2014.36	-0.584842	0.202594	-2.88676	0.00389232	0.0732574	1565.52	2517.08	32.4173	52.1214
APIP	462.432	0.415871	0.144277	2.88244	0.0039461	0.0739764	512.877	376.471	19.8847	14.5961
TOB1	621.233	0.335619	0.11644	2.88235	0.00394727	0.0739764	744.632	583.822	14.6414	11.4795
MANF	1765.2	0.367898	0.127623	2.88269	0.00394297	0.0739764	1664.74	1271.88	85.5891	65.3909
CTDNEP1	1878.14	-0.36209	0.125658	-2.88156	0.00395718	0.0740574	1725.1	2246.36	46.0434	59.9561
MAT2B	1941.27	0.312536	0.108531	2.87969	0.00398066	0.0743917	2093.33	1671.52	41.2095	32.9057
LRRC41	1861.41	-0.405219	0.140825	-2.87747	0.00400878	0.0748118	1717.86	2318.58	28.8508	38.9396
SLC35B1	936.996	0.349078	0.121364	2.87629	0.00402375	0.0749855	949.944	736.886	29.1944	22.6466
CDK17	2105.23	0.404218	0.14059	2.87514	0.00403845	0.0751538	2015.45	1493.99	21.1725	15.6945
TPGS2	3235.31	-0.278996	0.0970576	-2.87454	0.00404615	0.0751915	3028.06	3696.06	28.2284	34.4556
IFITM3	1948.55	0.327763	0.114111	2.87232	0.00407471	0.0752997	2303.36	1817.25	170.719	134.69
SDHAF2	696.271	0.311214	0.108343	2.8725	0.00407241	0.0752997	771.783	616.696	31.3465	25.0475
IL17RD	1018.07	-0.445242	0.154979	-2.87293	0.00406688	0.0752997	947.328	1324.54	5.37875	7.52051
B3GNT5	436.31	0.470192	0.163648	2.87319	0.00406353	0.0752997	460.717	321.977	5.53246	3.86642
APOPT1	517.006	0.422775	0.147243	2.87128	0.00408815	0.075443	553.624	403.782	8.81357	6.42812
SUN3	16.8424	0.806202	0.280847	2.87061	0.00409675	0.0754964	20.3436	7.52043	0.656597	0.242725
STK4	1092.54	-0.544867	0.189906	-2.86914	0.00411594	0.0757448	928.678	1429.34	7.26372	11.1797
DNM1	745.455	-0.408885	0.14257	-2.86797	0.00413114	0.0759191	651.054	882.245	7.92964	10.7455
PPP4R2	1064.81	0.431836	0.150702	2.86549	0.00416365	0.076326	1160.14	839.589	39.2882	28.4326
JRK	453.993	-0.519225	0.181205	-2.8654	0.00416481	0.076326	364.09	546.497	1.9757	2.96552
TBC1D10B	953.028	-0.528432	0.184486	-2.86434	0.00417874	0.0764755	807.985	1223.14	12.1666	18.4179
PRPF8	7889.96	-0.471122	0.164731	-2.85995	0.00423709	0.0770706	6537.53	9363.35	22.1848	31.7741
SIRT7	371.89	0.451064	0.157642	2.86133	0.00421872	0.0770706	400.207	284.66	11.4468	8.14193
DGUOK	1016.13	0.381615	0.133399	2.86071	0.00422692	0.0770706	1131.71	854.632	48.9786	36.9871
FRAS1	644.407	-0.667432	0.233392	-2.85971	0.00424034	0.0770706	520.397	932.045	1.55728	2.78912
PPARGC1B	20.6977	-0.793453	0.277451	-2.85979	0.00423917	0.0770706	14.0884	33.4579	0.0644246	0.152999
IRF7	66.4058	0.679567	0.237851	2.85711	0.00427516	0.0774908	95.3131	52.1799	1.1036	0.604175
GLG1	5509.78	-0.325737	0.113994	-2.85749	0.00427004	0.0774908	5337.52	6753.73	27.9999	35.4292
DDR2	1789.71	-0.5013	0.175611	-2.85461	0.00430896	0.0778242	1584.04	2334.75	24.176	35.6333
PIGC	394.514	-0.436727	0.152999	-2.85445	0.00431117	0.0778242	380.102	526.642	12.546	17.3829
GINS1	455.4	-0.681339	0.238669	-2.85475	0.00430711	0.0778242	317.706	584.747	4.78255	8.8024
MAT2A	4195.4	-0.615104	0.215557	-2.85355	0.00432334	0.0779378	3288.72	5495.53	54.167	90.5145
AMMECR1L	983.49	0.302944	0.106289	2.85018	0.00436939	0.0785541	944.896	760.353	9.79119	7.87891
NAPEPLD	658.244	-0.393889	0.138185	-2.85044	0.00436584	0.0785541	659.461	881.64	3.04403	4.06959
PMAIP1	888.34	0.571672	0.200614	2.84961	0.00437734	0.0785905	917.5	576.647	23.4638	14.7469
GCNT3	24.3057	0.81597	0.286447	2.84859	0.00439141	0.0786966	43.3771	15.0916	0.966528	0.33627
STX1B	285.214	-0.747709	0.262509	-2.84832	0.00439513	0.0786966	210.294	436.818	2.22759	4.62711
VAMP4	593.779	0.398545	0.13997	2.84736	0.00440832	0.0787199	651.739	485.12	6.25955	4.65927
SNHG9	59.9682	-0.639345	0.224522	-2.84758	0.00440532	0.0787199	49.1284	84.133	10.4394	17.8775
STK10	734.002	0.403478	0.141728	2.84685	0.00441544	0.078741	712.998	528.624	5.86491	4.3483
WBP2	3049.05	0.301463	0.105954	2.84523	0.00443797	0.0790364	3448.31	2776.47	87.8228	70.7122
HIST1H4H	18.8562	0.814804	0.286518	2.84381	0.00445775	0.079176	31.9447	10.6707	4.22888	1.4126
DPYSL2	4204.73	-0.539528	0.189716	-2.84387	0.00445687	0.079176	3629.69	5562.42	34.3151	52.587
FOSL1	7809.95	0.483788	0.1703	2.84079	0.00450013	0.0798216	7645.38	5269.02	215.931	148.815
CCDC59	527.639	0.380806	0.134155	2.83855	0.00453195	0.0802785	540.735	408.803	15.351	11.6055
ARL6IP1	8380.04	-0.787511	0.277558	-2.83728	0.00454997	0.0803827	5355.1	12773.4	117.109	279.336
PHF3	1462.71	-0.317658	0.111957	-2.83731	0.00454951	0.0803827	1439.34	1810.02	7.69904	9.68183
RHEBL1	26.1249	-0.750789	0.265164	-2.83141	0.00463426	0.0806885	20.0761	41.8426	0.772322	1.60967
AP2B1	8275.88	-0.347929	0.122811	-2.83305	0.00461068	0.0806885	7114.08	9166.39	61.1178	78.7494
UBE2F	298.442	0.42282	0.149244	2.83308	0.00461016	0.0806885	330.123	240.729	6.74836	4.92098
SUMO3	2295.69	-0.461686	0.162949	-2.83332	0.00460678	0.0806885	1890.36	2686.15	48.7207	69.2308
C22orf29	381.561	-0.558441	0.197021	-2.83442	0.00459085	0.0806885	302.55	473.856	2.25763	3.53593
WNT5A	1744.49	-0.427083	0.150775	-2.83259	0.00461723	0.0806885	1693.8	2330.95	13.4285	18.4798
AIG1	947.626	0.349802	0.123493	2.83257	0.00461761	0.0806885	1091.5	845.948	11.4226	8.85295
DNAJC2	627.909	0.485701	0.171535	2.83149	0.0046331	0.0806885	614.958	423.098	13.7644	9.47007
MDFIC	2135.55	0.374473	0.132238	2.83181	0.00462857	0.0806885	2287.72	1737.82	20.523	15.5899
MRPS28	457.433	0.399648	0.141095	2.83248	0.00461888	0.0806885	499.679	371.419	34.9921	26.0101
LOC389831	335.376	0.423906	0.149705	2.83161	0.00463139	0.0806885	351.937	256.36	7.22112	5.26006
NADK2	478.104	0.44121	0.155901	2.83007	0.0046538	0.0808163	529.654	379.816	6.29312	4.51281
YKT6	3794.76	0.30191	0.106665	2.83044	0.00464846	0.0808163	3851.66	3099.9	68.9435	55.4872
RCAN3	273.606	0.445655	0.157567	2.82836	0.00467874	0.080837	297.272	212.073	4.85746	3.4653
DHRS1	384.81	-0.596798	0.210932	-2.82934	0.00466439	0.080837	333.904	545.089	9.58362	15.645
MED29	1114.86	-0.463747	0.163984	-2.828	0.00468394	0.080837	1032.05	1468.15	14.325	20.3782
TSPYL4	853.205	-0.487252	0.172265	-2.82849	0.00467676	0.080837	804.416	1169.12	9.64102	14.0121
TCAF1	1217.02	-0.355186	0.125601	-2.8279	0.00468549	0.080837	1148.32	1488.52	9.53922	12.3653
RBM4B	273.768	-0.462424	0.163575	-2.82699	0.00469881	0.0809613	249.551	354.205	6.70033	9.51023
AZI2	1113.81	0.42123	0.149054	2.82602	0.00471304	0.081101	1278.49	932.877	16.8751	12.3133
LINC01089	121.963	-0.677372	0.239812	-2.82459	0.00473407	0.0813572	104.083	188.997	3.38805	6.15208
2025-09-08	1661.84	-0.392351	0.138968	-2.82331	0.00475299	0.0815766	1378.38	1842.55	11.559	15.4515
GID4	291.678	-0.422895	0.149903	-2.82113	0.00478554	0.081693	267.366	366.145	3.12794	4.28356
GNAZ	56.0653	-0.689022	0.244247	-2.82101	0.00478731	0.081693	42.5333	79.2792	0.656436	1.22355
TOM1	741.247	0.371096	0.131526	2.82145	0.00478066	0.081693	851.563	648.296	16.6976	12.7119
TTC1	1400.04	0.350145	0.124148	2.82037	0.00479676	0.081693	1527.58	1183.36	51.0333	39.5334
MCM3	3040.82	-0.598759	0.212283	-2.82057	0.00479379	0.081693	2256.93	3710.35	34.8322	57.2635
HABP4	684.654	0.441789	0.156553	2.82198	0.00477274	0.081693	687.849	492.994	12.7789	9.15886
CDON	422.146	-0.554365	0.196671	-2.81874	0.0048213	0.081975	404.083	628.033	2.46505	3.83123
UBXN7	635.41	-0.437401	0.155215	-2.81803	0.00483189	0.081975	590.684	820.718	6.18027	8.5871
NEU1	1515.31	0.474099	0.168232	2.81814	0.00483035	0.081975	1890.54	1315.19	5.64956	3.93021
PSEN2	466.689	0.34263	0.121652	2.81648	0.0048553	0.0822669	502.947	392.268	10.836	8.45142
PPP1R12C	1594.35	0.416081	0.147832	2.81455	0.00488453	0.0824584	1574.85	1154.31	26.2974	19.275
FGFR1OP	656.487	0.512237	0.181999	2.8145	0.00488527	0.0824584	722.329	483.856	9.5725	6.41219
SCML1	417.4	0.565039	0.200749	2.81465	0.00488306	0.0824584	418.421	264.596	7.05354	4.46042
PLEKHA2	2084.44	-0.438393	0.155844	-2.81302	0.0049078	0.0827333	1944.14	2704.17	17.0666	23.7385
RNF6	1579.31	0.379276	0.134854	2.81249	0.00491597	0.0827657	1725.82	1305.39	21.6978	16.412
SAR1A	4431.62	0.380437	0.135294	2.81193	0.00492455	0.0828049	4818.13	3640.45	77.6776	58.6912
PRKCA	2366.41	-0.390138	0.138765	-2.8115	0.00493116	0.0828109	2065.26	2756.28	11.6593	15.5604
NFIC	3415.98	-0.427127	0.151984	-2.81034	0.00494891	0.0830039	2874.59	3960.88	17.4244	24.009
ERCC6	1116.39	-0.433338	0.154314	-2.80816	0.00498259	0.0833577	1116.26	1544.98	6.1455	8.50584
E2F7	559.236	-0.628009	0.223609	-2.80851	0.00497708	0.0833577	415.595	710.307	3.5841	6.1257
TOR2A	152.861	-0.598032	0.213047	-2.80705	0.00499978	0.0835398	125.514	206.038	2.45332	4.02726
MTPAP	364.285	0.426655	0.15207	2.80565	0.00502151	0.0837973	397.94	289.164	3.50573	2.54745
LRBA	2187.74	-0.346918	0.123673	-2.80513	0.00502971	0.0838284	2053.55	2644.54	10.2029	13.1392
TRIM45	77.8702	-0.654209	0.233268	-2.80454	0.00503877	0.083874	58.1744	102.796	0.804313	1.42125
ZNF445	377.262	-0.479696	0.171145	-2.80286	0.00506518	0.0842079	337.26	487.419	1.62923	2.35461
KIAA0895L	381.44	-0.623992	0.222663	-2.8024	0.00507235	0.0842213	307.42	521.518	4.47663	7.59431
RAB26	157.756	-0.644713	0.230099	-2.80189	0.00508044	0.0842501	145.143	251.293	3.93544	6.8136
ATP5B	12255.7	-0.297617	0.106282	-2.80025	0.00510628	0.0845317	11208.6	13882.2	301.109	372.933
CXXC5	1405.8	-0.492564	0.175915	-2.80001	0.00511018	0.0845317	1416.58	2071.13	48.4695	70.8659
BOLA3-AS1	79.7247	-0.572498	0.204504	-2.79945	0.00511891	0.0845705	65.2704	103.675	0.771258	1.22507
POLD3	541.306	-0.559038	0.199756	-2.7986	0.00513244	0.0846884	410.348	645.434	4.90382	7.7132
PPL	26.7706	-0.754631	0.269741	-2.79761	0.00514816	0.0848422	23.5581	48.7127	0.186979	0.386629
TRIAP1	612.916	0.551812	0.197332	2.79636	0.00516826	0.084894	802.876	515.459	33.6301	21.5911
PCGF2	485.292	-0.360824	0.129032	-2.79638	0.0051678	0.084894	480.774	625.423	4.57054	5.94566
HADH	808.88	-0.471655	0.168676	-2.79621	0.00517052	0.084894	678.927	975.069	16.5342	23.7463
SETD1A	1007.01	-0.37845	0.135393	-2.79519	0.00518685	0.0850567	881.611	1165.62	6.76834	8.94873
C1orf174	541.017	0.452667	0.162031	2.7937	0.00521083	0.0851713	551.749	391.312	16.397	11.6291
SMIM20	418.815	0.382887	0.13706	2.79356	0.00521313	0.0851713	483.714	364.405	23.6183	17.7928
NUDCD2	841.07	0.355876	0.127391	2.79357	0.00521302	0.0851713	871.683	671.91	45.5247	35.0913
CNTRL	698.743	0.527111	0.188716	2.79314	0.00521997	0.085178	742.519	489.115	4.94718	3.25883
GAR1	891.02	0.415685	0.148849	2.79265	0.00522781	0.0852011	893.901	655.334	34.9309	25.6085
TGFBI	15479.1	-0.595974	0.213488	-2.79161	0.00524464	0.0853704	12468.3	20450.2	220.075	360.962
NUP37	888.737	0.376258	0.134819	2.79083	0.00525724	0.0854176	878.603	666.16	36.0997	27.3709
PCBD2	264.86	0.460855	0.165143	2.79064	0.00526043	0.0854176	280.954	197.79	5.84954	4.11803
AHNAK	15987.6	-0.604012	0.21648	-2.79015	0.00526834	0.0854413	12484.8	20696.6	32.0855	53.1898
APOOL	338.904	-0.440515	0.157936	-2.78919	0.00528401	0.0855906	296.019	413.003	2.26628	3.1619
ATP6V0D2	64.0413	0.701783	0.25175	2.78762	0.00530974	0.0859023	106.19	55.8241	2.21837	1.16619
UBAP2	801.86	-0.604492	0.216901	-2.78695	0.0053207	0.0859747	611.206	1014.93	6.51057	10.811
HMGCL	719.175	0.38748	0.139097	2.78568	0.00534156	0.0862066	873.409	655.356	26.8924	20.1785
CDS2	1296.61	-0.367001	0.131895	-2.78252	0.00539386	0.0868992	1216.44	1592.12	6.46	8.45507
TMEM165	2683.23	0.397864	0.142998	2.7823	0.00539759	0.0868992	2768.83	2060.37	65.9702	49.0905
DENND3	422.497	-0.450131	0.161812	-2.78181	0.00540563	0.086923	361.283	508.443	3.28629	4.62489
FLJ37453	54.3232	-0.64386	0.231512	-2.78111	0.00541729	0.0870049	47.699	82.4618	0.864422	1.49441
UCP2	318.239	-0.655261	0.235662	-2.78052	0.00542725	0.0870594	243.026	433.05	7.31006	13.0258
AMH	28.4086	0.792663	0.285182	2.7795	0.00544423	0.0872262	29.3712	9.61805	0.720606	0.235973
SLC25A30	812.988	0.371083	0.133528	2.77907	0.00545142	0.0872358	864.576	658.275	10.8424	8.2552
CHRNA5	147.955	-0.489302	0.176092	-2.77868	0.00545807	0.0872369	111.681	163.648	1.52618	2.23635
CBX4	250.034	-0.514986	0.185428	-2.77728	0.0054816	0.087406	226.891	339.368	4.24066	6.34287
SPINT2	866.185	0.366172	0.131865	2.77687	0.00548844	0.087406	972.858	743.499	26.7296	20.4279
WDR36	1249.64	-0.438623	0.157954	-2.7769	0.00548796	0.087406	1123.89	1565.08	8.44123	11.7549
HELLS	523.961	-0.647206	0.233213	-2.77517	0.00551734	0.0874458	372.209	657.778	5.50755	9.73309
C11orf95	1018.57	0.368579	0.132764	2.7762	0.00549982	0.0874458	1079.69	823.493	9.57645	7.30411
EIF1AD	386.252	-0.495023	0.178343	-2.77568	0.00550872	0.0874458	339.803	498.615	5.75173	8.43989
CHAD	10.3678	-0.779732	0.28095	-2.77535	0.00551431	0.0874458	5.35031	19.5642	0.156281	0.571466
ARHGEF40	1393.66	-0.425814	0.153508	-2.77388	0.00553916	0.0875822	1339.37	1843.06	11.0799	15.2466
GSAP	340.051	0.415746	0.14987	2.77404	0.00553644	0.0875822	360.64	264.108	5.49231	4.02218
IDH2	1884.88	-0.36164	0.130463	-2.77197	0.00557186	0.087969	1588.21	2070.72	42.3897	55.2682
WBSCR22	1174.76	0.27677	0.0998565	2.77167	0.0055769	0.087969	1272.41	1043.76	42.394	34.7761
FAM102B	972.462	0.409188	0.147828	2.76801	0.00564005	0.0888594	1094.84	806.819	10.1509	7.48053
PHF2	813.952	-0.384664	0.13902	-2.76697	0.00565795	0.0890354	722.847	960.555	6.69069	8.89093
ASB16-AS1	135.856	-0.507361	0.18349	-2.76507	0.00569113	0.0892397	115.767	172.523	2.5384	3.78287
FBXO5	409.291	-0.790394	0.285847	-2.76509	0.00569065	0.0892397	227.903	634.952	4.57752	12.7533
MRPL18	1165.72	0.360484	0.130368	2.76512	0.0056902	0.0892397	1211.43	930.138	61.3906	47.1357
UBE2J2	1251.33	0.312693	0.113175	2.76292	0.00572862	0.0893639	1242.9	991.782	25.2511	20.1492
PHYH	333.82	0.411323	0.148835	2.76362	0.00571643	0.0893639	417.5	306.734	10.6715	7.84025
FAM24B	31.6521	0.747113	0.270461	2.76237	0.00573831	0.0893639	28.8393	12.5488	1.84955	0.804791
ID1	1148.39	-0.547311	0.198108	-2.76269	0.00573278	0.0893639	1089.79	1688.62	43.7956	67.8607
COX17	470.431	0.421205	0.152483	2.7623	0.00573952	0.0893639	503.689	367.294	58.9548	42.9904
GALNT11	802.581	0.314969	0.113975	2.76349	0.00571875	0.0893639	881.29	701.818	15.8897	12.6538
MAGI3	320.271	-0.496629	0.180026	-2.75865	0.00580409	0.0899149	251.928	371.739	1.72734	2.54882
TSEN15	630.312	-0.403878	0.146487	-2.75709	0.00583174	0.0899149	555.814	751.048	12.5484	16.9561
ANKRD26	390.697	-0.417482	0.151449	-2.75659	0.00584077	0.0899149	357.786	489.143	2.61309	3.57246
C16orf72	1427.52	0.280078	0.101528	2.75864	0.00580431	0.0899149	1537.29	1257.43	19.1285	15.6462
EIF4ENIF1	461.478	-0.360155	0.130658	-2.75648	0.00584277	0.0899149	409.208	532.971	5.22841	6.80972
PCGF3	1035.34	0.2814	0.102001	2.75881	0.00580126	0.0899149	1047.3	855.902	9.15308	7.48035
SKP2	327.932	-0.551053	0.199849	-2.75735	0.00582723	0.0899149	267.603	418.002	3.78115	5.90625
GMPR	406.317	-0.516036	0.187145	-2.75741	0.00582616	0.0899149	387.715	581.192	12.6706	18.9935
FIS1	1445.8	-0.42678	0.154661	-2.75945	0.0057898	0.0899149	1287.86	1774.88	86.2825	118.911
KLHL9	1097.94	-0.434354	0.157481	-2.75814	0.00581309	0.0899149	1044.16	1448.74	11.7173	16.2574
RFX2	86.9686	-0.529665	0.192213	-2.75561	0.00585822	0.089985	76.2349	115.936	0.917906	1.39592
KAT6A	1163.03	-0.548367	0.199011	-2.75546	0.00586091	0.089985	966.166	1502.69	4.81435	7.48784
HERC2P9	170.236	0.505984	0.183789	2.75307	0.00590394	0.0903252	180.556	121.21	1.5167	1.01818
MCM2	2063.3	-0.644686	0.234182	-2.75293	0.00590647	0.0903252	1506.24	2656.43	21.2706	37.5132
ADGRG6	377.774	-0.674995	0.245211	-2.75271	0.00591033	0.0903252	257.423	477.849	1.83094	3.39873
UBQLN2	881.606	-0.453373	0.164667	-2.75328	0.00590015	0.0903252	808.125	1140.99	11.7059	16.5276
HIC1	186.523	-0.623084	0.22646	-2.7514	0.00593404	0.0905725	145.682	248.606	2.25823	3.85367
NXT1	197.45	-0.625316	0.2273	-2.75106	0.00594019	0.0905725	150.017	256.958	6.64945	11.3895
RAB29	903.445	0.388577	0.141298	2.75006	0.00595849	0.0906433	1082.5	811.843	15.3392	11.5039
DNAH14	169.379	0.482528	0.175488	2.74963	0.00596618	0.0906433	181.294	124.821	0.620872	0.42747
DNA2	416.102	-0.634871	0.230935	-2.74914	0.00597519	0.0906433	297.292	517.844	3.3954	5.91436
PIAS1	383.242	-0.4576	0.16651	-2.74818	0.00599272	0.0906433	338.065	479.502	7.34112	10.4124
SGOL2	1623.68	0.610442	0.222072	2.74885	0.00598049	0.0906433	1673.67	993.343	17.7212	10.5177
FXR1	4462.21	0.324671	0.118078	2.74963	0.00596631	0.0906433	4886.33	3861.12	27.1551	21.4577
STOM	260.585	0.627371	0.228274	2.74832	0.00599017	0.0906433	334.348	194.241	4.97408	2.88972
DNMT3A	375.098	-0.378559	0.137809	-2.74699	0.00601448	0.0908687	347.979	460.284	3.04178	4.02347
LRRC45	479.066	-0.517338	0.1884	-2.74595	0.00603362	0.0910541	376.866	567.818	6.90812	10.4084
THY1	4828.2	-0.323021	0.117691	-2.74466	0.00605731	0.0912754	4434.04	5604.36	54.4339	68.801
SUOX	287.614	-0.477284	0.173923	-2.74422	0.00606552	0.0912754	274.681	396.052	5.5238	7.96456
STAT3	2264.82	0.260303	0.0948614	2.74403	0.00606895	0.0912754	2402.84	1995.81	23.9223	19.87
GMPS	1616.5	-0.348999	0.127256	-2.74251	0.00609724	0.0915528	1345.67	1737.71	27.1274	35.0305
HTATSF1P2	283.475	-0.398743	0.145405	-2.74229	0.00610121	0.0915528	262.786	353.385	2.8186	3.79036
FPGT	170.097	0.434728	0.158702	2.73926	0.00615769	0.0922956	203.328	146.383	2.13191	1.53484
COL4A1	3178.9	-0.560147	0.204564	-2.73825	0.00617678	0.092377	2646.62	4175.46	17.5792	27.734
NUP35	526.715	0.54159	0.197788	2.73823	0.00617706	0.092377	509.959	329.452	12.5864	8.13128
HIF1AN	1835.52	-0.461496	0.168634	-2.73667	0.00620644	0.0927117	1699.11	2418.7	12.1707	17.3251
SESN2	348.51	0.616703	0.225411	2.7359	0.0062209	0.0927188	502.7	296.953	7.05468	4.16732
TDP2	1065.77	0.380676	0.139122	2.73627	0.00621403	0.0927188	1201.01	906.421	30.8896	23.3129
VPS37C	542.539	0.353081	0.129097	2.73501	0.00623777	0.0928657	540.925	417.747	9.94853	7.68308
BOLA1	109.25	-0.524506	0.192009	-2.73168	0.00630127	0.0931562	94.9748	143.362	5.48687	8.2823
MT2A	33591.1	0.36707	0.134403	2.73112	0.00631204	0.0931562	34854.4	26599.5	4118.52	3143.09
MAP2K7	824.769	-0.311126	0.113822	-2.73345	0.00626747	0.0931562	770.544	964.967	10.7586	13.4732
POFUT1	2426.26	-0.264574	0.0968015	-2.73316	0.00627299	0.0931562	2181.15	2635.45	17.6023	21.2686
NMU	175.299	-0.556995	0.203864	-2.73218	0.00629165	0.0931562	126.332	199.727	6.42831	10.163
SCLT1	688.618	0.540923	0.198018	2.73169	0.006301	0.0931562	652.05	421.324	5.76077	3.72234
FAM3C	3005.75	0.31595	0.115689	2.73104	0.00631353	0.0931562	3182.2	2531.62	61.9796	49.3083
TMEM71	324.88	0.644995	0.236033	2.73265	0.00628278	0.0931562	344.851	193.987	7.98586	4.49223
NRBF2	900.57	0.422012	0.15457	2.73023	0.006329	0.0932806	974.582	709.118	25.3825	18.4686
FGFBP3	67.0343	-0.610313	0.223637	-2.72903	0.00635212	0.09331	58.8605	98.3571	1.13659	1.89926
ATP6V0A1	1214.18	0.304195	0.111465	2.72906	0.00635145	0.09331	1384.21	1111.59	16.4703	13.2265
FZR1	1229.29	-0.607454	0.222559	-2.72941	0.00634476	0.09331	942.067	1578.95	12.8704	21.5714
PLP2	3920.99	0.247718	0.0908264	2.72738	0.006384	0.0936744	3849.91	3227.47	181.881	152.475
PLEKHG2	750.69	-0.44391	0.162792	-2.72686	0.00639405	0.0937181	635.929	890.964	4.13897	5.79888
PTPN14	3617.71	-0.518567	0.190253	-2.72568	0.00641698	0.0939327	3001	4526.95	11.0527	16.6727
KCTD5	972.481	0.321231	0.117867	2.72537	0.00642287	0.0939327	971.687	770.022	19.5246	15.4725
EFTUD1	1060.32	0.325519	0.119531	2.72331	0.00646308	0.0944166	988.394	780.659	13.2798	10.4887
HSD17B12	2037.38	0.299204	0.109916	2.72212	0.00648645	0.0946536	2143.95	1728.42	41.7084	33.6247
CD3EAP	114.181	-0.516089	0.189686	-2.72075	0.00651332	0.0948211	85.4631	128.869	1.28534	1.93814
LAP3	889.467	0.359143	0.131982	2.72115	0.00650544	0.0948211	1013.09	778.125	23.885	18.3454
ZNF775	91.4125	-0.571953	0.210242	-2.72045	0.0065194	0.0948211	75.1379	120.328	1.63521	2.61869
PARGP1	75.6923	0.606808	0.223223	2.7184	0.00655993	0.0951186	69.5594	41.2386	2.3784	1.41004
SLC25A12	463.123	-0.483658	0.177921	-2.71838	0.00656019	0.0951186	408.618	594.332	5.06025	7.3601
CCDC71	370.327	-0.516491	0.190004	-2.71832	0.00656139	0.0951186	330.971	497.432	9.04334	13.5917
GMEB1	208.367	-0.454227	0.167279	-2.71538	0.00661993	0.0952399	186.35	263.273	3.42475	4.83846
EPB41	567.762	-0.379771	0.139842	-2.71571	0.00661331	0.0952399	527.756	698.221	4.15281	5.49417
USP12	1296.12	0.417447	0.153749	2.71512	0.00662511	0.0952399	1361.8	994.768	14.973	10.9375
OSGIN1	172.201	0.619758	0.228199	2.71587	0.00661017	0.0952399	225.793	132.285	5.76243	3.37602
C17orf96	161.485	-0.476916	0.175572	-2.71636	0.00660037	0.0952399	118.673	172.128	0.909812	1.31963
DPP4	722.925	0.561672	0.206711	2.71718	0.00658402	0.0952399	990.454	625.961	12.5738	7.94658
TPX2	7664.85	0.5698	0.20987	2.71502	0.00662726	0.0952399	7763.96	4842.52	104.969	65.4712
KBTBD2	1485.29	0.337863	0.124398	2.71598	0.00660794	0.0952399	1544.53	1207.62	20.612	16.1158
GPSM2	931.797	0.578703	0.213285	2.71329	0.00666193	0.0954276	973.884	600.798	15.8976	9.8074
NPR2	137.989	-0.515025	0.189789	-2.71367	0.00665428	0.0954276	113.512	170.463	1.63849	2.46056
SWI5	467.169	0.361767	0.133323	2.71347	0.00665829	0.0954276	508.525	389.326	25.665	19.6491
PIGU	459.337	-0.524499	0.19334	-2.71284	0.006671	0.0954544	373.09	567.23	10.0829	15.3296
TTC30A	224.706	-0.475869	0.175446	-2.71233	0.00668114	0.0954964	213.196	306.944	2.26075	3.25487
TOP2B	3081.62	-0.305286	0.112574	-2.71188	0.00669035	0.0955249	2932.26	3655.61	27.1716	33.8745
TMBIM4	981.15	0.329664	0.121633	2.71031	0.00672201	0.0958737	1092.97	859.949	27.0163	21.2564
SNAP25	94.1157	-0.503801	0.185978	-2.70893	0.00675015	0.0961715	81.7284	121.522	1.86299	2.77008
ATAD3B	742.613	0.391738	0.14489	2.70369	0.00685747	0.0974908	625.783	467.63	12.7344	9.51607
SLC35B3	606.29	0.362426	0.134037	2.70393	0.00685239	0.0974908	651.17	499.021	12.9011	9.88668
C8orf58	220.037	-0.511393	0.189172	-2.70332	0.00686512	0.097495	191.845	286.695	4.60861	6.88714
ZNF551	98.5705	-0.582913	0.215661	-2.70292	0.00687342	0.0975083	81.9584	133.311	1.09051	1.77379
PLCXD1	305.398	-0.665823	0.246397	-2.70224	0.0068875	0.0976035	208.246	384.579	0.959102	1.77123
C10orf90	15.6439	0.771047	0.285427	2.70138	0.00690521	0.09775	27.347	10.6427	0.439598	0.17108
CFAP126	71.2693	-0.567021	0.20999	-2.70022	0.00692932	0.0978217	60.8865	96.5776	3.84997	6.10678
C19orf43	1498.26	-0.509628	0.188709	-2.70061	0.00692126	0.0978217	1263.33	1889.75	68.7345	102.816
USP34	2844.76	-0.391917	0.14515	-2.70007	0.00693242	0.0978217	2588.14	3464.59	11.3298	15.1666
EDEM3	1127.05	-0.365182	0.135326	-2.69854	0.0069644	0.0978346	1082.27	1415.86	8.0796	10.5699
TARBP1	464.79	-0.332958	0.123333	-2.69965	0.00694117	0.0978346	377.541	481.725	3.64371	4.64922
GPRC5A	1258.87	-0.617034	0.228678	-2.69826	0.00697025	0.0978346	1044.52	1776.73	18.1391	30.8547
SNU13	1540.79	-0.410004	0.15195	-2.69828	0.00696983	0.0978346	1332.6	1812.33	38.0934	51.8067
COL8A1	6931.17	-0.352684	0.130667	-2.69911	0.00695261	0.0978346	6318.84	8184.51	101.213	131.097
RNF216	1327.44	-0.305198	0.113259	-2.6947	0.00704519	0.0987818	1201.67	1498.39	10.1701	12.6814
ARID2	603.054	-0.412903	0.153467	-2.6905	0.00713442	0.0992997	548.795	748.651	3.20944	4.37823
TMED8	90.2926	-0.66633	0.247578	-2.69139	0.0071155	0.0992997	70.0323	129.11	3.54533	6.5361
RPS27L	2691.83	0.50621	0.188172	2.69015	0.00714208	0.0992997	3445.85	2310.45	157.386	105.527
MLLT6	2684.34	-0.380763	0.141511	-2.6907	0.00713022	0.0992997	2341	3104.61	7.72695	10.2474
IFI35	361.143	0.538689	0.200219	2.6905	0.00713461	0.0992997	527.725	342.195	20.9023	13.5538
MGC27345	81.583	-0.647552	0.240585	-2.69157	0.00711172	0.0992997	58.5161	105.123	0.287445	0.516389
SMIM19	445.388	0.323043	0.120008	2.69184	0.00710594	0.0992997	495.448	391.664	15.7142	12.4225
MTFR1	663.283	0.393091	0.146005	2.69231	0.00709598	0.0992997	710.894	530.485	11.5022	8.58319
CKAP2	5074.82	0.582366	0.21652	2.68967	0.00715232	0.0993378	5314.91	3255.79	60.8425	37.2707
UBR3	759.867	-0.356984	0.132859	-2.68694	0.00721098	0.100048	696.556	905.675	4.33633	5.63818
ALKBH4	204.058	-0.391635	0.145782	-2.68645	0.00722161	0.10009	176.004	235.298	4.10847	5.49257
TGIF2	400.034	-0.332711	0.123867	-2.68604	0.00723042	0.100108	370.329	471.68	5.05938	6.44401
SV2A	1889.56	-0.384748	0.143381	-2.68339	0.00728798	0.10076	1762.2	2344.69	19.1794	25.5192
FLVCR1	162.769	-0.474623	0.176889	-2.68317	0.00729275	0.10076	136.47	197.523	1.13769	1.64665
DNAJB6	2643.4	0.366666	0.136693	2.6824	0.00730968	0.100889	2797.64	2134.88	43.4208	33.1345
C1orf74	77.9099	-0.624506	0.232848	-2.68204	0.00731757	0.100893	65.2936	111.784	0.665853	1.13996
EMC7	1225.38	0.360662	0.134597	2.67958	0.00737146	0.10153	1334.16	1022.84	62.7302	48.0925
LOC100506127	52.1472	-0.709676	0.264932	-2.67871	0.00739066	0.101583	40.008	80.2665	0.145573	0.292058
PPFIA2	149.899	0.427657	0.159644	2.67882	0.00738828	0.101583	170.235	123.279	1.28325	0.929293
LINC01279	796.077	-0.629084	0.23499	-2.67707	0.00742695	0.101976	687.296	1190.92	6.57426	11.3916
RNF149	747.538	0.352608	0.131734	2.67667	0.00743583	0.101993	774.456	597.947	12.919	9.97461
LDLRAP1	242.839	-0.476065	0.177908	-2.67591	0.00745276	0.102119	205.057	296.734	3.45911	5.0056
LRRC48	34.9628	-0.653699	0.244345	-2.67531	0.00746592	0.102194	29.4739	52.5242	0.564295	1.00561
SNRNP40	729.897	-0.505277	0.188976	-2.67375	0.00750075	0.102392	576.282	860.353	17.569	26.2294
C12orf75	4020.65	0.421963	0.157807	2.67392	0.00749706	0.102392	3750.78	2726.09	135.947	98.8067
CDC42EP4	812.635	-0.317024	0.118574	-2.67363	0.00750358	0.102392	777.181	977.967	12.4085	15.6142
CREBZF	778.767	-0.540528	0.202273	-2.67227	0.00753393	0.102611	645.621	1000.16	4.21981	6.53707
LRFN1	10.5182	-0.764758	0.286188	-2.67222	0.00753515	0.102611	5.58574	17.0986	0.0882991	0.270293
FLNB	6076.35	-0.456029	0.170744	-2.67083	0.00756637	0.102825	4824.59	6852.39	24.9862	35.488
ASMTL-AS1	53.6649	-0.683401	0.255848	-2.67112	0.00755982	0.102825	38.3263	73.5623	0.314477	0.603598
PRR36	50.5899	-0.698824	0.261813	-2.66917	0.0076039	0.103124	39.578	77.5509	0.433715	0.849841
FOXRED2	739.482	-0.586906	0.219871	-2.66931	0.00760063	0.103124	592.698	972.626	5.79021	9.50182
ZNF830	211.703	-0.476154	0.178425	-2.66865	0.0076157	0.103178	193.755	279.899	5.78931	8.36327
DNAJB1	2552.21	-0.450017	0.168654	-2.66828	0.00762407	0.103186	2282.86	3222.26	42.1579	59.506
MRPL9	968.043	0.278195	0.104312	2.66696	0.00765406	0.103331	1007.52	825.34	29.5514	24.2079
KXD1	1969.08	0.267888	0.100454	2.66678	0.00765818	0.103331	1986.59	1640.1	60.4529	49.9091
ZNRF3	205.298	-0.435926	0.163432	-2.66732	0.00764592	0.103331	176.137	245.376	1.28813	1.79449
THEM6	249.762	-0.54243	0.203487	-2.66567	0.00768343	0.103566	202.851	315.624	4.43607	6.90225
PAPOLG	241.916	-0.422439	0.158596	-2.66362	0.0077304	0.104093	239.092	328.147	1.6027	2.19967
SNRPB2	1317.58	0.337976	0.126995	2.66134	0.007783	0.104695	1401.79	1095.08	41.287	32.2533
SYF2	842.98	0.413087	0.155344	2.65918	0.0078331	0.104783	985.064	721.46	27.4457	20.1012
TRAPPC3	1749.84	0.266929	0.100373	2.65937	0.00782869	0.104783	1853.67	1531.31	52.3538	43.2492
DEPDC1	3240	0.579175	0.217756	2.65975	0.00781986	0.104783	3346.48	2052.01	30.4681	18.6826
GAS6-AS1	46.2213	0.702392	0.264169	2.65887	0.0078403	0.104783	67.3501	33.486	3.72574	1.85241
FN1	214972	-0.436498	0.164149	-2.65915	0.00783386	0.104783	182408	254357	1004.24	1400.35
AP3S1	1471.5	0.343103	0.129048	2.65873	0.00784363	0.104783	1548.19	1203.99	59.4659	46.2453
GDF6	890.23	-0.758191	0.285176	-2.65868	0.00784485	0.104783	665.839	1640.51	8.90733	21.946
TPT1-AS1	171.678	0.442508	0.166501	2.65769	0.00786786	0.104817	191.767	136.54	6.22181	4.42998
ARPC4	3590.92	0.312934	0.117753	2.65755	0.00787116	0.104817	3825.13	3048.39	91.0063	72.5263
C3orf67	88.0798	0.563622	0.212046	2.65802	0.00786019	0.104817	102.357	63.8817	1.98657	1.23983
DAD1	2159.21	0.297246	0.111909	2.65614	0.00790404	0.105149	2319.03	1871.07	164.729	132.909
CCNJ	493.555	0.472314	0.177854	2.65563	0.00791596	0.105202	498.693	345.602	5.96678	4.13507
NAV2	5331.79	0.629998	0.237274	2.65515	0.00792734	0.105248	5604.65	3186.67	23.6	13.4184
SNX24	499.702	0.405603	0.152787	2.65469	0.00793814	0.105286	523.381	385.862	12.1258	8.93974
SPRYD7	394.751	0.331898	0.125182	2.65132	0.0080177	0.106235	391.356	307.323	6.02121	4.72831
METTL10	1048.77	0.37491	0.141434	2.65077	0.00803082	0.106302	1026.01	777.116	13.8793	10.5124
CAND1	3187.61	-0.310648	0.11726	-2.64922	0.00806781	0.106605	2901.01	3634.16	23.9704	30.0283
EBAG9	325.27	0.39991	0.150959	2.64914	0.00806981	0.106605	347.457	257.583	6.14165	4.55304
KIAA1549L	2287.94	-0.452361	0.170807	-2.64837	0.00808801	0.106739	1708.21	2420.24	7.27834	10.3121
SLC25A33	164.858	0.578889	0.218612	2.64803	0.00809634	0.106743	174.095	106.828	5.89973	3.62018
PPP1R14B	3493.64	0.289461	0.109329	2.64761	0.00810632	0.106768	3552.91	2884.07	178.223	144.672
KIAA1161	194.498	-0.518282	0.195819	-2.64674	0.00812714	0.106936	166.151	251.512	1.27637	1.93211
ADAT3	58.4199	-0.654002	0.247152	-2.64616	0.00814121	0.107015	45.048	81.5326	1.37168	2.48261
KDM5B	1327.67	-0.397964	0.150448	-2.64519	0.00816459	0.107031	1290.78	1737.57	10.0121	13.4777
S1PR2	135.838	-0.508826	0.192475	-2.64359	0.00820313	0.107031	129.531	193.222	1.78938	2.66923
PRR34	14.3437	0.748979	0.28321	2.64461	0.00817848	0.107031	19.7875	7.80881	0.533599	0.210576
RUVBL1	1559.45	-0.35791	0.135344	-2.64444	0.00818261	0.107031	1300.5	1693.91	36.4189	47.4357
KCTD20	1163.49	-0.350811	0.132706	-2.64351	0.00820503	0.107031	1065.55	1379.18	9.38881	12.1523
TMEM200A	572.98	0.367925	0.139098	2.64507	0.00816746	0.107031	596.786	454.354	5.28383	4.02277
STARD3NL	1550.77	0.347247	0.131321	2.64426	0.00818697	0.107031	1624.43	1259.05	46.116	35.7434
MYH16	99.3865	0.716161	0.270921	2.64343	0.00820702	0.107031	139.638	65.8544	3.04966	1.43824
DUSP7	515.111	-0.500058	0.189423	-2.6399	0.00829313	0.108047	437.628	649.746	6.70189	9.95028
UBE2B	1070.04	0.392672	0.148771	2.63944	0.00830439	0.108088	1220.07	909.478	22.9333	17.0952
PSTPIP2	201.576	0.620564	0.23526	2.63778	0.00834516	0.108512	260.218	150.349	4.26043	2.46159
CNPY2	2020.46	0.342108	0.129834	2.63496	0.00841464	0.109094	2301.21	1790.67	71.298	55.48
GMPPA	887.341	0.282234	0.107085	2.63562	0.00839842	0.109094	911.666	743.987	24.1246	19.6874
TTYH3	7182.95	-0.281683	0.106896	-2.63512	0.00841087	0.109094	6721.45	8230.98	69.0134	84.5127
SMNDC1	964.811	0.330753	0.125686	2.63158	0.00849895	0.109972	1052.24	826.454	25.6762	20.1667
MZF1-AS1	43.2558	-0.630089	0.239417	-2.63176	0.00849432	0.109972	35.7925	62.2892	0.68001	1.18341
SPCS1	1825.65	0.280947	0.106788	2.63088	0.0085164	0.11009	1967.84	1607.84	89.8791	73.4362
SYNPO	1016.02	-0.465686	0.177045	-2.63033	0.00853028	0.110162	971.319	1392.62	5.82845	8.35646
HIST1H2BJ	31.2902	0.737615	0.28055	2.62917	0.00855924	0.110428	42.9029	17.9738	4.4161	1.85009
LOC148413	342.643	-0.369248	0.14052	-2.62773	0.00859564	0.110646	311.439	409.035	8.82123	11.5856
DAAM2	597.174	-0.538103	0.204773	-2.6278	0.00859379	0.110646	516.923	801.369	4.04123	6.26499
TERF1	757.358	0.33178	0.126272	2.62751	0.00860119	0.110646	829.123	651.041	13.8684	10.8897
PLIN3	4713.75	0.267806	0.101953	2.62676	0.00862032	0.110785	4960.25	4094.01	104.951	86.6224
FXR2	1612.05	0.251749	0.0959082	2.62489	0.00866765	0.111177	1603.18	1339.92	26.5733	22.2096
SEMA3A	1696.62	-0.284039	0.108207	-2.62497	0.00866571	0.111177	1541.74	1891.03	13.4886	16.5446
RNF213	2017.28	-0.501246	0.191056	-2.62356	0.00870162	0.111505	1779.09	2647.58	3.79557	5.64842
MTMR6	1968.66	0.385556	0.147005	2.62274	0.00872261	0.111533	1945.39	1459.32	18.4658	13.8519
MRPS18C	398.229	0.379254	0.144616	2.62249	0.00872904	0.111533	425.429	320.794	19.131	14.4257
PCDH18	141.453	-0.649553	0.247648	-2.62289	0.00871875	0.111533	131.317	234.758	1.09694	1.96103
VPS36	717.594	0.304836	0.116275	2.62167	0.00874999	0.111693	716.645	574.956	7.41204	5.9466
2025-09-15	2777.04	0.381481	0.145554	2.62089	0.00877004	0.111841	3140.39	2363.59	84.5012	63.5991
NOTCH1	710.664	0.440938	0.168332	2.61945	0.00880707	0.112205	708.724	505.448	3.77507	2.69231
SIX2	10.6518	-0.728879	0.278355	-2.61852	0.00883113	0.112296	5.40893	19.5943	0.124326	0.450381
SARAF	4335.13	0.318868	0.121768	2.61865	0.00882792	0.112296	4720.05	3742.36	108.442	85.9797
TMEM39B	317.654	-0.398628	0.152339	-2.61671	0.0088782	0.112491	278.293	375.557	7.57889	10.2277
TGFB2	1271.42	-0.65357	0.249807	-2.6163	0.0088888	0.112491	983.979	1801.78	8.18228	14.9827
NUDT8	37.5534	-0.670942	0.256446	-2.6163	0.00888873	0.112491	23.7585	45.7757	1.44154	2.77742
PLA2G4C	38.8856	0.680419	0.260058	2.61641	0.00888599	0.112491	53.6827	27.6258	1.03539	0.532827
VHL	1057.19	-0.41487	0.158578	-2.61618	0.00889185	0.112491	1017.76	1391.33	11.0504	15.1065
SQSTM1	14920.4	0.459066	0.175486	2.61597	0.00889744	0.112491	19324.3	13549.7	286.798	201.095
SAR1B	1114.32	0.30539	0.116921	2.61194	0.00900308	0.113719	1196.61	959.13	8.90765	7.13983
PPP1R12B	201.829	-0.484123	0.185441	-2.61066	0.00903676	0.114035	176.304	258.214	0.728015	1.06625
STRN3	990.3	0.344014	0.13184	2.60933	0.00907186	0.114261	1064.69	827.303	12.4854	9.7016
UBE2O	867.14	-0.282681	0.108333	-2.60938	0.00907059	0.114261	783.291	960.356	7.24204	8.87913
YTHDC2	704.4	-0.352759	0.135227	-2.60863	0.00909042	0.114277	647.252	839.826	5.08018	6.59166
TMEM164	1094.87	-0.406012	0.155634	-2.60875	0.00908725	0.114277	1104.86	1498.5	9.58342	12.9978
PLEC	7759.48	-0.467292	0.179219	-2.60737	0.00912403	0.114591	6714.65	9659.46	20.1935	29.0497
UBE2I	2905.49	-0.370211	0.14204	-2.60638	0.00915043	0.114814	2545.8	3350.41	37.247	49.019
SPIRE1	1238.42	0.312772	0.120037	2.60563	0.00917048	0.114956	1246.61	993.685	11.1691	8.90298
EPHX4	310.069	0.366496	0.140701	2.60478	0.0091933	0.115025	353.222	269.437	12.1193	9.24461
FBXO22	532.601	0.378255	0.145206	2.60496	0.00918848	0.115025	635.459	479.176	7.31672	5.51727
SNHG12	125.892	-0.637326	0.244856	-2.60286	0.0092449	0.115287	85.9736	154.086	5.75994	10.3232
LINC00639	61.1265	-0.709716	0.272718	-2.60239	0.00925776	0.115287	47.4324	98.6561	0.545379	1.13435
C19orf48	1239.08	-0.503273	0.19338	-2.6025	0.00925457	0.115287	915.024	1368.52	20.1707	30.1675
COX7A2L	1991.64	0.340398	0.130798	2.60246	0.00925567	0.115287	2273.41	1770.9	101.039	78.7058
ZHX3	1376.92	-0.409226	0.157207	-2.6031	0.00923859	0.115287	1145.18	1560.44	5.67494	7.73279
VPS72	511.302	-0.482445	0.185415	-2.60197	0.00926888	0.115293	456.557	666.286	14.4529	21.0922
C1QTNF6	133.514	-0.508241	0.195372	-2.6014	0.00928437	0.115293	124.41	185.93	2.09795	3.13538
NCKIPSD	694.964	-0.409208	0.157294	-2.60155	0.00928034	0.115293	604.719	823.348	9.97998	13.5881
BEND3P3	85.5086	-0.551863	0.212262	-2.59991	0.00932471	0.115578	73.6464	116.115	0.615924	0.971103
SIX3-AS1	158.659	-0.556631	0.214088	-2.6	0.00932226	0.115578	154.224	243.052	6.53184	10.2939
RNF157	193.775	-0.512293	0.197164	-2.59831	0.00936843	0.116011	143.786	217.753	1.45552	2.20426
ARHGAP18	2546.53	-0.336349	0.129469	-2.59792	0.00937909	0.116035	2250.73	2879.7	31.8476	40.7475
CSGALNACT2	973.473	0.472294	0.181836	2.59736	0.00939423	0.116113	1012.07	699.193	13.2948	9.18478
KATNAL1	1299.15	-0.47484	0.182971	-2.59516	0.00945462	0.116583	1038.66	1506.99	6.7055	9.72904
HOXB9	111.408	-0.602446	0.232111	-2.59551	0.00944511	0.116583	94.2551	158.773	1.72838	2.91145
PRRC1	1442.33	-0.418593	0.161326	-2.5947	0.00946742	0.116583	1330.57	1827.42	14.0224	19.2585
FYN	1463.56	0.35488	0.136762	2.59487	0.00946257	0.116583	1575.41	1212.29	20.1237	15.4853
BMS1P6	51.4977	0.614965	0.237464	2.58971	0.00960555	0.11755	51.3926	29.4786	0.541723	0.31073
HERC1	836.061	-0.600821	0.231907	-2.59079	0.00957572	0.11755	667.284	1126.4	2.17395	3.66971
RIOK3	1052.79	0.375824	0.145114	2.58986	0.00960156	0.11755	1209.91	914.376	14.8532	11.2252
ZNF549	99.5066	-0.507587	0.195867	-2.5915	0.00955596	0.11755	93.6971	139.773	1.1257	1.67926
SLC8A1	339.253	-0.465528	0.179767	-2.58963	0.00960802	0.11755	250.078	359.904	1.98294	2.85378
FRYL	1231.05	-0.45194	0.174511	-2.58974	0.00960474	0.11755	1046.49	1484.41	4.42612	6.27832
TAF1	687.804	-0.438927	0.169417	-2.59081	0.00957497	0.11755	604.652	846.733	3.03278	4.24701
ANXA7	4052.29	0.268919	0.103869	2.58901	0.00962516	0.117651	4192.08	3456.91	94.1707	77.6558
VDAC3	2723.66	0.238021	0.091966	2.58814	0.00964971	0.117842	2731.22	2305.63	87.8078	74.1254
TFAP2A	416.049	-0.440942	0.170423	-2.58734	0.0096721	0.118007	376.483	528.124	4.38379	6.14951
ZNF672	362.321	-0.525675	0.203307	-2.58562	0.00972027	0.118485	322.307	493.158	5.16259	7.89922
SBDS	1833.03	0.310313	0.120039	2.58509	0.00973531	0.11856	1757.03	1402.69	54.2002	43.2698
MYCBP2	1135.38	-0.579109	0.224052	-2.58471	0.00974606	0.118582	962.13	1574.6	3.17042	5.18864
SNX3	2741.86	0.269786	0.104498	2.58173	0.00983074	0.119502	2989.17	2462.68	84.0882	69.2777
MAMLD1	242.511	-0.586814	0.227431	-2.58018	0.00987485	0.119928	191.116	316.58	1.94697	3.22511
POLA1	546.691	-0.574241	0.222586	-2.57986	0.00988395	0.119929	412.296	672.846	3.75308	6.12483
PNO1	666.597	0.491508	0.190563	2.57924	0.00990181	0.120036	654.986	443.174	16.3781	11.0817
OAZ1	11469.3	0.229625	0.0890555	2.57845	0.00992448	0.1202	11967.6	10165	501.711	426.143
SETD6	188.119	-0.427	0.165659	-2.57758	0.00994955	0.120284	159.213	220.954	2.6461	3.67222
ZNF180	135.416	-0.472046	0.183132	-2.57762	0.00994823	0.120284	121.877	176.113	1.31579	1.90132
AMY2B	29.4288	0.703688	0.273066	2.57699	0.00996653	0.12038	46.6098	22.3954	1.02929	0.494562
HEXA	3354.96	0.253601	0.098426	2.57657	0.00997872	0.120417	3880.65	3236.82	78.8399	65.7599
CELF6	18.1176	0.731336	0.28392	2.57585	0.00999937	0.120433	24.2614	9.66695	0.335999	0.133878
MGME1	900.662	0.320872	0.124556	2.57612	0.00999163	0.120433	970.117	767.885	19.9879	15.8212
DPH3	842.75	0.346447	0.134512	2.57558	0.0100073	0.120433	901.319	698.554	10.9778	8.50818
RCAN1	474.294	0.344407	0.13399	2.57038	0.0101586	0.122143	476.845	370.294	6.56531	5.09828
LENG8	1306.89	-0.612021	0.23817	-2.56968	0.0101792	0.12219	975.806	1682.9	3.24246	5.59204
MDN1	628.888	-0.634935	0.247093	-2.56962	0.010181	0.12219	482.121	863.38	1.31096	2.34767
SLC26A11	22.9292	0.720798	0.280545	2.56928	0.0101911	0.122201	34.4238	14.9982	0.558251	0.243226
NUMB	1913.14	0.327058	0.127343	2.56833	0.010219	0.122425	1961.62	1544.03	26.6522	20.9786
OBSCN	172.723	-0.535477	0.208679	-2.56604	0.0102868	0.122545	154.028	238.329	0.266383	0.412176
BLM	247.6	-0.660088	0.257236	-2.56607	0.0102857	0.122545	162.29	308.135	1.66323	3.15792
TSHZ1	286.728	-0.337317	0.131471	-2.56572	0.0102962	0.122545	278.014	355.844	2.55848	3.27472
H1F0	35.7425	0.735394	0.286587	2.56604	0.0102867	0.122545	57.5234	21.1875	1.22232	0.450215
BET1	570.433	0.385706	0.150344	2.56549	0.010303	0.122545	687.391	514.887	11.1183	8.3281
FAM206A	326.731	0.38274	0.149141	2.5663	0.0102791	0.122545	361.048	271.048	9.35409	7.02236
PTPN3	72.9658	-0.589785	0.229755	-2.56702	0.0102577	0.122545	49.6927	83.6395	0.251078	0.422598
HNRNPH2	25.1345	-0.713303	0.277982	-2.56601	0.0102877	0.122545	16.4094	36.4996	0.339648	0.755483
SCPEP1	771.257	0.287085	0.111921	2.56508	0.0103152	0.12258	896.989	729.097	22.8331	18.5594
RAD21	8607.56	0.37954	0.147998	2.5645	0.0103325	0.122675	8974.61	6759.04	118.49	89.2383
AP5B1	704.619	-0.388645	0.151576	-2.56402	0.0103467	0.122733	629.054	842.045	4.72248	6.32146
KDM5A	1361.33	-0.459309	0.179176	-2.56345	0.0103637	0.122826	1240.74	1773.09	5.66904	8.10138
CDCA4	769.558	-0.593596	0.231679	-2.56214	0.0104028	0.12296	519.351	874.48	10.4824	17.6502
THAP7	370.488	-0.342812	0.133799	-2.56214	0.0104029	0.12296	325.813	419.593	12.9881	16.7265
ZFAND3	2000.72	0.262467	0.102434	2.56231	0.0103979	0.12296	2103.12	1742.47	31.2411	25.8838
ATAD5	154.42	-0.606236	0.236653	-2.56171	0.0104159	0.123004	109.975	189.158	0.793141	1.36421
BBIP1	493.705	0.323495	0.12638	2.5597	0.0104764	0.123608	547.493	432.339	11.019	8.70135
TAF4	255.702	-0.385813	0.150745	-2.55937	0.0104863	0.123615	212.523	284.086	1.42712	1.90767
CSPG4	2092.7	-0.477829	0.186776	-2.5583	0.0105186	0.123885	1654.7	2412.48	9.88238	14.4081
UNC50	742.643	0.351647	0.137585	2.55586	0.0105925	0.124562	859.531	663.114	37.2643	28.7488
PLK2	11476.4	-0.50682	0.198303	-2.55579	0.0105948	0.124562	11000	16513.3	191.901	288.084
KRIT1	719.414	0.298816	0.116947	2.55515	0.0106143	0.12468	753.279	606.847	7.35317	5.92376
MCL1	4220.69	-0.495694	0.194058	-2.55436	0.0106382	0.124731	3755.31	5574.72	45.5146	67.5661
KRT81	101.423	-0.608024	0.238007	-2.55465	0.0106296	0.124731	79.4204	136.141	2.05871	3.52902
CRTC3	510.966	-0.47312	0.185241	-2.55408	0.0106468	0.124731	434.933	630.956	4.10089	5.94915
SELT	3456.28	0.279673	0.109577	2.55229	0.0107017	0.125042	3371.61	2756.23	47.831	39.101
OCIAD1	2951.49	0.321645	0.126011	2.55251	0.0106948	0.125042	3248.11	2568.03	68.9605	54.5216
BUD31	1041.7	0.394827	0.154685	2.55247	0.0106963	0.125042	1130.79	839.916	53.6778	39.8703
TJP1	1833.25	-0.373634	0.146517	-2.55011	0.0107688	0.125715	1681.56	2221.82	4.86444	6.4273
B3GNT2	434.339	0.378579	0.148487	2.54957	0.0107856	0.125801	428.921	323.177	7.72502	5.82054
DACT1	148.862	0.446678	0.175338	2.54752	0.0108491	0.12643	170.584	120.638	1.91729	1.35592
RAB11B	1706.28	-0.418109	0.164151	-2.54711	0.0108621	0.126469	1542.05	2119.86	46.8965	64.4689
PABPC1L	159.296	-0.535008	0.210138	-2.54598	0.0108972	0.126656	107.779	168.152	2.50643	3.91043
GAL3ST4	44.4177	0.698535	0.274358	2.54607	0.0108944	0.126656	73.2857	35.2163	1.42851	0.686448
HSD17B1	289.052	-0.415813	0.163367	-2.54528	0.0109192	0.1268	271.785	372.052	6.03147	8.2566
MTA3	803.991	-0.330526	0.129879	-2.54486	0.010932	0.126838	790.315	1006.01	5.81929	7.40753
LRP6	1089.83	-0.48749	0.191654	-2.5436	0.0109718	0.127188	1002.14	1475.15	4.92032	7.2427
PHIP	1009.5	-0.53582	0.210685	-2.54322	0.0109836	0.127213	854.654	1329.67	3.53622	5.50166
PTGER2	190.586	-0.439121	0.172743	-2.54205	0.0110204	0.127313	158.258	221.603	3.162	4.42763
INO80C	405.234	0.332289	0.130693	2.54252	0.0110056	0.127313	440.557	345.24	17.7047	13.8742
NAPA	1731.77	0.299367	0.117773	2.54189	0.0110254	0.127313	1911.75	1539	50.8879	40.966
SNX12	1561.1	-0.363916	0.143177	-2.54173	0.0110306	0.127313	1459.86	1912.59	28.3445	37.1346
EPB41L1	747.333	-0.322805	0.127062	-2.54054	0.0110682	0.12745	756.183	956.49	5.54159	7.00952
SEC13	4193.78	0.233551	0.0919332	2.54044	0.0110713	0.12745	4178.4	3538.06	95.1586	80.5756
SURF4	10606.7	0.27498	0.108219	2.54095	0.0110551	0.12745	10441.8	8566.94	152.098	124.788
CMTM4	1239.37	-0.343653	0.135324	-2.53949	0.0111015	0.127687	1111.16	1431.58	6.77764	8.73205
CASP6	587.9	0.331164	0.130422	2.53918	0.0111113	0.127689	649.674	509.531	19.3653	15.1879
FOSL2	2218.73	-0.297231	0.117075	-2.53881	0.0111229	0.127711	2085.28	2586.03	25.869	32.0811
ABCC1	3317.16	-0.356369	0.140413	-2.53801	0.0111484	0.127893	3111.03	4050.31	11.7337	15.2764
C1orf27	435.88	0.387452	0.152683	2.53763	0.0111605	0.127921	464.255	347.174	5.89977	4.4119
RABIF	292.796	-0.491639	0.193837	-2.53635	0.0112013	0.127946	254.963	377.059	3.91178	5.78507
SUFU	905.163	-0.367181	0.144763	-2.53642	0.0111991	0.127946	881.856	1157.75	8.16706	10.7222
CIB1	1870.35	0.245943	0.0969657	2.5364	0.0112	0.127946	1955.72	1640.49	74.028	62.0958
CLINT1	2342.32	0.276214	0.108898	2.53644	0.0111986	0.127946	2360.51	1935.16	28.9283	23.7155
TSPAN10	457.688	0.386811	0.152529	2.53598	0.0112134	0.127974	606.789	454.126	14.032	10.5016
CNTNAP1	1368.51	-0.306849	0.121045	-2.535	0.0112449	0.128049	1206.36	1508.72	10.9511	13.6959
PIAS4	356.475	-0.415642	0.16397	-2.53487	0.011249	0.128049	326.797	448.15	5.04518	6.91866
PPM1B	1185.39	0.349092	0.1377	2.53517	0.0112394	0.128049	1252.53	968.006	11.5074	8.89339
VWA8	535.983	-0.36384	0.143562	-2.53438	0.0112646	0.128117	470.555	617.125	3.14235	4.12114
SLIT3	1157.15	-0.39079	0.15426	-2.53332	0.0112989	0.128396	974.047	1307.32	4.95434	6.64947
DMXL2	619.41	-0.445408	0.175861	-2.53273	0.0113177	0.1285	540.351	763.281	2.52411	3.56547
LINC00920	69.2997	-0.610118	0.241011	-2.53149	0.0113578	0.128652	65.6813	111.572	3.5657	6.05701
LOC100287036	58.5792	-0.55983	0.221107	-2.53195	0.0113432	0.128652	52.7945	84.1315	2.1692	3.45676
VPS25	916.546	-0.480081	0.189649	-2.53142	0.0113602	0.128652	811.241	1185.44	36.4473	53.2594
RSBN1L	255.469	-0.406845	0.160754	-2.53086	0.0113782	0.128746	235.928	320.839	3.62762	4.9332
SHC3	1759.71	-0.304244	0.120274	-2.52958	0.0114198	0.129106	1638.4	2044.2	8.30446	10.3613
BIRC6	1746.86	-0.539152	0.213176	-2.52914	0.0114341	0.129158	1428.1	2234.44	4.50299	7.0455
FZD4	677.769	-0.323994	0.128231	-2.52663	0.0115162	0.129974	715.491	906.187	4.79096	6.06786
KCNMA1	6059.64	-0.24285	0.0961394	-2.52602	0.0115363	0.130091	5678.04	6752.16	18.0195	21.4283
PAK4	2194.32	0.491942	0.194832	2.52496	0.0115712	0.130373	2201.06	1483.59	35.5664	23.973
GCLM	966.154	0.475029	0.18823	2.52366	0.011614	0.130491	1037.69	712.605	10.1736	6.98642
SGPL1	1444.73	-0.398852	0.158042	-2.5237	0.0116126	0.130491	1363.2	1841.99	11.6992	15.8082
LIG4	551.652	0.412001	0.163288	2.52315	0.0116309	0.130491	593.041	433.422	6.74053	4.9263
MARK3	1723.23	0.284842	0.112851	2.52406	0.0116009	0.130491	1756.52	1429.83	24.6363	20.0543
ZUFSP	276.228	0.349782	0.138629	2.52315	0.011631	0.130491	277.251	214.284	6.20843	4.79843
SLF2	1422.41	-0.52553	0.208391	-2.52185	0.0116741	0.130533	1229.42	1892	7.59346	11.6859
MIR4442	115.234	-0.523135	0.207435	-2.52193	0.0116714	0.130533	94.6914	145.371	69.9734	107.424
GLRB	462.219	-0.309328	0.122649	-2.52206	0.0116669	0.130533	409.519	513.373	6.3085	7.90833
GOLPH3	1952	0.333685	0.132338	2.52145	0.0116871	0.130533	2111.01	1652.05	39.0572	30.5657
NELFE	1749.25	0.226841	0.0899669	2.52139	0.0116894	0.130533	1792.22	1525.37	9.47404	8.0634
ULBP2	164.786	0.421736	0.167292	2.52096	0.0117036	0.130533	184.184	133.212	6.47659	4.68424
ARMCX3	1219.6	0.305431	0.121147	2.52116	0.0116968	0.130533	1368.44	1095.57	19.5533	15.6543
GPAT4	2939.23	0.269948	0.107101	2.52049	0.0117193	0.130597	2943.65	2424.68	23.0969	19.0249
PTGFR	503.235	0.394068	0.156534	2.51745	0.0118208	0.130848	607.356	450.958	5.53683	4.11106
TRHDE	763.385	-0.35422	0.140636	-2.51871	0.0117787	0.130848	647.759	842.612	5.77646	7.51408
CLN5	802.816	0.345597	0.137232	2.51834	0.0117909	0.130848	939.959	728.297	16.6207	12.878
NAA30	725.28	0.300165	0.119228	2.51758	0.0118164	0.130848	787.154	633.116	8.70891	7.00467
SKA2	1350.26	-0.394937	0.156862	-2.51773	0.0118114	0.130848	1154.46	1555.97	18.1627	24.4795
BOD1L1	1085.69	-0.461281	0.183201	-2.5179	0.0118057	0.130848	946.25	1358.2	4.44406	6.37881
PAPD7	1080.81	0.408817	0.162361	2.51796	0.0118038	0.130848	1025.45	751.488	12.4224	9.10363
SGK1	741.628	-0.609961	0.242273	-2.51766	0.0118139	0.130848	584.746	1012.52	7.30165	12.6432
TPR	3607.93	-0.437374	0.17388	-2.51537	0.0118906	0.131511	3002.62	4210.04	15.3164	21.4755
MYL6	26683.7	-0.334485	0.133012	-2.51471	0.0119131	0.131651	22873.9	29251	1399.87	1790.15
C4orf46	733.597	-0.597297	0.237585	-2.51404	0.0119357	0.13179	544.624	927.059	7.22137	12.2922
TDRD7	505.036	0.351296	0.139771	2.51336	0.0119587	0.131934	568.071	438.203	7.47621	5.76706
LYAR	527.311	0.48565	0.193264	2.51288	0.0119751	0.132005	439.871	298.219	13.569	9.19937
MECP2	1411.23	-0.317204	0.126301	-2.51149	0.0120221	0.132413	1302.83	1642.86	6.29857	7.94247
GIT2	1062.37	-0.402316	0.160227	-2.51091	0.012042	0.132445	906.937	1230.65	7.00295	9.50248
ELF2	443.578	-0.334365	0.13317	-2.51082	0.012045	0.132445	420.586	537.164	5.84927	7.47058
PKI55	308.964	-0.608819	0.242508	-2.51051	0.0120557	0.132452	257.373	444.766	3.85673	6.66483
EPM2AIP1	746.479	-0.328562	0.130909	-2.50986	0.0120779	0.132586	738.276	938.981	4.91362	6.24942
POLR1B	528.496	-0.406569	0.162061	-2.50874	0.0121161	0.132787	438.604	597.633	3.94612	5.37691
SEC24A	1263.98	0.389643	0.15531	2.50882	0.0121137	0.132787	1335.37	995.713	9.36601	6.98374
CYP4V2	400.178	0.302758	0.120696	2.50843	0.012127	0.132796	458.39	368.03	4.82465	3.87359
SNX27	507.454	-0.394618	0.157368	-2.5076	0.0121553	0.132995	478.792	644.293	3.34584	4.50237
PPP4R3B	1835.13	0.312794	0.124803	2.5063	0.0122003	0.133378	1986.54	1581.49	17.5351	13.9598
INO80D	306.144	-0.517922	0.206764	-2.5049	0.0122487	0.133796	271.371	413.853	0.95046	1.4495
PHF13	551.336	-0.406206	0.162323	-2.50246	0.0123335	0.13439	523.631	712.117	7.0641	9.60689
THAP3	242.726	0.367994	0.147046	2.50259	0.0123289	0.13439	261.151	198.314	4.35051	3.30371
TP53INP1	1108.39	0.525513	0.209961	2.50291	0.0123178	0.13439	1613.07	1048.05	14.1302	9.18069
ZNF738	89.771	-0.545281	0.218032	-2.50093	0.0123869	0.134812	69.2152	109.757	0.292371	0.463625
KLC3	175.282	-0.515042	0.205954	-2.50076	0.0123926	0.134812	119.259	182.634	3.29313	5.04312
MAD2L1	2320.38	0.46667	0.186647	2.50028	0.0124096	0.134887	2319.03	1604.28	79.9557	55.3125
UBQLN4	1111.18	-0.404837	0.161965	-2.49953	0.0124357	0.13495	957.005	1302.01	13.1106	17.8371
CMAHP	15.0026	0.714941	0.286005	2.49975	0.012428	0.13495	17.9743	6.56188	0.262512	0.0958355
CDC16	1871.47	0.24181	0.0968078	2.49784	0.0124954	0.135428	1914.35	1610.97	41.3346	34.7841
BCAT2	583.78	-0.329669	0.131989	-2.4977	0.0125003	0.135428	502.861	640.971	11.9697	15.2571
KLHL17	270.621	-0.551758	0.221018	-2.49644	0.0125447	0.135798	209.884	334.866	4.05283	6.46622
ADGRV1	134.118	-0.641184	0.257097	-2.49393	0.0126336	0.136649	99.3909	183.973	0.254533	0.471142
COL4A2	9315.88	-0.455685	0.18285	-2.49212	0.0126983	0.13668	7763.16	11092.3	61.3696	87.6873
ARHGAP11B	214.176	0.615895	0.24708	2.4927	0.0126777	0.13668	204.812	115.101	2.49394	1.40155
MRPL34	535.68	0.323551	0.129817	2.49236	0.0126896	0.13668	602.66	475.841	30.8244	24.338
HSD17B14	329.11	0.363895	0.145955	2.49321	0.0126594	0.13668	426.526	325.326	17.0716	13.0211
CD109	2605.62	-0.290157	0.116406	-2.49264	0.0126797	0.13668	2544.37	3138.72	13.7631	16.978
AP4M1	294.307	-0.339673	0.13628	-2.49247	0.0126857	0.13668	273.923	351.545	7.26021	9.31756
ORC6	967.65	0.51054	0.20492	2.49142	0.0127235	0.136784	888.689	584.713	26.0815	17.1603
CHD3	5721.87	-0.314051	0.12606	-2.49127	0.0127286	0.136784	5431.04	6830.71	35.3622	44.4755
SFR1	282.711	0.384083	0.154224	2.49042	0.0127593	0.136891	323.764	242.618	10.4838	7.85622
NDC80	1887.02	0.559357	0.224581	2.49067	0.0127502	0.136891	1967.36	1216.12	44.8458	27.7213
C1orf109	444.919	0.391139	0.1572	2.48816	0.0128407	0.137016	436.218	324.758	8.46624	6.30299
LEPROT	2415.78	0.329157	0.13234	2.48721	0.0128749	0.137016	2744.44	2155.1	26.5336	20.8358
KAT6B	1042.78	-0.380388	0.152962	-2.48681	0.0128894	0.137016	986.538	1312.46	5.74703	7.6457
VPS33B	278.666	-0.4136	0.166339	-2.48648	0.0129013	0.137016	245.254	335.768	4.36001	5.96914
DBF4B	763.783	0.521093	0.209572	2.48646	0.0129019	0.137016	746.105	484.682	7.15892	4.65055
EIF4A3	1423.23	-0.357735	0.143722	-2.48907	0.0128077	0.137016	1242.21	1620.85	35.4686	46.2796
SEMA6B	910.939	-0.479115	0.192684	-2.48653	0.0128995	0.137016	814.956	1192.55	10.2356	14.9781
ZNF264	220.978	-0.413619	0.166265	-2.48771	0.0128567	0.137016	215.978	295.399	0.879158	1.20245
THADA	536.946	-0.351948	0.14147	-2.48778	0.0128542	0.137016	476.343	619.078	3.47539	4.51678
BZW1	7927.2	0.292923	0.117772	2.4872	0.0128752	0.137016	8217.62	6644.93	110.891	89.6686
SACM1L	1338.2	0.405052	0.162918	2.48623	0.0129105	0.137016	1409.68	1035.96	18.8276	13.8362
ATG3	1319.9	0.28342	0.114003	2.48608	0.0129157	0.137016	1384.52	1128.32	22.4014	18.256
SYNE1	1040.46	-0.53766	0.216065	-2.48842	0.0128311	0.137016	874.329	1369.64	1.55223	2.43157
KPNA7	14.7248	0.709199	0.28491	2.48921	0.0128028	0.137016	24.9196	10.5711	0.732215	0.310612
RAB2B	296.159	-0.447539	0.180105	-2.48488	0.0129596	0.137372	283.919	401.248	4.68253	6.61758
PIANP	174.456	-0.584714	0.235428	-2.48362	0.0130054	0.137747	156.637	260.307	2.55525	4.24643
LUZP2	153.79	0.513625	0.206843	2.48316	0.0130223	0.137816	184.55	121.118	1.72497	1.13208
CD46	3507.63	0.232239	0.0935594	2.48227	0.013055	0.138003	3891.87	3298.32	56.79	48.129
CRKL	1640.21	-0.308603	0.124331	-2.48211	0.0130609	0.138003	1443.59	1807.91	13.4221	16.8095
SNORA62	15.6783	-0.70617	0.284563	-2.48159	0.0130797	0.138093	9.07658	22.1931	2.91809	7.135
CAPN12	31.9823	0.656016	0.264497	2.48024	0.0131294	0.138507	34.4384	17.5736	0.544922	0.278068
UBE2Q1	1498.18	0.272246	0.109809	2.47927	0.0131652	0.138774	1601.11	1316.16	24.5957	20.2183
PPP2R2D	1068.58	0.25079	0.101167	2.47897	0.0131761	0.138779	1042.12	871	7.49066	6.26069
TM9SF4	2051.27	-0.239083	0.0965016	-2.4775	0.0132306	0.139242	1898.64	2252.26	23.6307	28.0318
CKAP5	3904.65	-0.588847	0.237751	-2.47674	0.013259	0.13943	2875.83	4859.13	21.207	35.8323
NOL7	1207.27	0.310671	0.125541	2.47466	0.0133364	0.140133	1160.48	925.283	65.7392	52.4156
DESI2	1284.88	-0.351286	0.142004	-2.47378	0.0133693	0.140367	1147.78	1489.65	13.8738	18.0062
ATM	1088.44	-0.530578	0.21452	-2.47333	0.0133862	0.140374	957.598	1487.98	3.60624	5.60363
ZNF619	100.152	-0.505147	0.204272	-2.47291	0.0134017	0.140374	90.4874	136.102	1.07076	1.61054
LAMB1	11606.8	-0.387709	0.156771	-2.47309	0.0133951	0.140374	10653.9	14272.3	90.2296	120.874
CTNND1	167.667	-0.44412	0.179667	-2.47191	0.0134395	0.140658	148.556	209.804	1.15828	1.63582
SMG1P7	27.1247	-0.696015	0.281632	-2.47136	0.01346	0.14074	14.4874	34.0858	0.379311	0.89244
ZNF224	38.2252	-0.612076	0.24771	-2.47093	0.013476	0.14074	30.4866	53.0964	0.607897	1.05873
RAPH1	1552.46	-0.536324	0.21706	-2.47085	0.0134792	0.14074	1211.38	1900.09	5.71147	8.95862
RRN3	1203.06	0.358036	0.144979	2.46957	0.0135274	0.141133	1218.9	934.071	7.97939	6.11481
SETD2	1492.52	-0.339081	0.137336	-2.46898	0.0135498	0.141254	1353.58	1738.65	7.94691	10.2077
SACS	2447.52	-0.504786	0.204511	-2.46825	0.0135774	0.141423	1728.73	2612.25	5.39662	8.15473
CEP135	460.287	0.427131	0.173073	2.46793	0.0135899	0.141423	466.94	336.048	4.03111	2.90112
RSPO3	24.1497	0.663234	0.268765	2.46771	0.0135979	0.141423	48.4359	13.1388	0.523256	0.14194
SUSD6	432.533	0.520214	0.210854	2.46717	0.0136184	0.141525	567.572	369.489	5.21061	3.3921
ATF2	1246.15	0.310501	0.125949	2.4653	0.0136899	0.142156	1383.69	1103.09	14.1194	11.2561
CRTC2	818.569	0.305499	0.124017	2.46336	0.0137643	0.142201	860.666	689.001	15.9119	12.7382
PARVA	4069.64	-0.29241	0.11871	-2.46322	0.0137694	0.142201	3783.05	4677.91	21.4819	26.5633
GOLGA5	1109.34	0.384008	0.155839	2.46413	0.0137345	0.142201	1235.2	924.636	20.6119	15.4295
C16orf70	327.081	-0.393786	0.159788	-2.46443	0.0137232	0.142201	305.481	411.434	5.32367	7.17012
DCBLD2	34190.8	-0.287603	0.116746	-2.46349	0.0137594	0.142201	33171.1	40854.7	269.541	331.977
SNAPC3	805.168	0.275468	0.111782	2.46433	0.0137268	0.142201	831.453	681.332	13.3007	10.8992
DCAF10	644.644	-0.352485	0.143081	-2.46354	0.0137573	0.142201	598.038	776.865	3.69422	4.79888
RER1	2799.34	0.226996	0.0922471	2.46074	0.0138653	0.142969	2780.18	2365.42	44.3455	37.7298
KIAA1958	118.203	-0.490039	0.199143	-2.46074	0.0138651	0.142969	96.4748	143.747	0.624218	0.93008
BCAS2	757.53	0.322697	0.131178	2.46	0.0138938	0.143041	796.298	628.499	30.3037	23.918
ZNF202	244.22	0.415287	0.168806	2.46015	0.013888	0.143041	249.903	181.915	2.76859	2.01537
ATG12	1213.04	0.299964	0.121966	2.4594	0.0139168	0.143166	1294.96	1041.06	14.0539	11.2984
TMEM132B	81.9936	0.497927	0.202497	2.45894	0.013935	0.143197	112.327	75.2878	0.501522	0.336147
ABHD10	594.647	-0.3737	0.151987	-2.45877	0.0139414	0.143197	529.039	700.445	9.33463	12.359
TTLL4	395.53	-0.475529	0.19345	-2.45815	0.0139654	0.143332	297.324	435.326	2.94649	4.31409
TESK1	761.166	0.350885	0.142801	2.45715	0.0140043	0.14362	779.579	600.815	15.3408	11.823
MORC4	1012.32	-0.416487	0.169534	-2.45666	0.0140235	0.143706	981.995	1350.22	12.681	17.4361
ANXA5	16848.4	0.236314	0.0962111	2.45621	0.0140412	0.143776	17650	14910.1	546.506	461.668
IL4R	1107.45	0.292835	0.119305	2.45451	0.0141077	0.144345	1177.04	951.371	14.8172	11.9763
AHCYL1	3422.34	-0.256915	0.104769	-2.45221	0.0141982	0.145047	3393.3	4080.45	33.8172	40.6653
ZNF749	81.4886	-0.478923	0.1953	-2.45224	0.0141969	0.145047	72.2436	105.834	1.22117	1.78897
AGAP9	60.9309	0.55436	0.226314	2.44951	0.0143049	0.146025	55.7297	34.3222	1.15593	0.711902
UGGT1	3540.88	-0.397497	0.1624	-2.44764	0.0143797	0.146675	3120.85	4221.7	14.0981	19.071
CEP170B	2228.32	0.383462	0.156732	2.4466	0.014421	0.146983	2040.16	1527.19	14.8325	11.1031
MESP1	18.4767	-0.681304	0.278591	-2.44554	0.0144636	0.147191	12.9452	27.7195	0.551568	1.18107
PLEKHA3	589.13	0.347404	0.142048	2.44568	0.0144578	0.147191	622.673	481.085	12.4864	9.64713
RAB30	321.799	-0.443761	0.181557	-2.4442	0.0145176	0.147627	300.039	423.853	1.42645	2.0151
MSH2	1105.98	-0.388714	0.159124	-2.44283	0.0145724	0.148071	922.746	1239.23	14.2367	19.1197
VASH1	217.997	-0.446097	0.182672	-2.44207	0.0146033	0.148271	207.019	292.648	1.69977	2.40285
IGSF3	430.426	-0.554054	0.227026	-2.44048	0.0146677	0.148517	380.603	611.334	2.57184	4.13095
GTSE1	2173.98	0.560193	0.229553	2.44037	0.0146723	0.148517	2212.76	1356.48	35.2039	21.5809
MBOAT1	53.6105	-0.572031	0.234329	-2.44114	0.0146408	0.148517	47.3895	77.7087	0.543372	0.891014
ZNF92	131.286	-0.446673	0.183029	-2.44045	0.014669	0.148517	119.696	169.436	1.77326	2.51013
MTFR2	101.96	-0.691128	0.283314	-2.43944	0.01471	0.148784	58.676	137.283	1.62023	3.79084
LOC171391	71.2432	-0.53903	0.221123	-2.4377	0.0147812	0.149174	57.5193	90.4705	2.9089	4.57532
FAT1	4498.3	-0.597523	0.245121	-2.43767	0.0147823	0.149174	3255.57	5623.77	10.9174	18.8591
ASAH1	1618.33	0.347525	0.142556	2.43781	0.0147766	0.149174	2024.87	1564.99	33.8462	26.1592
SMIM15	1282.96	0.328128	0.134783	2.4345	0.0149123	0.150371	1309.92	1028.99	22.441	17.6283
ABHD15	309.853	-0.321337	0.132031	-2.43379	0.0149415	0.150551	285.435	361.688	4.21222	5.33752
IKZF5	449.962	0.33902	0.139319	2.43341	0.0149575	0.150598	512.507	398.654	5.27646	4.1043
CERS2	5878.21	0.232207	0.0954863	2.43183	0.0150226	0.150909	6083.65	5155.22	118.398	100.329
CHTOP	1499.24	-0.318642	0.131012	-2.43215	0.0150095	0.150909	1387.85	1752.83	31.7235	40.0663
KMT2A	1273.1	-0.567279	0.233263	-2.43193	0.0150188	0.150909	1066.42	1749.89	3.18181	5.22103
ARHGAP17	1322	0.327833	0.134876	2.43062	0.0150729	0.150957	1331.62	1046.22	18.7887	14.7617
RALB	1755.44	0.260121	0.106982	2.43144	0.0150388	0.150957	1821.87	1511.14	39.8946	33.0903
GTF2E1	389.371	0.336765	0.138529	2.43101	0.0150569	0.150957	398.727	310.904	6.50879	5.07518
CLCN4	454.478	-0.365939	0.150548	-2.43071	0.0150692	0.150957	394.965	519.416	2.88081	3.78853
ABLIM3	2340.23	-0.258416	0.106338	-2.43014	0.015093	0.151044	2298.07	2766.73	23.813	28.6694
EID2	282.293	-0.37291	0.153505	-2.42929	0.0151282	0.151282	269.751	356.485	9.58757	12.6703
GSG2	183.474	-0.644149	0.265232	-2.42862	0.0151563	0.151432	113.098	218.54	2.00269	3.86982
SFT2D1	865.899	0.295431	0.121657	2.42839	0.0151661	0.151432	895.694	722.618	39.7012	32.0297
SH3BP5L	1289.24	0.32183	0.132596	2.42714	0.0152182	0.151839	1193.63	942.131	18.5723	14.6591
POMP	1918.89	0.388778	0.160248	2.42609	0.0152623	0.152164	2190.57	1631.48	74.2342	55.2879
CDCA7L	963.24	-0.290373	0.119703	-2.42577	0.0152758	0.152183	842.642	1041.12	14.085	17.4025
SGPP1	699.593	0.312583	0.128964	2.4238	0.0153592	0.152743	744.152	592.158	10.9457	8.71005
CCNG1	3919.98	0.401913	0.165809	2.42395	0.0153529	0.152743	4916.32	3617.72	98.6262	72.5751
MTRF1L	595.418	0.289751	0.119597	2.42273	0.0154046	0.152743	623.361	505.297	7.60545	6.16498
ZC3HC1	504.117	0.327978	0.135374	2.42276	0.0154029	0.152743	525.245	412.511	12.8866	10.1207
PAXIP1-AS1	56.9753	-0.61059	0.252032	-2.42267	0.0154069	0.152743	49.66	86.5365	1.08265	1.8866
MATN2	315.784	-0.461345	0.190439	-2.42254	0.0154126	0.152743	286.235	412.716	3.44977	4.97415
ZNF623	356.516	-0.43404	0.179099	-2.42347	0.015373	0.152743	335.321	469.275	1.91531	2.68044
SMS	5152.49	0.326476	0.134797	2.42199	0.0154358	0.152858	5084.6	3997.99	136.89	107.636
PARP9	554.424	0.500702	0.206787	2.42134	0.0154636	0.152905	783.349	520.821	4.86198	3.23256
SNX9	2878.11	0.279625	0.115482	2.42138	0.0154619	0.152905	3174.44	2592.66	36.6274	29.9147
SNORA73B	17.2894	-0.693296	0.286533	-2.4196	0.0155377	0.153168	9.61843	25.1731	3.01401	7.88817
PGM1	1516.52	-0.424821	0.175527	-2.42026	0.0155093	0.153168	1366.28	1897.16	20.1685	28.0052
NF1	1910.61	-0.455274	0.188143	-2.41983	0.0155277	0.153168	1704.9	2442.22	6.36581	9.11883
NIFK	595.593	0.344727	0.142487	2.41936	0.015548	0.153168	553.974	429.178	15.7811	12.226
UTP14A	567.247	0.358241	0.148035	2.41997	0.0155216	0.153168	578.026	442.701	11.1791	8.56186
ASH1L	1133.65	-0.431876	0.178632	-2.41769	0.0156194	0.153462	1027.72	1437.65	4.32163	6.0454
ENO2	3212.51	-0.464388	0.192107	-2.41734	0.0156344	0.153462	2742.28	3966.8	56.0345	81.0558
PXN-AS1	30.6524	-0.611408	0.252872	-2.41785	0.0156123	0.153462	25.1294	44.4061	1.63063	2.88148
GAPDHS	40.4079	-0.616242	0.254929	-2.41731	0.0156358	0.153462	29.6453	53.1186	0.983749	1.76269
DDX31	358.903	0.377382	0.156077	2.41792	0.0156094	0.153462	340.493	256.426	4.45272	3.35336
PPP2R5B	377.641	0.430025	0.177918	2.41699	0.0156496	0.153485	407.87	291.635	7.34321	5.25055
CNOT6L	595.561	-0.295507	0.122333	-2.4156	0.0157094	0.153957	601.734	745.73	3.36065	4.16486
CASP2	601.751	-0.551965	0.228682	-2.41368	0.0157923	0.154655	478.407	770.879	5.43885	8.76386
CHEK2	250.584	-0.489961	0.203048	-2.41304	0.0158203	0.154814	196.582	293.53	4.63249	6.91709
CYB5D1	279.961	-0.354388	0.146899	-2.41246	0.0158452	0.154899	250.635	326.799	3.31261	4.31927
AFF3	813.111	-0.296969	0.123106	-2.4123	0.0158523	0.154899	792.148	983.394	4.77589	5.92893
SYNC	844.615	0.283665	0.11761	2.41192	0.0158686	0.154944	928.827	756.151	13.1654	10.7178
CDH10	98.6724	0.660743	0.274037	2.41115	0.0159023	0.155159	152	75.7231	2.19021	1.09112
ANGEL1	286.817	-0.402399	0.166911	-2.41087	0.0159146	0.155164	268.022	363.715	3.2279	4.38038
TMEM109	1690.42	-0.466748	0.193631	-2.4105	0.0159306	0.155206	1408.44	2044.4	29.2013	42.3867
MCM4	3544.9	-0.526682	0.218602	-2.40932	0.0159822	0.155595	2679.34	4177.52	26.99	42.0816
SETD8	1381.33	0.386917	0.160613	2.409	0.0159964	0.155618	1331.31	992.815	23.96	17.868
NXPH3	10.4409	-0.681836	0.283225	-2.4074	0.0160667	0.156188	6.729	19.0157	0.0600066	0.169574
LYSMD3	888.807	0.366809	0.152391	2.40703	0.0160827	0.156229	961.205	729.73	11.1661	8.47707
RAB23	513.107	-0.427178	0.177552	-2.40593	0.0161313	0.156586	412.178	574.92	4.09947	5.71808
GSTO1	4697.68	0.339151	0.140986	2.40556	0.0161476	0.156629	5069.92	3943.05	191.614	149.025
UAP1	3210.36	0.336192	0.139827	2.40434	0.0162017	0.156824	2583.01	2013.81	54.9575	42.8469
ZNF772	194.849	-0.374522	0.15574	-2.40479	0.0161818	0.156824	194.85	257.72	1.78024	2.35465
PLSCR1	656.096	0.44255	0.184066	2.40431	0.0162032	0.156824	857.192	606.152	19.2036	13.5796
FIZ1	175.715	-0.503537	0.209566	-2.40276	0.0162719	0.157329	155.323	234.571	2.89102	4.36606
PDE1C	598.592	-0.563755	0.234644	-2.4026	0.0162791	0.157329	395.805	653.216	2.83761	4.68304
C1orf52	388.527	0.324518	0.135092	2.40219	0.016297	0.157388	395.955	311.784	5.78287	4.55357
STX8	264.665	0.320653	0.133531	2.40133	0.0163356	0.15753	294.821	232.688	15.0793	11.9014
CAD	2044.44	-0.485469	0.202145	-2.40158	0.0163243	0.15753	1541.23	2287.19	10.7263	15.9179
HEATR3	277.78	-0.421563	0.175576	-2.40102	0.0163493	0.157548	233.446	323.541	4.43175	6.14213
ANAPC10	212.973	0.359559	0.149859	2.39931	0.0164261	0.158173	238.125	182.118	6.0367	4.61688
CMC1	418.149	0.29912	0.124694	2.39883	0.0164475	0.158264	445.856	358.561	35.3193	28.404
NPAS1	31.7229	0.642016	0.267678	2.39846	0.0164641	0.158308	41.9699	21.648	1.01711	0.524622
ZNF706	1057.28	0.288496	0.120298	2.39819	0.0164765	0.158313	1111.65	901.481	17.6688	14.3283
NOTCH2NL	672.531	0.283005	0.118048	2.39738	0.0165128	0.158547	696.533	567.497	6.47741	5.27744
CEBPB	523.63	0.487369	0.203416	2.39592	0.0165786	0.159064	696.847	469.219	16.359	11.0153
NMNAT2	711.152	-0.376811	0.157334	-2.39497	0.0166215	0.159245	685.209	910.162	5.88466	7.81658
BAX	2124.35	0.356923	0.149022	2.3951	0.016616	0.159245	2496.68	1911.61	94.7218	72.5247
FAM111A	1158.53	-0.510603	0.213279	-2.39406	0.0166628	0.15941	930.136	1422.12	11.6852	17.866
FGFRL1	2017.26	-0.390311	0.163024	-2.39419	0.0166571	0.15941	1797.13	2417.74	27.4874	36.9798
GDNF	115.47	0.6489	0.271106	2.39353	0.0166873	0.159529	125.491	62.4581	1.48604	0.739616
HEXB	3885.9	0.301064	0.125803	2.39315	0.0167046	0.159579	4404.05	3534.99	89.4734	71.8175
ECT2	4337.32	0.476274	0.199064	2.39257	0.0167307	0.159713	4359.03	2965.82	47.9595	32.6309
KIN	263.135	0.390124	0.163105	2.39185	0.0167635	0.159904	280.678	208.661	2.17337	1.61572
YTHDC1	1717.39	0.261306	0.10926	2.39161	0.0167748	0.159904	1732.38	1435.45	6.86276	5.68651
CRELD2	926.588	0.360868	0.150941	2.39078	0.0168127	0.16015	874.809	667.281	25.1086	19.1521
STARD8	746.654	-0.514779	0.215366	-2.39025	0.0168369	0.160265	563.292	866.784	5.43325	8.36059
POLR3B	279.472	-0.427793	0.179023	-2.38959	0.016867	0.160436	239.415	334.42	2.68544	3.75109
HSDL1	858.203	0.258469	0.108191	2.38901	0.0168941	0.160578	963.672	799.994	13.0076	10.7983
SSU72	1528.9	0.290875	0.121969	2.38482	0.0170875	0.160929	1604.83	1298.86	60.9792	49.353
SDHB	1428.7	0.3009	0.126134	2.38555	0.0170534	0.160929	1533.05	1230.73	66.0594	53.0321
MMS19	2142.78	-0.31399	0.131612	-2.38572	0.0170455	0.160929	1969.27	2479.31	25.7595	32.4311
LRIG3	257.959	-0.446851	0.187306	-2.38568	0.0170477	0.160929	247.61	351.272	2.91888	4.14087
NBEA	1147.86	-0.367512	0.153932	-2.3875	0.0169636	0.160929	1195.37	1574.63	5.27952	6.95456
PTRF	9099.93	-0.312838	0.13113	-2.38572	0.0170458	0.160929	7734.33	9730.77	105.374	132.574
SUV420H2	87.9101	-0.624314	0.261775	-2.38492	0.0170827	0.160929	69.2854	126.874	1.48565	2.72048
TENM3	1900.44	-0.387358	0.162327	-2.38628	0.0170197	0.160929	1652.63	2218.72	7.56917	10.1619
NUS1	1756.47	0.35303	0.148027	2.38491	0.0170833	0.160929	1738.17	1335.23	17.9026	13.7524
LFNG	62.4473	-0.534129	0.223973	-2.38479	0.0170888	0.160929	63.8094	99.0535	1.00134	1.55442
ZFAND1	533.087	0.317939	0.133308	2.38499	0.0170795	0.160929	549.91	435.073	11.884	9.4023
ZBTB26	105.914	-0.467496	0.195829	-2.38726	0.0169743	0.160929	97.8769	141.683	2.17015	3.14142
FUBP3	1933.05	0.289252	0.121171	2.38714	0.0169798	0.160929	1988.11	1611.16	31.1791	25.2674
DNAJB11	1933.96	0.334062	0.140137	2.38383	0.0171335	0.161235	1793.6	1400.48	52.5145	41.0043
LHX9	19.6679	-0.680862	0.28572	-2.38297	0.0171737	0.161382	14.8475	33.791	0.286035	0.650976
CMTR2	677.454	0.353626	0.148413	2.38271	0.0171856	0.161382	775.933	595.929	9.10136	6.98999
OSTC	2142.78	0.452989	0.190076	2.38321	0.0171626	0.161382	2405.75	1679.22	103.394	72.1693
ZNF195	271.746	0.376518	0.158171	2.38045	0.0172916	0.162261	298.197	224.362	3.98701	2.99981
TNFRSF12A	7071.09	0.346413	0.145586	2.37945	0.0173387	0.162589	6521.53	5037.89	312.873	241.694
TIRAP	140.944	-0.452744	0.190314	-2.37894	0.0173626	0.162698	123.234	176.178	2.45528	3.51012
ADAMTS10	285.992	-0.578193	0.243105	-2.37837	0.0173895	0.162834	247.886	416.268	2.81232	4.72265
CHD4	7579.69	-0.276395	0.116238	-2.37784	0.0174145	0.162936	7182.27	8774.27	54.3312	66.3742
PAQR8	294.342	-0.435246	0.18306	-2.37762	0.0174249	0.162936	271.365	381.185	2.83567	3.98326
PSMD11	2320.54	-0.333755	0.140399	-2.37718	0.0174454	0.163012	1924.1	2464.37	23.709	30.3665
PTGER4	162.48	-0.601269	0.252962	-2.37691	0.0174581	0.163016	118.719	209.608	1.72018	3.03711
EPC1	453.177	-0.340489	0.143276	-2.37646	0.0174797	0.163102	436.851	562.239	4.34225	5.58858
PTS	492.389	0.372627	0.156829	2.37601	0.0175012	0.163188	490.068	370.034	25.9781	19.6152
SARM1	413.849	-0.449762	0.189524	-2.37311	0.017639	0.164358	335.058	478.942	2.27307	3.2492
LOC613037	19.1309	0.667683	0.2815	2.37188	0.017698	0.164791	20.1505	8.69759	0.288758	0.124637
WIPF2	1196.05	-0.270043	0.113867	-2.37156	0.0177132	0.164817	1111.65	1351.26	9.96166	12.1089
SLC7A8	265.543	0.442459	0.186596	2.37121	0.0177299	0.164857	377.182	266.352	3.81969	2.69733
C19orf47	231.034	-0.484278	0.204284	-2.37061	0.0177588	0.164895	186.885	277.429	4.12519	6.12379
INPP1	623.322	0.330944	0.139593	2.37078	0.0177505	0.164895	627.648	491.365	14.3667	11.2472
TMEM263	2611.83	0.377456	0.159284	2.3697	0.0178025	0.165184	2891.5	2172.58	42.4932	31.9281
TRIM5	680.182	-0.404706	0.170867	-2.36854	0.0178585	0.165423	634.099	864.931	8.5801	11.7035
MSH6	2136.65	-0.398337	0.168158	-2.36882	0.0178447	0.165423	1774.55	2408.7	19.6157	26.6256
CCAR2	2443.81	-0.276959	0.11694	-2.36839	0.0178657	0.165423	2231.97	2728.57	26.2984	32.1496
VAMP3	3333.76	0.257446	0.108738	2.36759	0.0179044	0.165666	3602.9	2993.1	80.8987	67.2063
CAPN3	39.2679	0.663445	0.280306	2.36686	0.0179396	0.165875	59.6825	28.1838	0.806913	0.381047
SPATA13	377.894	-0.359722	0.152003	-2.36655	0.0179549	0.165901	318.957	417.771	1.46193	1.91484
TAGLN2	18220.3	-0.23201	0.0980496	-2.36625	0.0179695	0.16592	17147.5	20239.7	484.026	571.311
KIFAP3	445.542	-0.411591	0.173998	-2.36549	0.0180061	0.166142	428.045	587.162	4.63432	6.35703
LMBRD2	162.599	-0.447332	0.189185	-2.36452	0.0180536	0.166465	147.306	209.885	2.25308	3.21023
AAED1	200.999	0.376036	0.159077	2.36385	0.0180859	0.166647	226.674	170.533	9.16144	6.89239
FAM86B3P	30.2357	-0.631926	0.267377	-2.36343	0.0181068	0.166723	17.5034	34.2405	0.339578	0.664289
HPSE	100.714	-0.479823	0.203045	-2.36313	0.0181212	0.166741	82.0757	121.432	0.860934	1.27376
ARHGEF10L	602.308	-0.35627	0.150821	-2.36221	0.0181665	0.167041	582.594	759.895	6.41845	8.37178
PHF11	213.632	0.45584	0.193018	2.36164	0.0181941	0.167179	234.269	162.595	6.09819	4.23248
IRF2BP2	1861.36	-0.339866	0.144011	-2.36	0.0182748	0.167456	1812.88	2332.72	19.2487	24.7682
PRDM11	78.0817	-0.505651	0.214192	-2.36074	0.0182386	0.167456	67.4188	102.659	0.294507	0.448448
WIZ	1028.81	-0.383633	0.162539	-2.36026	0.0182623	0.167456	905.694	1212.34	10.7585	14.4011
EIF2S2	3589.88	0.27896	0.118187	2.36032	0.0182592	0.167456	3564.86	2911.98	68.0933	55.6226
EDA2R	133.157	0.591018	0.250472	2.35962	0.0182939	0.167515	184.768	106.674	2.55173	1.47321
RNF169	423.759	-0.42323	0.179446	-2.35853	0.0183475	0.167519	375.902	522.538	2.37902	3.30706
CCDC77	631.88	0.473948	0.200994	2.35802	0.0183728	0.167519	687.368	468.222	13.591	9.25796
GLI1	55.3326	-0.643387	0.272904	-2.35756	0.0183955	0.167519	47.3631	90.9511	0.648141	1.24462
FAAP100	769.334	-0.351292	0.148987	-2.35786	0.0183806	0.167519	678.33	882.048	8.72551	11.346
FBL	3086.31	-0.258586	0.109656	-2.35817	0.0183654	0.167519	2630.9	3170.39	111.809	134.736
ALS2CL	71.6708	0.526728	0.22342	2.35757	0.018395	0.167519	75.1024	47.6953	0.662573	0.420781
FNTA	852.562	0.26062	0.1105	2.35854	0.018347	0.167519	896.399	742.714	26.199	21.7073
PRRC2B	5106.59	-0.377424	0.160007	-2.3588	0.0183343	0.167519	4564.78	6075.64	20.4362	27.2003
TCAIM	745.884	0.330887	0.140385	2.35701	0.0184229	0.167615	831.432	650.48	7.52415	5.8866
DAP	3955.3	0.251334	0.10664	2.35684	0.0184314	0.167615	3880.57	3239.33	82.0363	68.4803
NHS	411.46	-0.369851	0.156961	-2.35632	0.018457	0.167733	398.829	526.519	2.16255	2.85491
ZNF784	92.6551	-0.555571	0.23591	-2.35501	0.018522	0.168094	79.8396	129.632	1.98041	3.2155
TAB1	630.924	-0.299871	0.127325	-2.35517	0.0185141	0.168094	555.293	691.575	7.11881	8.86593
NREP	1162.37	-0.48038	0.204056	-2.35416	0.0185649	0.168353	1067.45	1575.84	15.5077	22.8934
FHL1	62.511	-0.502097	0.213302	-2.35393	0.018576	0.168353	51.8266	78.6395	0.620247	0.941136
NUDT14	109.163	0.499466	0.212305	2.35259	0.0186431	0.168846	133.623	88.3921	7.63064	5.04768
ZNF776	265.187	-0.466759	0.198459	-2.35191	0.0186773	0.16904	251.174	364.244	2.34991	3.40776
STEAP1	454.689	0.430958	0.183294	2.35119	0.0187134	0.169251	442.781	315.757	16.6964	11.9065
KANSL1	701.33	-0.336276	0.143052	-2.35073	0.0187366	0.169345	690.463	885.314	1.88037	2.41102
NRAV	353.361	0.35481	0.150958	2.3504	0.0187534	0.169381	388.857	298.3	10.1489	7.78545
MRPS33	509.947	0.343906	0.1464	2.34908	0.0188197	0.169864	576.906	446.249	34.9608	27.0429
HIST1H3E	23.5194	0.661266	0.281577	2.34844	0.0188523	0.169866	39.4441	18.7399	4.22705	2.00827
MAP7	44.0555	0.634863	0.270348	2.34832	0.0188583	0.169866	60.5544	31.2836	0.547294	0.282743
C9orf16	598.237	0.351255	0.149573	2.34838	0.0188552	0.169866	679.359	522.19	47.1745	36.2607
NBEAL2	559.531	-0.425167	0.181104	-2.34764	0.0188926	0.170059	449.806	627.272	2.52267	3.51796
CD81	5825.82	-0.272747	0.11626	-2.34601	0.0189757	0.170396	5481.5	6678.16	161.735	197.043
RAB6A	2747.93	0.235352	0.100299	2.3465	0.0189505	0.170396	2887.09	2439.56	40.152	33.9281
PMM2	950.882	0.340656	0.145214	2.34589	0.0189815	0.170396	926.94	719.503	19.756	15.3349
ERI2	359.474	0.341861	0.145718	2.34605	0.0189736	0.170396	364.38	282.69	4.28927	3.32766
VDAC2	4631.97	0.232067	0.098944	2.34544	0.0190046	0.170488	4687.4	3970.71	110.145	93.3042
CTSA	5780.21	0.275551	0.117579	2.34354	0.0191017	0.171128	6731.65	5512.81	145.795	119.397
F2R	2963.01	-0.344107	0.146818	-2.34376	0.0190903	0.171128	2816.42	3639.89	36.599	47.3
PXDC1	801.037	0.299041	0.127627	2.34308	0.0191253	0.171223	715.931	575.433	16.1559	12.9854
MOSPD1	514.306	0.43194	0.184407	2.34232	0.0191644	0.171458	604.992	431.077	12.271	8.74349
NDUFB6	952.388	0.244716	0.104501	2.34176	0.0191929	0.171597	1029.28	863.323	59.187	49.6441
USP49	139.381	-0.42881	0.183207	-2.34057	0.0192541	0.172028	124.851	174.459	0.617835	0.863326
DESI1	999.64	-0.321347	0.137315	-2.34022	0.0192726	0.172077	803.8	1019.57	10.4893	13.3051
CCDC51	355.23	0.360913	0.154274	2.33942	0.0193137	0.172327	425.595	324.147	12.2579	9.33607
HEG1	5009.18	-0.430689	0.184152	-2.33876	0.0193477	0.172467	4739.65	6641.44	25.6294	35.9132
PPP2CA	4872.15	0.28488	0.121822	2.33849	0.0193618	0.172467	4817.6	3915.91	90.2467	73.3555
CYFIP2	678.22	0.497333	0.212684	2.33836	0.0193683	0.172467	886.603	587.031	6.44017	4.26412
CCZ1	474.493	0.353787	0.151359	2.33741	0.0194179	0.172792	517.659	397.126	14.0513	10.7796
C11orf80	480.277	0.350196	0.14994	2.33558	0.019513	0.173405	460.86	354.706	9.80973	7.55016
INSIG1	2620.66	0.556682	0.238326	2.3358	0.0195015	0.173405	3194.25	1943.43	51.3305	31.2303
FYTTD1	1747.37	0.299688	0.128347	2.33498	0.0195446	0.17357	1893.56	1520.66	21.2636	17.0761
ZNF799	20.5471	-0.641178	0.27465	-2.33452	0.0195683	0.173664	15.7986	31.0957	0.30224	0.594886
DEAF1	987.812	-0.302977	0.129844	-2.33339	0.0196277	0.173725	872.755	1089.99	12.0196	15.0115
PTPRJ	2605.63	-0.386183	0.165497	-2.33347	0.0196234	0.173725	2586.38	3471.39	14.1448	18.9849
PPHLN1	1175.08	0.299932	0.128533	2.3335	0.0196219	0.173725	1244.59	999.423	13.4395	10.7921
TBC1D22B	397.107	0.334486	0.143312	2.33397	0.0195972	0.173725	435.465	339.325	6.00392	4.67841
EPOR	161.524	-0.45683	0.195805	-2.33308	0.019644	0.173754	139.26	200.438	2.56218	3.68776
TMCO1	1925.69	0.279108	0.119655	2.3326	0.0196692	0.173861	2011.77	1642.72	21.3284	17.4159
CD55	1762.84	0.31781	0.136346	2.33091	0.0197583	0.174297	1964.5	1554.27	28.0702	22.2086
UBE2S	5342.82	0.553747	0.237544	2.33113	0.0197463	0.174297	4831.84	2933.63	200.862	121.953
GRPEL1	728.141	0.301722	0.129477	2.33031	0.01979	0.174297	687.456	551.559	22.6305	18.1569
FCHO2	742.914	0.317738	0.136315	2.33091	0.0197583	0.174297	836.579	661.85	8.31549	6.57871
ARSI	344.258	-0.441191	0.189339	-2.33016	0.0197975	0.174297	353.161	499.101	5.52106	7.80258
STAG3L3	73.3353	-0.488164	0.209491	-2.33024	0.0197937	0.174297	56.1424	84.2485	1.28271	1.92487
BAG3	3731.29	0.312681	0.134247	2.32914	0.0198518	0.174659	3757.08	2984.69	72.4076	57.5219
SBDSP1	706.807	0.35119	0.150855	2.32799	0.0199124	0.17496	658.774	506.592	18.1605	13.9653
PRKDC	5786.09	-0.647956	0.278321	-2.32809	0.0199073	0.17496	4016.31	8267.51	14.7198	30.3004
FAM86C2P	21.5194	-0.650825	0.279641	-2.32736	0.0199461	0.175024	14.9461	30.9287	0.398057	0.823721
RASL10B	53.8118	-0.594836	0.255569	-2.32749	0.0199391	0.175024	45.4439	79.4548	0.704431	1.23164
OSBPL7	262.354	-0.506955	0.217889	-2.32666	0.0199832	0.175233	236.794	360.933	3.20673	4.88784
ASIC1	415.133	-0.394726	0.169719	-2.32576	0.0200314	0.175308	420.816	568.759	4.39924	5.94585
KRT18	4444.37	-0.376925	0.162061	-2.32582	0.0200283	0.175308	3980.42	5299.66	128.386	170.937
MICALL2	263.964	-0.458997	0.197316	-2.3262	0.0200079	0.175308	239.413	345.412	3.82493	5.51841
CEBPZOS	874.662	0.32164	0.13833	2.32517	0.020063	0.175468	979.359	772.067	14.5393	11.4619
ITPA	966.042	0.231873	0.0998213	2.32288	0.0201855	0.176423	1013.48	858.318	35.5369	30.0962
PTBP2	291.263	0.330641	0.142359	2.32259	0.0202012	0.176444	335.778	262.45	4.30911	3.36807
CEP95	340.528	0.353353	0.152159	2.32226	0.0202192	0.176485	377.428	289.349	6.9493	5.32756
PI4K2A	2269.76	0.265382	0.114313	2.32154	0.0202577	0.176512	2557.08	2110.79	30.237	24.9597
ARL1	2019.51	0.267575	0.115253	2.32162	0.0202532	0.176512	2139.81	1763.05	32.6884	26.9328
TP53I3	788.272	0.406665	0.175214	2.32096	0.0202889	0.176512	1009.52	736.898	24.5732	17.9372
ATP5E	744.083	0.262076	0.112906	2.32119	0.0202766	0.176512	846.463	700.345	95.4643	78.985
ZSCAN25	194.388	-0.418638	0.180354	-2.3212	0.0202758	0.176512	178.04	246.361	2.02686	2.80466
ZNF526	176.133	-0.507757	0.218844	-2.32018	0.0203312	0.176618	144.481	221.28	1.80914	2.77078
NPTXR	339.957	-0.501217	0.216065	-2.31975	0.0203543	0.176618	319.915	484.971	2.72385	4.12918
AP1AR	475.985	0.324263	0.139773	2.31992	0.0203452	0.176618	520.689	409.61	8.86201	6.97147
NSUN2	2012.07	0.375757	0.161952	2.32017	0.0203317	0.176618	1845.71	1387.21	27.1003	20.3682
AKR1C1	56.4689	0.663922	0.286282	2.31912	0.0203886	0.176799	98.5531	39.1705	3.53837	1.40635
ADGRG1	1247.83	-0.389786	0.168096	-2.31883	0.0204044	0.176804	1312.29	1766.35	12.9479	17.4278
GREB1L	14.8964	-0.663975	0.286367	-2.31862	0.0204158	0.176804	8.78887	23.1082	0.0719004	0.189045
ZNF146	1979.5	0.29967	0.129295	2.31772	0.0204645	0.177109	1968.4	1580.77	25.274	20.2969
SIX4	874.953	-0.373261	0.161091	-2.31708	0.0204992	0.177294	849.565	1126.79	6.70317	8.8905
GLRX5	978.183	0.321919	0.139063	2.31492	0.0206173	0.178083	997.64	786.372	42.1807	33.2482
HMGB2	6531.01	0.408301	0.176369	2.31503	0.0206112	0.178083	6935.45	5052.37	207.73	151.328
DOK3	62.8202	0.58138	0.251211	2.31431	0.0206507	0.178255	73.2681	42.2692	1.02531	0.591512
ZNF791	171.527	-0.383871	0.165921	-2.31357	0.0206912	0.178463	161.358	215.992	3.20198	4.28612
SDCBP	5739.82	0.329645	0.142508	2.31317	0.0207135	0.178463	6832.32	5349.86	156.101	122.231
SNX30	997.473	-0.374278	0.161805	-2.31314	0.0207152	0.178463	959.632	1274.68	6.24663	8.29742
CSRNP3	106.252	-0.574213	0.248272	-2.31284	0.0207315	0.178487	101.781	170.276	0.41854	0.700204
RWDD1	923.877	0.319347	0.13812	2.3121	0.0207724	0.178724	999.626	789.431	29.2852	23.1273
TCTA	816.902	0.33782	0.146157	2.31135	0.0208138	0.178964	971.631	755.304	22.4061	17.4176
SGMS1	316.015	0.355659	0.15407	2.30843	0.0209753	0.179192	337.718	258.486	4.45526	3.41001
MRPL49	1564.02	0.217431	0.0941901	2.30843	0.0209754	0.179192	1653.54	1416.26	37.8666	32.4328
LRP1	19647.7	-0.470756	0.203909	-2.30866	0.0209624	0.179192	17239.7	25275.2	57.3312	84.0535
METTL4	441.339	0.369118	0.159849	2.30917	0.0209344	0.179192	452.389	342.165	6.07486	4.59472
ZNF431	94.997	-0.455932	0.197471	-2.30886	0.0209516	0.179192	79.8759	115.264	1.02826	1.48382
SEMA3F	1356.67	-0.461491	0.199923	-2.30835	0.0209799	0.179192	1294.64	1876.48	18.2304	26.4237
MRPS10	1279.16	0.294135	0.127363	2.30942	0.0209206	0.179192	1360.02	1096.9	31.4651	25.3776
ING3	351.791	0.371779	0.161056	2.30838	0.0209779	0.179192	372.487	281.181	6.09654	4.60213
MEST	2443.53	-0.538083	0.233102	-2.30836	0.0209794	0.179192	2152.93	3439.64	35.4364	56.6151
CEBPD	37.3609	0.638215	0.276501	2.30818	0.0209891	0.179192	53.8743	26.8008	2.13217	1.06069
MRPL15	1630.03	0.287504	0.12451	2.30909	0.0209388	0.179192	1672.14	1355.49	47.3348	38.3711
MLLT11	852.059	-0.458464	0.198666	-2.30771	0.0210154	0.1793	738.705	1067.7	16.9479	24.4961
RBM34	715.85	0.355726	0.1542	2.30692	0.0210594	0.179365	783.474	599.569	18.7302	14.3336
RRP12	1057.47	-0.269105	0.116655	-2.30684	0.0210635	0.179365	900.616	1094.87	10.0745	12.2475
ZNF567	126.863	0.419439	0.181786	2.30732	0.0210368	0.179365	135.532	97.4918	2.35366	1.69304
GPHN	197.157	-0.408118	0.176955	-2.30634	0.0210917	0.17949	177.486	243.003	2.04263	2.79665
PPP2R5C	2815.92	0.268583	0.116472	2.30599	0.0211112	0.17954	2955.67	2433.55	29.0639	23.9297
IL10RB-AS1	11.5239	0.660037	0.286326	2.30519	0.0211558	0.179804	19.126	7.5838	2.01905	0.800592
RBM33	917.571	-0.269198	0.116833	-2.30413	0.0212154	0.180195	848.158	1030.13	4.06709	4.93969
PDDC1	1283.1	-0.309619	0.134392	-2.30385	0.0212311	0.180213	1176.2	1477.17	13.3504	16.7665
SRC	960.8	-0.377295	0.163839	-2.30285	0.0212874	0.180575	848.519	1130.65	9.90583	13.1995
DNTTIP1	735.469	0.323066	0.140323	2.3023	0.021318	0.180693	776.795	611.113	29.8136	23.4547
EAF1	596.043	0.271325	0.117859	2.30212	0.0213286	0.180693	629.686	517.047	6.94654	5.70393
LYPLAL1	375.363	0.384524	0.167087	2.30133	0.0213727	0.180835	450.391	335.489	10.5483	7.85726
ANKRD13D	699.934	0.313773	0.13634	2.30141	0.0213687	0.180835	735.575	583.516	15.9942	12.6878
WDR53	187.651	0.394522	0.171499	2.30044	0.0214235	0.181034	197.249	145.757	6.21637	4.59358
CPE	1463.23	0.309649	0.13459	2.30067	0.02141	0.181034	1734.15	1380.4	35.362	28.1484
CDR2	951.684	0.301267	0.131002	2.29972	0.021464	0.181261	929.896	745.952	17.0391	13.6686
TACC2	858.737	0.359037	0.156205	2.2985	0.0215334	0.181269	903.248	688.967	4.16506	3.17697
TOLLIP	1301.02	0.309768	0.134761	2.29864	0.0215253	0.181269	1416.89	1128.04	19.167	15.2595
C11orf63	169.746	0.371908	0.161799	2.29859	0.0215285	0.181269	187.188	141.045	2.3985	1.80725
VWA9	967.236	0.247908	0.107821	2.29925	0.0214908	0.181269	1038.67	869.053	17.8994	14.9764
CORO2B	1431.27	0.389625	0.169461	2.29919	0.021494	0.181269	1317.54	976.548	16.3203	12.0964
WDFY2	371.669	-0.414788	0.180489	-2.29813	0.0215542	0.181279	300.36	415.046	3.90417	5.39489
GBE1	3578.14	0.277062	0.120567	2.298	0.021562	0.181279	3727.96	3047.41	59.559	48.6863
PTOV1-AS2	158.695	-0.573467	0.249683	-2.29678	0.0216316	0.181749	120.904	205.943	5.43689	9.26099
LOC653513	72.1627	0.626156	0.272935	2.29416	0.0217816	0.182411	104.017	53.8268	2.95974	1.53161
DPM3	164.762	-0.421922	0.183906	-2.29423	0.0217774	0.182411	158.619	219.826	14.3571	19.8971
HPS6	582.743	-0.461864	0.201275	-2.29469	0.0217511	0.182411	509.689	740.073	9.44421	13.7131
TPCN2	194.054	-0.455216	0.198423	-2.29417	0.0217809	0.182411	163.925	236.269	1.61481	2.32745
CCNA1	40.0922	0.572165	0.249423	2.29396	0.0217929	0.182411	48.981	28.7451	1.05346	0.618237
ZFAND2A	298.022	0.345432	0.150518	2.29496	0.0217356	0.182411	289.088	223.142	15.8856	12.2618
SERF2	3148.42	0.301555	0.13151	2.29302	0.0218466	0.182744	3551.51	2845.98	44.7992	35.8996
ANKEF1	196.532	-0.361935	0.15789	-2.29233	0.0218869	0.182966	187.68	246.313	2.36924	3.1094
B4GALNT1	558.74	-0.354663	0.154864	-2.29016	0.0220123	0.183667	427.252	559.01	5.44912	7.12954
KANK2	4979.3	-0.387409	0.169128	-2.29063	0.0219848	0.183667	4840.74	6512.87	45.808	61.6315
NR4A3	43.141	0.655643	0.286273	2.29028	0.0220054	0.183667	72.966	28.9588	0.572427	0.227185
SNHG21	52.0754	-0.556147	0.24291	-2.28952	0.0220492	0.183859	43.7702	71.7344	2.05801	3.37285
TGDS	184.925	0.419278	0.183182	2.28886	0.0220873	0.183945	199.127	143.175	4.93933	3.55145
MOCS3	234.551	-0.432088	0.188771	-2.28895	0.022082	0.183945	211.667	297.676	3.43711	4.83374
SFSWAP	1022.28	0.352072	0.153874	2.28805	0.0221346	0.184223	1015.19	779.081	14.7615	11.3283
AP3B1	1758.17	-0.381845	0.166929	-2.28747	0.0221686	0.184391	1604.45	2147.93	19.6189	26.2646
USMG5	2123.95	0.310739	0.135926	2.28608	0.0222494	0.184947	2330.86	1853.54	129.23	102.765
ZNF891	20.6795	-0.628317	0.27492	-2.28545	0.0222864	0.185138	13.7255	27.1264	0.295074	0.583171
RNF10	3395.33	0.259256	0.113572	2.28275	0.0224451	0.18634	3458.17	2867.62	44.5062	36.9059
SNX22	11.3431	-0.653449	0.286452	-2.28118	0.0225375	0.18699	5.65766	14.7624	0.0765129	0.199643
RNF220	921.816	-0.345707	0.151627	-2.27999	0.0226083	0.187459	829.868	1074.98	13.6502	17.6819
LRIG1	1926.09	-0.342498	0.15026	-2.27938	0.0226446	0.187643	1754.76	2267.41	18.2442	23.5743
TAF6L	313.878	-0.384861	0.168885	-2.27883	0.0226769	0.187793	281.315	377.964	6.58537	8.84785
C1RL-AS1	127.95	-0.425882	0.187018	-2.27723	0.0227726	0.188468	109.103	152.199	1.02461	1.42933
ZPR1	721.831	0.311379	0.136777	2.27654	0.0228136	0.188689	698.019	555.04	19.4372	15.4557
NDUFS2	1703.04	-0.24838	0.109188	-2.27479	0.0229186	0.189126	1616.8	1933.17	35.1862	42.0712
TTC9C	234.404	-0.434057	0.190819	-2.27471	0.0229235	0.189126	220.302	310.164	9.57618	13.4823
KIAA0513	278.442	-0.32561	0.143118	-2.27511	0.0228992	0.189126	268.204	341.111	1.53994	1.95855
IFNE	33.9706	-0.557548	0.245088	-2.27489	0.0229127	0.189126	28.2213	46.5698	0.94793	1.56424
YLPM1	1955.19	-0.417136	0.183451	-2.27382	0.0229768	0.189448	1647.29	2285.05	10.0231	13.9036
LAMA5	513.96	-0.475112	0.209032	-2.27291	0.0230317	0.189782	448.735	662.68	1.94358	2.87023
HLF	24.8176	-0.626873	0.275922	-2.27192	0.0230914	0.190109	22.2838	42.5045	0.19705	0.375857
OTUD6B-AS1	623.67	0.366019	0.161116	2.27178	0.0231001	0.190109	669.369	507.03	5.51244	4.17553
SMAGP	838.009	0.297059	0.130849	2.27024	0.0231929	0.190755	787.436	633.466	31.466	25.3133
DERL2	878.124	0.305708	0.134706	2.26944	0.0232418	0.191038	934.659	746.288	10.4506	8.34443
ADGRB2	892.425	-0.388903	0.171476	-2.26798	0.0233303	0.191177	829.512	1118.26	7.54956	10.1775
ANP32E	4052.61	0.379391	0.167303	2.2677	0.0233478	0.191177	4112.46	3075.74	57.3388	42.8841
CSTF2T	643.057	-0.426481	0.188051	-2.2679	0.0233351	0.191177	552.52	774.121	6.65585	9.32533
BUB3	5806.19	-0.471047	0.207782	-2.26703	0.0233885	0.191177	4422.35	6514.37	79.2159	116.69
EI24	2698.15	0.251057	0.110722	2.26744	0.0233631	0.191177	2843.89	2373.01	57.3067	47.8181
SRRM2	9748.74	-0.381843	0.168417	-2.26725	0.023375	0.191177	7824.01	10485.8	41.4167	55.5068
LPCAT1	2627.1	0.257711	0.113602	2.26853	0.0232968	0.191177	2784.56	2311.68	18.038	14.9748
GNAI1	760.073	0.319237	0.140702	2.26888	0.0232756	0.191177	812.213	641.06	11.0597	8.72915
DERL1	1893.25	0.25459	0.112291	2.26723	0.0233761	0.191177	1884.89	1568.81	27.9407	23.2552
KIAA0753	587.84	0.260452	0.11495	2.26579	0.0234643	0.191675	612.129	507.01	6.4689	5.35802
YIPF4	650.115	0.336755	0.148671	2.2651	0.0235067	0.191675	727.842	565.883	18.3389	14.2581
THSD7A	85.2292	-0.52835	0.233258	-2.26509	0.0235073	0.191675	81.9167	129.047	0.383159	0.603606
PSMB7	2617.5	0.211285	0.0932773	2.26513	0.0235046	0.191675	2703.95	2325.59	131.896	113.44
UNC13D	39.437	0.593823	0.262219	2.26461	0.0235366	0.191795	54.7516	30.4627	0.617208	0.343403
GRIK5	685.706	-0.361254	0.159569	-2.26394	0.0235777	0.192013	614.32	807.613	7.07168	9.29675
GLUD1P3	57.5276	-0.541691	0.2395	-2.26176	0.0237124	0.19232	47.3157	76.2945	0.575725	0.928331
NAA20	1301.81	0.257476	0.113812	2.26229	0.0236798	0.19232	1317.71	1094.23	48.9427	40.6422
TTC28-AS1	157.79	-0.431148	0.190632	-2.26168	0.0237171	0.19232	138.093	193.968	1.16099	1.63075
ZBTB12	257.737	-0.459326	0.202977	-2.26294	0.0236391	0.19232	231.75	336.485	1.2302	1.78617
LINC00998	966.59	0.368596	0.162964	2.26182	0.0237085	0.19232	1121.41	847.048	49.2649	37.2119
NEIL2	354.109	0.334851	0.148022	2.26218	0.0236863	0.19232	377.634	293.937	6.79638	5.29007
HOOK3	1064.68	-0.351857	0.155553	-2.26198	0.0236988	0.19232	980.522	1278.03	3.36192	4.38198
TBCA	2119.99	0.231887	0.102543	2.26136	0.0237367	0.192362	2187.41	1852.25	44.2582	37.4769
DNAJC19	396.046	0.272319	0.120478	2.26032	0.0238012	0.192767	431.022	353.419	13.0123	10.6695
MAFF	544.573	0.491739	0.217648	2.25933	0.0238627	0.193012	545.054	359.609	10.6664	7.03733
TRAM2	7154.62	-0.352309	0.155926	-2.25946	0.0238547	0.193012	6791.59	8855.86	47.6485	62.1309
DAB2IP	773.612	-0.342594	0.151649	-2.25913	0.0238752	0.193012	687.832	889.522	5.5993	7.24115
SDC3	2175.73	-0.410502	0.18173	-2.25886	0.0238922	0.193031	2137.14	2942.86	20.6622	28.452
KIAA2018	247.429	-0.455277	0.201591	-2.25842	0.0239195	0.193135	235.349	339.456	0.850095	1.22614
SEC23B	1067.87	-0.392765	0.173936	-2.25809	0.0239398	0.193181	932.959	1263.38	12.3275	16.6936
TWF1	3490.93	0.332336	0.147234	2.2572	0.0239956	0.193513	3746.54	2923.68	53.6728	41.8845
PRDM4	1243.45	0.219423	0.0972335	2.25666	0.0240294	0.19355	1267.41	1083.78	14.9869	12.8154
TUBD1	99.2047	0.463945	0.205588	2.25667	0.0240287	0.19355	117.617	80.5857	2.23887	1.53396
SLC33A1	808.947	0.294898	0.130704	2.25623	0.0240564	0.19365	843.817	680.083	10.9624	8.83528
LPAR1	2421.35	0.268537	0.119088	2.25494	0.0241372	0.194182	2596.21	2136.79	40.5744	33.3944
GALM	164.28	-0.408957	0.181452	-2.25381	0.0242081	0.194281	158.835	218.363	3.16713	4.3541
SLC9A8	598.84	0.281433	0.124858	2.25403	0.0241945	0.194281	663.42	540.438	5.19637	4.23309
LDOC1L	2151.45	-0.324173	0.143807	-2.25422	0.0241822	0.194281	2127.63	2706.76	19.7859	25.1715
RP9P	134.529	0.423092	0.18769	2.2542	0.0241833	0.194281	149.692	107.158	5.71419	4.09056
TEC	32.9087	-0.583953	0.259173	-2.25314	0.0242502	0.1945	28.2626	49.0085	0.386546	0.670287
PRKX	377.334	0.352656	0.156556	2.25259	0.024285	0.194662	427.282	327.214	3.47714	2.66281
ZNF500	223.798	-0.402456	0.178758	-2.2514	0.0243604	0.195052	208.118	283.801	3.1177	4.25148
GOLGA7	844.818	0.305481	0.135688	2.25136	0.0243631	0.195052	917.844	732.756	21.7638	17.3751
GPC2	13.8642	-0.64372	0.286152	-2.24958	0.0244757	0.195836	8.8372	20.4893	0.168867	0.391522
SEC62	3160.87	0.271158	0.120574	2.24888	0.0245198	0.19607	3327.75	2732.68	25.1886	20.6843
SFXN2	330.236	-0.451246	0.200814	-2.24708	0.0246348	0.196515	236.71	342.157	4.5744	6.61216
GANAB	16824.6	-0.264631	0.117745	-2.24749	0.0246086	0.196515	15661.4	18974.2	193.031	233.862
TIGD1	70.5864	-0.517804	0.230431	-2.24711	0.0246327	0.196515	59.865	93.2044	1.13085	1.76063
XPO7	2419.67	-0.222717	0.099109	-2.24719	0.0246278	0.196515	2233.24	2619.45	22.7367	26.6688
LAPTM4A	6232.52	0.254485	0.113308	2.24596	0.0247063	0.196848	6827.86	5680.91	191.53	159.357
RPRD1B	519.848	-0.271058	0.120676	-2.24616	0.0246938	0.196848	492.03	599.537	6.29149	7.66616
FOXD1	2049.01	-0.407615	0.181575	-2.24488	0.0247759	0.197284	1667.36	2292.79	36.3345	49.9636
RBM38	345.051	0.30441	0.135621	2.24457	0.0247958	0.197324	361.003	288.19	7.19543	5.74413
MINPP1	1204.37	-0.2912	0.129792	-2.24358	0.0248591	0.197591	1176.42	1455.95	17.634	21.824
ZBED8	105.265	-0.442935	0.197409	-2.24374	0.0248491	0.197591	100.065	142.383	1.69377	2.41007
WDR45B	2321.43	0.234794	0.104677	2.24303	0.0248947	0.197755	2270.82	1918.85	43.4594	36.7233
FAR1	2143.71	0.313968	0.140109	2.24088	0.0250337	0.197926	2110.99	1673.38	19.8135	15.7062
DUSP6	963.906	-0.558161	0.248934	-2.2422	0.0249484	0.197926	885.211	1473.1	12.9094	21.4828
ZNF134	268.738	-0.318434	0.142036	-2.24192	0.0249665	0.197926	244.998	309.797	5.39589	6.82305
SNRNP200	5358.03	-0.345826	0.154308	-2.24114	0.0250171	0.197926	4617.77	5990.76	31.6703	41.0868
CWC22	617.276	0.311093	0.138835	2.24074	0.0250427	0.197926	646.463	513.876	9.76112	7.75915
XRN1	915.115	-0.322698	0.144022	-2.24062	0.0250507	0.197926	868.16	1103.79	3.9766	5.05589
PPID	848.156	0.300231	0.133886	2.24244	0.0249328	0.197926	901.418	722.939	24.3346	19.5164
HMMR	1947.68	0.492231	0.219593	2.24156	0.0249896	0.197926	1996.14	1315.06	31.4544	20.7223
LSM5	1121.95	0.341036	0.152167	2.24119	0.0250137	0.197926	1161.37	899.407	17.611	13.6386
INTS12	365.208	0.30452	0.135986	2.23935	0.0251329	0.198457	386.68	308.519	10.9274	8.71856
STEAP3	2539.62	-0.280908	0.125457	-2.23907	0.0251514	0.198485	2401.72	2947.99	27.3231	33.5378
DYNLL1	6301.72	0.323346	0.144463	2.23826	0.0252043	0.198547	6639.07	5219.81	334.049	262.637
COL5A2	2279.25	-0.427204	0.19086	-2.23831	0.0252009	0.198547	2122.48	2977.04	15.1638	21.2691
CHMP2B	1421.55	0.349439	0.156099	2.23858	0.0251835	0.198547	1589.97	1221.73	29.9544	23.017
ZNF37BP	276.092	-0.339157	0.151602	-2.23715	0.0252767	0.198689	244.622	315.419	1.39019	1.79253
SHPK	315.546	-0.383741	0.171538	-2.23706	0.0252822	0.198689	256.545	344.995	3.30945	4.45046
PTPN13	995.199	-0.32959	0.147292	-2.23766	0.0252431	0.198689	972.806	1243.17	5.6155	7.17618
ZNF703	937	-0.384058	0.171671	-2.23717	0.0252752	0.198689	858.195	1153.32	12.6873	17.0503
DIRC3	61.2149	0.580491	0.259578	2.23629	0.0253331	0.198971	53.6634	29.7642	0.680211	0.377276
NDEL1	941.989	0.293563	0.131313	2.23559	0.0253787	0.199034	884.462	713.026	17.9984	14.5098
MN1	740.482	-0.420449	0.188081	-2.23547	0.0253863	0.199034	706.642	984.036	4.63026	6.44787
RPL24	9526.48	0.275442	0.123201	2.23571	0.0253706	0.199034	10247.5	8384.03	902.774	738.608
C15orf39	574.942	-0.434475	0.194392	-2.23505	0.0254143	0.199136	538.25	760.444	6.01966	8.50462
SMARCAL1	799.411	0.247242	0.110659	2.23426	0.0254661	0.199287	851.908	712.499	12.712	10.6318
NDUFC1	790.813	0.250062	0.111931	2.23407	0.0254787	0.199287	868.074	724.336	29.5794	24.6815
TSPAN13	585.957	0.457623	0.204805	2.23443	0.0254548	0.199287	685.387	471.671	17.8411	12.278
CKAP2L	3162.07	0.479914	0.214872	2.23349	0.0255167	0.199467	3133.91	2095.94	32.3996	21.6687
DDX27	887.13	-0.326651	0.146267	-2.23325	0.0255324	0.199472	781.586	997.548	14.3587	18.3262
ST6GALNAC3	50.7323	-0.507984	0.227525	-2.23265	0.0255721	0.199546	41.4388	64.4363	0.566599	0.881048
EDRF1	542.039	-0.290728	0.130213	-2.2327	0.0255685	0.199546	475.968	589.552	4.88605	6.05204
TMEM51	341.563	0.367341	0.164616	2.2315	0.0256483	0.199811	334.011	252.425	7.38922	5.58432
STXBP3	868.473	0.291066	0.130424	2.23169	0.0256352	0.199811	969.572	783.333	19.1786	15.4947
SSH2	501.02	-0.420754	0.188575	-2.23122	0.0256663	0.199811	444.166	619.397	2.19601	3.06238
BBC3	147.747	0.617764	0.276864	2.23129	0.0256618	0.199811	237.221	122.367	5.60616	2.89187
TMEM126B	778.255	0.32973	0.147818	2.23065	0.0257042	0.199988	872.028	681.924	32.1958	25.1771
NSMCE2	494.988	0.300577	0.134762	2.23042	0.0257194	0.199989	529.717	424.731	21.6391	17.3504
NCF2	43.9986	0.615369	0.275986	2.22972	0.0257663	0.20012	46.6259	23.2413	0.925611	0.461384
CBWD2	435.427	0.290148	0.13012	2.22984	0.0257579	0.20012	457.352	369.725	12.3939	10.0193
ZNF629	861.528	-0.307214	0.137845	-2.22869	0.0258344	0.200531	816.245	1023.7	6.63918	8.32657
MED12	1039.75	-0.361665	0.162302	-2.22835	0.0258574	0.200592	945.405	1244.44	6.71653	8.84096
GLRX3	2625.98	0.306976	0.137821	2.22736	0.0259231	0.200678	2797.47	2229.82	86.5651	68.9998
B2M	19937	0.327689	0.147133	2.22716	0.0259367	0.200678	23058.2	18057.7	578.331	452.91
CRHR1-IT1	59.8698	-0.486431	0.21842	-2.22705	0.0259442	0.200678	53.5437	80.1856	0.31627	0.473638
SRP68	1992.53	0.236229	0.106043	2.22766	0.0259032	0.200678	2037.78	1720.05	32.9927	27.8485
ARMCX1	690.895	0.34531	0.154991	2.22794	0.0258847	0.200678	803.323	619.315	18.6465	14.3753
TCFL5	308.54	-0.275613	0.123832	-2.22571	0.0260339	0.201254	272.002	332.467	3.40764	4.16513
KCTD2	815.11	0.292604	0.131536	2.22452	0.0261132	0.20136	892.832	720.054	10.8611	8.75927
SPTBN1	10450.4	-0.359038	0.161405	-2.22445	0.0261182	0.20136	8969.25	11779.9	34.0964	44.7811
GALNT3	13.933	0.636709	0.286195	2.22473	0.026099	0.20136	18.5575	7.79343	0.281234	0.118107
PKIB	174.884	0.450742	0.202566	2.22516	0.0260705	0.20136	196.32	135.795	4.03651	2.79206
TCEB1	1751.2	0.269056	0.120958	2.22437	0.0261236	0.20136	1786.19	1468.99	37.955	31.2147
THSD1	84.9312	0.545272	0.245321	2.22269	0.026237	0.202116	93.9539	56.594	1.38981	0.837167
ZMIZ1	10348.6	-0.349983	0.157506	-2.22202	0.0262819	0.202149	10552.2	13739.7	69.1521	90.041
SPAG5	3553.17	0.487139	0.219255	2.2218	0.0262971	0.202149	3436.12	2272.85	44.6755	29.5509
ABHD12	1875.97	0.225392	0.10148	2.22104	0.0263481	0.202149	1984.55	1688.93	40.7532	34.6826
NEK11	178.26	0.366189	0.164851	2.22134	0.0263282	0.202149	214.795	162.474	3.19934	2.42003
BST1	10.0766	0.636267	0.28638	2.22175	0.0263001	0.202149	18.2665	7.7916	0.611069	0.260653
JADE1	841.871	-0.299026	0.13463	-2.2211	0.0263444	0.202149	734.188	915.414	4.12272	5.14037
CA5BP1	191.544	0.406438	0.182964	2.22141	0.0263233	0.202149	214.546	156.004	10.6864	7.77044
TRMT1L	480.301	-0.346457	0.156006	-2.22079	0.0263651	0.202163	461.343	598.255	5.05228	6.55162
LYST	380.394	-0.414276	0.186609	-2.22003	0.026417	0.202366	377.586	522.271	1.11722	1.54532
TMEM230	2184.57	0.296911	0.133747	2.21995	0.0264221	0.202366	2433.96	1956.36	67.1346	53.9612
MOV10	1402.11	-0.284587	0.128278	-2.21851	0.0265199	0.202997	1312.21	1616.17	14.4437	17.7896
MAP3K14	315.211	-0.443741	0.200067	-2.21796	0.0265573	0.20305	287.325	410.344	3.17111	4.52883
TMEM241	116.76	-0.424477	0.191381	-2.21796	0.0265574	0.20305	99.9629	140.127	1.65415	2.31878
SRGAP2	1743.68	0.318345	0.143556	2.21756	0.0265848	0.203142	1768.63	1396.23	10.1209	7.98983
CDH6	1538.99	-0.420993	0.189901	-2.21691	0.0266292	0.203364	1356.38	1892.81	7.83516	10.9339
AREG	49.8651	0.613947	0.277071	2.21585	0.0267019	0.203802	54.2079	26.6604	2.10334	1.03446
AVIL	39.2835	0.535617	0.241843	2.21473	0.0267785	0.20424	54.3421	33.6738	0.898333	0.556664
LINC01184	288.029	0.340992	0.153977	2.21456	0.0267902	0.20424	306.618	237.329	5.13907	3.97775
MAPKAP1	3863.83	0.269646	0.121813	2.2136	0.026856	0.204624	3685.04	3028.83	49.4172	40.6172
LRFN4	932.291	0.376685	0.170249	2.21255	0.0269283	0.205058	966.508	723.544	18.9289	14.1705
RAB21	1040.39	0.244515	0.110568	2.21145	0.027005	0.205288	1058.74	887.611	19.9538	16.7286
NR1D2	1620.34	-0.239148	0.108126	-2.21176	0.0269833	0.205288	1575.51	1871.54	14.1878	16.8536
SEC61A1	14144.6	0.180249	0.0815068	2.21146	0.0270041	0.205288	13762.7	12114.8	187.403	164.964
KCMF1	1330.72	0.216414	0.0978782	2.21105	0.0270322	0.205376	1324.12	1134.47	8.67972	7.43655
CCNL2	1516.66	-0.448943	0.203151	-2.2099	0.0271124	0.205868	1259.06	1813.28	17.1679	24.7251
SLC15A4	568.42	-0.357041	0.161601	-2.2094	0.0271467	0.20601	530.238	695.036	9.41282	12.3383
DUSP18	140.518	-0.471742	0.213629	-2.20823	0.027228	0.206509	127.115	187.269	1.81579	2.67506
TRAF6	302.888	-0.317864	0.143985	-2.20762	0.027271	0.206716	293.649	371.596	1.81258	2.29372
LPP	1475.9	-0.456781	0.206932	-2.2074	0.0272864	0.206716	1274.34	1852.26	3.41359	4.96166
KLHL42	1120.14	-0.348797	0.158045	-2.20695	0.0273177	0.206834	961.544	1252.21	7.35918	9.58379
CLIC4	17156.6	0.314498	0.142534	2.20647	0.0273508	0.206889	18006.2	14256.6	201.059	159.191
XPR1	1313.78	0.236778	0.107325	2.20618	0.0273714	0.206889	1383.14	1166.63	8.06027	6.79853
RBM47	169.744	0.43013	0.194986	2.20595	0.0273874	0.206889	224.333	159.193	2.1164	1.50186
SEC61G	1356.31	0.426542	0.193357	2.20598	0.0273856	0.206889	1539	1094.79	163.513	116.317
REL	124.332	-0.441989	0.20045	-2.20499	0.027455	0.207281	111.877	159.489	0.707689	1.00886
CPD	3141.38	-0.237049	0.107532	-2.20445	0.0274924	0.207403	3095.3	3670.87	16.6431	19.7379
TRAF1	117.807	0.579582	0.262931	2.20431	0.0275024	0.207403	135.762	75.7142	1.46921	0.819377
CMTM6	5590.56	0.251959	0.114358	2.20324	0.0275776	0.207616	6264.52	5220.85	92.1449	76.7935
SAP30	656.716	0.316606	0.143674	2.20364	0.0275499	0.207616	703.286	555.728	31.3977	24.8101
EPB41L4B	45.953	0.57622	0.261519	2.20336	0.0275697	0.207616	46.3866	25.9619	0.291302	0.163037
CCDC28B	98.1868	-0.534369	0.242571	-2.20293	0.0275994	0.207661	88.4228	141.835	2.62935	4.2176
KIAA1279	2177.13	0.304807	0.138383	2.20263	0.0276207	0.207704	2186.93	1746.07	42.5447	33.9681
SLC4A1AP	789.539	0.26553	0.120574	2.20221	0.0276506	0.207811	824.819	680.179	13.7499	11.3387
ODF2	1827.22	0.370763	0.168381	2.20193	0.0276703	0.207841	1749.91	1316.87	17.8233	13.4126
TMEM180	167.919	-0.414467	0.188286	-2.20127	0.0277172	0.207957	147.433	204.62	2.57568	3.57474
RASSF1	604.192	0.397899	0.180757	2.20129	0.0277153	0.207957	589.764	432.307	12.4571	9.13129
RAI1	1067.47	-0.352488	0.16026	-2.19948	0.027844	0.208791	942.401	1231.19	6.09122	7.9578
CD177	30.685	0.552666	0.251307	2.19917	0.0278661	0.208838	41.1664	24.6063	0.917269	0.548278
SLC26A10	179.094	-0.452061	0.205593	-2.19882	0.027891	0.208906	135.197	196.234	2.77861	4.03306
ANXA4	1317.79	0.30833	0.140245	2.19851	0.0279129	0.208952	1591.92	1266.58	36.7959	29.2759
TANC2	256.155	-0.468773	0.213261	-2.19812	0.0279406	0.209042	216.679	319.738	0.913247	1.34761
MITF	650.782	-0.332803	0.151435	-2.19765	0.0279737	0.209097	601.789	771.988	4.88841	6.27096
EMB	1865.62	-0.308334	0.140307	-2.19757	0.0279795	0.209097	1743.68	2190.36	20.0349	25.1673
PAFAH2	163.528	0.413934	0.1884	2.1971	0.0280132	0.20923	184.816	133.238	2.55525	1.84214
NFKB2	1466.07	0.369668	0.168328	2.19612	0.0280835	0.209284	1501	1130.41	19.1288	14.4059
NLGN2	1756.16	-0.337527	0.153684	-2.19625	0.0280741	0.209284	1605.8	2069.17	17.1123	22.0503
ADRM1	2874.55	0.303945	0.138378	2.19649	0.0280571	0.209284	2718.22	2171.37	90.9327	72.6389
PDCD10	1066.65	0.312211	0.142131	2.19665	0.0280457	0.209284	1118.94	887.744	35.3088	28.0132
KIAA1467	220.89	-0.422549	0.192532	-2.1947	0.0281853	0.209688	199.767	279.332	2.09946	2.93566
ATOH8	913.662	-0.402148	0.183224	-2.19484	0.0281752	0.209688	993.313	1358.42	8.3881	11.4713
NAPRT	104.076	0.589956	0.268795	2.19482	0.0281767	0.209688	96.5991	51.4511	1.40419	0.747907
DENND5A	2578.96	0.227263	0.103573	2.19422	0.0282194	0.209824	2429.61	2064.2	24.2229	20.5799
PLEKHG4	227.275	-0.530199	0.241733	-2.19332	0.028284	0.210187	185.269	298.093	1.80247	2.90013
SLC35D2	484.522	0.263627	0.120236	2.19259	0.0283372	0.210464	546.96	451.419	8.76669	7.23534
RAVER2	434.359	-0.362749	0.165468	-2.19226	0.0283611	0.210523	393.751	519.936	4.47026	5.90285
PTCHD4	94.1106	0.616802	0.281384	2.19203	0.0283772	0.210525	155.945	78.103	1.49139	0.746943
HAUS2	544.906	-0.452875	0.206663	-2.19137	0.0284249	0.210666	434.258	629.644	5.4514	7.90416
UFD1L	1535.02	0.283216	0.129244	2.19133	0.0284279	0.210666	1600.4	1300.77	44.4399	36.1198
RBMS3	227.826	-0.353574	0.161389	-2.19082	0.0284651	0.210706	183.013	239.407	1.08321	1.41699
ELF4	853.845	-0.288306	0.131597	-2.19083	0.0284641	0.210706	787.882	973.66	9.13119	11.2843
DAP3	1460.26	0.269267	0.123039	2.18847	0.028635	0.211484	1514.22	1244.57	33.8159	27.7939
DDIAS	434.652	0.485631	0.221925	2.18827	0.02865	0.211484	392.229	258.959	5.45031	3.59843
AHNAK2	5137.77	-0.418395	0.191194	-2.18832	0.0286461	0.211484	4794.39	6680.4	12.9591	18.057
EIF1	9918.14	0.246602	0.112675	2.18862	0.0286246	0.211484	10106	8456.88	377.339	315.765
WDR6	4460.38	-0.378212	0.172825	-2.18841	0.02864	0.211484	3886.47	5202.7	45.1799	60.4809
RAB11FIP1	240.125	-0.321151	0.146786	-2.18788	0.0286781	0.211573	210.896	268.073	1.32912	1.68946
ATP2B1	2714.39	0.412047	0.188448	2.18653	0.0287767	0.212181	3035.32	2191.13	21.6761	15.6475
KCP	47.4458	0.622875	0.284897	2.18631	0.0287926	0.212181	75.7719	35.6327	0.694723	0.326702
TRDMT1	162.286	-0.35727	0.163454	-2.18576	0.0288332	0.212362	133.592	175.216	0.862349	1.13103
ADCY3	1072.68	-0.434464	0.198928	-2.18402	0.0289606	0.213028	816.411	1160.04	9.19493	13.0651
XPC	1154.58	0.305091	0.139715	2.18366	0.0289871	0.213028	1358.7	1083.62	18.0833	14.4222
CHMP5	1768.02	0.299267	0.137049	2.18365	0.0289878	0.213028	1982.84	1589.62	47.4258	38.0208
DAPK1	872.168	-0.330362	0.151268	-2.18396	0.0289656	0.213028	848.155	1086.17	6.69205	8.57002
UBE2W	745.59	0.277421	0.127059	2.1834	0.0290062	0.213045	812.485	663.322	4.42634	3.61371
EFNA4	104.232	-0.421313	0.193087	-2.18199	0.0291102	0.213217	96.4944	134.348	3.8007	5.29167
SLC37A4	649.182	-0.320089	0.14665	-2.18267	0.0290603	0.213217	583.066	740.462	10.3991	13.2063
YBX3	2320.79	0.344502	0.157866	2.18225	0.0290914	0.213217	2423.19	1867.26	60.7767	46.8334
ALG5	658.101	0.307231	0.140797	2.18209	0.0291027	0.213217	647.452	515.78	26.4268	21.0524
GTPBP2	1138.06	-0.420553	0.192727	-2.18211	0.0291011	0.213217	986.261	1378.24	15.7466	22.0049
NLRX1	315.503	-0.370563	0.16985	-2.1817	0.0291316	0.213256	299.876	397.824	3.48767	4.62684
NME7	542.694	0.316986	0.145327	2.1812	0.0291686	0.213291	585.107	461.857	17.0205	13.4352
SAMD9L	454.054	0.468605	0.214838	2.1812	0.0291683	0.213291	588.85	398.762	4.07467	2.75931
LHFPL2	1905.25	0.329494	0.151079	2.18094	0.0291876	0.213313	2223.29	1737.05	21.8189	17.047
TUT1	394.059	-0.331173	0.151904	-2.18015	0.0292462	0.21339	362.114	463.892	6.3441	8.12722
EVI2A	235.237	0.463779	0.212714	2.1803	0.0292356	0.21339	270.801	184.333	4.45432	3.03204
TTC7A	700.033	-0.328226	0.150552	-2.18015	0.0292465	0.21339	642.078	820.672	5.5066	7.03826
C5orf66	41.5592	-0.55062	0.252612	-2.17971	0.0292792	0.213511	30.9565	51.8168	0.619513	1.03698
NT5C2	3037.19	0.253236	0.116315	2.17716	0.0294689	0.214658	3135.44	2610.57	43.9268	36.5735
NFKBIE	202.403	0.4739	0.21766	2.17725	0.029462	0.214658	253.677	170.28	4.86621	3.26643
TMEM217	25.1728	0.597085	0.274326	2.17655	0.0295139	0.214868	30.2935	15.7308	0.517724	0.268844
PRRT3	309.17	-0.462545	0.212648	-2.17517	0.0296173	0.215451	290.283	424.806	3.82134	5.59223
RAF1	2655.21	0.212623	0.0977557	2.17505	0.0296266	0.215451	2633.5	2262.7	39.8124	34.2068
CAPZA1	3929.76	-0.368594	0.169503	-2.17455	0.0296635	0.215538	3466.34	4599.21	62.6351	83.1055
VPS13A	1095.3	-0.42023	0.193257	-2.17445	0.029671	0.215538	897.413	1255.41	3.5277	4.93497
LAT	53.7847	0.539699	0.248247	2.17404	0.0297021	0.215645	63.6216	38.5183	1.70728	1.03364
ADCY6	1485.69	-0.279717	0.128693	-2.17352	0.0297415	0.215667	1390.66	1706.74	11.2836	13.8482
OGFOD2	270.251	-0.361039	0.166121	-2.17335	0.0297539	0.215667	250.709	329.632	4.4506	5.85165
RBBP8	1012.81	-0.310192	0.142706	-2.17364	0.0297325	0.215667	857.542	1080.18	11.943	15.0436
RBBP5	482.053	-0.381792	0.175717	-2.17277	0.0297979	0.215775	445.687	598.801	5.00254	6.72114
TMEM27	16.6695	0.622737	0.286616	2.17272	0.0298014	0.215775	27.515	12.0173	0.862203	0.376571
ZNF596	42.861	0.57234	0.26358	2.17141	0.0298999	0.21637	58.5365	33.1223	0.924752	0.523262
POC1B	521.819	0.292226	0.134634	2.17053	0.0299666	0.216501	517.459	417.281	7.07335	5.70397
CDK2AP1	2056.85	0.247839	0.11417	2.17078	0.0299475	0.216501	2201.07	1839.85	50.5455	42.2505
STARD7	3073.24	-0.267822	0.12339	-2.17053	0.0299671	0.216501	2822.31	3430.79	41.3048	50.2099
GEMIN2	122.125	-0.47088	0.216976	-2.17019	0.0299922	0.216565	102.627	152.306	3.73885	5.54877
PIP5K1A	2740.73	0.244031	0.112489	2.16938	0.0300538	0.216891	2714.89	2276.59	35.3075	29.6074
HSD17B7	284.335	0.498518	0.229822	2.16915	0.0300714	0.216901	292.447	189.188	8.27382	5.35246
TAOK2	1535.84	-0.280039	0.12913	-2.16866	0.0301083	0.217049	1426.09	1750.88	10.7616	13.2125
MRPL33	1143.37	0.294054	0.135645	2.16782	0.0301725	0.217341	1186.81	955.647	113.435	91.3408
GLI2	221.319	-0.480483	0.221656	-2.1677	0.0301817	0.217341	175.767	264.57	1.28562	1.93514
RBMS2	1062.62	-0.341807	0.15783	-2.16566	0.0303369	0.218282	950.824	1230.95	5.54746	7.18182
FBXL8	82.5459	-0.591492	0.27317	-2.16529	0.0303655	0.218282	60.4975	112.946	1.87321	3.49719
DKFZP434I0714	34.56	-0.535813	0.247475	-2.16512	0.0303783	0.218282	31.2836	50.5492	0.516288	0.834239
DST	4863.01	-0.530224	0.244869	-2.16534	0.0303616	0.218282	3897.09	6314.76	7.82111	12.6732
DTX3L	978.215	0.415679	0.192077	2.16412	0.0304549	0.218545	1273.05	915.308	10.9293	7.85805
HSPA1A	436.808	-0.509669	0.235522	-2.164	0.0304643	0.218545	371.951	582.266	1.5163	2.37368
OSR2	23.2394	-0.61087	0.282268	-2.16415	0.0304531	0.218545	18.2492	36.5382	0.42499	0.850904
GUK1	2232.14	0.232941	0.107664	2.16359	0.030496	0.218654	2325.3	1966.01	89.9428	76.0453
TCF20	798.964	-0.307767	0.142325	-2.16242	0.0305861	0.219181	720.948	906.238	1.62788	2.04626
SNRPA	1492.95	-0.279415	0.129235	-2.16207	0.0306129	0.219255	1307.13	1604.47	39.7277	48.765
RSRP1	369.4	-0.463829	0.214594	-2.16143	0.0306625	0.219372	348.1	510.738	11.7642	17.2607
UBE2E3	1846.01	0.302487	0.139936	2.16161	0.0306482	0.219372	2029.08	1621.72	47.907	38.2891
LNPEP	522.523	-0.40597	0.187955	-2.15994	0.0307776	0.220077	501.632	690.606	5.17957	7.13082
ARID5B	675.462	-0.434533	0.201217	-2.15952	0.0308099	0.22019	664.806	942.78	4.00717	5.68268
ASF1B	1091.68	-0.506561	0.234726	-2.15809	0.0309205	0.22078	817.405	1279.01	23.3796	36.5826
XXYLT1	402.22	-0.304483	0.141093	-2.15803	0.0309258	0.22078	379.131	474.845	6.52904	8.17732
FOXS1	177.193	-0.605259	0.280596	-2.15705	0.0310019	0.221204	130.705	337.717	4.90993	12.6863
FOXD2-AS1	39.5072	-0.562151	0.260717	-2.15617	0.0310704	0.221573	34.0345	58.2096	0.672145	1.14958
PARP1	3165.85	-0.373026	0.173042	-2.15569	0.0311077	0.221601	2554.77	3408.01	31.741	42.3419
SCOC-AS1	10.869	0.617638	0.286491	2.15587	0.0310937	0.221601	15.8799	6.87023	0.389798	0.168641
SRP14	6470.79	0.231429	0.107433	2.15418	0.0312262	0.222325	7497.88	6347.62	314.596	266.334
LRP5	1432.35	-0.368816	0.171253	-2.15363	0.0312692	0.222393	1225.51	1628.14	11.3349	15.0589
LIMCH1	1891.75	-0.420926	0.195432	-2.15382	0.0312544	0.222393	1682.17	2355.89	12.3094	17.2394
MTX2	812.243	0.234513	0.108918	2.15312	0.0313094	0.22244	838.601	708.357	26.0801	22.0296
ICE1	1091.8	-0.272124	0.126374	-2.15331	0.031294	0.22244	1006.91	1228.53	6.27234	7.65286
XRCC5	9898.19	-0.275665	0.128068	-2.15248	0.0313595	0.222558	8937.24	10935.1	129.005	157.844
TPMT	837.509	0.278519	0.129395	2.15248	0.0313597	0.222558	828.721	675.968	12.5514	10.2378
MTF1	547.862	-0.313257	0.14557	-2.15193	0.0314029	0.222745	480.396	606.974	2.98352	3.76964
LOC100126784	370.536	0.358408	0.166579	2.15157	0.0314309	0.222825	372.107	283.018	4.92731	3.74762
HNRNPH1	9666.82	0.328047	0.152528	2.15073	0.0314977	0.223179	9603.34	7506.13	207.627	162.285
IFITM2	849.044	-0.283155	0.131686	-2.15024	0.0315366	0.223191	801.105	985.771	54.3331	66.8576
CNEP1R1	356.554	0.277477	0.129052	2.15012	0.0315458	0.223191	390.632	318.671	8.91674	7.27412
DNAJC25	192.49	0.41436	0.19272	2.15007	0.03155	0.223191	204.5	146.699	4.04026	2.89831
SNAP23	1235.44	0.283723	0.131987	2.14962	0.0315853	0.223322	1278.48	1038.04	23.9675	19.46
CETN2	1339.56	0.269772	0.125526	2.14913	0.0316241	0.223477	1457.88	1197.05	66.8337	54.8766
VPS37B	2001.82	0.2516	0.117096	2.14866	0.0316617	0.223623	2167.05	1805.58	39.0293	32.5191
TNIP2	661.033	0.276508	0.128781	2.14711	0.0317844	0.22437	644.441	526.384	15.6482	12.7815
FOSB	441.328	-0.449638	0.209465	-2.1466	0.0318249	0.224537	183.382	1040.22	2.40449	13.6392
PKD1	2413.43	-0.423735	0.197471	-2.14582	0.0318877	0.224621	2007.27	2821.97	7.02936	9.88238
CD164	8407.07	0.243445	0.113443	2.14596	0.0318758	0.224621	9257.37	7764.06	147.281	123.523
PCMT1	1782.95	0.228162	0.10632	2.14599	0.0318734	0.224621	1847.25	1567.96	49.4638	41.985
RNASEL	50.1136	0.501493	0.233732	2.14559	0.0319055	0.224627	71.2934	46.1483	0.832297	0.538747
ROBO1	1531.2	-0.313567	0.146171	-2.14521	0.0319365	0.224725	1464.11	1848.92	9.17462	11.586
FOCAD	1225.36	-0.237587	0.110796	-2.14435	0.0320045	0.225085	1123.7	1334.06	9.12646	10.835
GUSBP1	115.353	0.415465	0.193779	2.14402	0.0320316	0.225143	120.758	86.754	0.984325	0.707151
FRMD3	52.9963	0.564149	0.26315	2.14383	0.0320467	0.225143	56.0787	31.7043	0.460675	0.260444
LOC344887	32.748	0.614392	0.286629	2.14351	0.0320719	0.2252	48.2143	20.4563	1.10208	0.467592
KIAA2026	500.572	-0.298276	0.139202	-2.14275	0.0321332	0.225511	486.276	605.709	3.342	4.16282
TMEM240	48.5491	-0.529885	0.247564	-2.1404	0.0323228	0.226563	38.7953	62.9085	1.71958	2.78839
MCTP1	1046.38	0.334627	0.156349	2.14025	0.0323344	0.226563	1171.13	910.322	10.7377	8.34639
ADRB2	206.913	-0.44789	0.209261	-2.14034	0.0323271	0.226563	159.623	231.352	3.87024	5.60939
FUNDC1	351.685	0.344641	0.161091	2.13942	0.0324018	0.226915	395.223	304.11	16.7245	12.8689
RWDD4	572.282	0.33937	0.158647	2.13914	0.032424	0.226951	621.75	481.092	11.6824	9.03952
ALX3	36.4816	-0.539726	0.252386	-2.1385	0.0324766	0.227103	30.4516	50.2734	1.02008	1.68408
ACOT2	593.528	-0.33265	0.155556	-2.13845	0.0324799	0.227103	569.248	730.953	12.3127	15.8103
ZKSCAN8	772.494	-0.338957	0.158522	-2.13823	0.0324982	0.22711	723.584	934.445	4.73562	6.11564
ZDHHC23	88.1894	-0.417602	0.195358	-2.13763	0.0325467	0.227329	79.4144	110.797	1.04127	1.45275
ANKRD13B	287.622	-0.433254	0.202735	-2.13704	0.0325945	0.227519	242.646	344.831	3.78617	5.38064
CYB5A	387.344	-0.373174	0.174687	-2.13624	0.0326598	0.227519	349.919	466.899	20.0982	26.8172
KHK	79.6184	-0.502754	0.235334	-2.13634	0.0326514	0.227519	63.2417	98.8961	1.22789	1.92016
NUP43	628.19	-0.359195	0.16811	-2.13666	0.0326253	0.227519	522.805	689.204	6.68327	8.81045
DOCK5	1153.15	-0.362793	0.169824	-2.13629	0.0326559	0.227519	910.161	1203.39	5.9646	7.88626
ZFP14	34.0488	-0.547064	0.256167	-2.13557	0.0327143	0.22754	30.4555	50.6429	0.201156	0.334493
TIAM1	222.294	-0.400104	0.187321	-2.13592	0.0326859	0.22754	192.673	264.353	1.32528	1.81832
KHDC1	107.757	-0.417002	0.19525	-2.13574	0.032701	0.22754	94.4509	131.998	1.51878	2.12253
TNRC18	2504.19	-0.336866	0.157777	-2.13508	0.0327544	0.2277	2355.33	3037.72	11.0325	14.2289
WDFY1	3283.11	0.2342	0.109704	2.13483	0.0327751	0.227724	3242.63	2739.66	34.4221	29.0828
ZNF503	605.585	-0.259604	0.121627	-2.13443	0.0328075	0.227733	616.025	743.797	8.25432	9.96637
CSNK1E	16.4844	0.604757	0.283339	2.13439	0.0328107	0.227733	15.9528	7.17857	0.273203	0.122938
RPRD2	1089.14	-0.270808	0.126921	-2.13367	0.0328702	0.22779	1054.2	1285.23	6.34883	7.74021
CD2BP2	1739.52	0.235746	0.110489	2.13366	0.0328705	0.22779	1770.53	1493.95	24.0295	20.2758
ZNF70	97.1312	-0.422885	0.198162	-2.13404	0.0328396	0.22779	84.4574	118.439	1.0407	1.45943
PI4KB	1877.39	0.219272	0.102841	2.13216	0.032994	0.227922	1960.51	1675.13	22.2935	19.0483
CNIH4	1387.34	0.246052	0.11535	2.1331	0.0329167	0.227922	1418.01	1186.66	29.5481	24.7273
SNORD25	21.5973	-0.607996	0.285127	-2.13237	0.0329763	0.227922	11.8315	26.4019	8.74305	19.51
CYFIP1	3184.54	-0.235452	0.11042	-2.13233	0.0329795	0.227922	2879.37	3412.44	16.2054	19.2056
SARS2	398.084	-0.314862	0.147663	-2.13231	0.0329817	0.227922	361.949	458.305	8.38965	10.6231
KIF13A	1579.37	-0.359084	0.168376	-2.13263	0.0329549	0.227922	1465.74	1929.24	8.32793	10.9614
CORO2A	32.3584	0.565364	0.265185	2.13196	0.03301	0.227922	37.3446	20.8683	0.321054	0.179406
AKR7A2	882.316	-0.296299	0.139077	-2.13046	0.0331333	0.228535	812.647	1011.82	15.3626	19.1279
MFSD1	770.297	0.280926	0.131854	2.13059	0.0331233	0.228535	898.458	730.768	17.8935	14.5538
AZIN2	211.592	-0.441333	0.207272	-2.12925	0.0332338	0.228544	212.69	304.066	4.09902	5.86006
ZRANB2-AS1	15.8919	-0.610132	0.286555	-2.1292	0.033238	0.228544	10.836	24.5247	0.320106	0.724481
LINC00520	23.9934	0.608578	0.285813	2.12928	0.0332307	0.228544	34.8533	15.8789	0.834028	0.379977
SP110	390.426	0.422321	0.198293	2.12978	0.03319	0.228544	491.432	350.02	7.83104	5.57763
ARL8B	2095.54	0.31668	0.148671	2.13007	0.0331657	0.228544	2407.5	1900.37	39.9319	31.5203
CEP70	684.058	0.34309	0.161081	2.12993	0.0331778	0.228544	739.909	570.502	12.2519	9.44677
IRF2	338.011	-0.343043	0.161169	-2.12847	0.0332982	0.228839	336.979	436.179	7.29834	9.44683
CCDC80	7868.73	-0.450636	0.211867	-2.12698	0.0334218	0.229569	6837.47	9925.35	71.8435	104.289
KIAA1804	99.3395	-0.421909	0.198449	-2.12604	0.0335003	0.229763	73.1696	103.127	0.623629	0.878961
FMNL1	731.918	0.391091	0.183937	2.12622	0.0334851	0.229763	734.284	540.106	9.17818	6.75106
GATAD1	762.069	0.232476	0.109348	2.12601	0.0335021	0.229763	822.848	695.937	8.86222	7.49537
MSL3	798.589	0.226553	0.10661	2.12506	0.0335816	0.23019	842.903	716.144	8.41043	7.14564
SAP30BP	1411.39	0.24689	0.116201	2.12467	0.0336139	0.230292	1394.83	1166.78	24.4282	20.4343
SMAD6	140.63	-0.462879	0.21808	-2.12252	0.0337941	0.231407	144.985	212.152	2.38481	3.48961
TTC3	4846.32	-0.276484	0.13037	-2.12076	0.0339416	0.232177	4590.13	5621.12	24.9708	30.5796
STAC	960.001	-0.316798	0.149371	-2.12088	0.033932	0.232177	823.406	1044.08	13.2232	16.7671
CHD2	2072.63	-0.27479	0.129665	-2.11923	0.0340712	0.232902	2043.71	2498.76	10.6276	12.9939
ATP6V1E1	2540.72	0.256139	0.120872	2.11909	0.0340828	0.232902	2835.54	2353.84	99.8501	82.8873
PRPF38B	988.62	-0.247945	0.117047	-2.11834	0.0341466	0.232945	888.37	1063.85	11.7102	14.0233
TUFT1	436.695	-0.452961	0.21384	-2.11822	0.0341561	0.232945	388.359	565.137	5.91627	8.6093
RBM5-AS1	52.5099	-0.587956	0.277575	-2.11818	0.0341595	0.232945	42.4359	79.8639	1.51589	2.85289
CUL1	2338.92	0.261581	0.123459	2.11878	0.0341094	0.232945	2310.5	1909.95	35.6479	29.468
ELMOD3	345.631	0.329407	0.155532	2.11794	0.0341804	0.232969	367.721	286.966	5.88241	4.59058
PSPC1	1029.35	0.287275	0.135688	2.11718	0.0342445	0.233285	1070.35	866.36	16.8662	13.6518
TOR1A	1931.49	0.233535	0.110316	2.11696	0.0342634	0.233294	2038.6	1723.22	47.9259	40.5117
PHF12	688.027	-0.336364	0.15898	-2.11576	0.0343656	0.23351	661.383	852.164	5.6254	7.24808
PKP4	2288.46	0.351384	0.166079	2.11576	0.0343649	0.23351	2108.05	1611.5	21.876	16.7232
PID1	328.946	0.286276	0.135293	2.11597	0.0343475	0.23351	406.868	329.212	7.13829	5.77585
PIGA	227.796	0.394377	0.186392	2.11585	0.0343576	0.23351	226.401	165.769	3.09134	2.26346
CTSK	2998.4	0.310688	0.146901	2.11495	0.0344341	0.233856	3671.02	2911.84	100.417	79.6502
AXL	16197.5	-0.365658	0.17291	-2.11473	0.0344533	0.233866	13282.7	17613	134.211	177.965
AGAP7P	30.4198	0.561701	0.265678	2.11422	0.0344968	0.233972	31.2446	17.3752	0.642682	0.357398
DTNBP1	316.434	0.289912	0.137131	2.11413	0.0345043	0.233972	325.985	263.571	6.3095	5.10147
SLAIN2	1560.54	0.215394	0.101909	2.1136	0.0345494	0.234158	1533.85	1314.78	12.6338	10.8294
OSBP2	182.397	0.45721	0.216345	2.11334	0.0345717	0.23419	182.61	124.183	1.7297	1.17627
FAM195B	1379.23	0.255574	0.120956	2.11295	0.0346049	0.234262	1409.19	1170.07	49.0989	40.7675
RP9	208.793	0.322484	0.152633	2.1128	0.0346177	0.234262	206.633	162.378	9.1344	7.17806
SASS6	175.738	-0.545432	0.258224	-2.11225	0.0346654	0.234379	126.872	215.83	1.55599	2.64698
PHOSPHO2	31.05	0.536239	0.253879	2.11219	0.0346705	0.234379	39.0893	23.46	1.40956	0.845968
SWT1	101.84	0.432485	0.20483	2.11144	0.0347347	0.234543	132.923	93.3793	1.66821	1.17193
TMCO3	3663.44	0.221582	0.104955	2.1112	0.0347552	0.234543	3787.53	3230.49	60.7656	51.8287
PCNA	2347.22	-0.337238	0.159719	-2.11144	0.0347344	0.234543	2141.77	2764.86	73.5369	94.9304
C4orf33	254.605	0.358541	0.169838	2.11108	0.0347654	0.234543	304.477	230.977	7.75453	5.8826
ADGRL4	4754.39	0.235341	0.111503	2.11063	0.034804	0.234595	5119.03	4319.12	70.032	59.0887
KHDRBS3	1044.66	0.379212	0.179672	2.11058	0.0348085	0.234595	1193	887.727	30.0133	22.3332
RPS19BP1	1178.44	0.250138	0.118573	2.10956	0.0348962	0.235066	1187.7	990.766	57.764	48.186
XPOT	3850.36	0.264949	0.125624	2.10907	0.0349389	0.235234	3774.27	3110.85	47.3439	39.022
ZNF468	136.145	0.364218	0.172724	2.10867	0.0349732	0.235345	146.873	110.982	1.69663	1.28203
FAM160A1	75.8145	-0.468134	0.222068	-2.10807	0.0350251	0.235575	69.2287	102.424	0.749027	1.10819
ZNF592	1016.34	-0.254191	0.12061	-2.10755	0.0350697	0.235755	957.861	1152.44	5.79829	6.97617
ATG5	1143.64	0.253337	0.120234	2.10703	0.035115	0.23594	1178.2	980.298	17.1366	14.2582
DOCK1	2930.03	-0.289849	0.137664	-2.10549	0.0352491	0.236721	2638.75	3269.06	19.0446	23.5937
IDI1	1575.85	0.499929	0.237504	2.10493	0.0352977	0.236874	1666.84	1065.73	38.6359	24.7027
ABT1	374.122	-0.35351	0.167953	-2.10481	0.0353076	0.236874	354.682	464.507	7.75983	10.1626
GOSR1	1106.34	0.260211	0.123642	2.10456	0.0353294	0.2369	1118.49	925.747	10.5742	8.75199
CLSPN	674.616	-0.527461	0.250781	-2.10328	0.0354415	0.237172	502.324	823.634	2.93144	4.80652
RNF115	667.126	0.250971	0.119315	2.10344	0.0354275	0.237172	663.873	553.629	16.8644	14.0639
BMP4	631.126	-0.456687	0.217098	-2.1036	0.0354133	0.237172	616.852	902.255	14.7255	21.5386
RHPN1	99.0058	-0.523951	0.249108	-2.10331	0.0354384	0.237172	84.4062	136.3	1.1249	1.81649
PROS1	2102.06	0.26185	0.124522	2.10284	0.03548	0.23731	2524.25	2085.58	34.9097	28.843
PLA2G16	945.28	0.266535	0.126796	2.10207	0.035547	0.237638	1087.27	894.357	37.963	31.2271
HERC3	432.451	-0.347303	0.165255	-2.10162	0.0355866	0.237782	389.872	508.156	3.88074	5.05811
ZBTB42	152.761	-0.379158	0.180442	-2.10127	0.035617	0.237866	140.497	188.154	1.97	2.63824
AMPD2	1913.79	-0.293125	0.139586	-2.09996	0.0357322	0.238307	1822.56	2263.35	18.9094	23.4827
GLI3	448.179	-0.33906	0.161435	-2.10029	0.0357032	0.238307	412.813	534.061	2.48826	3.2191
SEC61B	1881.06	0.303192	0.144384	2.09991	0.035737	0.238307	2048.11	1634.41	180.433	143.986
KBTBD4	302.88	-0.300774	0.143314	-2.09871	0.0358426	0.23865	285.881	357.11	5.64583	7.05253
STK11	1732.56	0.322278	0.153553	2.09881	0.0358332	0.23865	1803.12	1415.1	27.2507	21.3865
ASNS	627.183	0.397746	0.189516	2.09874	0.0358397	0.23865	606.479	442.326	11.8872	8.66974
HPS4	884.996	0.256586	0.122294	2.09811	0.0358954	0.238806	950.199	788.122	8.35017	6.92587
ULK4	168.805	0.379981	0.181113	2.09804	0.0359019	0.238806	186.021	138.211	2.11287	1.56984
KIF13B	816.556	-0.217734	0.103811	-2.09741	0.0359569	0.239051	830.911	971.019	4.693	5.48433
HEATR5B	434.478	-0.340325	0.162353	-2.0962	0.0360642	0.239524	401.254	519.957	2.91979	3.78356
PTTG1IP	9294.56	0.240239	0.114601	2.09631	0.0360548	0.239524	9592.77	8062.99	168.062	141.261
GLIS1	393.009	-0.334949	0.15981	-2.09593	0.0360885	0.239565	396.679	510.232	6.97436	8.97083
PCIF1	587.938	-0.349673	0.16687	-2.09549	0.0361277	0.239706	579.677	756.36	10.6415	13.885
MRPL45P2	50.0335	0.511101	0.244111	2.09373	0.0362845	0.240505	66.4354	41.7843	2.3562	1.48192
RCHY1	434.605	0.292027	0.139475	2.09375	0.036282	0.240505	494.84	398.931	5.44319	4.3882
[truncated: 24,486 more rows]
